# Supplementary material for: Identification and classification of ion-channels across the tree of life provide functional insights into understudied CALHM channels
Source: eLife journal article supplement (doi:10.7554/elife.106134), 2025-05-09

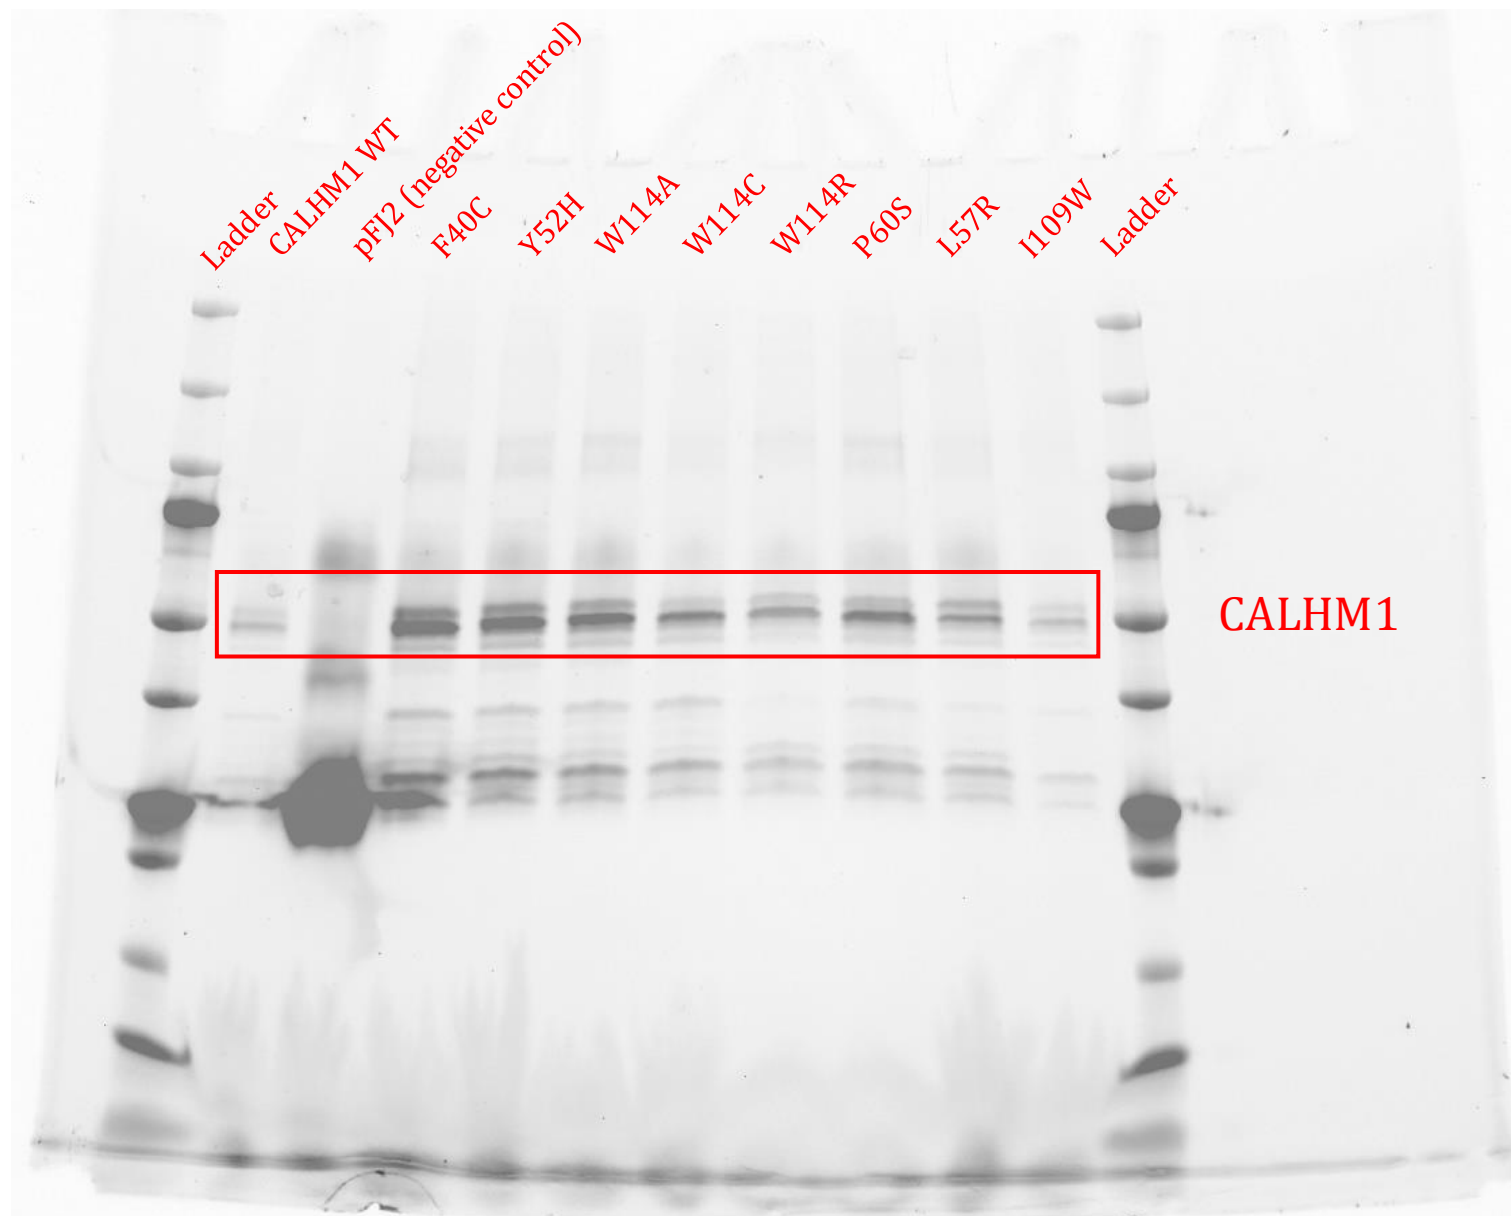

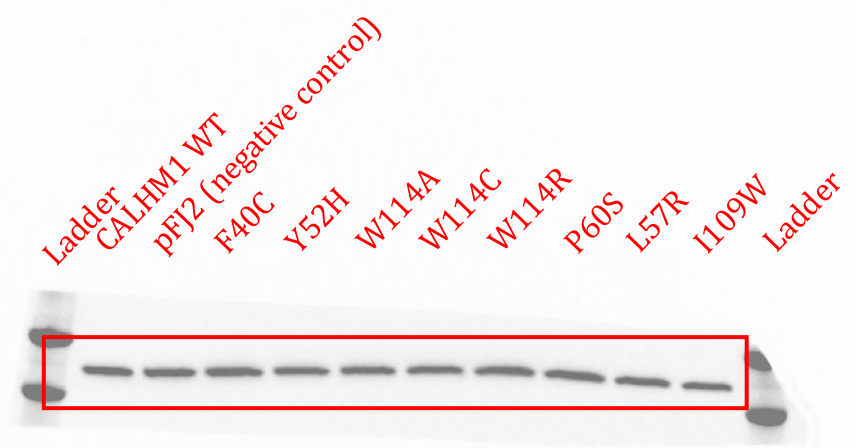

Beta-actin

CALHM1

Ladder  
CALHM1 WT  
pFJ2 (negative control)  
F40A  
Y52A  
Ladder

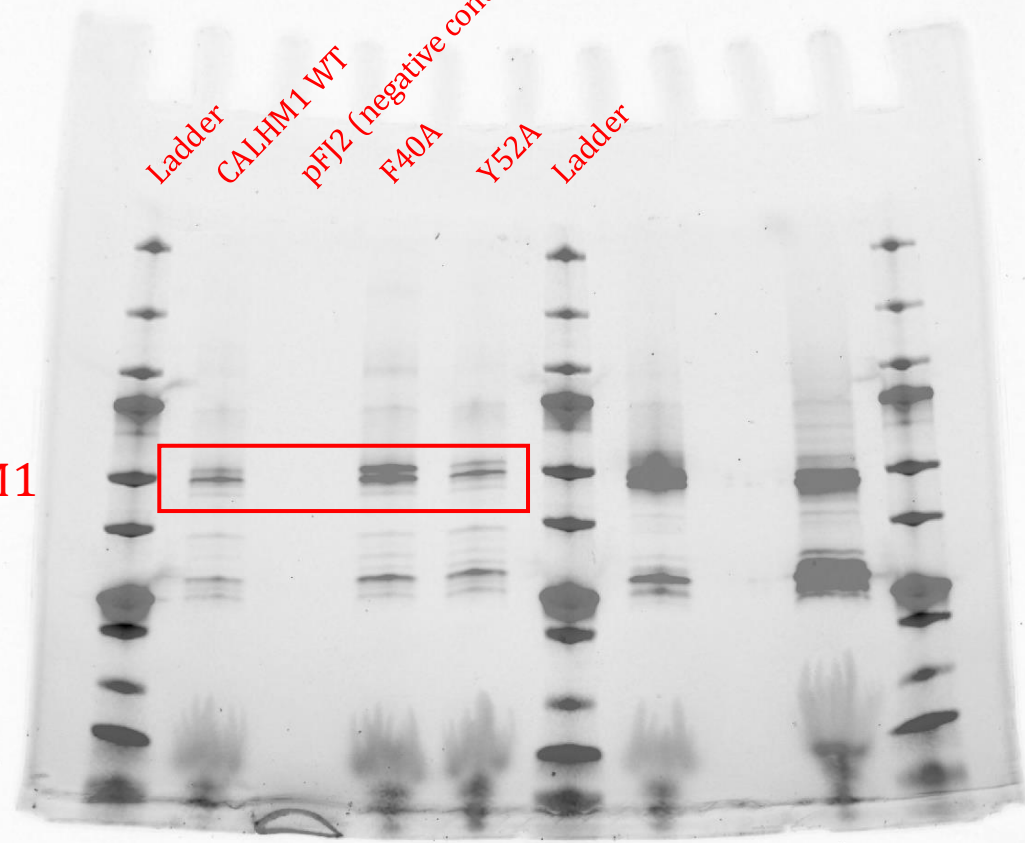

Beta-actin

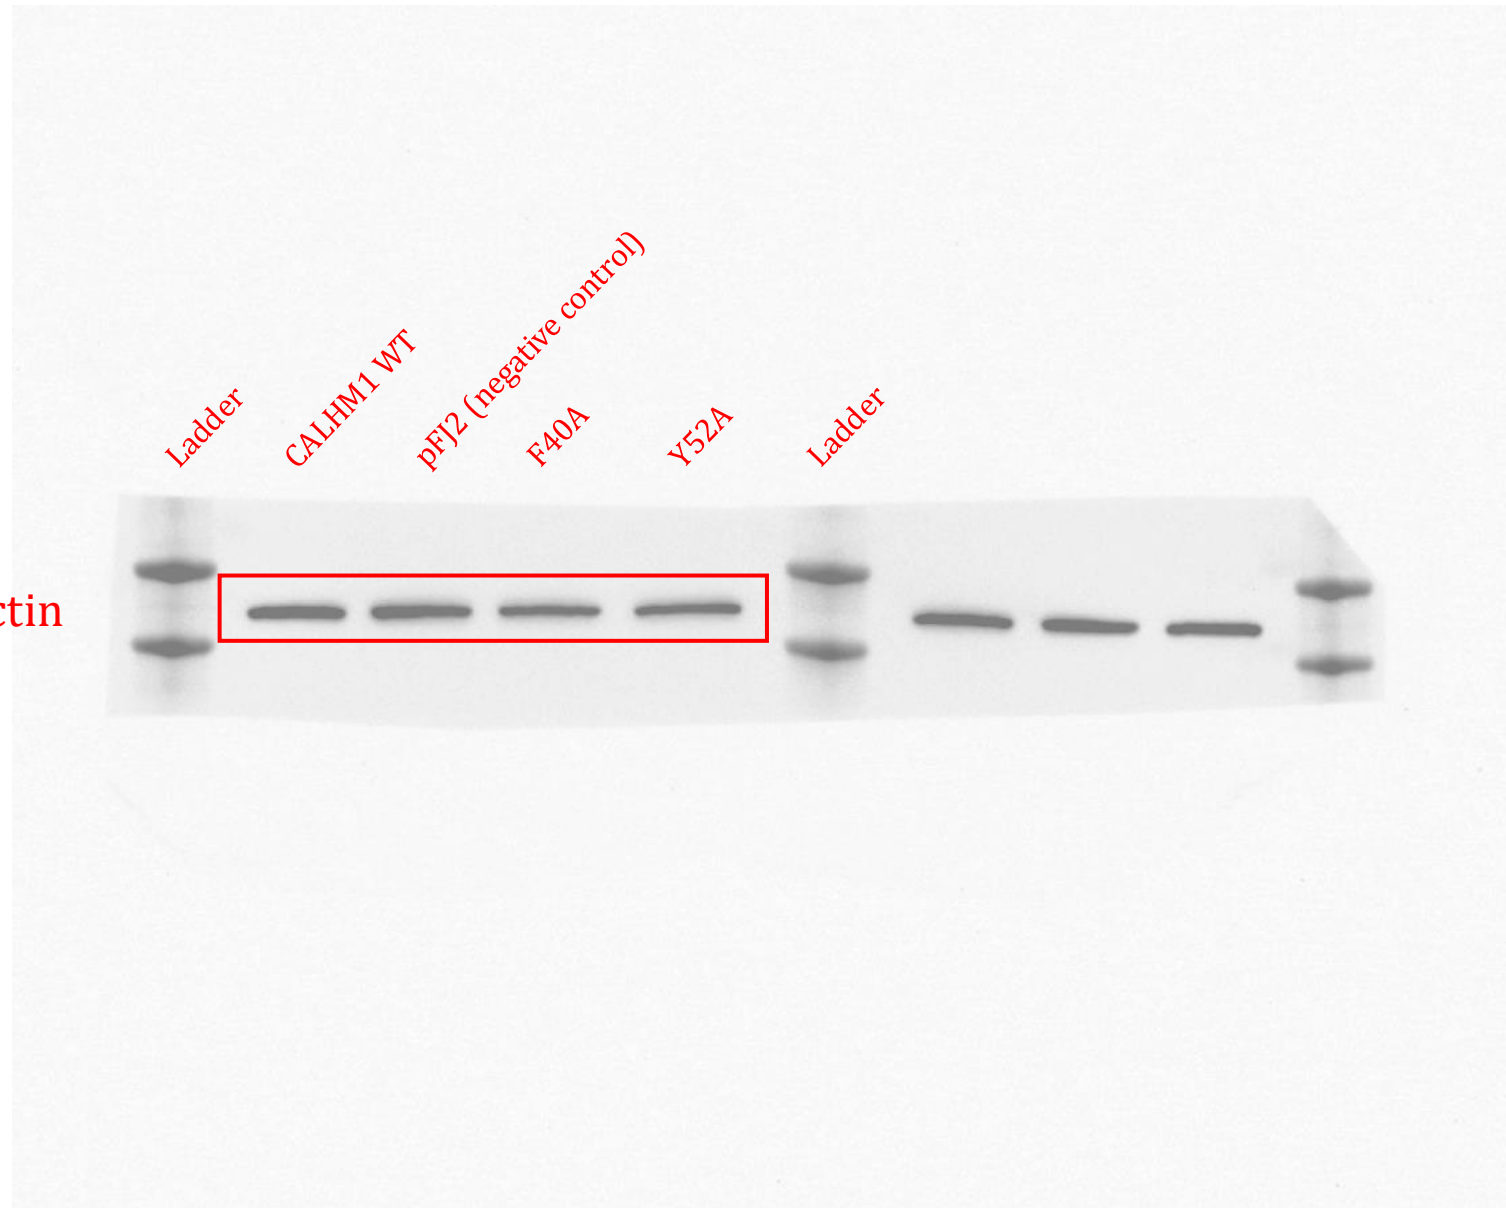

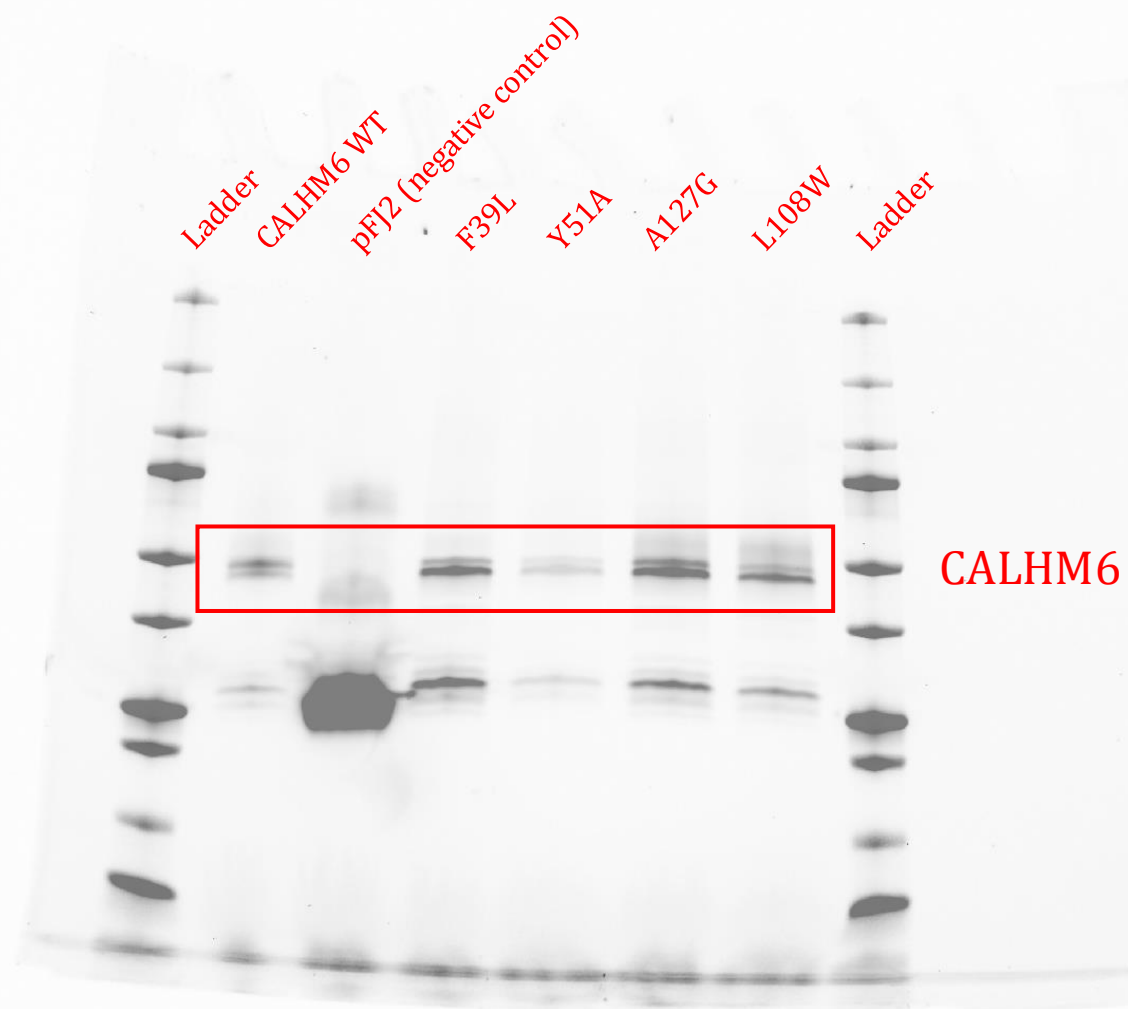

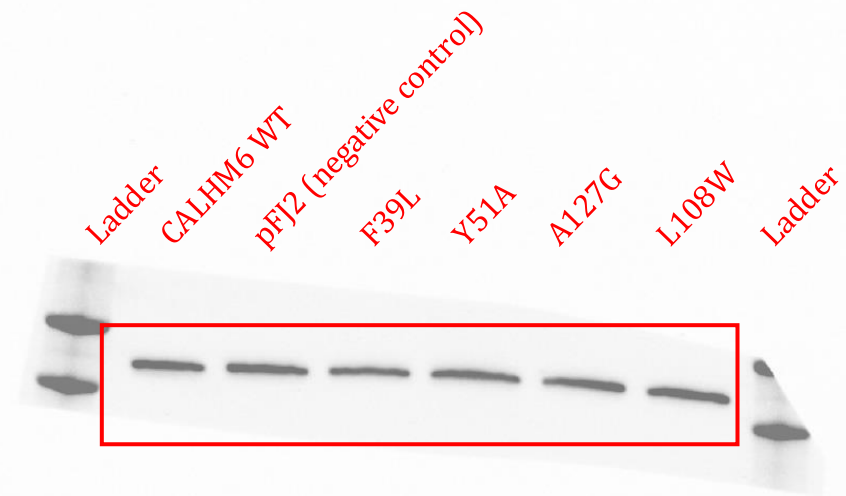

Beta-actin

CALHM6

Ladder  
CALHM6 WT  
pFJ2 (negative control)  
F39A  
Ladder

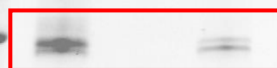

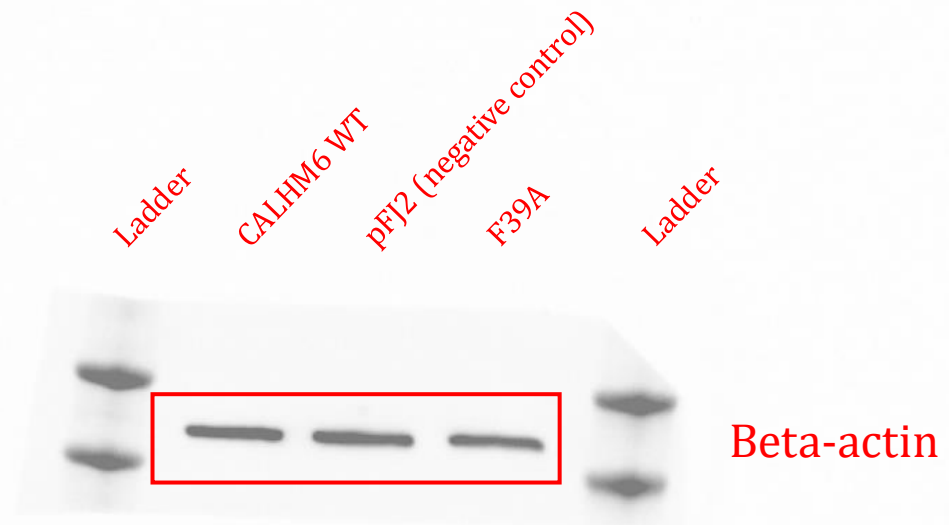



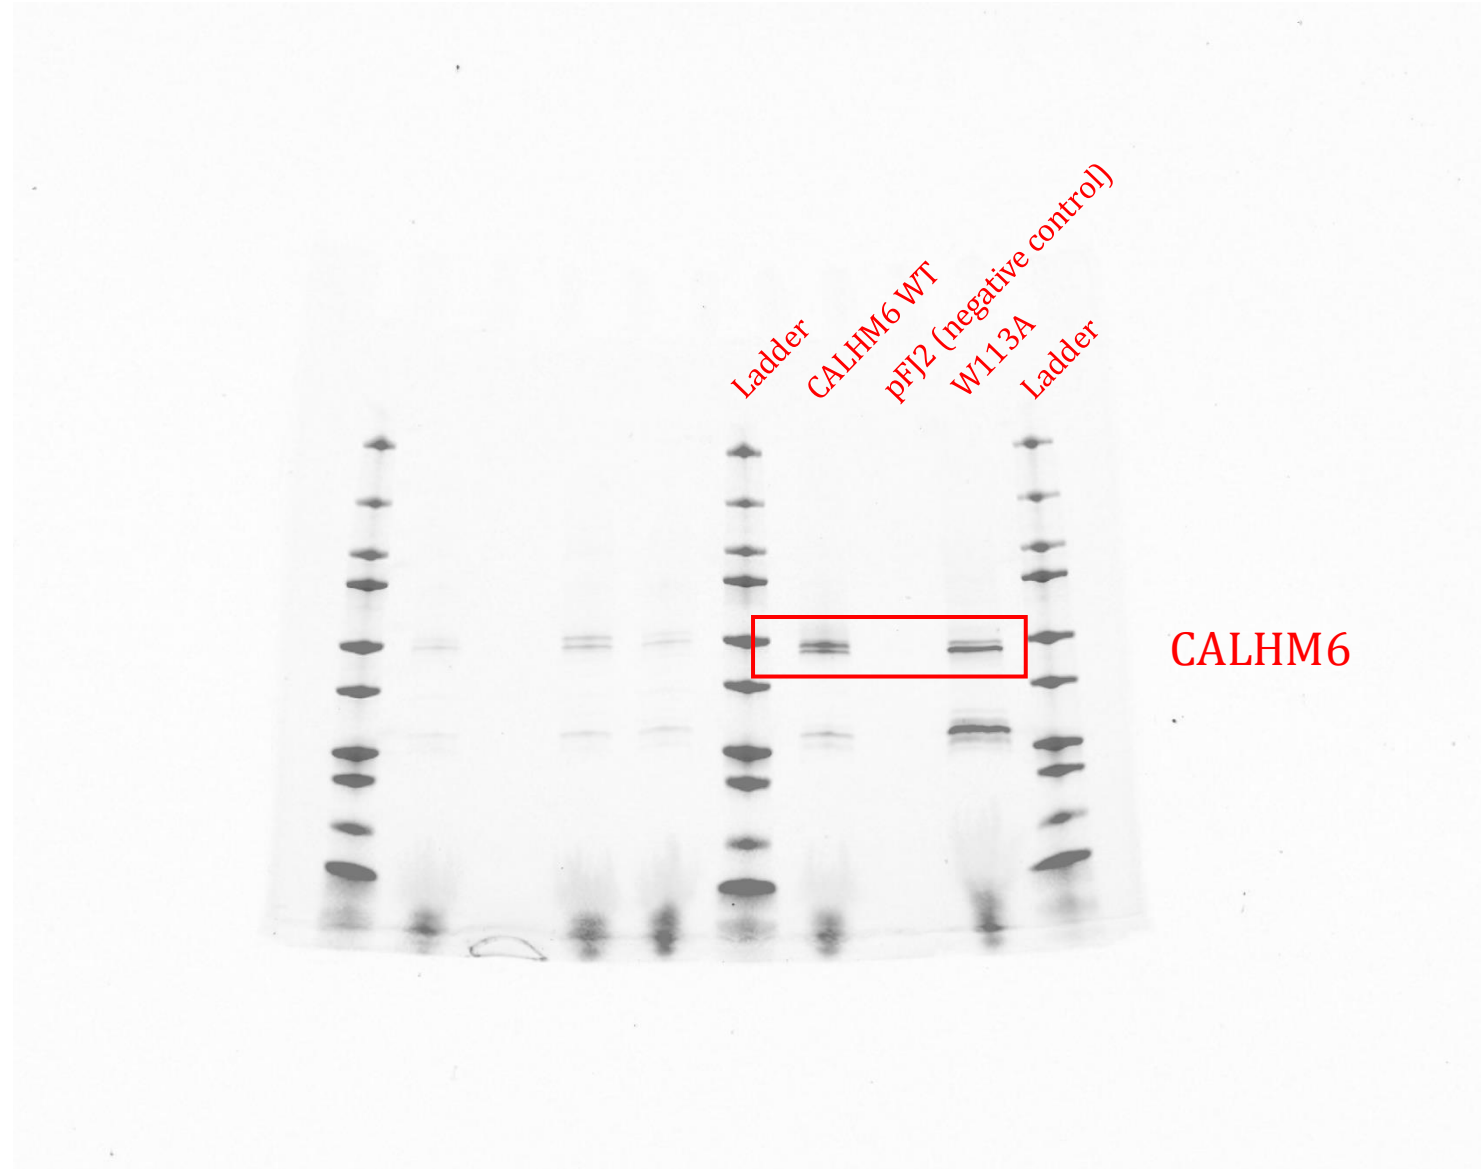

Beta-actin

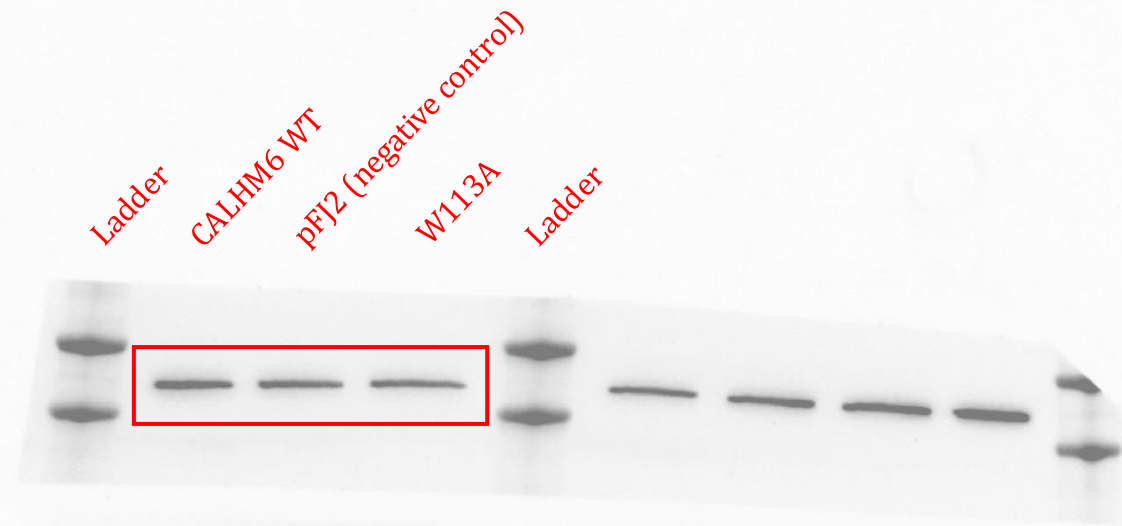

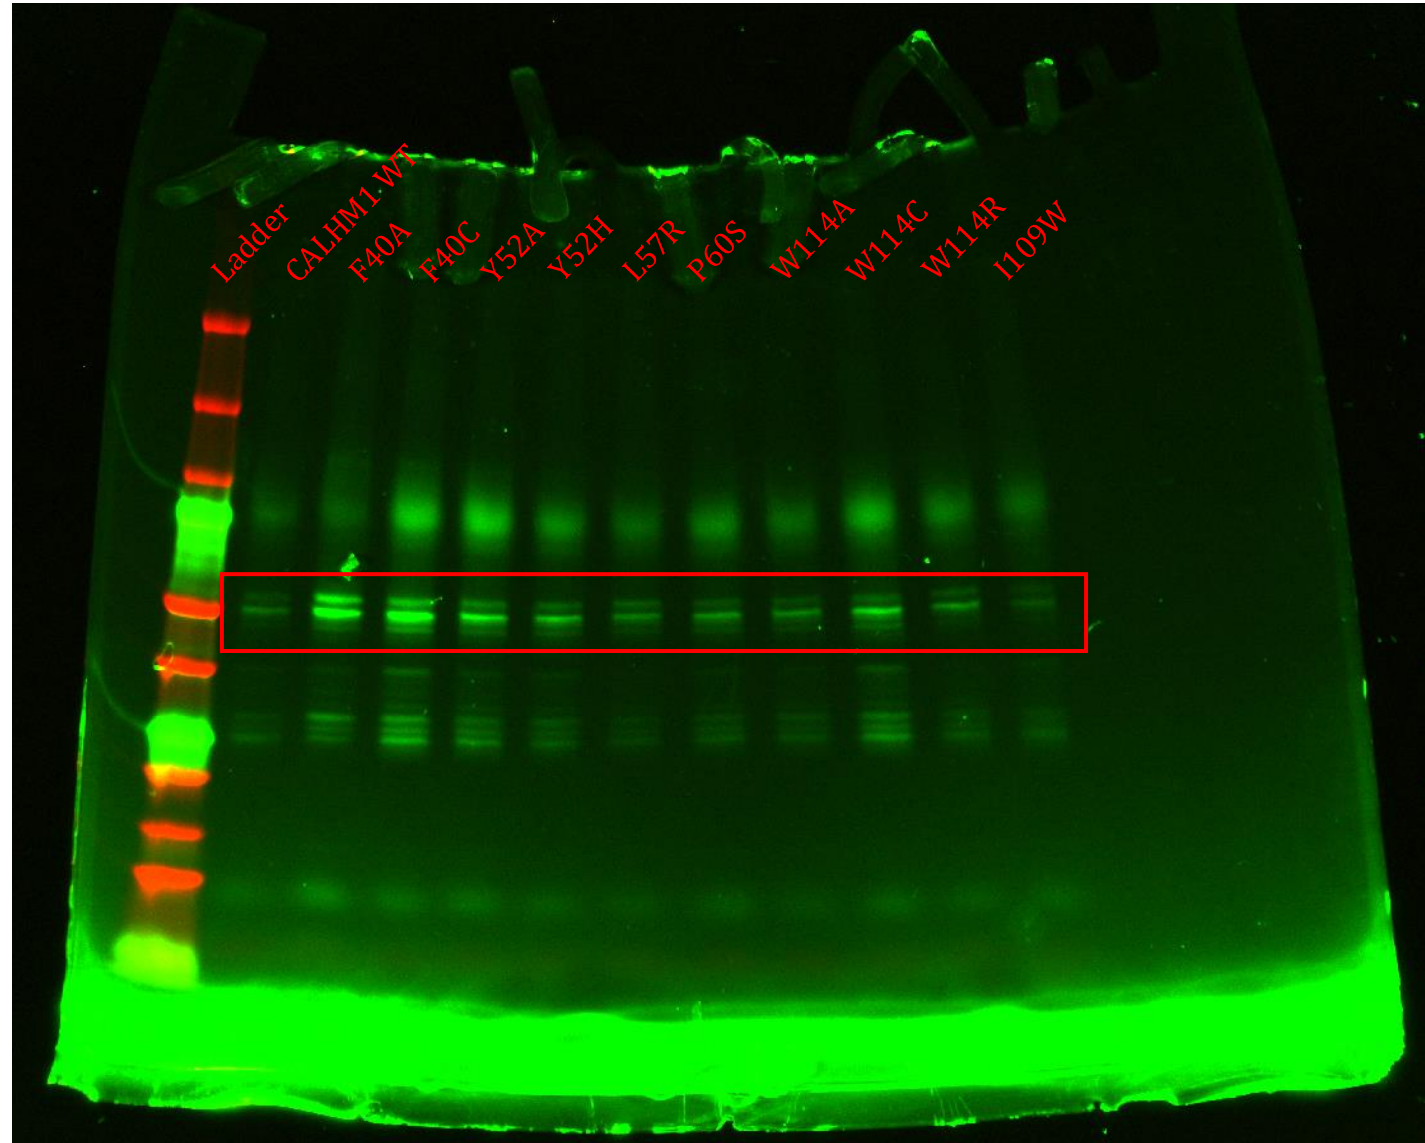

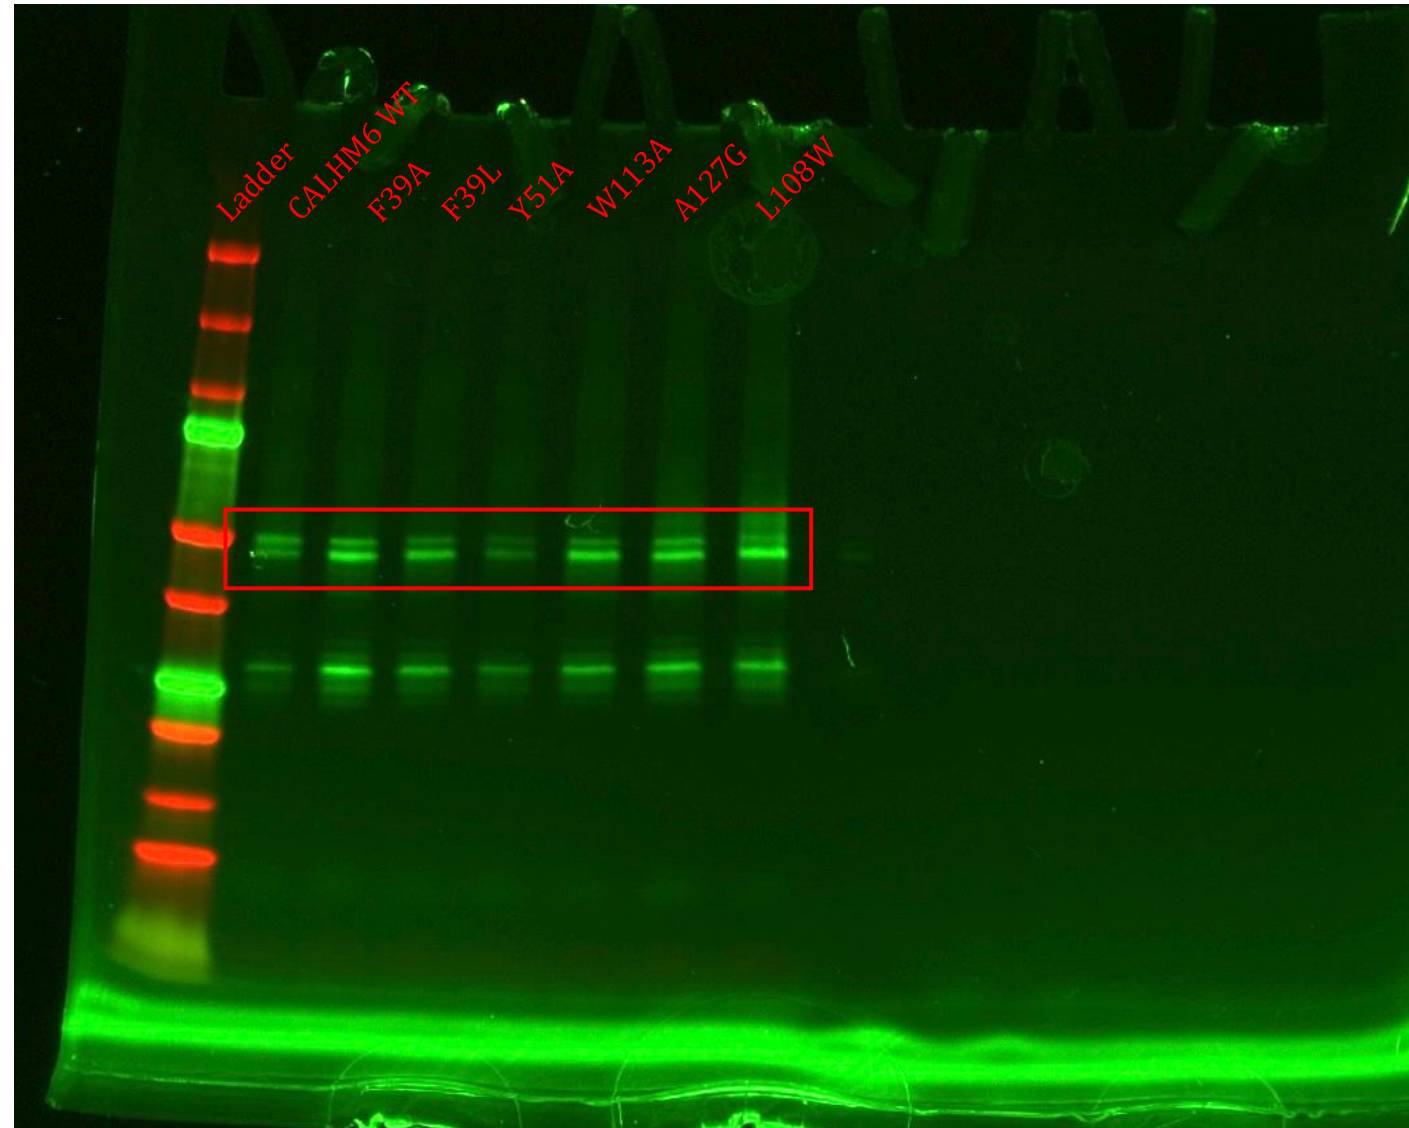

Supplement: fig4-figsupp1-data1 [file Figure-supplementary-4_source-data_labeled.pdf › Figure-supplementary-4_source-data_labeled.pdf]
