# Supplementary material for: Identification and classification of ion channels across the tree of life provide functional insights into understudied CALHM channels
Source: eLife. 2026 May 18;14:RP106134. doi: 10.7554/eLife.106134 (PMC13183375; doi:10.7554/eLife.106134)
Supplement: Supplementary file 1. — (A) Table showing the enriched GO terms for each IC cluster. An * in the ion and gate mechanism columns indicates annotations not verified by the retrieval augmented generation (RAG) system. (B) Table showing the presence/absence of curated human IC channels in other ion channel databases listed in Kyoto Encyclopedia of Genes and Genomes (KEGG), Guide to Pharmacology (GtoP), and Pharos. (C) List of human IC orthologs detected across the tree of life. (D) Table showing the enriched Gene Ontology (GO) terms for each IC cluster. [file elife-106134-supp1.xlsx]

## Sheet: Table A
Table A: Human IC annotation table. An * in the Ion and Gate Mechanism columns indicates annotations not verified by the RAG system.
Identifier labels					Classification labels					Functional labels					Complex/Interaction related labels					Structure related labels		TM and pore domain related labels
																										MOLE predictions					UniProt TM annotations					Literarture search based TM labels
Uniprot	Name	Symbol	Target Development level (Pharos)	Length	Family designation	Group	Class	Family	Sub Family	Unit	Ion	Gate Mechanism	Lit Resource	Uniprot Function	Auxiliary	Characterized domains	Auxiliary domain	Auxiliary protein	Notable interactors	PDB ID	Alphafold ID	Pore Domain start	Pore Domain end	Domain length	Does it pass through membrane at least once	MOLE pore residue first	MOLE pore residue last	# of TM domains (predicted by TMHMM)	# of TM domain (predicted by Phobius)	TM organization	# of Transmembranes (TMs) + Intramembranes (IMs)	# of TMs	TM Start (UniProt)	TM End (UniProt)	TMsList	TM Lit resource	Lit based TMstart_1	Lit based TMend _1	Lit based TMstart_2	Lit based TMend_2	Lit based TMstart_3	Lit based TMend_3	Lit based TMstart_4	Lit based TMend_4	Lit based TMstart_5	Lit based TMend_5	Lit based TMstart_6	Lit based TMend_6	Lit based TMstart_7
O75762	Transient receptor potential cation channel subfamily A member 1	TRPA1 (ANKTM1)	Tclin	1119	TRP	VGIC		TRP	TRPA	pore-forming	non-selective cation(*)	ligand-gated(*)	PubMed:25389312, PubMed:25855297	Receptor-activated non-selective cation channel involved in pain detection and possibly also in cold perception, oxygen concentration perception, cough, itch, and inner ear function	No	ANK,Ion-Tran	coiled coil		TMEM100, EGLN1	3J9P		720	961	241	Yes	913	961	5	5	5|6	7	6	720	956	T:720-740,T:765-785,T:804-824,T:830-850,T:874-894,I:902-922,T:935-956	https://www.ncbi.nlm.nih.gov/pmc/articles/PMC6038138/	874	894	935	956
P48995	Short transient receptor potential channel 1	TRPC1 (TRP1)	Tbio	793	TRP	VGIC		TRP	TRPC	pore-forming	non-selective cation(*)	ligand-gated(*)	PMID: 15016832	Thought to form a receptor-activated non-selective calcium permeant cation channel.	No	ANK,TRP, Ion-Tran	no		ITPR3, MX1, RNF24, FKBP4, PLSCR1		AF-P48995-F1	387	637	250	Yes			6	6	5|6	6	6	387	637	T:387-407,T:416-436,T:458-475,T:540-560,T:587-607,T:617-637	https://www.ncbi.nlm.nih.gov/pmc/articles/PMC6038138/	587	607	617	637
Q13507	Short transient receptor potential channel 3	TRPC3 (TRP3)	Tchem	921	TRP	VGIC		TRP	TRPC	pore-forming	non-selective cation(*)	ligand-gated(*)	PubMed:29700422, PubMed:30139744, PubMed:29726814, PubMed:35051376	Thought to form a receptor-activated non-selective calcium permeant cation channel.	No	ANK,TRP, Ion-Tran	no		ITPR1, ITPR3, MX1, RNF24, JPH2	6DJS		460	739	345	Yes	37	805	8	8	5|6	6	6	460	739	T:460-477,T:509-527,T:541-562,T:607-630,T:650-673,T:714-739	https://www.ncbi.nlm.nih.gov/pmc/articles/PMC6038138/	650	673	714	739
Q9UBN4	Short transient receptor potential channel 4	TRPC4	Tchem	977	TRP	VGIC		TRP	TRPC	pore-forming	non-selective cation(*)	ligand-gated(*)	PMID: 11042129	Forms a receptor-activated non-selective calcium permeant cation channel. Acts as a cell-cell contact-dependent endothelial calcium entry channel.	No	ANK,TRP, Ion-Tran	CIRB, spectrin-binding, coiled coil		ITPR1, ITPR2, ITPR3, NHERF1, MX1, RNF24, SESTD1, CDH5, CTNNB1, SPTAN1, EPB41L2, PLSCR1		AF-Q9UBN4-F1	330	620	290	Yes			8	8	5|6	6	6	330	620	T:330-350,T:363-383,T:437-457,T:470-490,T:512-532,T:600-620	https://www.ncbi.nlm.nih.gov/pmc/articles/PMC6038138/	512	532	600	620
Q9UL62	Short transient receptor potential channel 5	TRPC5 (TRP5)	Tchem	973	TRP	VGIC		TRP	TRPC	pore-forming	non-selective cation(*)	ligand-gated	PMID: 16284075	Thought to form a receptor-activated non-selective calcium permeant cation channel.	No	ANK,TRP, Ion-Tran	no		NHERF1, MX1, RNF24, SESTD1, CABP1, PLSCR1	6YSN / 7E4T		331	624	293	Yes	34	901	7	7	5|6	6	6	331	624	T:331-351,T:399-419,T:438-458,T:471-491,T:513-533,T:604-624	https://www.ncbi.nlm.nih.gov/pmc/articles/PMC6038138/	513	533	604	624
Q9Y210	Short transient receptor potential channel 6	TRPC6 (TRP6)	Tchem	931	TRP	VGIC		TRP	TRPC	pore-forming	non-selective cation(*)	ligand-gated	PubMed:19936226, PubMed:23291369	Thought to form a receptor-activated non-selective calcium permeant cation channel	No	ANK,TRP, Ion-Tran	no		MX1, RNF24	5YX9		439	728	289	Yes	683	728	6	6	5|6	6	6	439	727	T:439-459,T:488-508,T:522-542,T:593-613,T:637-657,T:707-727	https://www.ncbi.nlm.nih.gov/pmc/articles/PMC6038138/	637	657	707	727
Q9HCX4	Short transient receptor potential channel 7	TRPC7 (TRP7)	Tchem	862	TRP	VGIC		TRP	TRPC	pore-forming	non-selective cation(*)	voltage-gated, pH sensitive(*)	PMID: 21402151, PMID: 15579537	Thought to form a receptor-activated non-selective calcium permeant cation channel.	No	ANK,TRP, Ion-Tran	no		MX1, RNF24, PRKG1		AF-Q9HCX4-F1	352	672	320	Yes			5	5	5|6	6	6	352	672	T:352-372,T:384-404,T:466-486,T:538-558,T:582-602,T:652-672	https://www.ncbi.nlm.nih.gov/pmc/articles/PMC6038138/	582	602	652	672
Q7Z4N2	Transient receptor potential cation channel subfamily M member 1	TRPM1 (LTRPC1, MLSN, MLSN1)	Tchem	1603	TRP	VGIC		TRP	TRPM	pore-forming	non-selective cation(*)	voltage-gated(*)	PubMed:19436059, PubMed:21278253	Forms nonselective divalent cation-conducting channels which mediate the influx of Na2+, Ca2+, Mg2+, Mn2+, Ba2+, and Ni2+ into the cytoplasm, leading to membrane depolarization	No	TRPM, Ion-Tran	no				AF-Q7Z4N2-F1	831	1126	295	Yes			6	6	5|6	6	6	831	1126	T:831-851,T:898-918,T:929-949,T:962-982,T:1055-1075,T:1106-1126	https://scholar.google.com/scholar?hl=en&as_sdt=0%2C11&q=Identification+and+characterization+of+MTR1%2C+a+novel+gene+with+homology+to+melastatin+%28MLSN1%29+and+the+trp+gene+family+located+in+the+BWS-WT2+critical+region+on+chromosome+11p15.5+and+showing+allele-specific+expression+dirk+praq&btnG=	1055	1075	1106	1126
O94759	Transient receptor potential cation channel subfamily M member 2	TRPM2 (EREG1, KNP3, LTRPC2, TRPC7)	Tchem	1503	TRP	VGIC		TRP	TRPM	pore-forming	non-selective cation(*)	ligand-gated	PubMed:11960981, PubMed:12594222, PubMed:11385575, PubMed:11509734, PubMed:11804595, PubMed:15561722, PubMed:16601673, PubMed:19171771, PubMed:20660597, PubMed:25620041, PubMed:27383051, PubMed:27068538, PubMed:28775320, PubMed:29745897, PubMed:30467180	Nonselective, voltage-independent cation channel that mediates Na+ and Ca2+ influx, leading to increased cytoplasmic Ca2+ levels	No	Ion-Tran	nudix			6MJ2		753	1098	345	Yes	979	1045	6	6	5|6	9	6	753	1098	I:753-769,T:796-816,T:828-848,T:868-888,T:897-917,T:930-950,I:971-985,T:1023-1044,I:1080-1098	https://www.ncbi.nlm.nih.gov/pmc/articles/PMC6038138/	930	950	1023	1044
Q9HCF6	Transient receptor potential cation channel subfamily M member 3	TRPM3 (KIAA1616, LTRPC3)	Tchem	1732	TRP	VGIC		TRP	TRPM	pore-forming	calcium, zinc	volume-gated, temperature sensitive	PMID: 12672799, PMID: 27227024	Calcium channel mediating constitutive calcium ion entry	No	Ion_trans_dom	TRPM_tetra				AF-Q9HCF6-F1	4	1137	1133	Yes			7	7		7	7	4	1137	T:4-24,T:795-815,T:898-918,T:965-985,T:996-1016,T:1029-1049,T:1117-1137	https://www.frontiersin.org/articles/10.3389/fcell.2021.635659/full
Q8TD43	Transient receptor potential cation channel subfamily M member 4	TRPM4 (LTRPC4)	Tchem	1214	TRP	VGIC		TRP	TRPM	pore-forming	non-selective cation	voltage-gated(*)	PubMed:15331675, PubMed:29211723	Calcium-activated non selective (CAN) cation channel that mediates membrane depolarization	No	TRP, Ion-Tran	coiled coil			5WP6		783	1044	261	Yes	974	1044	5	5	5|6	7	6	783	1040	T:783-803,T:815-835,T:864-884,T:887-910,T:931-951,I:964-984,T:1020-1040	https://www.pnas.org/doi/full/10.1073/pnas.222425399	931	951	1020	1040
Q9NZQ8	Transient receptor potential cation channel subfamily M member 5	TRPM5 (LTRPC5, MTR1)	Tchem	1165	TRP	VGIC		TRP	TRPM	pore-forming	non-selective cation	voltage-gated, ligand-gated(*)	PMID: 14634208	Voltage-modulated Ca2+-activated, monovalent cation channel (VCAM) that mediates a transient membrane depolarization and plays a central role in taste transduction	No	Ion-Tran	coiled coil				AF-Q9NZQ8-F1	647	975	328	Yes			5	5	5|6	6	6	647	975	T:647-667,T:734-754,T:812-832,T:836-856,T:873-893,T:955-975	https://www.ncbi.nlm.nih.gov/pmc/articles/PMC6038138/	955	975
Q9BX84	Transient receptor potential cation channel subfamily M member 6	TRPM6 (CHAK2)	Tchem	2022	TRP	VGIC		TRP	TRPM	pore-forming	non-selective cation(*)	voltage-gated(outward rectifier)(*)	PMID: 14976260, PMID: 17904584	Essential ion channel and serine/threonine-protein kinase. Crucial for magnesium homeostasis.	No	TRP, Ion-Tran	alpha_kinase		RACK1		AF-Q9BX84-F1	742	1068	326	Yes			6	6	5|6	7	6	742	1068	T:742-762,T:842-862,T:906-926,T:940-960,T:973-993,I:1013-1033,T:1048-1068	https://www.ncbi.nlm.nih.gov/pmc/articles/PMC6038138/	973	993	1048	1068
Q96QT4	Transient receptor potential cation channel subfamily M member 7	TRPM7 (CHAK1, LTRPC7)	Tchem	1865	TRP	VGIC		TRP	TRPM	pore-forming	magnesium	ligand-gated	PubMed:35561741, PMID: 35389104	Essential ion channel and serine/threonine-protein kinase. Divalent cation channel permeable to calcium and magnesium.	No	TRP, Ion-Tran	alpha_kinase		PLCB1		AF-Q96QT4-F1	756	1095	339	Yes			6	6	5|6	7	6	756	1095	T:756-776,T:856-876,T:919-939,T:963-983,T:996-1016,I:1036-1056,T:1075-1095	https://www.ncbi.nlm.nih.gov/pmc/articles/PMC6038138/	996	1016	1075	1095
Q7Z2W7	Transient receptor potential cation channel subfamily M member 8	TRPM8 (LTRPC6, TRPP8)	Tclin	1104	TRP	VGIC		TRP	TRPM	pore-forming	non-selective cation(*)	voltage-gated, temperature sensitive, pH sensitive	PubMed:25559186, PMID: 33147416	Receptor-activated non-selective cation channel involved in detection of sensations such as coolness, by being activated by cold temperature below 25 degrees Celsius. Activated by icilin, eucalyptol, menthol, cold and modulation of intracellular pH.	No	TRPM, Ion-Tran	coiled coil		TCAF1, TCAF2 , TRPM8		AF-Q7Z2W7-F1	692	979	287	Yes			8	8	5|6	6	6	692	979	T:692-712,T:735-755,T:760-780,T:795-815,T:830-850,T:959-979	https://www.ncbi.nlm.nih.gov/pmc/articles/PMC6038138/	830	850	959	979
Q8NER1	Transient receptor potential cation channel subfamily V member 1	TRPV1 (VR1)	Tclin	839	TRP	VGIC		TRP	TRPV	pore-forming	non-selective cation	ligand-gated	PMID: 12077606	Ligand-activated non-selective calcium permeant cation channel involved in detection of noxious chemical and thermal stimuli.	No	ANK,TRP, Ion-Tran	AD		CALM, PRKCM, CSK, PRKCG, NTRK1, TMEM100, PACS2	6L93		251	687	436	Yes	251	351	6	6	5|6	6	6	434	687	T:434-454,T:472-497,T:511-531,T:536-556,T:572-599,T:659-687	https://www.pnas.org/doi/full/10.1073/pnas.222425399	572	599	659	687
Q9Y5S1	Transient receptor potential cation channel subfamily V member 2	TRPV2 (VRL)	Tchem	764	TRP	VGIC		TRP	TRPV	pore-forming	non-selective cation	voltage-gated(outward recitfier)(*)	PMID: 10201375	Calcium-permeable, non-selective cation channel with an outward rectification.	No	ANK,TRP, Ion-Tran	no		ACBD3, SLC50A1	2F37		208	642	434	Yes	208	253	6	6	5|6	7	6	391	642	T:391-411,T:435-455,T:472-492,T:494-514,T:538-558,I:572-609,T:622-642	https://www.ncbi.nlm.nih.gov/pmc/articles/PMC6038138/	538	558	622	642
Q8NET8	Transient receptor potential cation channel subfamily V member 3	TRPV3	Tchem	790	TRP	VGIC		TRP	TRPV	pore-forming	non-selective cation	ligand-gated(outward rectifier), temperature-sensitive	PMID: 12077604, PMID: 32572254	Putative receptor-activated non-selective calcium permeant cation channel. It is activated by innocuous (warm) temperatures and shows an increased response at noxious temperatures greater than 39 degrees Celsius.	No	ANK,TRP, Ion-Tran	no			6UW9		179	750	571	Yes	179	750	6	6	5|6	7	6	440	670	T:440-460,T:488-508,T:524-544,T:546-566,T:590-610,I:621-637,T:650-670	https://www.nature.com/articles/s41594-018-0108-7.epdf?author_access_token=n1OFXVuSkBMeEDxIk99Ek9RgN0jAjWel9jnR3ZoTv0MpaagAw6dM85YRgP_ltIrNWtLVQjv4ejMFWR_tVwDcTWesY5PswqksRsA9s7P6l35VINpWAemkU3Z21mSaYEbYv3Ftt6Fw7z8Cb7ZhTLrYCw%3D%3D	590	610	650	670
Q9HBA0	Transient receptor potential cation channel subfamily V member 4	TRPV4 (VRL2, VROAC)	Tchem	871	TRP	VGIC		TRP	TRPV	pore-forming	non-selective cation(*)	ligand-gated, voltage-gated, mechanosensitive, temperature-sensitive	PubMed:18826956, PubMed:18695040, PubMed:29899501, PMID: 14707014	Non-selective calcium permeant cation channel involved in osmotic sensitivity and mechanosensitivity. Activation by exposure to hypotonicity within the physiological range exhibits an outward rectification	No	ANK, Ion-Tran	no		LYN, SRC, FYN, HCK, LCK, YES, CTNNB1, PACSIN1, PACSIN2, PACSIN3, MLC1, AQP4, HEPACAM, ATP1B1, ITPR3, ANO1, PKD2, DDX3X	7AA5		470	722	252	Yes	647	719	6	6	5|6	7	6	470	722	T:470-490,T:508-534,T:548-568,T:573-593,T:609-636,I:666-685,T:694-722	https://link.springer.com/chapter/10.1007/978-3-642-54215-2_12	609	636	694	722
Q9NQA5	Transient receptor potential cation channel subfamily V member 5	TRPV5 (ECAC1)	Tchem	729	TRP	VGIC		TRP	TRPV	pore-forming	calcium	voltage-gated, pH sensitive(*)	PubMed:11549322, PubMed:18768590, PMID: 30975749	Constitutively active calcium selective cation channel thought to be involved in Ca2+ reabsorption in kidney and intestine	No	ANK,TRP, Ion-Tran	no		S100A10, BSPRY	5OEO		328	676	348	Yes	4	676	7	7	5|6	7	6	328	577	T:328-348,T:386-408,T:420-442,T:449-469,T:493-513,I:524-544,T:557-577	https://elifesciences.org/articles/49572	493	513	557	577
Q9H1D0	Transient receptor potential cation channel subfamily V member 6	TRPV6 (ECAC2)	Tchem	765	TRP	VGIC		TRP	TRPV	pore-forming	calcium	voltage-gated(*)	PubMed:15184369	Calcium selective cation channel that mediates Ca2+ uptake in various tissues, including the intestine	No	ANK,TRP, Ion-Tran	no		S100A10, TCAF1, TCAF2	6D7T		326	617	291	Yes	326	578	7	7	5|6	7	6	368	617	T:368-388,T:426-448,T:464-483,T:490-509,T:530-552,I:566-585,T:597-617	https://www.nature.com/articles/nature17975	530	552	597	617
Q9GZU1	Mucolipin-1	MCOLN1 (ML4, TRPML1)	Tchem	580	TRP	VGIC		TRP	TRPML	pore-forming	non-selective cation(*)	ligand-gated, pH-sensitive	PubMed:28112729, PubMed:29019983, PMID: 35131932	Nonselective cation channel probably playing a role in the regulation of membrane trafficking events and of metal homeostasis	No	PKD	no		PDCD6, TMEM163, LAPTM4B	6E7Z		66	518	452	Yes	469	518	5	5	5|6	7	6	66	513	T:66-86,T:299-321,T:351-371,T:383-405,T:428-448,I:457-477,T:492-513	https://onlinelibrary.wiley.com/doi/full/10.1002/ajmg.a.61575	428	448	492	513
Q8IZK6	Mucolipin-2	MCOLN2	Tchem	566	TRP	VGIC		TRP	TRPML	pore-forming	non-selective cation	voltage-gated(inward rectifier), pH sensitive, mechanosensitive	PubMed:19940139, PubMed:19885840, PMID: 34915027	Nonselective cation channel probably playing a role in the regulation of membrane trafficking events. Acts as Ca2+-permeable cation channel with inwardly rectifying activity	No	PKD	no		TMEM176A	6HRS		66	502	436	Yes	87	99	5	5	5|6	7	6	66	502	T:66-86,T:289-309,T:347-367,T:377-397,T:420-440,I:449-469,T:481-502	https://journals.asm.org/doi/full/10.1128/mbio.02314-17	420	440	481	502
Q8TDD5	Mucolipin-3	MCOLN3	Tchem	553	TRP	VGIC		TRP	TRPML	pore-forming	calcium, non-selective cation	ligand-gated(*)	PubMed:18369318, PubMed:19497048, PubMed:19522758, PubMed:19885840, PubMed:29106414	Nonselective ligand-gated cation channel probably playing a role in the regulation of membrane trafficking events. Acts as Ca2+-permeable cation channel with inwardly rectifying activity	No	PKD	no		GABARAPL2	6AYG		63	497	434	Yes			5	5	5|6	7	6	63	497	T:63-83,T:284-304,T:342-362,T:372-392,T:415-435,I:444-464,T:476-497	https://www.pnas.org/doi/full/10.1073/pnas.222425399	415	435	476	497
P98161	Polycystin-1	PKD1	Tbio	4303	TRP	VGIC		TRP	TRPP	pore-forming	calcium(*)	mechanosensitive(*)	PubMed:30093605, PMID: 12514735	Component of a heteromeric calcium-permeable ion channel formed by PKD1 and PKD2 that is activated by interaction between PKD1 and a Wnt family member, such as WNT3A and WNT9B	No	PKD	coiled coil, lectin, GPS		PKD2L1, PRKX, WNT3A, WNT4, WNT5A, WNT9B, DVL1, DVL2, NPHP1, BBS1, BBS4, BBS5, TTC8, RGS7	6A70		3075	4110	1035	Yes	267	4099	10	10	5|6	11	11	3075	4110	T:3075-3095,T:3278-3298,T:3324-3344,T:3560-3580,T:3583-3603,T:3666-3686,T:3902-3922,T:3936-3956,T:3985-4005,T:4028-4048,T:4091-4110	https://www.ncbi.nlm.nih.gov/pmc/articles/PMC6038138/	3583	3603	3666	3686
Q8TDX9	Polycystic kidney disease protein 1-like 1	PKD1L1	Tbio	2849	TRP	VGIC		TRP	TRPP	auxiliary			PMID: 24336289	Component of a ciliary calcium channel that controls calcium concentration within primary cilia without affecting cytoplasmic calcium concentration.	Yes		PLAT, GPS, Ig-like_dom				none				Yes			12	12		11	11	1749	2732	T:1749-1769,T:1957-1977,T:1993-2013,T:2136-2156,T:2175-2195,T:2282-2302,T:2523-2543,T:2563-2583,T:2617-2637,T:2647-2667,T:2712-2732
Q7Z442	Polycystic kidney disease protein 1-like 2	PKD1L2 (KIAA1879, PC1L2)	Tbio	2459	TRP	VGIC		TRP	TRPP	pore-forming	non-selective cation(*)	voltage-gated(*)	PMID: 15203210, PMID: 31315976	May function as an ion-channel regulator. May function as a G-protein-coupled receptor.	No	PKD, PLAT	GPS, lectin, REJ		GNAS, GNAI1		AF-Q7Z442-F1	1345	2398	1053	Yes			11	11	10|11	12	12	1345	2398	T:1345-1365,T:1553-1573,T:1595-1615,T:1819-1839,T:1866-1886,T:1944-1964,T:2144-2166,T:2183-2203,T:2219-2239,T:2271-2291,T:2313-2333,T:2378-2398	https://www.nejm.org/doi/full/10.1056/nejmra022161
Q7Z443	Polycystic kidney disease protein 1-like 3	PKD1L3	Tbio	1732	TRP	VGIC		TRP	TRPP	pore-forming	cation	voltage-gated, proton-gated	PMID: 23212381, PMID: 18388856	Component of a calcium channel. May act as a sour taste receptor by forming a calcium channel with PKD1L3 in gustatory cells; however, its contribution to sour taste perception is unclear in vivo and may be indirect.	No	PKD, PLAT	GPS, lectin				AF-Q7Z443-F1	698	1690	992	Yes			11	11	5|6	12	12	698	1679	T:698-718,T:906-926,T:940-960,T:1155-1175,T:1199-1219,T:1281-1301,T:1463-1483,T:1502-1522,T:1551-1571,T:1593-1613,T:1626-1646,T:1659-1679	https://www.ncbi.nlm.nih.gov/pmc/articles/PMC6038138/	2033	2053	2054	2060
Q13563	Polycystin-2	PKD2 (TRPP2)	Tchem	968	TRP	VGIC		TRP	TRPP	pore-forming	calcium	mechanosensitive	PubMed:27214281, PubMed:29899465, PMID: 12514735	Component of a heteromeric calcium-permeable ion channel formed by PKD1 and PKD2 that is activated by interaction between PKD1 and a Wnt family member, such as WNT3A and WNT9B	No	PKD	coiled coil, EF-hand		PKD1L1, CD2AP, HAX1, NEK8, AKAP5, ADCY5, ADCY6, PDE4C, TRPV4, PACS1, PACS2, TMEM33	5MKE		220	681	461	Yes	640	681	7	7	5|6	7	6	220	675	T:220-241,T:469-489,T:506-526,T:553-573,T:598-619,I:632-646,T:655-675	https://journals.asm.org/doi/full/10.1128/mbio.02314-17	598	619	655	675
Q9P0L9	Polycystic kidney disease 2-like 1 protein	PKD2L1 (PKD2L, PKDL, TRPP3)	Tchem	805	TRP	VGIC		TRP	TRPP	pore-forming	non-selective cation(*)	voltage-gated	PubMed:10517637, PubMed:11959145, PubMed:25820328, PubMed:27754867, PubMed:29425510, PubMed:23212381, PubMed:30004384	Pore-forming subunit of a heterotetrameric, non-selective cation channel that is permeable to Ca2+	No	PKD	EF-hand, coiled coil		RACK1	6DU8		104	560	456	Yes	520	560	5	5	5|6	7	6	104	557	T:104-124,T:357-376,T:385-405,T:434-454,T:480-499,I:512-526,T:537-557	https://www.ncbi.nlm.nih.gov/pmc/articles/PMC6055481/#:~:text=PKD2%20features%20a%20large%20extracellular,assembly%20via%20extensive%20homotypic%20interactions.	480	499	537	557
Q9NZM6	Polycystic kidney disease 2-like 2 protein	PKD2L2	Tbio	624	TRP	VGIC		TRP	TRPP	pore-forming	calcium, monovalent cation(*)	voltage-gated(inward rectifier)(*)	PMID: 10756092, PMID: 30004384	May function as a subunit of a cation channel and play a role in fertilization.	No	PKD	coiled coil				AF-Q9NZM6-F1	32	490	458	Yes			6	6	5|6	6	6	32	490	T:32-52,T:277-297,T:315-335,T:361-381,T:407-427,T:470-490	https://www.embopress.org/doi/full/10.15252/embr.201948336	407	427	470	490
P29973	cGMP-gated cation channel alpha-1	CNGA1 (CNCG, CNCG1)	Tchem	686	CNG	VGIC	CnGCC	CNG	CNGA	pore-forming	non-selective cation(*)	voltage-gated(GMP)(*)	PMID: 1379636	Subunit of the rod cyclic GMP-gated cation channel, which is involved in the final stage of the phototransduction pathway.	No	CLZ	cNMP			7LFW		161	515	354	Yes	180	515	2	2	5|6	6	6	161	397	T:161-181,T:195-213,T:236-255,T:263-284,T:296-322,T:366-397	https://sciencedirect.com/science/article/pii/S0042698997004094#:~:text=The%20cGMP-gated%20channel%20of%20the%20rod%20photoreceptor%20cell%20plays,designated%20as%20%CE%B1%20and%20%CE%B2.	296	322	366	397
Q16280	Cyclic nucleotide-gated olfactory channel	CNGA2 (CNCA, CNCA1, CNCG2)	Tchem	664	CNG	VGIC	CnGCC	CNG	CNGA	pore-forming	non-selective cation(*)	voltage-gated(cyclic nucleotide)	PMID: 7522482	The olfactory channel can be shown to be activated by cyclic nucleotides which leads to a depolarization of olfactory sensory neurons.	No	CLZ	cNMP				AF-Q16280-F1	139	474	335	Yes			4	4	5|6	6	6	139	474	T:139-159,T:172-192,T:225-245,T:275-295,T:351-371,T:454-474	https://www.nature.com/articles/s41467-018-06414-8	351	371	454	474
Q16281	Cyclic nucleotide-gated cation channel alpha-3	CNGA3 (CNCG3)	Tchem	694	CNG	VGIC	CnGCC	CNG	CNGA	pore-forming	non-selective cation(*)	voltage-gated(cyclic nucleotide)(*)	PMID: 21878911	Visual signal transduction is mediated by a G-protein coupled cascade using cGMP as second messenger.	No	CLZ	cNMP			7RHS		163	502	339	Yes	163	500	2	2	5|6	6	6	167	502	T:167-187,T:200-220,T:253-273,T:303-323,T:379-399,T:482-502	https://journals.physiology.org/doi/full/10.1152/physrev.00008.2002	379	399	482	502
Q8IV77	Cyclic nucleotide-gated cation channel alpha-4	CNGA4	Tbio	575	CNG	VGIC	CnGCC	CNG	CNGA	pore-forming	non-selective cation(*)	voltage-gated(cyclic nucleotide)	PMID: 17032767, PMID: 7542935	Second messenger, cAMP, causes the opening of cation-selective cyclic nucleotide-gated (CNG) channels and depolarization of the neuron (olfactory sensory neurons, OSNs).	No	CLZ	cNMP				AF-Q8IV77-F1	34	265	231	Yes			3	3	5|6	6	6	34	265	T:34-54,T:66-86,T:113-133,T:169-189,T:218-234,T:245-265	https://journals.physiology.org/doi/full/10.1152/physrev.00008.2002	218	234	245	265
Q14028	Cyclic nucleotide-gated cation channel beta-1	CNGB1 (CNCG2, CNCG3L, CNCG4, RCNC2)	Tbio	1251	CNG	VGIC	CnGCC	CNG	CNGB	pore-forming	non-selective cation(*)	voltage-gated(cyclic nucleotide, auxiliary)(*)	PMID: 12467592, PMID: 12467592	Subunit of cyclic nucleotide-gated (CNG) channels, nonselective cation channels, which play important roles in both visual and olfactory signal transduction.	No		cNMP			7RHK		657	982	407	Yes	159	1064	0	0	5|6	6	6	657	982	T:657-675,T:690-708,T:734-753,T:791-813,T:858-877,T:962-982	https://www.pnas.org/doi/full/10.1073/pnas.1700248114	858	877	962	982
Q9NQW8	Cyclic nucleotide-gated cation channel beta-3 ·	CNGB3	Tchem	809	CNG	VGIC	CnGCC	CNG	CNGB	pore-forming	non-selective cation(*)	voltage-gated(cyclic nucleotide, auxiliary)(*)	PMID: 21878911, PMID: 12467592	Visual signal transduction is mediated by a G-protein coupled cascade using cGMP as second messenger.	No		cNMP			7RHS		163	525	362	Yes	163	500	4	4	5|6	6	6	217	525	T:217-237,T:251-271,T:303-323,T:360-380,T:418-438,T:505-525	https://journals.physiology.org/doi/full/10.1152/physrev.00008.2002	418	438	505	525
O60741	Potassium/sodium hyperpolarization-activated cyclic nucleotide-gated channel 1	HCN1 (BCNG1)	Tclin	890	HCN	VGIC	CnGCC	HCN		pore-forming	potassium/sodium	voltage-gated	PMID: 28086084	Hyperpolarization-activated ion channel exhibiting weak selectivity for potassium over sodium ions	No	Ion_Tran	voltage-sensor, cNMP-bd		KCNE2, CSK	6UQG		137	449	312	Yes	137	449	2	2	5|6	7	6	143	392	T:143-164,T:174-194,T:216-236,T:261-281,T:296-318,I:345-366,T:372-392	https://www.sciencedirect.com/science/article/pii/S1050173802001627	296	318	372	392
Q9UL51	Potassium/sodium hyperpolarization-activated cyclic nucleotide-gated channel 2	HCN2 (BCNG2)	Tclin	889	HCN	VGIC	CnGCC	HCN		pore-forming	potassium/sodium(*)	voltage-gated	PMID: 22006928	Hyperpolarization-activated ion channel exhibiting weak selectivity for potassium over sodium ions	No	Ion_Tran	voltage-sensor, cNMP-bd	PEX5L	KCNE2	2MPF		216	652	436	Yes	542	652	2	2	5|6	7	6	216	461	T:216-236,T:241-261,T:289-309,T:318-338,T:370-390,I:414-435,T:441-461	https://www.cell.com/biophysj/pdf/S0006-3495(05)72744-2.pdf	370	390	441	461
Q9P1Z3	Potassium/sodium hyperpolarization-activated cyclic nucleotide-gated channel 3	HCN3 (KIAA1535)	Tclin	774	HCN	VGIC	CnGCC	HCN		pore-forming	potassium	voltage-gated	PMID: 16043489	Hyperpolarization-activated ion channel exhibiting weak selectivity for potassium over sodium ions	No	Ion_Tran	voltage-sensor, cNMP-bd		KCTD3, PEX5L		AF-Q9P1Z3-F1	98	441	343	Yes			1	1	5|6	7	6	98	350	T:98-118,T:125-145,T:172-192,T:202-222,T:254-274,I:298-319,T:330-350	https://www.sciencedirect.com/science/article/pii/S017616171930152X	338	370	390	441
Q9Y3Q4	Potassium/sodium hyperpolarization-activated cyclic nucleotide-gated channel 4	HCN4	Tclin	1203	HCN	VGIC	CnGCC	HCN		pore-forming	potassium/sodium(*)	voltage-gated	PMID: 10228147	Hyperpolarization-activated ion channel exhibiting weak selectivity for potassium over sodium ions	No	Ion_Tran	voltage-sensor, cNMP-bd			6GYN		267	518	251	Yes	478	518	2	2	5|6	7	6	267	517	T:267-287,T:294-314,T:341-361,T:369-389,T:421-441,I:465-486,T:497-517	https://journals.physiology.org/doi/full/10.1152/ajpcell.00154.2008	421	441	497	517
Q8NEC5	Cation channel sperm-associated protein 1	CATSPER1	Tchem	780	CatSper	VGIC		CatSper		pore-forming	calcium	voltage-gated	PMID: 21412339	Voltage-gated calcium channel that plays a central role in calcium-dependent physiological responses essential for successful fertilization, such as sperm hyperactivation, acrosome reaction and chemotaxis towards the oocyte.	No	CatSper, Ion_Tran	no		HSPA1, CACNA1I		AF-Q8NEC5-F1	448	671	223	Yes			5	5	5|6	7	6	448	671	T:448-469,T:479-500,T:509-531,T:541-563,T:582-604,I:616-628,T:646-671	https://www.nature.com/articles/s41586-021-03742-6	448	469	479	500	509	531	541	563
Q96P56	Cation channel sperm-associated protein 2	CATSPER2	Tchem	530	CatSper	VGIC		CatSper		pore-forming	calcium	voltage-gated(*)	PMID: 21412339	Voltage-gated calcium channel that plays a central role in calcium-dependent physiological responses essential for successful fertilization, such as sperm hyperactivation, acrosome reaction and chemotaxis towards the oocyte.	No	CatSper, Ion_Tran	no	CATSPERB, CATSPERG, CATSPERD, CATSPERE, CATSPERZ, C2CD6/CATSPERT, TMEM249, TMEM262, EFCAB9	HSPA1, CACNA1I		AF-Q96P56-F1	109	341	232	Yes			6	6	5|6	7	6	109	341	T:109-131,T:141-166,T:176-200,T:204-222,T:240-262,I:282-294,T:315-341	https://www.nature.com/articles/s41586-021-03742-6	109	131	141	166	176	200	204	222
Q86XQ3	Cation channel sperm-associated protein 3	CATSPER3	Tchem	398	CatSper	VGIC		CatSper		pore-forming	calcium	voltage-gated(*)	PMID: 21412339	Voltage-gated calcium channel that plays a central role in calcium-dependent physiological responses essential for successful fertilization, such as sperm hyperactivation, acrosome reaction and chemotaxis towards the oocyte.	No	CatSper, Ion_Tran	no	CATSPERB, CATSPERG, CATSPERD, CATSPERE, CATSPERZ, C2CD6/CATSPERT, TMEM249, TMEM262, EFCAB9	HSPA1		AF-Q86XQ3-F1	49	268	219	Yes			5	5	5|6	7	6	49	268	T:49-71,T:81-107,T:109-131,T:144-160,T:169-195,I:217-236,T:243-268	https://www.nature.com/articles/s41586-021-03742-6	169	195	243	268
Q7RTX7	Cation channel sperm-associated protein 4	CATSPER4	Tchem	472	CatSper	VGIC		CatSper		pore-forming	calcium	voltage-gated(*)	PMID: 21412339	Voltage-gated calcium channel that plays a central role in calcium-dependent physiological responses essential for successful fertilization, such as sperm hyperactivation, acrosome reaction and chemotaxis towards the oocyte.	No	CatSper, Ion_Tran	no	CATSPERB, CATSPERG, CATSPERD, CATSPERE, CATSPERZ, C2CD6/CATSPERT, TMEM249, TMEM262, EFCAB9			AF-Q7RTX7-F1	91	307	216	Yes			6	6	5|6	7	6	91	307	T:91-112,T:123-149,T:154-177,T:181-199,T:213-236,I:247-258,T:280-307	https://www.nature.com/articles/s41586-021-03742-6	213	236	280	307
Q9ULQ1	Two pore channel protein 1	TPCN1 (KIAA1169, TPC1)	Tchem	816	TPC	VGIC		TPC		pore-forming	sodium	voltage-gated	PubMed:23394946	Intracellular channel initially characterized as a non-selective Ca2+-permeable channel activated by NAADP (nicotinic acid adenine dinucleotide phosphate), it is also a highly-selective Na+ channel activated directly by PI(3,5)P2 (phosphatidylinositol 3,5-bisphosphate)	No	Ion-Tran	voltage sensing		STX7, STX8, STX12, MTOR, LSM12, JPT2		AF-Q9ULQ1-F1	113	691	578	Yes			12	12	5|6 11|12	14	12	113	691	T:113-133,T:135-155,T:178-198,T:201-220,T:235-255,I:263-286,T:295-315,T:445-465,T:480-500,T:504-526,T:535-549,T:574-594,I:630-653,T:671-691	https://www.ncbi.nlm.nih.gov/pmc/articles/PMC5745306/	235	255	295	315	574	594	671	691
Q8NHX9	Two pore channel protein 2	TPCN2 (TPC2)	Tchem	752	TPC	VGIC		TPC		pore-forming	sodium, calcium	voltage-gated(*)	PubMed:19387438, PubMed:19620632, PubMed:20880839, PubMed:30860481, PubMed:32167471, PubMed:31825310, PubMed:23063126, PubMed:24776928, PubMed:23394946, PubMed:24502975	Intracellular channel initially characterized as a non-selective Ca2+-permeable channel activated by NAADP (nicotinic acid adenine dinucleotide phosphate), it is also a highly-selective Na+ channel activated directly by PI(3,5)P2 (phosphatidylinositol 3,5-bisphosphate)	No	Ion-Tran	voltage sensing		LRRK2, HAX1, MTOR, LSM12	6NQ0		85	700	653	Yes	47	700	11	11	5|6 11|12	14	12	85	694	T:85-105,T:128-148,T:156-176,T:184-204,T:219-239,I:255-279,T:290-310,T:437-459,T:466-486,T:503-523,T:555-575,T:581-601,I:636-658,T:674-694	https://www.ncbi.nlm.nih.gov/pmc/articles/PMC5745306/	219	239	290	310	581	601	674	694
Q96D96	Voltage-gated hydrogen channel 1	HVCN1 (VSOP)	Tchem	273	HV1	VGIC		HV1		pore-forming	proton	voltage-gated	PMID: 20147290	Mediates the voltage-dependent proton permeability of excitable membranes.	No	VGPC1, Ion_Tran	voltage-sensor			3A2A		101	218	117	Yes			3	3		4	4	101	218	T:101-121,T:139-161,T:170-190,T:198-218	https://www.cell.com/neuron/pdf/S0896-6273(12)01004-5.pdf
P21817	Ryanodine receptor 1	RYR1 (RYDR)	Tclin	5038	RyR	VGIC		RyR		pore-forming	calcium(*)	voltage-gated, ligand-gated(*)	PubMed:18268335	Calcium channel that mediates the release of Ca2+ from the sarcoplasmic reticulum into the cytoplasm and thereby plays a key role in triggering muscle contraction following depolarization of T-tubules	No	MIR, SPRY	EF-hand		PDE4D, PKA, FKBP1A, PP1, CALM, S100A1 , CACNA1S, CACNB1, TRDN, ASPH, SELENON	6UHI		4560	4941	381	Yes	15	191	6	6	5|6	7	6	4560	4941	T:4560-4580,T:4642-4662,T:4781-4803,T:4805-4821,T:4837-4857,I:4881-4900,T:4921-4941	https://www.ncbi.nlm.nih.gov/pmc/articles/PMC5936639/	4837	4857	4921	4941
Q92736	Ryanodine receptor 2	RYR2	Tclin	4967	RyR	VGIC		RyR		pore-forming	calcium(*)	voltage-gated, ligand-gated(*)	PMID: 10830164	Calcium channel that mediates the release of Ca2+ from the sarcoplasmic reticulum into the cytoplasm and thereby plays a key role in triggering muscle contraction following depolarization of T-tubules	No	MIR, SPRY			FKBP1A, FKBP1B, CALM, S100A1, PKA, PP1, SELENON, PRKAR2A, AKAP6, FSD2, CMYA5	7U9R		4282	4870	588	Yes			6	6	9|10	7	6	4282	4870	T:4282-4302,T:4504-4524,T:4580-4600,T:4730-4750,T:4769-4789,I:4820-4829,T:4850-4870	https://www.sciencedirect.com/science/article/pii/S0167730606410127	4769	4789	4820	4829
Q15413	Ryanodine receptor 3	RYR3 (HBRR)	Tclin	4870	RyR	VGIC		RyR		pore-forming	calcium	voltage-gated, ligand-gated(*)	PMID: 12354756	Calcium channel that mediates the release of Ca2+ from the sarcoplasmic reticulum into the cytoplasm and thereby plays a key role in triggering muscle contraction following depolarization of T-tubules	No	MIR, SPRY	no		FKBP1A, SELENON	6UHH		4187	4773	586	Yes	872	1101	6	6	5|6	8	7	4187	4773	T:4187-4207,T:4410-4430,T:4485-4505,T:4610-4630,T:4633-4653,T:4672-4692,I:4723-4732,T:4753-4773	https://rupress.org/jgp/article/149/12/1065/43566/The-structural-basis-of-ryanodine-receptor-ion	4633	4653	4672	4692
Q8IZF0	Sodium leak channel NALCN	NALCN (VGCNL1)	Tchem	1738	NALCN	VGIC		NALCN		pore-forming	sodium	voltage-gated	PubMed:17448995	Voltage-gated ion channel responsible for the resting Na+ permeability that controls neuronal excitability (PubMed:17448995, PubMed:31409833). NALCN channel functions as a multi-protein complex, which consists at least of NALCN, NALF1, UNC79 and UNC80 (	No	Ion-Tran	voltage-sensing, coiled coil, EF-hand	UNC79, UNC80, NACL1	CHRM3	7WJI		37	1447	1410	Yes			19	19		28	24	37	1447	T:37-57,T:66-90,T:107-129,T:138-158,T:174-199,I:270-289,T:295-322,T:383-403,T:417-439,T:448-468,T:473-492,T:503-530,I:544-563,T:570-599,T:887-906,T:916-939,T:948-972,T:981-1003,T:1016-1039,I:1105-1124,T:1130-1159,T:1211-1227,T:1237-1260,T:1272-1293,T:1297-1318,T:1332-1357,I:1379-1398,T:1421-1447
B1AL88	NALCN channel auxiliary factor 1	NALF1 (FAM155A, NLF-1)	Tbio	458	NALCN	VGIC		NALCN		auxiliary			PMID: 32494638	Auxillary component of the NALCN sodium channel complex, a channel that regulates the resting membrane potential and controls neuronal excitability	Yes		no			7WJI					Yes			0	0		2	2	40	437	T:40-60,T:417-437
O75949	NALCN channel auxiliary factor 2	NALF2 (FAM155B, TED, TMEM28)	Tbio	472	NALCN	VGIC		NALCN		auxiliary			PMID: 32494638	Probable component of the NALCN channel complex, a channel that regulates the resting membrane potential and controls neuronal excitability.	Yes		no				AF-O75949-F1				Yes			0	0		2	2	47	453	T:47-67,T:433-453
B7ZAQ6	Golgi pH regulator A	GPR89A (GPHRA, GPR89, SH120)	Tbio	455	GPHR	VGIC		GPHR		pore-forming	anion(*)	voltage-gated(*)	PubMed:12761501, PubMed:18794847	Voltage dependent anion channel required for acidification and functions of the Golgi apparatus that may function in counter-ion conductance	No	GPHR_N	ABA		RABL3, GPR89A		AF-B7ZAQ6-F1	5	445	440	Yes			9	9		9	9	5	445	T:5-25,T:46-66,T:79-99,T:114-134,T:150-170,T:290-310,T:343-363,T:378-398,T:425-445
P0CG08	Golgi pH regulator B	GPR89B (GPHRB, GPR89C)	Tbio	455	GPHR	VGIC		GPHR		pore-forming	anion(*)	voltage-gated(*)	PubMed:18794847	Voltage dependent anion channel required for acidification and functions of the Golgi apparatus that may function in counter-ion conductance	No	GPHR_N	ABA		RABL3		AF-P0CG08-F1	5	445	440	Yes			9	9		9	9	5	445	T:5-25,T:46-66,T:79-99,T:114-134,T:150-170,T:290-310,T:343-363,T:378-398,T:425-445
Q9Y342	Plasmolipin	PLLP (PMLP, TM4SF11)	Tbio	182	PLLP	VGIC		PLLP		pore-forming	potassium(*)	probable voltage-gated(*)	By similarity	Appears to be involved in myelination. Could also participate in ion transport events as addition of plasmolipin to lipid bilayers induces the formation of ion channels, which are voltage-dependent and K+-selective (By similarity).	No		MARVEL				AF-Q9Y342-F1	36	162	126	Yes			4	4		4	4	36	162	T:36-56,T:69-89,T:100-120,T:142-162
O00555	Voltage-dependent P/Q-type calcium channel subunit alpha-1A	CACNA1A (CACH4, CACN3, CACNL1A4)	Tchem	2506	Ca_V	VGIC		Cav		pore-forming	calcium(*)	voltage-gated(*)	PMID: 31071485	Voltage-sensitive calcium channels (VSCC) mediate the entry of calcium ions into excitable cells and are also involved in a variety of calcium-dependent processes, including muscle contraction, hormone or neurotransmitter release, gene expression, cell motility, cell division and cell death.	No	GPHH, CACHANNEL	voltage-sensor		CALM2, CALM3	3BXK		63	1955	1892	Yes	63	1955	17	17	5|6 (4 subunits)	24	24	99	1806	T:99-117,T:136-155,T:168-185,T:191-209,T:229-248,T:336-360,T:487-505,T:521-540,T:549-567,T:578-596,T:616-635,T:689-713,T:1242-1260,T:1277-1296,T:1309-1327,T:1339-1357,T:1377-1396,T:1484-1508,T:1564-1592,T:1598-1617,T:1626-1644,T:1652-1670,T:1690-1709,T:1782-1806	https://www.ncbi.nlm.nih.gov/pmc/articles/PMC3140680/	191	229	248	336	578	616	635	689	1339	1377	1396	1484	1652
Q00975	Voltage-dependent N-type calcium channel subunit alpha-1B	CACNA1B (CACH5, CACNL1A5)	Tclin	2339	Ca_V	VGIC		Cav		pore-forming	calcium(*)	voltage-gated(*)	PMID: 31071485	Voltage-sensitive calcium channels (VSCC) mediate the entry of calcium ions into excitable cells and are also involved in a variety of calcium-dependent processes, including muscle contraction, hormone or neurotransmitter release, gene expression, cell motility, cell division and cell death.	No	GPHH, VDCC, CACHANNEL	voltage-sensor		RIMS1, FMR1	7VFW		91	1707	1616	Yes			21	21	5|6 (4 subunits)	24	24	91	1707	T:91-114,T:132-152,T:164-182,T:188-211,T:222-244,T:332-356,T:483-501,T:512-534,T:545-566,T:574-586,T:605-630,T:683-709,T:1152-1170,T:1179-1203,T:1218-1238,T:1245-1265,T:1284-1303,T:1391-1416,T:1472-1490,T:1499-1523,T:1534-1555,T:1564-1582,T:1602-1621,T:1684-1707	https://www.ncbi.nlm.nih.gov/pmc/articles/PMC3140680/	222	244	332	356	605	630	683	709	1284	1303	1391	1416	1602
Q13936	Voltage-dependent L-type calcium channel subunit alpha-1C	CACNA1C (CACH2, CACN2, CACNL1A1, CCHL1A1)	Tclin	2221	Ca_V	VGIC		Cav		pore-forming	calcium(*)	voltage-gated(*)	PMID: 31071485	Pore-forming, alpha-1C subunit of the voltage-gated calcium channel that gives rise to L-type calcium currents	No	GPHH, LVDCC, CACHANNEL	voltage-sensor, EF-hand	CACNB1, CACNB2, CACNB3, CACNA2D1, CACNA2D4, CACNG4, CACNG6, CACNG7, CACNG8	CALM1, CABP1, CABP5, CIB1, STAC2, STAC3	8FD7		125	1704	1579	Yes	155	1704	21	21	5|6 (4 subunits)	28	24	125	1524	T:125-143,T:159-179,T:189-209,T:233-251,T:269-290,I:351-372,T:381-401,T:525-543,T:555-575,T:587-606,T:616-634,T:654-673,I:694-715,T:726-745,T:901-919,T:932-952,T:988-1006,T:1014-1032,T:1052-1071,I:1122-1142,T:1160-1181,T:1240-1261,T:1270-1291,T:1302-1321,T:1373-1391,T:1410-1430,I:1453-1471,T:1500-1524	https://scholar.google.com/scholar?hl=en&as_sdt=0%2C11&q=A+Novel+Mutation+in+CACNA1S+Gene+Associated+with+Hypokalemic+Periodic+Paralysis+Which+has+a+Gender+Difference+in+the+Penetrance&btnG=	233	269	381	401	626	654	707	726	1014	1032	1136	1160	1373
Q01668	Voltage-dependent L-type calcium channel subunit alpha-1D	CACNA1D (CACH3, CACN4, CACNL1A2, CCHL1A2)	Tclin	2161	Ca_V	VGIC		Cav		pore-forming	calcium(*)	voltage-gated(*)	PMID: 31071485	Voltage-sensitive calcium channels (VSCC) mediate the entry of calcium ions into excitable cells and are also involved in a variety of calcium-dependent processes, including muscle contraction, hormone or neurotransmitter release, gene expression, cell motility, cell division and cell death.	No	GPHH, LVDCC, CACHANNEL	voltage-sensor		CABP1, CABP4, RIMBP2	8E5A		127	1464	1337	Yes	363	1406	19	19	5|6 (4 subunits)	24	24	127	1464	T:127-145,T:164-183,T:196-214,T:236-254,T:274-293,T:382-406,T:524-543,T:559-577,T:586-604,T:615-633,T:653-673,T:728-752,T:887-905,T:922-941,T:954-972,T:979-998,T:1018-1037,T:1128-1148,T:1206-1224,T:1240-1259,T:1267-1288,T:1314-1333,T:1353-1372,T:1440-1464	https://www.ncbi.nlm.nih.gov/pmc/articles/PMC3140680/	274	293	382	406	653	673	728	752	1018	1037	1128	1148	1353
Q15878	Voltage-dependent R-type calcium channel subunit alpha-1E	CACNA1E (CACH6, CACNL1A6)	Tchem	2313	Ca_V	VGIC		Cav		pore-forming	calcium(*)	voltage-gated(*)	PMID: 31071485	Voltage-sensitive calcium channels (VSCC) mediate the entry of calcium ions into excitable cells	No	GPHH, RVDCC, CACHANNEL	voltage-sensor, EF-hand		EFHC1	7XLQ		90	1699	1609	Yes	262	1680	19	19	5|6 (4 subunits)	24	24	90	1724	T:90-108,T:128-146,T:159-173,T:186-205,T:224-244,T:327-350,T:477-496,T:510-529,T:539-557,T:568-586,T:606-625,T:679-703,T:1149-1165,T:1190-1209,T:1218-1240,T:1255-1272,T:1292-1311,T:1399-1422,T:1480-1498,T:1514-1533,T:1542-1560,T:1572-1590,T:1610-1629,T:1699-1724	https://www.ncbi.nlm.nih.gov/pmc/articles/PMC3140680/	186	224	244	327	568	606	625	679	1255	1292	1311	1399	1572
O60840	Voltage-dependent L-type calcium channel subunit alpha-1F	CACNA1F (CACNAF1)	Tchem	1977	Ca_V	VGIC		Cav		pore-forming	calcium(*)	voltage-gated(*)	PMID: 31071485	Voltage-sensitive calcium channels (VSCC) mediate the entry of calcium ions into excitable cells and are also involved in a variety of calcium-dependent processes, including muscle contraction, hormone or neurotransmitter release, gene expression, cell motility, cell division and cell death.	No	GPHH, VDCC, CACHANNEL	voltage-sensor		CABP4		AF-O60840-F1	5	1819	1814	Yes	5	1819	19	19	5|6 5|6 5|6 5|6	24	24	93	1441	T:93-111,T:130-149,T:162-180,T:202-220,T:240-259,T:348-372,T:530-549,T:565-583,T:592-610,T:621-639,T:659-679,T:734-758,T:872-890,T:907-926,T:939-957,T:964-983,T:1003-1022,T:1113-1133,T:1191-1209,T:1225-1244,T:1252-1273,T:1291-1310,T:1330-1349,T:1417-1441	https://www.ncbi.nlm.nih.gov/pmc/articles/PMC3140680/	202	240	259	348	621	659	679	734	964	1003	1022	1113	1291
O43497	Voltage-dependent T-type calcium channel subunit alpha-1G	CACNA1G (KIAA1123)	Tclin	2377	Ca_V	VGIC		Cav		pore-forming	calcium(*)	voltage-gated(*)	PMID: 31071485	Voltage-sensitive calcium channels (VSCC) mediate the entry of calcium ions into excitable cells and are also involved in a variety of calcium-dependent processes, including muscle contraction, hormone or neurotransmitter release, gene expression, cell motility, cell division and cell death.	No	VDCC, CACHANNEL	voltage-sensor			6KZO		81	2320	2239	Yes	218	2320	17	17	5|6 (4 subunits)	24	24	81	1854	T:81-101,T:120-141,T:151-170,T:176-193,T:214-234,T:371-395,T:744-764,T:778-799,T:806-824,T:833-856,T:868-888,T:940-964,T:1273-1295,T:1314-1334,T:1345-1364,T:1379-1400,T:1411-1434,T:1512-1537,T:1611-1631,T:1646-1667,T:1675-1693,T:1708-1731,T:1746-1766,T:1827-1854	https://www.ncbi.nlm.nih.gov/pmc/articles/PMC3140680/	214	234	371	395	868	888	940	964	1411	1434	1512	1537	1746
O95180	Voltage-dependent T-type calcium channel subunit alpha-1H	CACNA1H	Tclin	2353	Ca_V	VGIC		Cav		pore-forming	calcium(*)	voltage-gated(*)	PMID: 31071485	Voltage-sensitive calcium channel that gives rise to T-type calcium currents.	No	VDCC	voltage-sensor		STAC		AF-O95180-F1	101	2183	2082	Yes	419	2183	15	15	5|6 5|6 5|6 5|6	24	24	101	1863	T:101-119,T:142-160,T:170-184,T:194-212,T:233-253,T:395-419,T:794-814,T:828-849,T:856-874,T:883-906,T:918-938,T:991-1015,T:1291-1313,T:1332-1352,T:1363-1382,T:1397-1418,T:1429-1452,T:1530-1555,T:1617-1637,T:1652-1673,T:1681-1699,T:1714-1737,T:1752-1772,T:1836-1863	https://www.ncbi.nlm.nih.gov/pmc/articles/PMC3140680/	233	253	395	419	918	938	991	1015	1429	1452	1530	1555	1752
Q9P0X4	Voltage-dependent T-type calcium channel subunit alpha-1I	CACNA1I (KIAA1120)	Tclin	2223	Ca_V	VGIC		Cav		pore-forming	calcium(*)	voltage-gated(*)	PMID: 31071485	Voltage-sensitive calcium channels (VSCC) mediate the entry of calcium ions into excitable cells and are also involved in a variety of calcium-dependent processes, including muscle contraction, hormone or neurotransmitter release, gene expression, cell motility, cell division and cell death.	No	VDCC, CACHANNEL	voltage-sensor		CATSPER1, CATSPER2	7WLJ		79	1730	1651	Yes			17	17	5|6 (4 subunits)	24	24	79	1730	T:79-99,T:121-141,T:149-168,T:174-191,T:212-232,T:378-398,T:641-661,T:677-697,T:703-721,T:730-753,T:765-785,T:842-862,T:1167-1187,T:1210-1230,T:1245-1265,T:1273-1294,T:1305-1325,T:1411-1431,T:1486-1506,T:1523-1543,T:1557-1577,T:1584-1607,T:1622-1642,T:1710-1730	https://www.ncbi.nlm.nih.gov/pmc/articles/PMC3140680/	212	232	378	398	765	785	842	862	1303	1325	1411	1431	1622
Q13698	Voltage-dependent L-type calcium channel subunit alpha-1S	CACNA1S (CACH1, CACN1, CACNL1A3)	Tclin	1873	Ca_V	VGIC		Cav		pore-forming	calcium(*)	voltage-gated(*)	PMID: 31071485	Pore-forming, alpha-1S subunit of the voltage-gated calcium channel that gives rise to L-type calcium currents in skeletal muscle.	No	GPHH, LVDCC, CACHANNEL	voltage-sensor	CACNB1, CACNB2, CACNG1, CACNA2D1	DYSF, JSRP1, RYR1, STAC, STAC2, STAC3, CALM	2VAY		32	1526	1494	Yes	32	1526	19	19	5|6 (4 subunits)	28	24	52	1381	T:52-70,T:86-106,T:116-136,T:161-179,T:197-218,I:280-301,T:310-330,T:433-451,T:463-483,T:495-514,T:524-542,T:562-581,I:602-623,T:634-653,T:800-818,T:831-850,T:867-885,T:893-911,T:931-950,I:1001-1021,T:1039-1060,T:1119-1140,T:1149-1170,T:1181-1200,T:1232-1250,T:1269-1289,I:1312-1330,T:1357-1381	https://scholar.google.com/scholar?hl=en&as_sdt=0%2C11&q=A+Novel+Mutation+in+CACNA1S+Gene+Associated+with+Hypokalemic+Periodic+Paralysis+Which+has+a+Gender+Difference+in+the+Penetrance&btnG=	197	218	310	330	562	581	634	653	931	950	1039	1060	1269
P35498	Sodium channel protein type 1 subunit alpha	SCN1A (NAC1, SCN1)	Tclin	2009	Na_V	VGIC		Nav		pore-forming	sodium(*)	voltage-gated	PubMed:21566136	Mediates the voltage-dependent sodium ion permeability of excitable membranes.	No	Na_trans, Ion-Tran	EF-hand, voltage sensing	SCN1B, SCN2B, SCN3B, SCN4B	FGF13, GVIIJ	7DTD		129	1785	1746	Yes	39	1780	19	19	5|6 5|6 5|6 5|6	28	24	129	1785	T:129-147,T:155-175,T:190-207,T:214-230,T:250-269,I:368-392,T:400-420,T:769-787,T:799-818,T:833-852,T:855-872,T:889-907,I:937-957,T:971-991,T:1220-1237,T:1251-1269,T:1284-1302,T:1311-1329,T:1347-1366,I:1419-1440,T:1458-1479,T:1543-1560,T:1572-1590,T:1603-1620,T:1634-1650,T:1670-1687,I:1710-1732,T:1763-1785	https://www.ncbi.nlm.nih.gov/pmc/articles/PMC6338345/	250	269	400	420	889	907	971	991	1347	1366	1458	1479	1670
Q99250	Sodium channel protein type 2 subunit alpha	SCN2A (NAC2, SCN2A1, SCN2A2)	Tclin	2005	Na_V	VGIC		Nav		pore-forming	sodium(*)	voltage-gated(*)	PubMed:1325650	Mediates the voltage-dependent sodium ion permeability of excitable membranes	No	Na_trans, Ion-Tran	EF-hand, voltage sensing	SCN1B, SCN2B, SCN3B, SCN4B	NEDD4L	6J8E		130	1775	1645	Yes			17	17	5|6 5|6 5|6 5|6	28	24	130	1775	T:130-148,T:156-176,T:191-208,T:215-231,T:251-270,I:370-394,T:402-422,T:760-778,T:790-809,T:824-843,T:846-863,T:880-898,I:928-948,T:962-982,T:1210-1227,T:1241-1259,T:1274-1292,T:1301-1319,T:1337-1356,I:1409-1430,T:1448-1469,T:1533-1550,T:1562-1580,T:1593-1610,T:1624-1640,T:1660-1677,I:1700-1722,T:1753-1775	https://www.ncbi.nlm.nih.gov/pmc/articles/PMC6338345/	251	270	402	422	880	898	962	982	1337	1356	1448	1469	1660
Q9NY46	Sodium channel protein type 3 subunit alpha	SCN3A (KIAA1356, NAC3)	Tclin	2000	Na_V	VGIC		Nav		pore-forming	sodium(*)	voltage-gated	PubMed:15548568	Mediates the voltage-dependent sodium ion permeability of excitable membranes	No	Na_trans, Ion-Tran	EF-hand, voltage sensing	SCN2B, SCN4B	NEDD4L, GVIIJ	7W7F		129	1770	1641	Yes			20	20	5|6 5|6 5|6 5|6	28	24	129	1770	T:129-147,T:155-175,T:190-207,T:214-230,T:250-269,I:369-393,T:401-421,T:761-779,T:791-810,T:825-844,T:847-864,T:881-899,I:929-949,T:963-983,T:1208-1225,T:1239-1257,T:1272-1290,T:1299-1317,T:1335-1354,I:1404-1425,T:1443-1464,T:1528-1545,T:1557-1575,T:1588-1605,T:1619-1635,T:1655-1672,I:1695-1717,T:1748-1770	https://www.ncbi.nlm.nih.gov/pmc/articles/PMC6338345/	250	269	401	421	881	899	963	983	1335	1354	1443	1464	1655
P35499	Sodium channel protein type 4 subunit alpha	SCN4A	Tclin	1836	Na_V	VGIC		Nav		pore-forming	sodium(*)	voltage-gated	PubMed:29992740, PubMed:30190309	Pore-forming subunit of a voltage-gated sodium channel complex through which Na+ ions pass in accordance with their electrochemical gradient.	No	Na_trans, Ion-Tran	EF-hand, voltage sensing	SCN1B, SCN2B, SCN4B	SNTA1, SNTB1, SNTB2, GVIIJ	6AGF		132	1597	1465	Yes			21	21	5|6 5|6 5|6 5|6	28	24	132	1597	T:132-150,T:158-178,T:193-210,T:217-233,T:253-272,I:392-416,T:424-444,T:579-597,T:609-628,T:643-662,T:665-682,T:699-717,I:747-767,T:779-797,T:1033-1050,T:1064-1082,T:1097-1115,T:1124-1142,T:1160-1179,I:1231-1252,T:1270-1291,T:1355-1372,T:1384-1402,T:1415-1432,T:1446-1462,T:1482-1499,I:1522-1544,T:1575-1597	https://www.ncbi.nlm.nih.gov/pmc/articles/PMC6338345/	253	272	424	444	699	717	779	797	1160	1179	1270	1291	1482
Q14524	Sodium channel protein type 5 subunit alpha	SCN5A	Tclin	2016	Na_V	VGIC		Nav		pore-forming	sodium(*)	voltage-gated	PubMed:15217910, PubMed:15548568, PubMed:19666841	This protein mediates the voltage-dependent sodium ion permeability of excitable membranes	No	Na_trans, Ion-Tran	EF-hand, voltage sensing		SNTA1, SNTB1, SNTB2, NEDD4, NEDD4L, WWP2, GPD1L, FGF13, FGF12, FGF14, ANK3, PKP2	2KB1		132	1771	1766	Yes	5	95	21	21	5|6 5|6 5|6 5|6	28	24	132	1771	T:132-150,T:158-178,T:193-210,T:217-233,T:253-272,I:358-382,T:390-410,T:718-736,T:748-767,T:782-801,T:804-821,T:838-856,I:884-904,T:918-938,T:1207-1224,T:1238-1256,T:1271-1289,T:1298-1316,T:1334-1353,I:1406-1427,T:1445-1466,T:1530-1547,T:1559-1577,T:1590-1607,T:1621-1637,T:1657-1674,I:1697-1719,T:1749-1771	https://www.ncbi.nlm.nih.gov/pmc/articles/PMC6338345/	253	272	390	410	838	856	918	938	1334	1353	1445	1460	1657
Q01118	Sodium channel protein type 7 subunit alpha	SCN7A (SCN6A)	Tclin	1682	Na_V	VGIC		Nav		pore-forming	sodium(*)	voltage-gated(*)	PMID: 1317577	Mediates the voltage-dependent sodium ion permeability of excitable membranes.	No	Na_trans, Ion-Tran	EF-hand, voltage sensing			7TJ8		118	1504	1479	Yes	25	1465	21	21	5|6 5|6 5|6 5|6	28	24	118	1504	T:118-137,T:142-167,T:179-196,T:201-219,T:238-259,I:339-366,T:368-407,T:506-521,T:531-559,T:569-586,T:593-609,T:627-655,I:674-700,T:702-732,T:935-953,T:962-990,T:999-1020,T:1022-1040,T:1056-1080,I:1128-1154,T:1168-1202,T:1251-1272,T:1277-1305,T:1313-1338,T:1342-1362,T:1378-1402,I:1421-1444,T:1469-1504	https://www.ncbi.nlm.nih.gov/pmc/articles/PMC6338345/	240	259	371	391	626	644	708	727	1058	1077	1168	1189	1380
Q9UQD0	Sodium channel protein type 8 subunit alpha	SCN8A (MED)	Tclin	1980	Na_V	VGIC		Nav		pore-forming	sodium(*)	voltage-gated(*)	PubMed:29726066	Mediates the voltage-dependent sodium ion permeability of excitable membranes	No	Na_trans, Ion-Tran	EF-hand, IQ, voltage sensing	SCN1B, SCN2B, SCN3B, SCN4B	NEDD4, NEDD4L, FGF13, FGF14, GBG3, GBB2, CALM1	8GZ1		133	1765	1738	Yes	27	1761	19	19	5|6 5|6 5|6 5|6	28	24	133	1765	T:133-151,T:159-179,T:194-211,T:218-234,T:254-273,I:356-380,T:388-408,T:754-772,T:784-803,T:818-837,T:840-857,T:874-892,I:922-942,T:956-976,T:1200-1217,T:1231-1249,T:1264-1282,T:1291-1309,T:1327-1346,I:1400-1421,T:1439-1460,T:1524-1541,T:1553-1571,T:1584-1601,T:1615-1631,T:1651-1668,I:1691-1713,T:1743-1765	https://www.ncbi.nlm.nih.gov/pmc/articles/PMC6338345/	254	273	388	408	874	892	956	976	1327	1346	1439	1460	1651
Q15858	Sodium channel protein type 9 subunit alpha	SCN9A (NENA)	Tclin	1988	Na_V	VGIC		Nav		pore-forming	sodium(*)	voltage-gated(*)	PubMed:7720699	Mediates the voltage-dependent sodium ion permeability of excitable membranes	No	Na_trans, Ion-Tran	EF-hand, voltage sensing	SCN1B, SCN2B, SCN3B, SCN4B	NEDD4, NEDD4L	6N4R		127	1759	1749	Yes	10	915	21	21	5|6 5|6 5|6 5|6	28	24	127	1759	T:127-145,T:153-173,T:188-205,T:212-228,T:248-267,I:347-371,T:379-399,T:745-763,T:775-794,T:809-828,T:831-848,T:865-883,I:913-933,T:947-967,T:1194-1211,T:1225-1243,T:1258-1276,T:1285-1303,T:1321-1340,I:1393-1414,T:1432-1453,T:1517-1534,T:1546-1564,T:1577-1594,T:1608-1624,T:1644-1661,I:1684-1706,T:1737-1759	https://www.ncbi.nlm.nih.gov/pmc/articles/PMC6338345/	248	267	379	399	865	883	947	967	1321	1340	1432	1453	1644
Q9Y5Y9	Sodium channel protein type 10 subunit alpha	SCN10A	Tclin	1956	Na_V	VGIC		Nav		pore-forming	sodium(*)	voltage-gated	PMID: 9839820	Tetrodotoxin-resistant channel that mediates the voltage-dependent sodium ion permeability of excitable membranes.	No	Na_trans, Ion-Tran	EF-hand, voltage sensing	SCN1B, SCN2B, SCN3B	NEDD4, NEDD4L, PRX, DYNLT1, PDZD2, FSTL1, PRX, DYNLT1, PDZD2, S100A10	7WEL		126	1722	1596	Yes			20	20	5|6 5|6 5|6 5|6	28	24	126	1722	T:126-149,T:155-174,T:188-206,T:213-232,T:249-272,I:342-366,T:374-399,T:660-684,T:696-719,T:728-747,T:754-773,T:790-810,I:835-855,T:865-890,T:1148-1171,T:1185-1210,T:1217-1238,T:1243-1264,T:1284-1311,I:1354-1375,T:1392-1418,T:1472-1495,T:1507-1530,T:1537-1560,T:1573-1594,T:1610-1632,I:1647-1669,T:1698-1722	https://www.ncbi.nlm.nih.gov/pmc/articles/PMC6338345/	249	272	374	399	790	810	865	890	1284	1311	1392	1418	1610
Q9UI33	Sodium channel protein type 11 subunit alpha	SCN11A (SCN12A, SNS2)	Tclin	1791	Na_V	VGIC		Nav		pore-forming	sodium(*)	voltage-gated(*)	PMID: 10580103	Mediates the voltage-dependent sodium ion permeability of excitable membranes	No	Na_trans, Ion-Tran	EF-hand, voltage sensing	SCN1B, SCN2B, SCN3B			AF-Q9UI33-F1	127	1604	1477	Yes			21	21	5|6 5|6 5|6 5|6	28	24	127	1604	T:127-148,T:157-180,T:193-212,T:220-239,T:256-269,I:345-369,T:377-402,T:573-596,T:608-631,T:640-659,T:668-687,T:703-725,I:754-774,T:786-811,T:1052-1074,T:1089-1114,T:1121-1138,T:1140-1161,T:1181-1202,I:1244-1265,T:1282-1308,T:1362-1385,T:1397-1420,T:1427-1450,T:1462-1484,T:1500-1522,I:1537-1559,T:1580-1604	https://www.ncbi.nlm.nih.gov/pmc/articles/PMC6338345/	220	256	269	377	668	703	725	786	1140	1181	1202	1282	1462
Q09470	Potassium voltage-gated channel subfamily A member 1	KCNA1	Tclin	495	K_V	VGIC	K channel	Kv		pore-forming	potassium	voltage-gated(*)	PMID: 17156368	Voltage-gated potassium channel that mediates transmembrane potassium transport in excitable membranes	No	KV, SHAKER, Ion-Tran	voltage sensing, , PDZ-binding		DLG1, DLG2, DLG4, LGI1, STX1A, ADAM11, ANK3		AF-Q09470-F1	165	415	250	Yes			4	4	5|6	8	6	165	415	T:165-186,T:221-242,T:254-274,T:288-308,T:324-345,I:360-371,I:372-379,T:387-415	https://www.ncbi.nlm.nih.gov/pmc/articles/PMC4565861/	324	345	387	415
P16389	Potassium voltage-gated channel subfamily A member 2	KCNA2	Tclin	499	K_V	VGIC	K channel	Kv		pore-forming	potassium(*)	voltage-gated(*)	PMID: 11086297	Voltage-gated potassium channel that mediates transmembrane potassium transport in excitable membranes	No	KV, Ion-Tran	BTB, voltage sensing		FYN, PTK2B, CTTN, RHOA, DRD2, SIGMAR1, ADAM22, ADAM11, DLG1, DLG2, DLG4, CNTNAP2		AF-P16389-F1	161	417	256	Yes			5	5	5|6	8	6	161	417	T:161-182,T:222-243,T:255-275,T:290-310,T:326-347,I:362-373,I:374-381,T:389-417	https://www.ncbi.nlm.nih.gov/pmc/articles/PMC4565861/	326	347	389	417
P22001	Potassium voltage-gated channel subfamily A member 3	KCNA3 (HGK5)	Tclin	575	K_V	VGIC	K channel	Kv		pore-forming	potassium	voltage-gated(*)	PMID: 35788586	Mediates the voltage-dependent potassium ion permeability of excitable membranes.	No	KV, Ion-Tran	BTB, voltage sensing, PDZ-binding			7SSV		235	481	246	Yes			5	5	5|6	6	6	235	481	T:235-253,T:295-316,T:328-348,T:363-381,T:398-417,T:459-481	https://www.ncbi.nlm.nih.gov/pmc/articles/PMC4565861/	398	417	459	481
P22459	Potassium voltage-gated channel subfamily A member 4	KCNA4 (KCNA4L)	Tclin	653	K_V	VGIC	K channel	Kv		pore-forming	potassium(*)	voltage-gated(*)	PMID: 17156368	Voltage-gated potassium channel that mediates transmembrane potassium transport in excitable membranes.	No	KV, Ion-Tran	BTB, voltage sensing		DLG1, DLG2, DLG4, SIGMAR1, LGI1, KCNRG		AF-P22459-F1	305	567	262	Yes			3	3	5|6	8	6	305	567	T:305-326,T:371-392,T:404-424,T:440-460,T:476-497,I:512-523,I:524-531,T:539-567	https://www.ncbi.nlm.nih.gov/pmc/articles/PMC4565861/	476	497	539	567
P22460	Potassium voltage-gated channel subfamily A member 5	KCNA5	Tclin	613	K_V	VGIC	K channel	Kv		pore-forming	potassium	voltage-gated(*)	PMID: 12130714	Voltage-gated potassium channel that mediates transmembrane potassium transport in excitable membranes.	No	KV, SHAKER, Ion-Tran	BTB, voltage sensing, PDZ-binding		DLG1, CAV3, UBE2I		AF-P22460-F1	248	523	275	Yes			3	3	5|6	8	6	248	523	T:248-269,T:324-345,T:357-377,T:396-416,T:432-453,I:468-479,I:480-487,T:495-523	https://www.ncbi.nlm.nih.gov/pmc/articles/PMC4565861/	432	453	495	523
P17658	Potassium voltage-gated channel subfamily A member 6	KCNA6	Tclin	529	K_V	VGIC	K channel	Kv		pore-forming	potassium(*)	voltage-gated(*)	PMID: 2347305	Voltage-gated potassium channel that mediates transmembrane potassium transport in excitable membranes	No	KV, Ion-Tran	BTB, voltage sensing, PDZ-binding				AF-P17658-F1	172	465	293	Yes			4	4	1|2	8	6	172	465	T:172-193,T:263-284,T:296-316,T:338-358,T:374-395,I:410-421,I:422-429,T:437-465	https://www.bio.fsu.edu/~dfadool/Sukhee1.pdf	374	395	437	395
Q96RP8	Potassium voltage-gated channel subfamily A member 7	KCNA7	Tclin	456	K_V	VGIC	K channel	Kv		pore-forming	potassium(*)	voltage-gated(*)	PMID: 11368907	Mediates the voltage-dependent potassium ion permeability of excitable membranes.	No	KV, SHAKER, Ion-Tran	BTB, voltage sensing				AF-Q96RP8-F1	144	393	249	Yes			5	5	5|6	6	6	144	393	T:144-164,T:209-229,T:241-261,T:276-295,T:312-332,T:373-393	https://www.ncbi.nlm.nih.gov/pmc/articles/PMC4565861/	312	332	373	393
Q16322	Potassium voltage-gated channel subfamily A member 10	KCNA10	Tclin	511	K_V	VGIC	K channel	Kv		pore-forming	potassium(*)	voltage-gated(*)	PMID: 21231794	Mediates voltage-dependent potassium ion permeability of excitable membranes.	No	KV, SHAKER, Ion-Tran	BTB,voltage sensing				AF-Q16322-F1	218	456	238	Yes			4	4	5|6	6	6	218	456	T:218-238,T:271-292,T:303-323,T:339-358,T:375-395,T:436-456	https://www.ncbi.nlm.nih.gov/pmc/articles/PMC4565861/	375	395	436	456
Q14721	Potassium voltage-gated channel subfamily B member 1	KCNB1	Tclin	858	K_V	VGIC	K channel	Kv		pore-forming	potassium(*)	voltage-gated	PubMed:8081723, PubMed:1283219, PubMed:10484328, PubMed:12560340, PubMed:19074135, PubMed:19717558, PubMed:24901643	Voltage-gated potassium channel that mediates transmembrane potassium transport in excitable membranes	No	KV, SHAB, Ion-Tran	BTB,voltage sensing	AMIGO1, KCNE1, KCNE2, KCNE3	STX1A, SNAP25, CREB1, MYL12B, PIAS3, SUMO1, PTPRE	7SPD		88	420	332	Yes	88	201	5	5	5|6	8	6	187	420	T:187-208,T:229-250,T:260-280,T:295-316,T:331-351,I:365-376,I:377-384,T:392-420	https://www.ncbi.nlm.nih.gov/pmc/articles/PMC4565861/	331	351	392	420
Q92953	Potassium voltage-gated channel subfamily B member 2	KCNB2	Tclin	911	K_V	VGIC	K channel	Kv		pore-forming	potassium(*)	voltage-gated(*)	PMID: 10414301	Voltage-gated potassium channel that mediates transmembrane potassium transport in excitable membranes	No	KV, SHAB, Ion-Tran	BTB,voltage sensing				AF-Q92953-F1	191	424	233	Yes			5	5	5|6	8	6	191	424	T:191-212,T:233-254,T:266-284,T:297-317,T:333-354,I:369-380,I:381-388,T:396-424	https://www.ncbi.nlm.nih.gov/pmc/articles/PMC4565861/	333	354	396	424
P48547	Potassium voltage-gated channel subfamily C member 1	KCNC1	Tclin	511	K_V	VGIC	K channel	Kv		pore-forming	potassium	voltage-gated	PMID: 35840580	The channel opens in response to the voltage difference across the membrane, forming a potassium-selective channel through which potassium ions pass in accordance with their electrochemical gradient	No	KV, Ion-Tran	T1, voltage sensing, linker			7PHH		191	436	245	Yes			5	5	5|6	6	6	191	436	T:191-209,T:248-267,T:277-295,T:309-331,T:345-366,T:415-436	https://www.ncbi.nlm.nih.gov/pmc/articles/PMC4565861/	345	366	415	436
Q96PR1	Potassium voltage-gated channel subfamily C member 2	KCNC2	Tclin	638	K_V	VGIC	K channel	Kv		pore-forming	potassium(*)	voltage-gated(*)	PMID: 11506885	Voltage-gated potassium channel that mediates transmembrane potassium transport in excitable membranes	No	KV, SHAW, Ion-Tran	BTB, voltage sensing				AF-Q96PR1-F1	230	473	243	Yes			6	6	5|6	6	6	230	473	T:230-250,T:284-303,T:314-334,T:346-368,T:382-402,T:453-473	https://www.ncbi.nlm.nih.gov/pmc/articles/PMC4565861/	382	402	453	473
Q14003	Potassium voltage-gated channel subfamily C member 3	KCNC3	Tclin	757	K_V	VGIC	K channel	Kv		pore-forming	potassium(*)	voltage-gated(*)	PMID: 23734863	Voltage-gated potassium channel that plays an important role in the rapid repolarization of fast-firing brain neurons.	No	KV, SHAW, Ion-Tran	BTB,voltage sensing	HAX1, ACTR3			AF-Q14003-F1	291	539	248	Yes			4	4	5|6	6	6	291	539	T:291-309,T:351-370,T:380-398,T:412-434,T:448-469,T:518-539	https://www.ncbi.nlm.nih.gov/pmc/articles/PMC4565861/	448	469	518	539
Q03721	Potassium voltage-gated channel subfamily C member 4	KCNC4 (C1orf30)	Tclin	635	K_V	VGIC	K channel	Kv		pore-forming	potassium(*)	voltage-gated(*)	PMID: 7993631	This protein mediates the voltage-dependent potassium ion permeability of excitable membranes.	No	K_chnl, Ion_tran	BTB, voltage sensing			1B4G		227	472	245	Yes			3	3	5|6	6	6	227	472	T:227-247,T:278-298,T:313-333,T:345-364,T:381-401,T:452-472	https://www.ncbi.nlm.nih.gov/pmc/articles/PMC4565861/	381	401	451	472
Q9NSA2	Potassium voltage-gated channel subfamily D member 1	KCND1	Tclin	647	K_V	VGIC	K channel	Kv		pore-forming	potassium(*)	voltage-gated(*)	PMID: 31071485	Pore-forming (alpha) subunit of voltage-gated rapidly inactivating A-type potassium channels	No	KV, Ion-Tran	BTB, voltage sensing	KCNIP1, KCNIP2, KCNIP3, KCNIP4	DPP10		AF-Q9NSA2-F1	185	465	280	Yes			5	5	2|3 6|7	7	6	185	407	T:185-205,T:227-247,T:262-282,T:292-312,T:326-346,I:365-385,T:387-407	https://www.ncbi.nlm.nih.gov/pmc/articles/PMC4565861/	326	346	437	465
Q9NZV8	Potassium voltage-gated channel subfamily D member 2	KCND2 (KIAA1044)	Tclin	630	K_V	VGIC	K channel	Kv		pore-forming	potassium(*)	voltage-gated(*)	PubMed:14980201, PubMed:16934482, PubMed:24811166,	Voltage-gated potassium channel that mediates transmembrane potassium transport in excitable membranes, primarily in the brain.	No	KV, SHAL, Ion-Tran	BTB, voltage sensing	KCNIP1, KCNIP2, KCNIP3, KCNIP4	DPP6, DPP10, DLG4, DLG1, FLNA, FLNC	7E8H		169	413	244	Yes	169	405	6	6	5|6	8	6	183	413	T:183-204,T:229-250,T:262-279,T:287-306,T:322-343,I:358-369,I:370-377,T:385-413	https://www.ncbi.nlm.nih.gov/pmc/articles/PMC4565861/	322	343	385	413
Q9UK17	Potassium voltage-gated channel subfamily D member 3	KCND3	Tclin	655	K_V	VGIC	K channel	Kv		pore-forming	potassium(*)	voltage-gated(*)	PMID: 31071485	Pore-forming (alpha) subunit of voltage-gated rapidly inactivating A-type potassium channels.	No	KV, SHAL, Ion-Tran	BTB, voltage sensing	KCNIP1, KCNIP2, KCNIP3, KCNIP4	KCNE1, KCNE2, SCN1B, KCNAB1, DLG1	7W6T		8	423	415	Yes	8	423	6	6	5|6	7	6	182	402	T:182-202,T:222-242,T:257-277,T:287-307,T:321-341,I:360-380,T:382-402	https://www.ncbi.nlm.nih.gov/pmc/articles/PMC4565861/	321	341	382	402
Q9H3M0	Potassium voltage-gated channel subfamily F member 1	KCNF1	Tclin	494	K_V	VGIC	K channel	Kv		pore-forming	potassium(*)	voltage-gated(*)	PMID: 12445884	Putative voltage-gated potassium channel.	No	KV, Ion-Tran	BTB, voltage sensing		DLG1		AF-Q9H3M0-F1	184	406	222	Yes			4	4	5|6	7	6	184	406	T:184-204,T:224-244,T:250-270,T:290-310,T:325-345,I:358-378,T:386-406	https://www.ncbi.nlm.nih.gov/pmc/articles/PMC4565861/	325	345	386	406
Q9UIX4	Potassium voltage-gated channel subfamily G member 1	KCNG1	Tclin	513	K_V	VGIC	K channel	Kv		pore-forming	potassium(*)	voltage-gated(*)	PubMed:19074135	Potassium channel subunit that does not form functional channels by itself. Can form functional heterotetrameric channels with KCNB1;	No	KV, Ion-Tran	BTB, voltage sensing				AF-Q9UIX4-F1	225	467	242	Yes			4	4	5|6	8	6	225	467	T:225-246,T:268-289,T:301-321,T:339-359,T:375-396,I:412-423,I:424-431,T:439-467	https://www.ncbi.nlm.nih.gov/pmc/articles/PMC4565861/	375	396	439	467
Q9UJ96	Potassium voltage-gated channel subfamily G member 2	KCNG2 (KCNF2)	Tclin	466	K_V	VGIC	K channel	Kv		pore-forming	potassium(*)	voltage-gated(*)	PMID: 10551266	Potassium channel subunit. Modulates channel activity by shifting the threshold and the half-maximal activation to more negative values.	No	KV, Ion-Tran	BTB, voltage sensing				AF-Q9UJ96-F1	178	405	227	Yes			5	5	5|6	7	6	178	405	T:178-198,T:218-238,T:253-273,T:288-308,T:322-342,I:357-377,T:385-405	https://www.ncbi.nlm.nih.gov/pmc/articles/PMC4565861/	322	342	385	405
Q8TAE7	Potassium voltage-gated channel subfamily G member 3	KCNG3	Tclin	436	K_V	VGIC	K channel	Kv		pore-forming	potassium(*)	voltage-gated(*)	PMID: 11852086	Potassium channel subunit that does not form functional channels by itself. Can form functional heterotetrameric channels with KCNB1	No	KV, Ion-Tran	BTB,voltage sensing				AF-Q8TAE7-F1	169	416	247	Yes			7	7	5|6	8	6	169	416	T:169-190,T:221-242,T:254-274,T:285-305,T:321-342,I:361-372,I:373-380,T:388-416	https://www.ncbi.nlm.nih.gov/pmc/articles/PMC4565861/	321	342	388	416
Q8TDN1	Potassium voltage-gated channel subfamily G member 4	KCNG4 (KCNG3)	Tclin	519	K_V	VGIC	K channel	Kv		pore-forming	potassium(*)	voltage-gated(*)	PMID: 12060745	Potassium channel subunit that does not form functional channels by itself	No	KV, Ion-Tran	BTB,voltage sensing				AF-Q8TDN1-F1	219	461	242	Yes			3	3	5|6	8	6	219	461	T:219-240,T:262-283,T:295-314,T:329-353,T:369-390,I:406-417,I:418-425,T:433-461	https://www.ncbi.nlm.nih.gov/pmc/articles/PMC4565861/	369	390	433	461
O95259	Potassium voltage-gated channel subfamily H member 1	KCNH1 (EAG, EAG1)	Tclin	989	K_V	VGIC	K channel	Kv		pore-forming	potassium(*)	voltage-gated	PMID: 31071485	Pore-forming (alpha) subunit of a voltage-gated delayed rectifier potassium channel	No	cyclic nucleotide-binding	PAS, CaM-bd, voltage sensing		ALG10B, RABEP1, CTTN	5J7E		66	498	432	Yes	66	127	4	4	5|6	7	6	221	498	T:221-241,T:249-269,T:291-309,T:346-368,T:378-399,I:449-470,T:478-498	https://elifesciences.org/articles/49188	378	399	478	498
Q12809	Potassium voltage-gated channel subfamily H member 2	KCNH2 (ERG, ERG1, HERG)	Tclin	1159	K_V	VGIC	K channel	Kv		pore-forming	potassium	voltage-gated(*)	PMID: 31071485	Pore-forming (alpha) subunit of voltage-gated inwardly rectifying potassium channel.	No	Ion-Tran	PAS, CaM-bd, voltage sensing	KCNE1, KCNE2	DNAJB12, DNAJB14, DNAJB12, DNAJB14, ALG10B, CANX, RNF207, NDFIP1, NDFIP2	5VA3		404	659	255	Yes	557	656	4	4	5|6	7	6	404	659	T:404-424,T:451-471,T:496-516,T:521-541,T:548-568,I:612-632,T:639-659	https://www.ncbi.nlm.nih.gov/pmc/articles/PMC4565861/	548	568	639	659
Q9ULD8	Potassium voltage-gated channel subfamily H member 3	KCNH3 (KIAA1282)	Tclin	1083	K_V	VGIC	K channel	Kv		pore-forming	potassium(*)	voltage-gated(*)	PMID: 31071485	Pore-forming (alpha) subunit of voltage-gated potassium channel.	No	Ion-Tran	PAS, CaM-bd, voltage sensing				AF-Q9ULD8-F1	229	500	271	Yes			4	4	5|6	7	6	229	500	T:229-249,T:260-280,T:303-323,T:332-352,T:362-382,I:454-474,T:480-500	https://www.ncbi.nlm.nih.gov/pmc/articles/PMC4565861/	362	382	480	500
Q9UQ05	Potassium voltage-gated channel subfamily H member 4	KCNH4	Tclin	1017	K_V	VGIC	K channel	Kv		pore-forming	potassium(*)	voltage-gated(*)	PMID: 31071485	Pore-forming (alpha) subunit of voltage-gated potassium channel. Elicits an outward current, but shows no inactivation. Channel properties may be modulated by cAMP and subunit assembly.	No	Ion-Tran	PAS, CaM-bd, voltage sensing				AF-Q9UQ05-F1	229	503	274	Yes			6	6	5|6	7	6	229	503	T:229-249,T:260-280,T:303-323,T:333-353,T:362-382,I:428-448,T:483-503	https://www.ncbi.nlm.nih.gov/pmc/articles/PMC4565861/	362	382	483	503
Q8NCM2	Potassium voltage-gated channel subfamily H member 5	KCNH5 (EAG2)	Tclin	988	K_V	VGIC	K channel	Kv		pore-forming	potassium(*)	voltage-gated(*)	PMID: 31071485	Pore-forming (alpha) subunit of voltage-gated potassium channel.	No	KV, Ion-Tran	PAS, CaM-bd, voltage sensing				AF-Q8NCM2-F1	218	467	249	Yes			4	4	5|6	7	6	218	467	T:218-238,T:244-264,T:292-312,T:320-340,T:347-367,I:420-440,T:447-467	https://www.ncbi.nlm.nih.gov/pmc/articles/PMC4565861/	347	367	447	467
Q9H252	Potassium voltage-gated channel subfamily H member 6	KCNH6 (ERG2)	Tclin	994	K_V	VGIC	K channel	Kv		pore-forming	potassium(*)	voltage-gated(*)	PMID: 31071485	Pore-forming (alpha) subunit of voltage-gated potassium channel. Elicits a slowly activating, rectifying current (By similarity). Channel properties may be modulated by cAMP and subunit assembly	No	KV, ERG, Ion-Tran	PAS, CaM-bd, voltage sensing				AF-Q9H252-F1	262	511	249	Yes			4	4	5|6	7	6	262	511	T:262-282,T:299-319,T:341-361,T:371-391,T:399-419,I:464-484,T:491-511	https://www.ncbi.nlm.nih.gov/pmc/articles/PMC4565861/	399	419	491	511
Q9NS40	Potassium voltage-gated channel subfamily H member 7	KCNH7 (ERG3)	Tclin	1196	K_V	VGIC	K channel	Kv		pore-forming	potassium(*)	voltage-gated(*)	PMID: 31071485	Pore-forming (alpha) subunit of voltage-gated potassium channel. Channel properties may be modulated by cAMP and subunit assembly.	No	Ion-Tran	PAS, CaM-bd, voltage sensing			6Y7Q		37	662	625	Yes	37	129	4	4	5|6	7	6	413	662	T:413-433,T:450-470,T:495-515,T:522-542,T:550-570,I:615-635,T:642-662	https://www.ncbi.nlm.nih.gov/pmc/articles/PMC4565861/	550	570	642	662
Q96L42	Potassium voltage-gated channel subfamily H member 8	KCNH8	Tclin	1107	K_V	VGIC	K channel	Kv		pore-forming	potassium(*)	voltage-gated(*)	PMID: 31071485	Pore-forming (alpha) subunit of voltage-gated potassium channel. Elicits a slowly activating, outward rectifying current. Channel properties may be modulated by cAMP and subunit assembly.	No	KV, Ion-Tran	PAS, CaM-bd, voltage sensing				AF-Q96L42-F1	226	469	243	Yes			6	6	5|6	7	6	226	469	T:226-246,T:256-276,T:299-319,T:328-348,T:358-378,I:420-440,T:449-469	https://www.ncbi.nlm.nih.gov/pmc/articles/PMC4565861/	358	378	449	469
P51787	Potassium voltage-gated channel subfamily KQT member 1	KCNQ1 (KCNA8, KCNA9, KVLQT1)	Tclin	676	K_V	VGIC	K channel	Kv		pore-forming	potassium	voltage-gated	PMID: 18165683	Potassium channel that plays an important role in a number of tissues, including heart, inner ear, stomach and colon	No	K_chnl, Ion_tran	coiled coil	KCNE1, KCNE2, KCNE3, KCNE4, KCNE5		6V01		122	348	226	Yes			6	6	5|6	7	6	122	348	T:122-142,T:148-168,T:197-217,T:226-248,T:262-282,I:300-320,T:328-348	https://www.ncbi.nlm.nih.gov/pmc/articles/PMC4565861/	262	282	328	348
O43526	Potassium voltage-gated channel subfamily KQT member 2	KCNQ2	Tclin	872	K_V	VGIC	K channel	Kv		pore-forming	potassium	voltage-gated	PMID: 10479678	Associates with KCNQ3to form a potassium channel with essentially identical properties to the channel underlying the native M-current	No	K_chnl, Ion_tran	not shown		KCNE2, SLC5A3, IQCJ, SCHIP1	7CR4		80	562	482	Yes	80	562	5	5	5|6	7	6	92	312	T:92-112,T:123-143,T:167-187,T:196-218,T:232-252,I:265-285,T:292-312	https://www.ncbi.nlm.nih.gov/pmc/articles/PMC4565861/	232	252	292	312
O43525	Potassium voltage-gated channel subfamily KQT member 3	KCNQ3	Tclin	872	K_V	VGIC	K channel	Kv		pore-forming	potassium	voltage-gated	PMID: 10479678	Associates with KCNQ2 or KCNQ5 to form a potassium channel with essentially identical properties to the channel underlying the native M-current	No	K_chnl, Ion_tran	not shown		KCNE2, SLC5A3, IQCJ, SCHIP1	5J03		47	554	507	Yes	47	554	5	5	5|6	7	6	122	351	T:122-142,T:153-173,T:197-217,T:226-247,T:262-282,I:304-324,T:331-351	https://www.ncbi.nlm.nih.gov/pmc/articles/PMC4565861/	262	282	331	351
P56696	Potassium voltage-gated channel subfamily KQT member 4	KCNQ4	Tclin	695	K_V	VGIC	K channel	Kv		pore-forming	potassium(*)	voltage-gated(*)	PMID: 17329207	Probably important in the regulation of neuronal excitability	No	K_chnl, Ion_tran	coiled coil, voltage sensing		HSP90AB1	7BYN		98	317	219	Yes	245	311	5	5	5|6	7	6	98	317	T:98-118,T:132-152,T:173-193,T:202-224,T:238-258,I:271-292,T:297-317	https://www.ncbi.nlm.nih.gov/pmc/articles/PMC4565861/	238	258	297	317
Q9NR82	Potassium voltage-gated channel subfamily KQT member 5	KCNQ5	Tclin	932	K_V	VGIC	K channel	Kv		pore-forming	potassium	voltage-gated	PubMed:11159685, PubMed:10787416, PubMed:24855057	Associates with KCNQ3 to form a potassium channel which contributes to M-type current, a slowly activating and deactivating potassium conductance which plays a critical role in determining the subthreshold electrical excitability of neurons.	No	KC, Ion-Tran	voltage sensing			6B8Q		18	512	494	Yes	18	512	5	5	5|6	7	6	126	346	T:126-146,T:157-177,T:201-221,T:230-252,T:267-287,I:299-319,T:326-346	https://www.ncbi.nlm.nih.gov/pmc/articles/PMC4565861/	267	287	326	346
Q96KK3	Potassium voltage-gated channel subfamily S member 1	KCNS1	Tclin	526	K_V	VGIC	K channel	Kv		pore-forming	potassium(*)	voltage-gated(*)	PMID: 21231794	Potassium channel subunit that does not form functional channels by itself. Can form functional heterotetrameric channels with KCNB1 and KCNB2	No	KV, Ion-Tran	BTB,voltage sensing				AF-Q96KK3-F1	218	464	246	Yes			3	3	5|6	8	6	218	464	T:218-239,T:271-293,T:305-322,T:338-358,T:374-395,I:409-420,I:421-428,T:436-464	https://www.ncbi.nlm.nih.gov/pmc/articles/PMC4565861/	374	395	436	464
Q9ULS6	Potassium voltage-gated channel subfamily S member 2	KCNS2 (KIAA1144)	Tclin	477	K_V	VGIC	K channel	Kv		pore-forming	potassium(*)	voltage-gated(*)	PMID: 20393197	Potassium channel subunit that does not form functional channels by itself. Can form functional heterotetrameric channels with KCNB1 and KCNB2	No	KV, Ion-Tran	BTB, voltage sensing				AF-Q9ULS6-F1	185	417	232	Yes			4	4	5|6	8	6	185	417	T:185-206,T:226-248,T:260-280,T:291-311,T:327-348,I:362-373,I:374-381,T:389-417	https://www.ncbi.nlm.nih.gov/pmc/articles/PMC4565861/	327	348	389	417
Q9BQ31	Potassium voltage-gated channel subfamily S member 3	KCNS3	Tclin	491	K_V	VGIC	K channel	Kv		pore-forming	potassium(*)	voltage-gated(*)	PMID: 10484328	Potassium channel subunit that does not form functional channels by itself.	No	KV, Ion-Tran	BTB, voltage sensing				AF-Q9BQ31-F1	183	413	230	Yes			3	3	5|6	8	6	183	413	T:183-204,T:221-243,T:255-275,T:286-306,T:322-343,I:358-369,I:370-377,T:385-413	https://www.ncbi.nlm.nih.gov/pmc/articles/PMC4565861/	322	343	385	413
Q6PIU1	Potassium voltage-gated channel subfamily V member 1	KCNV1	Tclin	500	K_V	VGIC	K channel	Kv		pore-forming	potassium(*)	voltage-gated(*)	PMID: 8670833	Potassium channel subunit that does not form functional channels by itself.	No	KV, Ion-Tran	BTB,voltage sensing				AF-Q6PIU1-F1	211	427	216	Yes			4	4	5|6	6	6	211	427	T:211-231,T:239-259,T:277-297,T:310-331,T:346-366,T:407-427	https://www.ncbi.nlm.nih.gov/pmc/articles/PMC4565861/	346	366	407	427
Q8TDN2	Potassium voltage-gated channel subfamily V member 2	KCNV2	Tclin	545	K_V	VGIC	K channel	Kv		pore-forming	potassium(*)	voltage-gated(*)	PMID: 12060745	Potassium channel subunit. Modulates channel activity by shifting the threshold and the half-maximal activation to more negative values.	No	KV, Ion-Tran	BTB,voltage sensing				AF-Q8TDN2-F1	156	492	336	Yes			3	3	5|6	7	6	156	492	T:156-176,T:262-282,T:337-357,T:375-395,T:411-431,I:445-465,T:472-492	https://www.ncbi.nlm.nih.gov/pmc/articles/PMC4565861/	411	431	472	492
O00180	Potassium channel subfamily K member 1	KCNK1 (HOHO1, KCNO1, TWIK1)	Tbio	336	K_2P	VGIC	K channel	K2P		2-pore	potassium(*)	leak(inward rectifier)	PMID: 16382106	Ion channel that contributes to passive transmembrane potassium transport	No	2-pore, TWIK	no		GNG4, PSD, ARF6, UBE2I	3UKM		21	268	247	Yes	117	268	5	5	1|2 3|4	8	4	21	267	T:21-41,I:104-116,I:117-122,T:133-156,T:182-202,I:212-224,I:225-231,T:244-267	https://journals.physiology.org/doi/full/10.1152/physrev.00029.2009	21	41	133	156	182	202	244	267
O95069	Potassium channel subfamily K member 2	KCNK2 (TREK, TREK1)	Tclin	426	K_2P	VGIC	K channel	K2P		2-pore	potassium(*)	leak, voltage-gated(*)	PMID: 16382106	Ion channel that contributes to passive transmembrane potassium transport	No	2-pore, K_chnl, TREK	no		BVES	4TWK		43	308	265	Yes	43	297	6	6	1|2 3|4	6	4	62	308	T:62-82,I:144-170,T:172-192,T:224-244,I:253-283,T:288-308	https://journals.physiology.org/doi/full/10.1152/physrev.00029.2009	62	82	172	192	224	244	288	308
O14649	Potassium channel subfamily K member 3	KCNK3 (TASK, TASK1)	Tclin	394	K_2P	VGIC	K channel	K2P		2-pore	potassium	leak(inward rectifier)(*)	PMID: 16382106	pH-dependent, voltage-insensitive, background potassium channel protein.	No	2-pore, K_chnl, TASK	no			6RV4		9	252	243	Yes	93	252	5	5	1|2 3|4	6	4	9	243	T:9-29,I:78-101,T:108-128,T:159-179,I:184-207,T:223-243	https://journals.physiology.org/doi/full/10.1152/ajprenal.2000.279.5.F793?rfr_dat=cr_pub++0pubmed&url_ver=Z39.88-2003&rfr_id=ori%3Arid%3Acrossref.org	9	29	108	128	159	179	223	243
Q9NYG8	Potassium channel subfamily K member 4	KCNK4 (TRAAK)	Tbio	393	K_2P	VGIC	K channel	K2P		2-pore	potassium	leak(open), mechanosensitive	PMID: 16382106	Voltage-insensitive potassium channel	No	2-pore, K_chnl, TRAAK	no					4	260	256	Yes			6	6		8	4	4	260	T:4-24,I:88-102,I:103-109,T:118-150,T:173-194,I:200-213,I:214-219,T:234-260
O95279	Potassium channel subfamily K member 5	KCNK5 (TASK2)	Tbio	499	K_2P	VGIC	K channel	K2P		2-pore	potassium(*)	leak(outward rectifier)(*)	PMID: 16382106	pH-dependent, outwardly rectifying potassium channel	No	2-pore, K_chnl, TASK	no				AF-O95279-F1	8	250	242	Yes			6	6	1|2 3|4	6	4	8	250	T:8-26,I:85-112,T:113-133,T:158-180,I:190-215,T:230-250	https://pubs.asahq.org/anesthesiology/article/92/6/1722/38415/Volatile-Anesthetics-Activate-the-Human-Tandem	8	26	113	133	158	180	230	250
Q9Y257	Potassium channel subfamily K member 6	KCNK6 (TOSS, TWIK2)	Tbio	313	K_2P	VGIC	K channel	K2P		2-pore	potassium(*)	leak(inward/outward rectifier)(*)	PMID: 16382106	Exhibits outward rectification in a physiological K+ gradient and mild inward rectification in symmetrical K+ conditions.	No	2-pore, K_chnl, TWIK	no				AF-Q9Y257-F1	5	256	251	Yes			6	6	1|2 3|4	6	4	5	256	T:5-25,I:90-115,T:121-141,T:173-193,I:199-223,T:236-256	https://journals.physiology.org/doi/full/10.1152/physrev.00029.2009	5	25	121	141	173	193	236	256
Q9Y2U2	Potassium channel subfamily K member 7	KCNK7	Tdark	307	K_2P	VGIC	K channel	K2P		2-pore	not shown(*)	leak(*)	PMID: 16382106	Probable potassium channel subunit. No channel activity observed in vitro as protein remains in the endoplasmic reticulum. May need to associate with an as yet unknown partner in order to reach the plasma membrane.	No	2-pore, K_chnl, TWIK	not shown				AF-Q9Y2U2-F1	11	253	242	Yes			6	6	1|2 3|4	6	4	11	253	T:11-31,I:92-119,T:120-140,T:171-191,I:199-227,T:233-253	https://scholar.google.com/scholar_lookup?title=Cloning%20of%20a%20new%20mouse%20two%20P-domain%20channel%20subunit%20and%20a%20human%20homologue%20with%20a%20unique%20pore%20structure&publication_year=1999&author=M.%20Salinas&author=R.%20Reyes&author=F.%20Lesage&author=M.%20Fosset&author=C.%20Heurteaux&author=G.%20Romey&author=M.%20Lazdunski	11	31	120	140	171	191	233	253
Q9NPC2	Potassium channel subfamily K member 9	KCNK9 (TASK3)	Tclin	374	K_2P	VGIC	K channel	K2P		2-pore	potassium(*)	leak(open)(*)	PMID: 16382106	pH-dependent, voltage-insensitive, background potassium channel protein	No	2-pore, K_chnl, TASK	no			3SMN		9	372	363	Yes	19	372	6	6	1|2 3|4	6	4	9	239	T:9-29,I:89-101,T:108-128,T:159-179,I:195-207,T:219-239	https://journals.physiology.org/doi/full/10.1152/physrev.00029.2009	9	29	108	128	159	179	219	239
P57789	Potassium channel subfamily K member 10	KCNK10 (TREK2)	Tclin	538	K_2P	VGIC	K channel	K2P		2-pore	potassium(*)	leak(outward rectifier)	PMID: 16382106	Outward rectifying potassium channel. Produces rapidly activating and non-inactivating outward rectifier K+ currents. Activated by arachidonic acid and other naturally occurring unsaturated free fatty acids.	No	2-pore, K_chnl, TREK	no			4XDJ		72	319	247	Yes	172	283	6	6	1|2 3|4	6	4	72	319	T:72-92,I:154-180,T:182-202,T:234-254,I:263-294,T:299-319	https://journals.physiology.org/doi/full/10.1152/physrev.00029.2009	72	92	182	202	234	254	299	319
Q9HB15	Potassium channel subfamily K member 12	KCNK12	Tbio	430	K_2P	VGIC	K channel	K2P		2-pore	not shown	leak(*)	PMID: 16382106	Probable potassium channel subunit. No channel activity observed in heterologous systems. May need to associate with another protein to form a functional channel	No	2-pore, K_chnl, THIK	not shown				AF-Q9HB15-F1	39	302	263	Yes			6	6	1|2 3|4	6	4	39	302	T:39-59,I:114-134,T:145-165,T:213-233,I:243-263,T:282-302	https://journals.physiology.org/doi/full/10.1152/physrev.00029.2009	39	59	145	165	213	233	282	302
Q9HB14	Potassium channel subfamily K member 13	KCNK13	Tbio	408	K_2P	VGIC	K channel	K2P		2-pore	potassium(*)	leak(open)	PMID: 16382106	Potassium channel displaying weak inward rectification in symmetrical K+ solution.	No	2-pore, K_chnl, THIK	no				AF-Q9HB14-F1	20	283	263	Yes			6	6	1|2 3|4	6	4	20	283	T:20-40,I:95-115,T:125-145,T:194-214,I:224-244,T:263-283	https://journals.physiology.org/doi/full/10.1152/physrev.00029.2009	20	40	125	145	194	214	263	283
Q9H427	Potassium channel subfamily K member 15	KCNK15 (TASK5)	Tbio	330	K_2P	VGIC	K channel	K2P		2-pore	not shown(*)	leak(*)	PMID: 16382106	Probable potassium channel subunit. No channel activity observed in heterologous systems. May need to associate with another protein to form a functional channel.	No	2-pore, K_chnl, TASK	not shown				AF-Q9H427-F1	9	243	234	Yes			5	5		6	4	9	243	T:9-29,I:80-101,T:108-128,T:159-179,I:189-209,T:223-243	https://physoc.onlinelibrary.wiley.com/doi/full/10.1113/jphysiol.2014.287268	9	29	108	128	159	179	223	243
Q96T55	Potassium channel subfamily K member 16	KCNK16 (TALK1)	Tbio	309	K_2P	VGIC	K channel	K2P		2-pore	potassium(*)	leak(outward rectifier)(*)	PMID: 16382106	Outward rectifying potassium channel. Produces rapidly activating and non-inactivating outward rectifier K+ currents.	No	2-pore, K_chnl, TASK	no				AF-Q96T55-F1	14	258	244	Yes			6	6	1|2 3|4	6	4	14	258	T:14-34,I:98-116,T:120-140,T:166-186,I:202-221,T:238-258	https://physoc.onlinelibrary.wiley.com/doi/full/10.1113/jphysiol.2014.287268	14	34	120	140	166	186	238	258
Q96T54	Potassium channel subfamily K member 17	KCNK17 (TALK2, TASK4)	Tchem	332	K_2P	VGIC	K channel	K2P		2-pore	potassium(*)	leak(outward rectifier)(*)	PMID: 16382106	Outward rectifying potassium channel. Produces rapidly activating and non-inactivating outward rectifier K+ currents.	No	2-pore, K_chnl, TASK	no				AF-Q96T54-F1	21	264	243	Yes			6	6	1|2 3|4	6	4	21	264	T:21-43,I:106-124,T:128-148,T:180-200,I:211-230,T:244-264	https://physoc.onlinelibrary.wiley.com/doi/full/10.1113/jphysiol.2014.287268	21	43	128	148	180	200	244	264
Q7Z418	Potassium channel subfamily K member 18	KCNK18 (TRESK, TRIK)	Tclin	384	K_2P	VGIC	K channel	K2P		2-pore	potassium	leak(outward rectifier)(*)	PMID: 16382106	Outward rectifying potassium channel. Produces rapidly activating outward rectifier K+ currents. May function as background potassium channel that sets the resting membrane potential.	No	2-pore, K_chnl	no		calcineurin, YWHAH		AF-Q7Z418-F1	24	355	331	Yes			5	5	1|2 3|4	6	4	24	355	T:24-44,I:103-129,T:130-148,T:281-301,I:314-328,T:335-355	https://journals.physiology.org/doi/full/10.1152/physrev.00029.2009	24	44	130	148	281	301	335	355
P48048	ATP-sensitive inward rectifier potassium channel 1	KCNJ1 (ROMK1)	Tchem	391	K_IR	VGIC	K channel	KIR		pore-forming	potassium(*)	voltage-gated(inward rectifier)(*)	PMID: 14618155	Inward rectifier potassium channels are characterized by a greater tendency to allow potassium to flow into the cell rather than out of it. This channel is activated by internal ATP and can be blocked by external barium	No	IRK	no		SGK1, SLC9A3R2, NHERF2		AF-P48048-F1	78	177	99	Yes			2	2	1|2	4	2	78	177	T:78-102,I:128-139,I:140-146,T:156-177	https://www.bio.fsu.edu/~dfadool/Sukhee1.pdf	78	102	156	177
P63252	Inward rectifier potassium channel 2	KCNJ2 (IRK1)	Tchem	427	K_IR	VGIC	K channel	KIR		pore-forming	potassium	voltage-gated(inward rectifier)(*)	PMID: 14618155	Inward rectifier potassium channels are characterized by a greater tendency to allow potassium to flow into the cell rather than out of it.	No	IRK	PDZ-binding		LIN7A, LIN7B, LIN7C, DLG1, CASK, APBA1	7ZDZ		70	178	108	Yes			2	2	1|2	4	2	82	178	T:82-106,I:129-140,I:141-147,T:157-178	https://www.bio.fsu.edu/~dfadool/Sukhee1.pdf	82	106	157	178
P48549	G protein-activated inward rectifier potassium channel 1	KCNJ3 (GIRK1)	Tchem	501	K_IR	VGIC	K channel	KIR		pore-forming	potassium	voltage-gated(inward rectifier)	PMID: 14618155	This potassium channel is controlled by G proteins. Inward rectifier potassium channels are characterized by a greater tendency to allow potassium to flow into the cell rather than out of it.	No	IRK	no				AF-P48549-F1	81	179	98	Yes			3	3	1|2	4	2	81	179	T:81-105,I:130-141,I:142-148,T:158-179	https://www.bio.fsu.edu/~dfadool/Sukhee1.pdf	81	105	158	179
P48050	Inward rectifier potassium channel 4	KCNJ4 (IRK3)	Tchem	445	K_IR	VGIC	K channel	KIR		pore-forming	potassium	voltage-gated(inward rectifier)(*)	PMID: 14618155	Inward rectifier potassium channels are characterized by a greater tendency to allow potassium to flow into the cell rather than out of it.	No	IRK	PDZ-binding		LIN7A, LIN7B, LIN7C, DLG1, CASK, APBA, TAX1BP3	3GJ9		12	170	158	Yes	12	117	3	3	1|2	4	2	56	170	T:56-80,I:121-132,I:133-139,T:149-170	https://www.bio.fsu.edu/~dfadool/Sukhee1.pdf	56	80	149	170
P48544	G protein-activated inward rectifier potassium channel 4	KCNJ5 (GIRK4)	Tchem	419	K_IR	VGIC	K channel	KIR		pore-forming	potassium	voltage-gated(inward rectifier)(*)	PMID: 14618155	This potassium channel is controlled by G proteins. Inward rectifier potassium channels are characterized by a greater tendency to allow potassium to flow into the cell rather than out of it.	No	IRK	no				AF-P48544-F1	87	185	98	Yes			2	2	1|2	4	2	87	185	T:87-111,I:136-147,I:148-154,T:164-185	https://www.bio.fsu.edu/~dfadool/Sukhee1.pdf	87	111	164	185
P48051	G protein-activated inward rectifier potassium channel 2	KCNJ6 (GIRK2, KATP2, KCNJ7)	Tchem	423	K_IR	VGIC	K channel	KIR		pore-forming	potassium	voltage-gated(inward rectifier)(*)	PMID: 14618155	Inward rectifier potassium channels are characterized by a greater tendency to allow potassium to flow into the cell rather than out of it.	No	IRK	PDZ-binding		SNX27		AF-P48051-F1	90	188	98	Yes			2	2	1|2	4	2	90	188	T:90-114,I:139-150,I:151-157,T:167-188	https://www.bio.fsu.edu/~dfadool/Sukhee1.pdf	90	114	167	188
Q15842	ATP-sensitive inward rectifier potassium channel 8	KCNJ8	Tbio	424	K_IR	VGIC	K channel	KIR		pore-forming	potassium	voltage-gated(inward rectifier)(*)	PMID: 14618155	This receptor is controlled by G proteins. Inward rectifier potassium channels are characterized by a greater tendency to allow potassium to flow into the cell rather than out of it.	No	IRK	no				AF-Q15842-F1	70	176	106	Yes			2	2	1|2	4	2	70	176	T:70-94,I:127-138,I:139-145,T:155-176	https://www.bio.fsu.edu/~dfadool/Sukhee1.pdf	70	94	155	176
Q92806	G protein-activated inward rectifier potassium channel 3	KCNJ9 (GIRK3)	Tbio	393	K_IR	VGIC	K channel	KIR		pore-forming	potassium	voltage-gated(inward rectifier)(*)	PMID: 14618155	This potassium channel is controlled by G proteins. Inward rectifier potassium channels are characterized by a greater tendency to allow potassium to flow into the cell rather than out of it.	No	IRK	PDZ-binding		SNX27	6X23		58	156	98	Yes			3	3	1|2	4	2	58	156	T:58-82,I:107-118,I:119-125,T:135-156	https://www.bio.fsu.edu/~dfadool/Sukhee1.pdf	58	82	135	156
P78508	ATP-sensitive inward rectifier potassium channel 10	KCNJ10	Tbio	379	K_IR	VGIC	K channel	KIR		pore-forming	potassium(*)	voltage-gated(inward rectifier)(*)	PMID: 14618155	Inward rectifier potassium channels are characterized by a greater tendency to allow potassium to flow into the cell rather than out of it.	No	IRK	no				AF-P78508-F1	65	164	99	Yes			2	2	1|2	4	2	65	164	T:65-89,I:115-126,I:127-133,T:143-164	https://www.bio.fsu.edu/~dfadool/Sukhee1.pdf	65	89	143	164
Q14654	ATP-sensitive inward rectifier potassium channel 11	KCNJ11	Tclin	390	K_IR	VGIC	K channel	KIR		pore-forming	potassium	voltage-gated(inward rectifier)(*)	PMID: 14618155	Inward rectifier potassium channels are characterized by a greater tendency to allow potassium to flow into the cell rather than out of it.	No	IRK	no	ABCC8, ABCC9		6C3P		69	166	97	Yes			2	2	1|2	4	2	69	166	T:69-93,I:117-128,I:129-135,T:145-166	https://www.bio.fsu.edu/~dfadool/Sukhee1.pdf	69	93	145	166
Q14500	ATP-sensitive inward rectifier potassium channel 12	KCNJ12 (IRK2, KCNJN1)	Tchem	433	K_IR	VGIC	K channel	KIR		pore-forming	potassium	voltage-gated(inward rectifier)(*)	PMID: 14618155	Inward rectifier potassium channels are characterized by a greater tendency to allow potassium to flow into the cell rather than out of it.	No	IRK	PDZ-binding		LIN7A, LIN7B, LIN7C, DLG1, CASK, APBA1		AF-Q14500-F1	83	181	98	Yes			3	3	1|2	5	2	83	181	T:83-107,I:124-128,I:129-141,I:142-151,T:157-181	https://www.bio.fsu.edu/~dfadool/Sukhee1.pdf	83	107	157	181
O60928	Inward rectifier potassium channel 13	KCNJ13	Tbio	360	K_IR	VGIC	K channel	KIR		pore-forming	potassium(*)	voltage-gated(inward rectifier)(*)	PMID: 14618155	Inward rectifier potassium channels are characterized by a greater tendency to allow potassium to flow into the cell rather than out of it.	No	IRK	no				AF-O60928-F1	54	155	101	Yes			2	2	1|2	4	2	54	155	T:54-78,I:106-117,I:118-124,T:134-155	https://www.bio.fsu.edu/~dfadool/Sukhee1.pdf	54	78	134	155
Q9UNX9	ATP-sensitive inward rectifier potassium channel 14	KCNJ14 (IRK4)	Tchem	436	K_IR	VGIC	K channel	KIR		pore-forming	potassium	voltage-gated(inward rectifier)(*)	PMID: 14618155	Inward rectifier potassium channels are characterized by a greater tendency to allow potassium to flow into the cell rather than out of it.	No	IRK	no				AF-Q9UNX9-F1	87	183	96	Yes			3	3	1|2	4	2	87	183	T:87-111,I:134-145,I:146-152,T:162-183	https://www.bio.fsu.edu/~dfadool/Sukhee1.pdf	87	111	162	183
Q99712	ATP-sensitive inward rectifier potassium channel 15	KCNJ15 (KCNJ14)	Tbio	375	K_IR	VGIC	K channel	KIR		pore-forming	potassium(*)	voltage-gated(inward rectifier)(*)	PMID: 14618155	Inward rectifier potassium channels are characterized by a greater tendency to allow potassium to flow into the cell rather than out of it.	No	IRK	no		PATJ		AF-Q99712-F1	64	163	99	Yes			2	2	1|2	4	2	64	163	T:64-88,I:114-125,I:126-132,T:142-163	https://www.bio.fsu.edu/~dfadool/Sukhee1.pdf	64	88	142	163
Q9NPI9	Inward rectifier potassium channel 16	KCNJ16	Tbio	418	K_IR	VGIC	K channel	KIR		pore-forming	potassium(*)	voltage-gated(inward rectifier)(*)	PMID: 14618155	Inward rectifier potassium channels are characterized by a greater tendency to allow potassium to flow into the cell rather than out of it.	No	IRK	no				AF-Q9NPI9-F1	71	167	96	Yes			2	2	1|2	4	2	71	167	T:71-95,I:118-129,I:130-136,T:146-167	https://www.bio.fsu.edu/~dfadool/Sukhee1.pdf	71	95	146	167
B7U540	Inward rectifier potassium channel 18	KCNJ18	Tbio	433	K_IR	VGIC	K channel	KIR		pore-forming	potassium(*)	voltage-gated(inward rectifier)(*)	PMID: 14618155	Inward rectifier potassium channels are characterized by a greater tendency to allow potassium to flow into the cell rather than out of it.	No	IRK	no		KCNJ2		AF-B7U540-F1	85	177	92	Yes			3	3	1|2	2	2	85	177	T:85-105,T:157-177	https://www.bio.fsu.edu/~dfadool/Sukhee1.pdf	85	105	157	177
Q5JUK3	Potassium channel subfamily T member 1	KCNT1 (KIAA1422)	Tchem	1230	K_Ca.K_Na	VGIC	K channel	Kca.KNa		pore-forming	potassium(*)	voltage-gated(outward rectifier)(*)	PMID: 26912814	Outwardly rectifying potassium channel subunit that may coassemble with other Slo-type channel subunits. Activated by high intracellular sodium or chloride levels.	No	BK, K_chnl, Ion_tran	RCK		FMR1, CRBN		AF-Q5JUK3-F1	98	325	227	Yes	IR		5	5	5|6	7	6	98	325	T:98-118,T:156-176,T:188-208,T:214-226,T:252-272,I:282-302,T:305-325	https://www.sciencedirect.com/science/article/pii/S0167488914000834
Q6UVM3	Potassium channel subfamily T member 2	KCNT2 (SLICK)	Tchem	1135	K_Ca.K_Na	VGIC	K channel	Kca.KNa		pore-forming	potassium(*)	voltage-gated(outward rectifier)(*)	PMID: 14684870	Outward rectifying potassium channel. Produces rapidly activating outward rectifier K+ currents. Activated by high intracellular sodium and chloride levels	No	BK, K_chnl, Ion_tran	RCK				AF-Q6UVM3-F1	64	277	213	Yes			5	5	5|6	7	6	64	277	T:64-84,T:102-122,T:138-158,T:165-185,T:199-219,I:229-249,T:257-277	https://www.sciencedirect.com/science/article/pii/S0167488914000834	199	219	257	277
Q92952	Small conductance calcium-activated potassium channel protein 1	KCNN1 (SK)	Tchem	543	K_Ca.K_Na	VGIC	K channel	Kca.KNa		pore-forming	potassium	ligand-gated(calcium)(*)	PMID: 27046646	Forms a voltage-independent potassium channel activated by intracellular calcium	No	SK, K_chnl, Ion_tran	CaM-bd		CALM1, CALM2, CALM3		AF-Q92952-F1	111	366	255	Yes			5	5	5|6	7	6	111	366	T:111-131,T:140-160,T:179-199,T:228-248,T:277-297,I:317-337,T:346-366	https://www.sciencedirect.com/science/article/pii/S0167488914000834	277	297	346	366
Q9H2S1	Small conductance calcium-activated potassium channel protein 2	KCNN2	Tchem	579	K_Ca.K_Na	VGIC	K channel	Kca.KNa		pore-forming	potassium	ligand-gated(calcium)(*)	PMID: 27046646	Forms a voltage-independent potassium channel activated by intracellular calcium	No	SK, K_chnl, Ion_tran	CaM-bd		CALM1	6ALE		138	394	446	Yes	29	475	7	7	5|6	7	6	138	394	T:138-158,T:168-188,T:214-234,T:256-276,T:305-325,I:345-365,T:374-394	https://www.sciencedirect.com/science/article/pii/S0167488914000834	305	325	374	394
Q9UGI6	Small conductance calcium-activated potassium channel protein 3	KCNN3 (K3)	Tchem	731	K_Ca.K_Na	VGIC	K channel	Kca.KNa		pore-forming	potassium	ligand-gated(calcium)(*)	PMID: 27046646	Forms a voltage-independent potassium channel activated by intracellular calcium	No	SK, K_chnl, Ion_tran	CaM-bd		CALM1		AF-Q9UGI6-F1	288	543	255	Yes			5	5	5|6	7	6	288	543	T:288-308,T:315-335,T:366-386,T:405-425,T:454-474,I:494-514,T:523-543	https://www.sciencedirect.com/science/article/pii/S0167488914000834	454	474	523	543
O15554	Intermediate conductance calcium-activated potassium channel protein 4	KCNN4 (IK1, IKCA1, KCA4, SK4)	Tchem	427	K_Ca.K_Na	VGIC	K channel	Kca.KNa		pore-forming	potassium(*)	voltage-gated(calcium, inward rectifier)(*)	PMID: 9407042	Forms a voltage-independent potassium channel that is activated by intracellular calcium	No	K_chnl	CaM-bd		MTMR6, CALM3	6CNO		29	364	335	Yes	107	364	5	5	5|6	7	6	29	285	T:29-49,T:59-79,T:108-128,T:143-163,T:207-227,I:241-261,T:265-285	https://www.sciencedirect.com/science/article/pii/S0167488914000834	207	227	265	285
A8MYU2	Potassium channel subfamily U member 1	KCNU1 (KCNMA3, KCNMC1, SLO3)	Tbio	1149	K_Ca.K_Na	VGIC	K channel	Kca.KNa		pore-forming	potassium(*)	voltage-gated, pH sensitive(*)	PMID: 23129643	Testis-specific potassium channel activated by both intracellular pH and membrane voltage that mediates export of K+.	No	BK, K_chnl, Ion_tran	RCK, voltage-sensor		LRRC52	4HPF		25	312	287	Yes	499	912	6	6	5|6	8	7	25	312	T:25-45,T:102-122,T:139-159,T:164-184,T:189-209,T:227-247,I:260-282,T:292-312	https://www.sciencedirect.com/science/article/pii/S0167488914000834	189	209	227	247
Q12791	Calcium-activated potassium channel subunit alpha-1	KCNMA1 (KCNMA, SLO)	Tclin	1236	K_Ca.K_Na	VGIC	K channel	Kca.KNa		pore-forming	potassium	voltage-gated(calcium)	PMID: 29330545	Potassium channel activated by both membrane depolarization or increase in cytosolic Ca2+ that mediates export of K+	No	BK, K_chnl, Ion_tran	RCK, voltage-sensor, calcium sensing tail	KCNMB1, KCNMB2, KCNMB3, KCNMB4, LRRC26, LRRC38, LRRC52, LRRC55		6V3G		87	388	301	Yes	381	810	6	6	5|6	8	7	87	388	T:87-107,T:179-199,T:215-235,T:240-260,T:265-285,T:301-321,I:336-358,T:368-388	https://www.sciencedirect.com/science/article/pii/S0167488914000834	265	285	301	321
P15382	Potassium voltage-gated channel subfamily E member 1	KCNE1	Tchem	129	KCNE	VGIC	K channel auxiliary	KCNE		auxiliary			PMID: 31071485	Ancillary protein that assembles as a beta subunit with a voltage-gated potassium channel complex of pore-forming alpha subunits. Modulates the gating kinetics and enhances stability of the channel complex. Assembled with KCNB1 modulates the gating characteristics of the delayed rectifier voltage-dependent potassium channel KCNB1 (	Yes	K_chnl_KCNE	no		KCNH2, HERG, KNCQ1	2K21					Yes			1	1		1	1	44	66	T:44-66
Q9Y6J6	Potassium voltage-gated channel subfamily E member 2	KCNE2	Tbio	123	KCNE	VGIC	K channel auxiliary	KCNE		auxiliary			PMID: 31071485	Ancillary protein that assembles as a beta subunit with a voltage-gated potassium channel complex of pore-forming alpha subunits. Modulates the gating kinetics and enhances stability of the channel complex. Assembled with KCNB1 modulates the gating characteristics of the delayed rectifier voltage-dependent potassium channel KCNB1.	Yes	K_chnl_KCNE	no		KCNH2, ERG1, KCNQ2, KCNQ3	2M0Q					Yes			1	1		1	1	49	69	T:49-69
Q9Y6H6	Potassium voltage-gated channel subfamily E member 3	KCNE3	Tbio	103	KCNE	VGIC	K channel auxiliary	KCNE		auxiliary			PMID: 31071485	Ancillary protein that assembles as a beta subunit with a voltage-gated potassium channel complex of pore-forming alpha subunits. Modulates the gating kinetics and enhances stability of the channel complex. Assembled with KCNB1 modulates the gating characteristics of the delayed rectifier voltage-dependent potassium channel KCNB1	Yes	K_chnl_KCNE	no		KCNC4, Kv3.4, KCNQ1	6V01					Yes			1	1		1	1	58	78	T:58-78
Q8WWG9	Potassium voltage-gated channel subfamily E member 4	KCNE4	Tbio	221	KCNE	VGIC	K channel auxiliary	KCNE		auxiliary			PMID: 31071485	Ancillary protein that assembles as a beta subunit with a voltage-gated potassium channel complex of pore-forming alpha subunits. Modulates the gating kinetics and enhances stability of the channel complex. May associate with KCNQ1/KVLTQ1 and inhibit potassium current.	Yes	K_chnl_KCNE	no		KCNQ1		AF-Q8WWG9-F1				Yes			1	1		1	1	87	107	T:87-107
Q9UJ90	Potassium voltage-gated channel subfamily E regulatory beta subunit 5	KCNE5 (AMMECR2, KCNE1L)	Tbio	142	KCNE	VGIC	K channel auxiliary	KCNE		auxiliary			PMID: 31071485	Potassium channel ancillary subunit that is essential for generation of some native K+ currents by virtue of formation of heteromeric ion channel complex with voltage-gated potassium (Kv) channel pore-forming alpha subunits. Functions as an inhibitory beta-subunit of the repolarizing cardiac potassium ion channel KCNQ1	Yes	K_chnl_KCNE	no		KCNQ1		AF-Q9UJ90-F1				Yes			1	1		1	1	61	81	T:61-81
Q9NZI2	Kv channel-interacting protein 1	KCNIP1 (KCHIP1, VABP)	Tbio	227	KCNIP	VGIC	K channel auxiliary	KCNIP		auxiliary			PMID: 31071485	Regulatory subunit of Kv4/D (Shal)-type voltage-gated rapidly inactivating A-type potassium channels. Regulates channel density, inactivation kinetics and rate of recovery from inactivation in a calcium-dependent and isoform-specific manner. In vitro, modulates KCND1/Kv4.1 and KCND2/Kv4.2 currents. Increases the presence of KCND2 at the cell surface.	Yes		EF-hand	DPP6, DPP10		7W6T					No			0	0
Q9NS61	Kv channel-interacting protein 2	KCNIP2 (KCHIP2)	Tbio	270	KCNIP	VGIC	K channel auxiliary	KCNIP		auxiliary			PMID: 31071485	Regulatory subunit of Kv4/D (Shal)-type voltage-gated rapidly inactivating A-type potassium channels. Modulates channel density, inactivation kinetics and rate of recovery from inactivation in a calcium-dependent and isoform-specific manner. In vitro, modulates KCND2/Kv4.2 and KCND3/Kv4.3 currents.	Yes		EF-hand	DPP6, DPP10		7W6S					No			0	0
Q9Y2W7	Calsenilin	KCNIP3 (CSEN, DREAM, KCHIP3)	Tbio	256	KCNIP	VGIC	K channel auxiliary	KCNIP		auxiliary			PMID: 31071485	Regulatory subunit of Kv4/D (Shal)-type voltage-gated rapidly inactivating A-type potassium channels, such as KCND2/Kv4.2 and KCND3/Kv4.3. Modulates channel expression at the cell membrane, gating characteristics, inactivation kinetics and rate of recovery from inactivation in a calcium-dependent and isoform-specific manner	Yes		EF-hand	DPP6, DPP10		2E6W					No			0	0
Q6PIL6	Kv channel-interacting protein 4	KCNIP4 (CALP, KCHIP4)	Tbio	250	KCNIP	VGIC	K channel auxiliary	KCNIP		auxiliary			PMID: 31071485	Regulatory subunit of Kv4/D (Shal)-type voltage-gated rapidly inactivating A-type potassium channels. Modulates KCND2 channel density, inactivation kinetics and rate of recovery from inactivation in a calcium-dependent and isoform-specific manner	Yes		EF-hand	DPP6, DPP10	PSEN2, PSEN1		AF-Q6PIL6-F1				No			0	0
Q16558	Calcium-activated potassium channel subunit beta-1	KCNMB1	Tbio	191	KCNMB	VGIC	K channel auxiliary	KCNMB		auxiliary			PMID: 12136044	Regulatory subunit of the calcium activated potassium KCNMA1 (maxiK) channel. Modulates the calcium sensitivity and gating kinetics of KCNMA1, thereby contributing to KCNMA1 channel diversity. Increases the apparent Ca2+/voltage sensitivity of the KCNMA1 channel.	Yes	BK, K_chnl	no				AF-Q16558-F1				Yes			2	2		2	2	19	178	T:19-39,T:158-178
Q9Y691	Calcium-activated potassium channel subunit beta-2	KCNMB2	Tbio	235	KCNMB	VGIC	K channel auxiliary	KCNMB		auxiliary			PMID: 12136044	Regulatory subunit of the calcium activated potassium KCNMA1 (maxiK) channel. Modulates the calcium sensitivity and gating kinetics of KCNMA1, thereby contributing to KCNMA1 channel diversity. Increases the apparent Ca2+/voltage sensitivity of the KCNMA1 channel.	Yes	BK, K_chnl	ball_chain			1JO6					Yes			2	2		2	2	47	215	T:47-67,T:195-215
Q9NPA1	Calcium-activated potassium channel subunit beta-3	KCNMB3 (KCNMB2, KCNMBL)	Tbio	279	KCNMB	VGIC	K channel auxiliary	KCNMB		auxiliary			PMID: 12136044	Regulatory subunit of the calcium activated potassium KCNMA1 (maxiK) channel. Modulates the calcium sensitivity and gating kinetics of KCNMA1, thereby contributing to KCNMA1 channel diversity.	Yes	K_chnl	no				AF-Q9NPA1-F1				Yes			2	2		2	2	61	228	T:61-81,T:208-228
Q86W47	Calcium-activated potassium channel subunit beta-4	KCNMB4	Tbio	210	KCNMB	VGIC	K channel auxiliary	KCNMB		auxiliary			PMID: 10792058	Regulatory subunit of the calcium activated potassium KCNMA1 (maxiK) channel. Modulates the calcium sensitivity and gating kinetics of KCNMA1, thereby contributing to KCNMA1 channel diversity.	Yes	K_chnl	no		FMR1	6V35					Yes			2	2		2	2	20	188	T:20-40,T:168-188
Q14722	Voltage-gated potassium channel subunit beta-1	KCNAB1 (KCNA1B)	Tbio	419	KCNAB	VGIC	K channel auxiliary	KCNAB		auxiliary			PubMed:7499366	Cytoplasmic potassium channel subunit that modulates the characteristics of the channel-forming alpha-subunits	Yes	KV_beta	NADP_OxRdtase	KCNAB1, KCNAB2	GNB1, GNG2, SQSTM1		AF-Q14722-F1				No			0	0
Q13303	Voltage-gated potassium channel subunit beta-2 ·	KCNAB2 (KCNA2B, KCNK2)	Tbio	367	KCNAB	VGIC	K channel auxiliary	KCNAB		auxiliary			PubMed:7649300	Cytoplasmic potassium channel subunit that modulates the characteristics of the channel-forming alpha-subunits	Yes	KV_beta	NADP_OxRdtase		MAPRE1, SQSTM1, PRKCZ	7WF3 / 7WF4					No			0	0
O43448	Voltage-gated potassium channel subunit beta-3 ·	KCNAB3 (KCNA3B)	Tbio	404	KCNAB	VGIC	K channel auxiliary	KCNAB		auxiliary			PMID: 9857044	Accessory potassium channel protein which modulates the activity of the pore-forming alpha subunit. Alters the functional properties of Kv1.5	Yes	KV_beta	NADP_OxRdtase				AF-O43448-F1				No			0	0
P54289	Voltage-dependent calcium channel subunit alpha-2/delta-1	CACNA2D1 (CACNL2A, CCHL2A, MHS3)	Tclin	1103	CACN	VGIC	VGIC auxiliary	CACN		auxiliary			PMID: 31071485	The alpha-2/delta subunit of voltage-dependent calcium channels regulates calcium current density and activation/inactivation kinetics of the calcium channel. Plays an important role in excitation-contraction coupling (By similarity)	Yes		VWFA, MIDAS-like			7VFW					Yes			0	0		1	1	1074	1094	T:1074-1094
Q9NY47	Voltage-dependent calcium channel subunit alpha-2/delta-2	CACNA2D2 (KIAA0558)	Tclin	1150	CACN	VGIC	VGIC auxiliary	CACN		auxiliary			PMID: 31071485	The alpha-2/delta subunit of voltage-dependent calcium channels regulates calcium current density and activation/inactivation kinetics of the calcium channel. Acts as a regulatory subunit for P/Q-type calcium channel (CACNA1A), N-type (CACNA1B), L-type (CACNA1C OR CACNA1D) and possibly T-type (CACNA1G)	Yes	VDCC	VWFA, MIDAS-like								Yes			0	0		1	1	1114	1134	T:1114-1134
Q8IZS8	Voltage-dependent calcium channel subunit alpha-2/delta-3	CACNA2D3	Tbio	1091	CACN	VGIC	VGIC auxiliary	CACN		auxiliary			PMID: 31071485	The alpha-2/delta subunit of voltage-dependent calcium channels regulates calcium current density and activation/inactivation kinetics of the calcium channel. Acts as a regulatory subunit for P/Q-type calcium channel (CACNA1A), N-type (CACNA1B), L-type (CACNA1C OR CACNA1D) but not T-type (CACNA1G) (By similarity).	Yes	VDCC	VWFA, MIDAS-like				AF-Q8IZS8-F1				Yes			0	0		1	1	1069	1089	T:1069-1089
Q7Z3S7	Voltage-dependent calcium channel subunit alpha-2/delta-4	CACNA2D4	Tbio	1137	CACN	VGIC	VGIC auxiliary	CACN		auxiliary			PMID: 31071485	The alpha-2/delta subunit of voltage-dependent calcium channels regulates calcium current density and activation/inactivation kinetics of the calcium channel	Yes	VDCC	VWFA, MIDAS-like								Yes			0	0		1	1	1116	1136	T:1116-1136
Q06432	Voltage-dependent calcium channel gamma-1 subunit	CACNG1 (CACNLG)	Tbio	222	CACN	VGIC	VGIC auxiliary	CACN		auxiliary			PMID: 31071485	Regulatory subunit of the voltage-gated calcium channel that gives rise to L-type calcium currents in skeletal muscle. Regulates channel inactivation kinetics.	Yes	VDCC	no								Yes			4	4		4	4	11	204	T:11-29,T:109-129,T:135-155,T:180-204
Q9Y698	Voltage-dependent calcium channel gamma-2 subunit	CACNG2	Tbio	323	CACN	VGIC	VGIC auxiliary	CACN		auxiliary			PMID: 31071485	Regulates the trafficking and gating properties of AMPA-selective glutamate receptors (AMPARs). Thought to stabilize the calcium channel in an inactivated (closed) state.	Yes	VDCC	no		MPP2	6O9G					Yes			4	4		4	4	10	202	T:10-30,T:104-124,T:134-154,T:182-202
O60359	Voltage-dependent calcium channel gamma-3 subunit	CACNG3	Tbio	315	CACN	VGIC	VGIC auxiliary	CACN		auxiliary			PMID: 31071485	Regulates the trafficking to the somatodendritic compartment and gating properties of AMPA-selective glutamate receptors (AMPARs).	Yes	VDCC	no		AP4M1		AF-O60359-F1				Yes			4	4		4	4	8	201	T:8-28,T:104-124,T:135-155,T:181-201
Q9UBN1	Voltage-dependent calcium channel gamma-4 subunit	CACNG4	Tbio	327	CACN	VGIC	VGIC auxiliary	CACN		auxiliary			PMID: 31071485	Regulates the activity of L-type calcium channels that contain CACNA1C as pore-forming subunit	Yes	VDCC	no				AF-Q9UBN1-F1				Yes			4	4		4	4	10	207	T:10-30,T:108-128,T:137-157,T:187-207
Q9UF02	Voltage-dependent calcium channel gamma-5 subunit	CACNG5	Tdark	275	CACN	VGIC	VGIC auxiliary	CACN		auxiliary			PMID: 31071485	Regulates the gating properties of AMPA-selective glutamate receptors (AMPARs). Modulates their gating properties by accelerating their rates of activation, deactivation and desensitization.	Yes	VDCC	no								Yes			4	4		4	4	8	196	T:8-28,T:103-123,T:129-149,T:176-196
Q9BXT2	Voltage-dependent calcium channel gamma-6 subunit	CACNG6	Tdark	260	CACN	VGIC	VGIC auxiliary	CACN		auxiliary			PMID: 31071485	Regulates the activity of L-type calcium channels that contain CACNA1C as pore-forming subunit.	Yes	VDCC	no				AF-Q9BXT2-F1				Yes			4	4		4	4	43	241	T:43-63,T:143-163,T:169-189,T:221-241
P62955	Voltage-dependent calcium channel gamma-7 subunit	CACNG7	Tdark	275	CACN	VGIC	VGIC auxiliary	CACN		auxiliary			PMID: 31071485	Regulates the activity of L-type calcium channels that contain CACNA1C as pore-forming subunit	Yes	VDCC	no								Yes			4	4		4	4	8	199	T:8-28,T:103-123,T:129-149,T:179-199
Q8WXS5	Voltage-dependent calcium channel gamma-8 subunit	CACNG8 (CACNG6)	Tbio	425	CACN	VGIC	VGIC auxiliary	CACN		auxiliary			PMID: 31071485	Regulates the activity of L-type calcium channels that contain CACNA1C as pore-forming subunit (By similarity).	Yes	VDCC	no		CNIH2						Yes			4	4		5	5	19	338	T:19-39,T:129-149,T:158-178,T:208-228,T:318-338
Q5VT99	Leucine-rich repeat-containing protein 38	LRRC38	Tbio	294	VGIC auxiliary	VGIC	VGIC auxiliary			auxiliary			PMID: 22547800	Auxiliary protein of the large-conductance, voltage and calcium-activated potassium channel (BK alpha).	Yes	LRR	no		KCNMA1		AF-Q5VT99-F1				Yes			1	1		1	1	250	270	T:250-270
Q6ZSA7	Leucine-rich repeat-containing protein 55	LRRC55	Tbio	298	VGIC auxiliary	VGIC	VGIC auxiliary			auxiliary			PMID: 22547800	Auxiliary protein of the large-conductance, voltage and calcium-activated potassium channel (BK alpha). Modulates gating properties by producing a marked shift in the BK channel's voltage dependence of activation in the hyperpolarizing direction, and in the absence of calcium.	Yes	LRR	no		KCNMA1		AF-Q6ZSA7-F1				Yes			1	1		1	1	259	279	T:259-279
Q401N2	Zinc-activated ligand-gated ion channel	ZACN (L2, LGICZ, LGICZ1, ZAC)	Tchem	412	ZAC	LGIC	Cys-loop	ZAC		pore-forming	sodium, potassium, cesium	ligand-gated(zinc, copper, proton)	PMID: 12381728	Zinc-activated ligand-gated ion channel.	No	Neur_channel	no				AF-Q401N2-F1	234	389	155	Yes			5	5	2	4	4	234	389	T:234-254,T:266-286,T:299-319,T:369-389	https://scholar.google.com/scholar?hl=en&as_sdt=0%2C11&q=Probing+the+molecular+basis+for+signal+transduction+through+the+Zinc-Activated+Channel+%28ZAC%29&btnG=	266	286
P46098	5-hydroxytryptamine receptor 3A	HTR3A (5HT3R, HTR3)	Tclin	478	5-HT3 receptor	LGIC	Cys-loop	5-HT3 receptor		pore-forming	cation, non-selective(*)	ligand-gated(serotonin)	PMID: 17392525	receptors for 5-hydroxytryptamine (serotonin). This receptor is a ligand-gated ion channel, which when activated causes fast, depolarizing responses. It is a cation-specific, but otherwise relatively nonselective, ion channel.	No	Neur_channel, 5HT3	no		RIC3		AF-P46098-F1	164	475	311	Yes	164	305	4	4	2	4	4	242	475	T:242-268,T:274-292,T:303-321,T:456-475	https://www.ncbi.nlm.nih.gov/pmc/articles/PMC6485434/	274	292
O95264	5-hydroxytryptamine receptor 3B	HTR3B	Tchem	441	5-HT3 receptor	LGIC	Cys-loop	5-HT3 receptor		pore-forming	cation, non-selective(*)	ligand-gated(serotonin)	PMID: 17392525	receptors for 5-hydroxytryptamine (serotonin). This receptor is a ligand-gated ion channel, which when activated causes fast, depolarizing responses. It is a cation-specific, but otherwise relatively nonselective, ion channel.	No	Neur_channel, 5HT3	no				AF-O95264-F1	162	435	273	Yes	162	427	4	4	2	4	4	239	435	T:239-259,T:269-286,T:304-324,T:415-435	https://www.ncbi.nlm.nih.gov/pmc/articles/PMC6485434/	269	286
Q8WXA8	5-hydroxytryptamine receptor 3C	HTR3C	Tchem	447	5-HT3 receptor	LGIC	Cys-loop	5-HT3 receptor		pore-forming	cation, non-selective(*)	ligand-gated(serotonin)	PMID: 12801637	receptors for 5-hydroxytryptamine (serotonin). This receptor is a ligand-gated ion channel, which when activated causes fast, depolarizing responses. It is a cation-specific, but otherwise relatively nonselective, ion channel.	No	Neur_channel	no				AF-Q8WXA8-F1	169	445	276	Yes	169	312	4	4	2	4	4	249	445	T:249-269,T:283-303,T:307-329,T:425-445	https://www.ncbi.nlm.nih.gov/pmc/articles/PMC6485434/	283	303
Q70Z44	5-hydroxytryptamine receptor 3D	HTR3D	Tchem	454	5-HT3 receptor	LGIC	Cys-loop	5-HT3 receptor		pore-forming	cation, non-selective(*)	ligand-gated(serotonin)	PMID: 12801637	receptors for 5-hydroxytryptamine (serotonin). This receptor is a ligand-gated ion channel, which when activated causes fast, depolarizing responses. It is a cation-specific, but otherwise relatively nonselective, ion channel.	No	Neur_channel	no				AF-Q70Z44-F1	233	452	219	Yes	251	300	4	4	2	4	4	233	452	T:233-253,T:265-285,T:307-327,T:432-452	https://www.ncbi.nlm.nih.gov/pmc/articles/PMC6485434/	265	285
A5X5Y0	5-hydroxytryptamine receptor 3E	HTR3E	Tchem	456	5-HT3 receptor	LGIC	Cys-loop	5-HT3 receptor		pore-forming	cation, non-selective(*)	ligand-gated(serotonin)	PMID: 17392525	receptors for 5-hydroxytryptamine (serotonin). This receptor is a ligand-gated ion channel, which when activated causes fast, depolarizing responses. It is a cation-specific, but otherwise relatively nonselective, ion channel.	No	Neur_channel	no				AF-A5X5Y0-F1	169	454	285	Yes	169	369	4	4	2	4	4	249	454	T:249-269,T:283-303,T:308-328,T:434-454	https://www.ncbi.nlm.nih.gov/pmc/articles/PMC6485434/	283	303
P02708	Acetylcholine receptor subunit alpha	CHRNA1 (ACHRA, CHNRA)	Tclin	457	nACh receptor	LGIC	Cys-loop	nACh receptor		pore-forming	sodium(*)	ligand-gated(acetylocholine)	PMID: 33324158, PMID: 24050525	Upon acetylcholine binding, the AChR responds by an extensive change in conformation that affects all subunits and leads to opening of an ion-conducting channel across the plasma membrane.	No	Neur_channel	no			5HBT		233	448	215	Yes	1	195	4	4	2	4	4	233	448	T:233-253,T:265-285,T:297-317,T:428-448	https://www.nature.com/articles/nature01748	265	285
Q15822	Neuronal acetylcholine receptor subunit alpha-2	CHRNA2	Tchem	529	nACh receptor	LGIC	Cys-loop	nACh receptor		pore-forming	non-selective(*)	ligand-gated(acetylocholine)	PMID: 27493220, PMID: 26472524	After binding acetylcholine, the AChR responds by an extensive change in conformation that affects all subunits and leads to opening of an ion-conducting channel across the plasma membrane.	No	Neur_channel	no			5FJV		265	521	256	Yes	35	112	4	4	2	4	4	265	521	T:265-289,T:297-315,T:331-352,T:503-521	https://www.nature.com/articles/nature01748	297	315
P32297	Neuronal acetylcholine receptor subunit alpha-3	CHRNA3 (NACHRA3)	Tclin	505	nACh receptor	LGIC	Cys-loop	nACh receptor		pore-forming	sodium, potassium, calcium(*)	ligand-gated(acetylocholine)	PMID: 16120769, PMID: 26472524	Upon acetylcholine binding, the AChR responds by an extensive change in conformation that affects all subunits and leads to opening of an ion-conducting channel across the plasma membrane.	No	Neur_channel	no		LYPD6, RIC3	6PV8		237	497	260	Yes	237	255	4	4	2	4	4	241	497	T:241-265,T:273-291,T:307-328,T:478-497	https://www.nature.com/articles/nature01748	273	291
P43681	Neuronal acetylcholine receptor subunit alpha-4	CHRNA4 (NACRA4)	Tclin	627	nACh receptor	LGIC	Cys-loop	nACh receptor		pore-forming	sodium, potassium, calcium(*)	ligand-gated(acetylocholine)	PMID: 22361591, PMID: 26472524	permeable to sodium ions	No	Neur_channel	no		LYPD6, RIC3, MII, PnIA, GID	6USF		243	619	376	Yes	7	451	4	4	2	4	4	243	619	T:243-267,T:275-293,T:309-330,T:601-619	https://www.nature.com/articles/nature01748	275	293
P30532	Neuronal acetylcholine receptor subunit alpha-5	CHRNA5 (NACHRA5)	Tbio	468	nACh receptor	LGIC	Cys-loop	nACh receptor		pore-forming	sodium, potassium, calcium(*)	ligand-gated(acetylocholine)(*)	PMID: 25313161, PMID: 26472524	Upon acetylcholine binding, the AChR responds by an extensive change in conformation that affects all subunits and leads to opening of an ion-conducting channel across the plasma membrane.	No	Neur_channel	no		LYPD6		AF-P30532-F1	255	451	196	Yes			4	4	2	4	4	255	451	T:255-275,T:282-302,T:317-337,T:430-451	https://www.nature.com/articles/nature01748	282	302
Q15825	Neuronal acetylcholine receptor subunit alpha-6	CHRNA6	Tchem	494	nACh receptor	LGIC	Cys-loop	nACh receptor		pore-forming	non-selective(*)	ligand-gated(acetylocholine)(*)	PMID: 27344019, PMID: 26472524	After binding acetylcholine, the AChR responds by an extensive change in conformation that affects all subunits and leads to opening of an ion-conducting channel across the plasma membrane.	No	Neur_channel	no		LYPD6		AF-Q15825-F1	240	484	244	Yes			4	4	2	4	4	240	484	T:240-264,T:272-290,T:306-327,T:466-484	https://www.nature.com/articles/nature01748	272	290
P36544	Neuronal acetylcholine receptor subunit alpha-7	CHRNA7 (NACHRA7)	Tchem	502	nACh receptor	LGIC	Cys-loop	nACh receptor		pore-forming	sodium, potassium, calcium(*)	ligand-gated(acetylocholine)	PMID: 33324158, PMID: 26472524	The channel is blocked by alpha-bungarotoxin.	No	Neur_channel	no		LYPD6, RIC3, RgIA, ImI, ImII, CANX	7KOQ		231	490	259	Yes	8	428	4	4	2	4	4	231	490	T:231-255,T:262-280,T:296-317,T:470-490	https://www.nature.com/articles/nature01748	262	280
Q9UGM1	Neuronal acetylcholine receptor subunit alpha-9	CHRNA9 (NACHRA9)	Tchem	479	nACh receptor	LGIC	Cys-loop	nACh receptor		pore-forming	calcium(*)	ligand-gated(acetylocholine)(*)	PMID: 11752216	The channel is permeable to a range of divalent cations including calcium	No	Neur_channel, LG_TM	no			4UY2		238	476	238	Yes	33	119	4	4	2	4	4	238	476	T:238-262,T:269-287,T:302-323,T:458-476	https://www.nature.com/articles/nature01748	269	287
Q9GZZ6	Neuronal acetylcholine receptor subunit alpha-10	CHRNA10 (NACHRA10)	Tchem	450	nACh receptor	LGIC	Cys-loop	nACh receptor		pore-forming	calcium(*)	ligand-gated(acetylocholine)(*)	PMID: 11752216	The channel is permeable to a range of divalent cations including calcium	No	Neur_channel, LG_TM	no		GeXXA, RgIA		AF-Q9GZZ6-F1	238	449	211	Yes			4	4	2	4	4	238	449	T:238-258,T:268-288,T:302-322,T:429-449	https://www.nature.com/articles/nature01748	268	288
P11230	Acetylcholine receptor subunit beta	CHRNB1 (ACHRB, CHRNB)	Tclin	501	nACh receptor	LGIC	Cys-loop	nACh receptor		pore-forming	sodium(*)	ligand-gated(acetylocholine)	PMID: 33324158, PMID: 24050525	Upon acetylcholine binding, the AChR responds by an extensive change in conformation that affects all subunits and leads to opening of an ion-conducting channel across the plasma membrane permeable to sodium ions	No	Neur_channel	no				AF-P11230-F1	245	488	243	Yes			4	4	2	4	4	245	488	T:245-269,T:277-295,T:311-332,T:470-488	https://www.nature.com/articles/nature01748	277	295
P17787	Neuronal acetylcholine receptor subunit beta-2	CHRNB2	Tclin	502	nACh receptor	LGIC	Cys-loop	nACh receptor		pore-forming	sodium, potassium, calcium(*)	ligand-gated(acetylocholine)	PMID: 22361591, PMID: 26472524	Upon acetylcholine binding, the AChR responds by an extensive change in conformation that affects all subunits and leads to opening of an ion-conducting channel across the plasma membrane.	No	Neur_channel	no		LYPD6, RIC3	6USF		234	478	244	Yes	7	451	4	4	2	4	4	234	478	T:234-258,T:266-284,T:300-321,T:459-478	https://www.nature.com/articles/nature01748	266	284
Q05901	Neuronal acetylcholine receptor subunit beta-3	CHRNB3	Tchem	458	nACh receptor	LGIC	Cys-loop	nACh receptor		pore-forming	non-selective(*)	ligand-gated(acetylocholine)(*)	PMID: 35889515, PMID: 9272574	After binding acetylcholine, the AChR responds by an extensive change in conformation that affects all subunits and leads to opening of an ion-conducting channel across the plasma membrane.	No	Neur_channel	no			8A5U		233	447	214	Yes	59	121	4	4	2	4	4	233	447	T:233-257,T:265-282,T:299-320,T:429-447	https://www.nature.com/articles/nature01748	265	282
P30926	Neuronal acetylcholine receptor subunit beta-4	CHRNB4	Tclin	498	nACh receptor	LGIC	Cys-loop	nACh receptor		pore-forming	sodium, potassium, calcium(*)	ligand-gated(acetylocholine)(*)	PMID: 16120769, PMID: 26472524	Upon acetylcholine binding, the AChR responds by an extensive change in conformation that affects all subunits and leads to opening of an ion-conducting channel across the plasma membrane.	No	Neur_channel	no		LYPD6, RIC3	6PV8		237	481	244	Yes	237	255	4	4	2	4	4	237	481	T:237-257,T:266-286,T:299-319,T:461-481	https://www.nature.com/articles/nature01748	266	286
Q07001	Acetylcholine receptor subunit delta	CHRND (ACHRD)	Tclin	517	nACh receptor	LGIC	Cys-loop	nACh receptor		pore-forming	non-selective(*)	ligand-gated(acetylocholine)	PMID: 33324158, PMID: 9272574	After binding acetylcholine, the AChR responds by an extensive change in conformation that affects all subunits and leads to opening of an ion-conducting channel across the plasma membrane.	No	Neur_channel	no				AF-Q07001-F1	246	490	244	Yes			4	4	2	4	4	246	490	T:246-270,T:278-299,T:312-333,T:472-490	https://www.nature.com/articles/nature01748	278	299
Q04844	Acetylcholine receptor subunit epsilon	CHRNE (ACHRE)	Tclin	493	nACh receptor	LGIC	Cys-loop	nACh receptor		pore-forming	non-selective(*)	ligand-gated(acetylocholine)	PMID: 33324158, PMID: 9272574	After binding acetylcholine, the AChR responds by an extensive change in conformation that affects all subunits and leads to opening of an ion-conducting channel across the plasma membrane	No	Neur_channel	no				AF-Q04844-F1	240	480	240	Yes			4	4	2	4	4	240	480	T:240-264,T:273-291,T:307-328,T:457-480	https://www.nature.com/articles/nature01748	273	291
P07510	Acetylcholine receptor subunit gamma	CHRNG (ACHRG)	Tclin	517	nACh receptor	LGIC	Cys-loop	nACh receptor		pore-forming	sodium(*)	ligand-gated(acetylocholine)	PMID: 33324158, PMID: 24050525	Upon acetylcholine binding, the AChR responds by an extensive change in conformation that affects all subunits and leads to opening of an ion-conducting channel across the plasma membrane.	No	Neur_channel	no				AF-P07510-F1	241	495	254	Yes			4	4	2	4	4	241	495	T:241-265,T:275-293,T:309-330,T:475-495	https://www.nature.com/articles/nature01748	275	293
P14867	Gamma-aminobutyric acid receptor subunit alpha-1	GABRA1	Tclin	456	GABA_A receptor	LGIC	Cys-loop	GABAA receptor		pore-forming	chloride	ligand-gated(GABA)	PMID: 2465923	Ligand-gated chloride channel which is a component of the heteropentameric receptor for GABA, the major inhibitory neurotransmitter in the brain (PubMed:23909897, PubMed:25489750, PubMed:29950725).Plays an important role in the formation of functional inhibitory GABAergic synapses in addition to mediating synaptic inhibition as a GABA-gated ion channel	No	GABBAA, Neur_channel, LG_TM	LGIC_ECD		UBQLN1, TRAK1, LHFPL4, NLGN2, SHISA7	6D6U		243	443	200	Yes	243	315	4	4	2	4	4	252	443	T:252-273,T:279-300,T:313-334,T:422-443	https://pubs.acs.org/doi/10.1021/acschemneuro.1c00151	279	300
P47869	Gamma-aminobutyric acid receptor subunit alpha-2	GABRA2	Tclin	451	GABA_A receptor	LGIC	Cys-loop	GABAA receptor		pore-forming	chloride	ligand-gated(GABA)	PMID: 25313161	Ligand-gated chloride channel which is a component of the heteropentameric receptor for GABA, the major inhibitory neurotransmitter in the brain	No	GABBAA, Neur_channel, LG_TM	LGIC_ECD		UBQLN1,LHFPL4, KIF21B, SHISA7		AF-P47869PF1	252	441	189	Yes			4	4	2	4	4	252	441	T:252-273,T:279-300,T:313-334,T:420-441	https://pubs.acs.org/doi/10.1021/acschemneuro.1c00151	279	300
P34903	Gamma-aminobutyric acid receptor subunit alpha-3	GABRA3	Tclin	492	GABA_A receptor	LGIC	Cys-loop	GABAA receptor		pore-forming	chloride	ligand-gated(GABA)(*)	PMID: 25313161	mediates neuronal inhibition by binding to the GABA/benzodiazepine receptor and opening an integral chloride channel.	No	GABBAA, Neur_channel, LG_TM	LGIC_ECD		UBQLN1, GPHN		AF-P34903-F1	277	479	202	Yes			4	4	2	4	4	277	479	T:277-298,T:304-325,T:338-359,T:458-479	https://pubs.acs.org/doi/10.1021/acschemneuro.1c00151	304	325
P48169	Gamma-aminobutyric acid receptor subunit alpha-4	GABRA4	Tclin	554	GABA_A receptor	LGIC	Cys-loop	GABAA receptor		pore-forming	chloride	ligand-gated(GABA)(*)	PMID: 25313161	mediates neuronal inhibition by binding to the GABA/benzodiazepine receptor and opening an integral chloride channel.	No	GABBAA, Neur_channel, LG_TM	LGIC_ECD			7QNA		259	543	284	Yes	49	438	4	4	2	4	4	259	543	T:259-280,T:285-306,T:318-340,T:524-543	https://pubs.acs.org/doi/10.1021/acschemneuro.1c00151	285	306
P31644	Gamma-aminobutyric acid receptor subunit alpha-5	GABRA5	Tclin	462	GABA_A receptor	LGIC	Cys-loop	GABAA receptor		pore-forming	chloride	ligand-gated(GABA)	PMID: 25313161	Ligand-gated chloride channel subunit which is a component of the heteropentameric receptor for GABA, the major inhibitory neurotransmitter in the brain	No	GABBAA, Neur_channel, LG_TM	LGIC_ECD			6A96		248	449	201	Yes	248	271	4	4	2	4	4	260	449	T:260-281,T:286-307,T:319-341,T:428-449	https://pubs.acs.org/doi/10.1021/acschemneuro.1c00151	286	307
Q16445	Gamma-aminobutyric acid receptor subunit alpha-6	GABRA6	Tclin	453	GABA_A receptor	LGIC	Cys-loop	GABAA receptor		pore-forming	chloride	ligand-gated(GABA)(*)	PMID: 25313161	mediates neuronal inhibition by binding to the GABA/benzodiazepine receptor and opening an integral chloride channel	No	GABBAA, Neur_channel, LG_TM	LGIC_ECD		UBQLN1		AF-Q16445-F1	243	441	198	Yes			4	4	2	4	4	243	441	T:243-264,T:269-290,T:301-324,T:420-441	https://pubs.acs.org/doi/10.1021/acschemneuro.1c00151	269	290
P18505	Gamma-aminobutyric acid receptor subunit beta-1	GABRB1	Tclin	474	GABA_A receptor	LGIC	Cys-loop	GABAA receptor		pore-forming	chloride	ligand-gated(GABA)	PMID: 1655634	Component of the heteropentameric receptor for GABA, the major inhibitory neurotransmitter in the vertebrate brain. Functions as ligand-gated chloride channel.	No	GABBAA, Neur_channel, LG_TM	LGIC_ECD		KCTD8, KCTD12 and KCTD16, UBQLN1		AF-P18505-F1	246	473	227	Yes			4	4	1	4	4	246	473	T:246-267,T:271-293,T:305-327,T:452-473	https://pubs.acs.org/doi/10.1021/acschemneuro.1c00151	271	293
P47870	Gamma-aminobutyric acid receptor subunit beta-2	GABRB2	Tclin	512	GABA_A receptor	LGIC	Cys-loop	GABAA receptor		pore-forming	chloride	ligand-gated(GABA)	PMID: 25313161	Ligand-gated chloride channel which is a component of the heteropentameric receptor for GABA, the major inhibitory neurotransmitter in the brain	No	GABBAA, Neur_channel, LG_TM	LGIC_ECD		UBQLN1, KCTD8, KCTD12, KCTD16, KIF21B	6D6U		245	511	266	Yes	253	315	4	4	2	4	4	245	511	T:245-266,T:270-292,T:304-326,T:490-511	https://pubs.acs.org/doi/10.1021/acschemneuro.1c00151	270	292
P28472	Gamma-aminobutyric acid receptor subunit beta-3	GABRB3	Tclin	473	GABA_A receptor	LGIC	Cys-loop	GABAA receptor		pore-forming	chloride	ligand-gated(GABA)	PMID: 18281286	Ligand-gated chloride channel which is a component of the heteropentameric receptor for GABA, the major inhibitory neurotransmitter in the brain	No	GABBAA, Neur_channel, LG_TM	LGIC_ECD		UBQLN1, KIF21B, GIT1	6HUK		246	472	226	Yes	248	281	4	4	2	4	4	246	472	T:246-267,T:271-293,T:305-327,T:451-472	https://www.researchgate.net/figure/GABAA-receptor-structure-and-neuronal-localizationa-GABA-aminobutyric-acid-type-A_fig10_5471135	271	293
O14764	Gamma-aminobutyric acid receptor subunit delta	GABRD	Tclin	452	GABA_A receptor	LGIC	Cys-loop	GABAA receptor		pore-forming	chloride	ligand-gated(GABA)	PMID: 34633442	GABA, the major inhibitory neurotransmitter in the vertebrate brain, mediates neuronal inhibition by binding to the GABA/benzodiazepine receptor and opening an integral chloride channel.	No	GABBAA, Neur_channel, LG_TM	LGIC_ECD			7QND		249	452	203	Yes	49	300	4	4	2	4	4	249	452	T:249-271,T:275-297,T:309-331,T:430-452	https://pubs.acs.org/doi/10.1021/acschemneuro.1c00151	275	297
P78334	Gamma-aminobutyric acid receptor subunit epsilon	GABRE	Tclin	506	GABA_A receptor	LGIC	Cys-loop	GABAA receptor		pore-forming	chloride	ligand-gated(GABA)(*)	PMID: 9339354	mediates neuronal inhibition by binding to the GABA/benzodiazepine receptor and opening an integral chloride channel	No	GABBAA, Neur_channel, LG_TM	LGIC_ECD				AF-P78334-F1	254	506	252	Yes			4	4	2	4	4	254	506	T:254-274,T:281-301,T:344-364,T:486-506	https://pubs.acs.org/doi/10.1021/acschemneuro.1c00151	281	301
Q8N1C3	Gamma-aminobutyric acid receptor subunit gamma-1	GABRG1	Tclin	465	GABA_A receptor	LGIC	Cys-loop	GABAA receptor		pore-forming	chloride	ligand-gated(GABA)	PMID: 24425869	mediates neuronal inhibition by binding to the GABA/benzodiazepine receptor and opening an integral chloride channel	No	GABBAA, Neur_channel, LG_TM	LGIC_ECD				AF-Q8N1C3-F1	273	465	192	Yes			4	4	2	4	4	273	465	T:273-294,T:299-320,T:332-354,T:445-465	https://pubs.acs.org/doi/10.1021/acschemneuro.1c00151	299	320
P18507	Gamma-aminobutyric acid receptor subunit gamma-2	GABRG2	Tclin	467	GABA_A receptor	LGIC	Cys-loop	GABAA receptor		pore-forming	chloride	ligand-gated(GABA)	PMID: 23909897	Plays an important role in the formation of functional inhibitory GABAergic synapses in addition to mediating synaptic inhibition as a GABA-gated ion channel	No	GABBAA, Neur_channel, LG_TM	LGIC_ECD		GABARAP, KIF21B	6D6T / 6D6U		248	474	226	Yes	248	285	4	4	2	4	4	274	474	T:274-296,T:300-322,T:334-356,T:452-474	https://pubs.acs.org/doi/10.1021/acschemneuro.1c00151	300	322
Q99928	Gamma-aminobutyric acid receptor subunit gamma-3	GABRG3	Tclin	467	GABA_A receptor	LGIC	Cys-loop	GABAA receptor		pore-forming	chloride	ligand-gated(GABA)(*)	PMID: 8719414	mediates neuronal inhibition by binding to the GABA/benzodiazepine receptor and opening an integral chloride channel	No	GABBAA, Neur_channel, LG_TM	LGIC_ECD				AF-Q99928-F1	255	467	212	Yes			4	4	2	4	4	255	467	T:255-277,T:281-303,T:315-337,T:444-467	https://pubs.acs.org/doi/10.1021/acschemneuro.1c00151	281	303
O00591	Gamma-aminobutyric acid receptor subunit pi	GABRP	Tclin	440	GABA_A receptor	LGIC	Cys-loop	GABAA receptor		pore-forming	chloride	ligand-gated(GABA)	PMID: 16187283	GABA, the major inhibitory neurotransmitter in the vertebrate brain, mediates neuronal inhibition by binding to the GABA/benzodiazepine receptor and opening an integral chloride channel.	No	GABBAA, Neur_channel, LG_TM	no				AF-O00591-F1	243	438	195	Yes			4	4	2	4	4	243	438	T:243-266,T:270-292,T:305-327,T:417-438	https://pubs.acs.org/doi/10.1021/acschemneuro.1c00151	270	292
Q9UN88	Gamma-aminobutyric acid receptor subunit theta	GABRQ	Tclin	632	GABA_A receptor	LGIC	Cys-loop	GABAA receptor		pore-forming	chloride	ligand-gated(GABA)	PMID: 10449790	mediates neuronal inhibition by binding to the GABA/benzodiazepine receptor and opening an integral chloride channel	No	GABBAA, Neur_channel, LG_TM	LGIC_ECD				AF-Q9UN88-F1	269	632	363	Yes			4	4	2	3	3	269	632	T:269-289,T:327-347,T:612-632	https://pubs.acs.org/doi/10.1021/acschemneuro.1c00151	327	347
P24046	Gamma-aminobutyric acid receptor subunit rho-1	GABRR1	Tchem	479	GABA_A receptor	LGIC	Cys-loop	GABAA receptor		pore-forming	chloride	ligand-gated(GABA)	PMID: 1849271	GABA, the major inhibitory neurotransmitter in the vertebrate brain, mediates neuronal inhibition by binding to the GABA/benzodiazepine receptor and opening an integral chloride channel. Rho-1 GABA receptor could play a role in retinal neurotransmission.	No	GABBAA, Neur_channel, LG_TM	LGIC_ECD		SQSTM1		AF-P24046-F1	282	479	197	Yes			4	4	2	4	4	282	479	T:282-305,T:309-331,T:343-365,T:458-479	https://pubs.acs.org/doi/10.1021/acschemneuro.1c00151	309	331
P28476	Gamma-aminobutyric acid receptor subunit rho-2	GABRR2	Tchem	465	GABA_A receptor	LGIC	Cys-loop	GABAA receptor		pore-forming	chloride	ligand-gated(GABA)(*)	PMID: 1315307	GABA, the major inhibitory neurotransmitter in the vertebrate brain, mediates neuronal inhibition by binding to the GABA/benzodiazepine receptor and opening an integral chloride channel. Rho-2 GABA receptor could play a role in retinal neurotransmission.	No	GABBAA, Neur_channel, LG_TM	LGIC_ECD		SQSTM1		AF-P28476-F1	261	464	203	Yes			4	4	2	4	4	261	464	T:261-281,T:294-314,T:326-346,T:444-464	https://www.researchgate.net/figure/GABAA-receptor-structure-and-neuronal-localizationa-GABA-aminobutyric-acid-type-A_fig10_5471135	294	314
A8MPY1	Gamma-aminobutyric acid receptor subunit rho-3	GABRR3	Tbio	467	GABA_A receptor	LGIC	Cys-loop	GABAA receptor		pore-forming	chloride(*)	ligand-gated(GABA)(*)	PMID: 10542332	GABA, the major inhibitory neurotransmitter in the vertebrate brain, mediates neuronal inhibition by binding to the GABA/benzodiazepine receptor and opening an integral chloride channel. (uterus)	No	Neur_channel, LG_TM	5HT3, LGIC_ECD				AF-A8MPY1-F1	267	467	200	Yes	266	467	4	4	2	4	4	267	467	T:267-287,T:300-320,T:332-352,T:447-467	https://www.nature.com/articles/nature01748	300	320
P23415	Glycine receptor subunit alpha-1	GLRA1	Tclin	457	Glycine receptor	LGIC	Cys-loop	Glycine receptor		pore-forming	chloride(*)	ligand-gated(glycine)	PMID: 22715885	triggered by extracellular glycine, also triggered by taurine and beta-alanine	No	Glycine, Neur_channel, LG_TM	LGIC_ECD	GLRB		4X5T		250	446	196	Yes	250	271	3	3	2	4	4	251	446	T:251-272,T:278-298,T:310-330,T:426-446	https://www.nature.com/articles/nature14853	278	298
P23416	Glycine receptor subunit alpha-2	GLRA2	Tchem	452	Glycine receptor	LGIC	Cys-loop	Glycine receptor		pore-forming	chloride(*)	ligand-gated(glycine, taurine, beta-alanine)(*)	PMID: 16144831	triggered by extracellular glycine, also triggered by taurine and beta-alanine	No	Glycine, Neur_channel, LG_TM	LGIC_ECD	GLRB		5BKG / 7L31		257	441	184	Yes	53	304	4	4	2	4	4	257	441	T:257-278,T:284-304,T:316-336,T:421-441	https://www.nature.com/articles/nature14853	284	304
O75311	Glycine receptor subunit alpha-3	GLRA3	Tchem	464	Glycine receptor	LGIC	Cys-loop	Glycine receptor		pore-forming	chloride(*)	ligand-gated	PMID: 26416729	ligand-gated chloride channels. Channel opening is triggered by extracellular glycine. Channel characteristics depend on the subunit composition; heteropentameric channels display faster channel closure	No	Glycine, Neur_channel, LG_TM	LGIC_ECD	GLRB		5TIO		249	451	202	Yes	249	265	4	4	2	4	4	256	451	T:256-277,T:283-303,T:315-335,T:431-451	https://www.nature.com/articles/nature14853	283	303
P48167	Glycine receptor subunit beta	GLRB	Tclin	497	Glycine receptor	LGIC	Cys-loop	Glycine receptor		pore-forming	chloride(*)	ligand-gated(*)	PMID: 8717357	GLRB does not form ligand-gated ion channels by itself, but is part of heteromeric ligand-gated chloride channels. Triggered by extracellular glycine	No	Glycine, Neur_channel, LG_TM	LGIC_ECD		GPHN	5BKG / 7L31		269	496	227	Yes	53	304	4	4	2	4	4	269	496	T:269-290,T:296-316,T:328-348,T:476-496	https://www.nature.com/articles/nature14853	296	316
P78348	Acid-sensing ion channel 1	ASIC1 (ACCN2, BNAC2)	Tchem	528	ASICs	LGIC		ASICs		pore-forming	sodium(*)	ligand-gated(acid), proton-gated	PMID: 29513651	Isoform 2 and isoform 3 function as proton-gated sodium channels; they are activated by a drop of the extracellular pH and then become rapidly desensitized	No	ENaC, GAS, ASC	no			7CFT		46	454	452	Yes	2	418	0	0	1|2	2	2	46	454	T:46-69,T:428-454	https://www.nature.com/articles/nature14853	46	69	428	454
Q16515	Acid-sensing ion channel 2	ASIC2 (ACCN, ACCN1, BNAC1, MDEG)	Tchem	512	ASICs	LGIC		ASICs		pore-forming	sodium, potassium, lithuim(*)	ligand-gated(acid)(*)	PMID: 29513651	Cation channel with high affinity for sodium. Also permeable for Li+ and K+.	No	ENaC, GAS, ASC	no			6L6P		38	448	410	Yes	78	413	0	0	1|2	2	2	38	448	T:38-58,T:428-448	https://www.nature.com/articles/nature14853	38	58	428	448
Q9UHC3	Acid-sensing ion channel 3	ASIC3 (ACCN3, SLNAC1, TNAC1)	Tchem	531	ASICs	LGIC		ASICs		pore-forming	sodium(*)	ligand-gated(acid)(*)	PMID: 29513651	Cation channel with high affinity for sodium, which is gated by extracellular protons	No	ENaC, ASC	PDZ binding		LIN7B, MAGI1/BAIAP1, GOPC, STOM, DLG4		AF-Q9UHC3-F1	44	526	482	Yes	69	526	0	0	1|2	2	2	44	460	T:44-61,T:442-460	https://www.nature.com/articles/nature14853	44	61	442	460
Q96FT7	Acid-sensing ion channel 4	ASIC4 (ACCN4)	Tbio	539	ASICs	LGIC		ASICs		pore-forming	sodium(*)	ligand-gated(acid)(*)	PMID: 29513651	Probable cation channel with high affinity for sodium. In vitro, has no proton-gated channel activity	No	ENaC, GAS, ASC	no				AF-Q96FT7-F1	69	459	390	Yes			0	0	1|2	2	2	69	459	T:69-89,T:439-459	https://www.nature.com/articles/nature14853	69	89	439	459
Q9NY37	Acid-sensing ion channel 5	ASIC5 (ACCN5, HINAC)	Tbio	505	ASICs	LGIC		ASICs		pore-forming	sodium(*)	ligand-gated(acid)(*)	PMID: 29513651	Cation channel that gives rise to very low constitutive currents in the absence of activation. The activated channel exhibits selectivity for sodium, and is inhibited by amiloride	No	ENaC, ASC	no				AF-Q9NY37-F1	62	480	475	Yes	5	378	2	2	1|2	2	2	62	480	T:62-82,T:460-480	https://www.nature.com/articles/nature14853	62	82	460	480
P37088	Amiloride-sensitive sodium channel subunit alpha	SCNN1A (SCNN1)	Tclin	669	ENaC	LGIC		ENaC		pore-forming	sodium	ligand-gated(*)	PMID: 25313161, PMID: 12087134	Sodium permeable non-voltage-sensitive ion channel inhibited by the diuretic amiloride.	No	ENaC, ASC	WW binding		NEDD4, NEDD4L, WWP1, WWP2, PCSK9	6BQN		60	622	562	Yes	60	622	1	1	1|2	2	2	86	583	T:86-106,T:563-583	https://www.ncbi.nlm.nih.gov/pmc/articles/PMC3191808/	86	106	563	583
P51168	Amiloride-sensitive sodium channel subunit beta	SCNN1B	Tclin	640	ENaC	LGIC		ENaC		pore-forming	sodium	ligand-gated	PMID: 16423824	Sodium permeable non-voltage-sensitive ion channel inhibited by the diuretic amiloride.	No	ENaC, ASC	WW binding		NEDD4, NEDD4L, WWP1, WWP2, PCSK9, BPIFA1	6WTH		51	553	502	Yes	100	509	1	1	1|2	2	2	51	553	T:51-71,T:533-553	https://www.ncbi.nlm.nih.gov/pmc/articles/PMC3191808/	51	71	533	553
P51172	Amiloride-sensitive sodium channel subunit delta	SCNN1D (DNACH)	Tbio	802	ENaC	LGIC		ENaC		pore-forming	sodium	ligand-gated(*)	PMID: 16423824	Sodium permeable non-voltage-sensitive ion channel inhibited by the diuretic amiloride.	No	ENaC, ASC	no				AF-P51172-F1	251	715	464	Yes			0	0	1|2	2	2	251	715	T:251-271,T:695-715	https://www.ncbi.nlm.nih.gov/pmc/articles/PMC3191808/	251	271	695	715
P51170	Amiloride-sensitive sodium channel subunit gamma	SCNN1G	Tclin	649	ENaC	LGIC		ENaC		pore-forming	sodium	ligand-gated(*)	PMID: 16423824	Sodium permeable non-voltage-sensitive ion channel inhibited by the diuretic amiloride.	No	ENaC, ASC	WW binding		NEDD4, NEDD4L, WWP1, WWP2, PCSK9	6BQN		56	622	566	Yes	60	622	2	2	1|2	2	2	56	562	T:56-76,T:542-562	https://www.ncbi.nlm.nih.gov/pmc/articles/PMC3191808/	56	76	542	562
P42261	Glutamate receptor 1	GRIA1 (GLUH1, GLUR1)	Tclin	906	Ionotropic glutamate receptor	LGIC		Ionotropic glutamate receptor	AMPA receptors	pore-forming	calcium(*)	ligand-gated(glutamate)(*)	PMID: 20716669, PMID: 29607422	Ionotropic glutamate receptor	No	Iono, Lig_chan, ANF	PBP		HIP1, RASGRF2, SYNDIG1, GRIA2, DLG1, PDLIM4, SNX27, SHANK3	6X5Q		537	826	289	Yes	42	202	3	3	2|3	5	3	537	826	T:537-557,I:585-600,I:601-603,T:610-630,T:806-826	https://pubs.acs.org/doi/10.1021/acs.biochem.7b00891	610	630	806	826
P42262	Glutamate receptor 2	GRIA2 (GLUR2)	Tclin	883	Ionotropic glutamate receptor	LGIC		Ionotropic glutamate receptor	AMPA receptors	pore-forming	sodium, potassium(*)	ligand-gated(glutamate)	PMID: 8003671, PMID: 10049997	Receptor for glutamate that functions as ligand-gated ion channel in the central nervous system	No	Iono, Lig_chan, ANF	PBP, M4		SYNDIG1, SNX27, OLFM2, AP4B1, AP4E1, AP4M1	2WJX		544	833	289	Yes	25	315	4	4	2|3	5	3	544	833	T:544-564,I:592-607,I:608-610,T:617-637,T:813-833	https://pubs.acs.org/doi/10.1021/acs.biochem.7b00891	617	637	813	833
P42263	Glutamate receptor 3	GRIA3 (GLUR3, GLURC)	Tclin	894	Ionotropic glutamate receptor	LGIC		Ionotropic glutamate receptor	AMPA receptors	pore-forming	calcium(*)	ligand-gated(glutamate)	PMID: 7918660, PMID: 29607422	Receptor for glutamate that functions as ligand-gated ion channel in the central nervous system	No	Iono, Lig_chan, ANF	PBP, M4		PRKCABP, GRIP1, GRIP2		AF-P42263-F1	553	844	291	Yes			4	4	2|3	5	3	553	844	T:553-573,I:603-618,I:619-621,T:628-648,T:824-844	https://www.sciencedirect.com/science/article/pii/S0166223602000103	628	648	824	844
P48058	Glutamate receptor 4	GRIA4 (GLUR4)	Tclin	902	Ionotropic glutamate receptor	LGIC		Ionotropic glutamate receptor	AMPA receptors	pore-forming	calcium(*)	ligand-gated(glutamate)	PMID: 8589990, PMID: 29607422	Receptor for glutamate that functions as ligand-gated ion channel in the central nervous system	No	Iono, Lig_chan, ANF	PBP, M4		EPB41L1, PRKCG		AF-P48058-F1	545	834	289	Yes			4	4	2|3	5	3	545	834	T:545-565,I:593-608,I:609-611,T:618-638,T:814-834	https://www.sciencedirect.com/science/article/pii/S0166223602000103	618	638	814	834
Q9ULK0	Glutamate receptor ionotropic, delta-1	GRID1 (KIAA1220)	Tbio	1009	Ionotropic glutamate receptor	LGIC		Ionotropic glutamate receptor	Delta receptors	pore-forming	non-selective cation(*)	ligand-gated(glutamate)	PMID: 34181979, PMID: 20055706	Receptor for glutamate.	No	Iono, Lig_chan, ANF	PBP		CBLN1, CBLN2		AF-Q9ULK0-F1	563	851	288	Yes			3	3	2|3	3	3	563	851	T:563-583,T:638-658,T:831-851	https://www.sciencedirect.com/science/article/pii/S0166223602000103	563	583	638	658
O43424	Glutamate receptor ionotropic, delta-2	GRID2 (GLURD2)	Tbio	1007	Ionotropic glutamate receptor	LGIC		Ionotropic glutamate receptor	Delta receptors	auxiliary			PMID: 27418511	Receptor for glutamate	Yes	Iono, Lig_chan, ANF	PDZ binding,		BECN1, GOPC, GRID2IP, SHANK1, SHANK2, CBLN2, CBLN4, CBLN1, EML2, MAGI2, AP4M1	5KCA					Yes	520	901	3	3	2|3	3	3	567	851	T:567-587,T:636-656,T:831-851	https://nyaspubs.onlinelibrary.wiley.com/doi/full/10.1196/annals.1300.003	636	656	831	851
P39086	Glutamate receptor ionotropic, kainate 1	GRIK1 (GLUR5)	Tclin	918	Ionotropic glutamate receptor	LGIC		Ionotropic glutamate receptor	Kainate receptors	pore-forming	calcium(*)	ligand-gated(glutamate)	PMID: 8260617, PMID: 29607422	Ionotropic glutamate receptor	No	Iono, Lig_chan, ANF	PBP		KLHL17	2ZNS		424	855	431	Yes	424	733	3	3	2|3	3	3	577	855	T:577-597,T:654-674,T:835-855	https://pubs.acs.org/doi/10.1021/acs.biochem.7b00891	654	674	835	855
Q13002	Glutamate receptor ionotropic, kainate 2	GRIK2 (GLUR6)	Tclin	908	Ionotropic glutamate receptor	LGIC		Ionotropic glutamate receptor	Kainate receptors	pore-forming	calcium, sodium(*)	ligand-gated	PMID: 7536611	Ionotropic glutamate receptor.	No	Iono, Lig_chan, ANF	PBP		DLG4, NETO2, KLHL17	3QXM		458	840	382	Yes	458	761	3	3	2|3	3	3	562	840	T:562-582,T:636-656,T:820-840	https://pubs.acs.org/doi/10.1021/acs.biochem.7b00891	636	656	820	840
Q13003	Glutamate receptor ionotropic, kainate 3	GRIK3 (GLUR7)	Tclin	919	Ionotropic glutamate receptor	LGIC		Ionotropic glutamate receptor	Kainate receptors	pore-forming	sodium, potassium(*)	ligand-gated	PMID: 22106181, PMID: 16361114	Receptor for glutamate that functions as ligand-gated ion channel in the central nervous system and plays an important role in excitatory synaptic transmission.	No	Iono, Lig_chan, ANF	PBP		PRKCABP, NETO2		AF-Q13003-F1	564	845	281	Yes			3	3	2|3	3	3	564	841	T:564-584,T:637-657,T:821-841	https://www.sciencedirect.com/science/article/pii/S0166223602000103	603	658	673	845
Q16099	Glutamate receptor ionotropic, kainate 4	GRIK4 (GRIK)	Tclin	956	Ionotropic glutamate receptor	LGIC		Ionotropic glutamate receptor	Kainate receptors	pore-forming	calcium(*)	ligand-gated(glutamate)	PMID: 8263508	Receptor for glutamate.	No	Iono, Lig_chan, ANF	PBP				AF-Q16099-F1	546	825	279	Yes			4	4	2|3	3	3	546	825	T:546-566,T:624-644,T:805-825	https://www.sciencedirect.com/science/article/pii/S0166223602000103	546	566	624	644
Q16478	Glutamate receptor ionotropic, kainate 5	GRIK5 (GRIK2)	Tclin	980	Ionotropic glutamate receptor	LGIC		Ionotropic glutamate receptor	Kainate receptors	pore-forming	calcium(*)	ligand-gated(glutamate)	PMID: 1321949	Receptor for glutamate.	No	Iono, Lig_chan, ANF	PBP				AF-Q1G478-F1	545	824	279	Yes			3	3	2|3	3	3	545	824	T:545-565,T:623-643,T:804-824	https://www.sciencedirect.com/science/article/pii/S0166223602000103	545	565	623	643
Q05586	Glutamate receptor ionotropic, NMDA 1	GRIN1 (NMDAR1)	Tclin	938	Ionotropic glutamate receptor	LGIC		Ionotropic glutamate receptor	NMDA receptors	pore-forming	calcium	ligand-gated(glutamate), voltage-dependent blockade	PMID: 7685113	Component of NMDA receptor complexes that function as heterotetrameric, ligand-gated ion channels with high calcium permeability and voltage-dependent sensitivity to magnesium.	No	Iono, Lig_chan, ANF, CaM_bdg	PBP		PPP2CB, SNX27, DLG4, MPDZ, LRFN1, LRFN2, MYZAP	6IRH		560	833	273	Yes	566	644	3	3	2|3	4	3	560	833	T:560-580,I:603-624,T:631-647,T:813-833	https://pubs.acs.org/doi/10.1021/acs.biochem.7b00891	631	647	813	833
Q12879	Glutamate receptor ionotropic, NMDA 2A	GRIN2A (NMDAR2A)	Tclin	1464	Ionotropic glutamate receptor	LGIC		Ionotropic glutamate receptor	NMDA receptors	pore-forming	calcium	ligand-gated	PubMed:8768735, PubMed:26919761, PubMed:26875626, PubMed:28105280	Component of NMDA receptor complexes that function as heterotetrameric, ligand-gated ion channels with high calcium permeability and voltage-dependent sensitivity to magnesium. Channel activation requires binding of the neurotransmitter glutamate to the epsilon subunit, glycine binding to the zeta subunit, plus membrane depolarization to eliminate channel inhibition by Mg2+	No	Lig_Chan, Ionotropic_Glu_rcpt	ANF	GRIN2A, GRIN2B, GRIN2C, GRIN2D, GRIN3A, GRIN3B	RPH3A, DLG4	6IRH		556	837	281	Yes			4	4		4	3	556	837	T:556-576,I:601-620,T:626-645,T:817-837
Q13224	Glutamate receptor ionotropic, NMDA 2B	GRIN2B (NMDAR2B)	Tclin	1484	Ionotropic glutamate receptor	LGIC		Ionotropic glutamate receptor	NMDA receptors	pore-forming	calcium	ligand-gated(glutamate), voltage-dependent blockade(*)	PMID: 7685113	Component of NMDA receptor complexes that function as heterotetrameric, ligand-gated ion channels with high calcium permeability and voltage-dependent sensitivity to magnesium.	No	Iono, Lig_chan, ANF	PBP, PDZ- binding		PATJ, DLG3, DLG4, HIP1, NETO1, MAGI3, DAPK1, PRR7, CAMK2A, TMEM25	7EU8		538	837	299	Yes	538	787	4	4	2|3	4	3	558	837	T:558-576,I:604-623,T:631-646,T:818-837	https://pubs.acs.org/doi/10.1021/acs.biochem.7b00891	631	646	818	837
Q14957	Glutamate receptor ionotropic, NMDA 2C	GRIN2C (NMDAR2C)	Tclin	1233	Ionotropic glutamate receptor	LGIC		Ionotropic glutamate receptor	NMDA receptors	pore-forming	sodium, calcium(*)	ligand-gated(glutamate), voltage-dependent blockade	PMID: 26875626, Lau, A. Y., & Salazar, H. (2019). Ionotropic Glutamate Receptor NMDA Type Subunit 2C (GRIN2C). In Handbook of Experimental Pharmacology (pp. 185-201). Springer, Cham.	Component of NMDA receptor complexes that function as heterotetrameric, ligand-gated ion channels with high calcium permeability and voltage-dependent sensitivity to magnesium.	No	Iono, Lig_chan, ANF	PBP, PDZ- binding		PATJ, DLG4, SNX27	8e+97		555	834	279	Yes	94	795	4	4	2|3	4	3	555	834	T:555-573,I:601-620,T:628-643,T:815-834	https://www.sciencedirect.com/science/article/pii/S0166223602000103	628	643	815	834
O15399	Glutamate receptor ionotropic, NMDA 2D	GRIN2D (GluN2D, NMDAR2D)	Tclin	1336	Ionotropic glutamate receptor	LGIC		Ionotropic glutamate receptor	NMDA receptors	pore-forming	calcium	ligand-gated	PMID: 9489750	Component of NMDA receptor complexes that function as heterotetrameric, ligand-gated ion channels with high calcium permeability and voltage-dependent sensitivity to magnesium.	No	Iono, Lig_chan, ANF	PBP			7YFM		585	864	279	Yes	130	829	4	4	2|3	4	3	585	864	T:585-603,I:631-650,T:658-673,T:845-864	https://www.guidetopharmacology.org/GRAC/FamilyDisplayForward?familyId=75	658	673	845	864
Q8TCU5	Glutamate receptor ionotropic, NMDA 3A	GRIN3A (KIAA1973)	Tclin	1115	Ionotropic glutamate receptor	LGIC		Ionotropic glutamate receptor	NMDA receptors	pore-forming	calcium, magnesium, sodium(*)	ligand-gated(glutamate)	PMID: 11735224, PMID: 1350383	NMDA receptor subtype of glutamate-gated ion channels with reduced single-channel conductance, low calcium permeability and low voltage-dependent sensitivity to magnesium. Mediated by glycine.	No	Iono, Lig_chan	PBP		GIT1		AF-Q8TCU5-F1	675	951	276	Yes			4	4	2|3	3	3	675	951	T:675-695,T:749-769,T:931-951	https://pubs.acs.org/doi/10.1021/acs.biochem.7b00891	749	769	931	951
O60391	Glutamate receptor ionotropic, NMDA 3B	GRIN3B	Tclin	1043	Ionotropic glutamate receptor	LGIC		Ionotropic glutamate receptor	NMDA receptors	pore-forming	calcium(*)	ligand-gated(glutamate), voltage-dependent blockade(*)	PMID: 32786006	NMDA receptor subtype of glutamate-gated ion channels with reduced single-channel conductance, low calcium permeability and low voltage-dependent sensitivity to magnesium	No	Iono, Lig_chan	PBP				AF-O60391-F1	565	851	286	Yes			4	4	2|3	3	3	565	851	T:565-585,T:649-669,T:831-851	https://www.sciencedirect.com/science/article/pii/S0166223602000103	576	631	646	818
Q14643	Inositol 1,4,5-trisphosphate receptor type 1	ITPR1 (INSP3R1)	Tchem	2758	IP3 receptor	LGIC		IP3 receptor		pore-forming	calcium	ligand-gated	PMID: 14685260	Intracellular channel that mediates calcium release from the endoplasmic reticulum following stimulation by inositol 1,4,5-trisphosphate	No	MIR, INS	PPXXF		TRPC4, HOM1, HOM2, HOM3, RYR1, RYR2, ITPR1, SHANK1, SHANK3, ACTA2, CNN1, PLN, PRKG1, ITPR1, CABP1, TESPA1, AHCYL1, BCL2L10, AHCYL2, BOK		none	2283	2598	315	Yes			6	6		6	6	2283	2598	T:2283-2303,T:2315-2335,T:2362-2382,T:2406-2426,T:2449-2469,T:2578-2598		2497	2517
Q14571	Inositol 1,4,5-trisphosphate receptor type 2	ITPR2	Tbio	2701	IP3 receptor	LGIC		IP3 receptor		pore-forming	calcium(*)	ligand-gated(IP3)(*)	PMID: 12621039	Receptor for inositol 1,4,5-trisphosphate, a second messenger that mediates the release of intracellular calcium.	No	MIR, INS	no		CABP1, BOK, BCL2L10, TRPC4		none	2228	2542	314	Yes			6	6		6	6	2228	2542	T:2228-2248,T:2261-2281,T:2308-2328,T:2352-2372,T:2395-2415,T:2522-2542		2522	2542
Q14573	Inositol 1,4,5-trisphosphate receptor type 3	ITPR3	Tchem	2671	IP3 receptor	LGIC		IP3 receptor		pore-forming	calcium	ligand-gated(IP3)	PMID: 8288584	Receptor for inositol 1,4,5-trisphosphate, a second messenger that mediates the release of intracellular calcium.	No	MIR, INS	no		TRPC1, TRPC3, TRPC4, TRPV4, SIGMAR1, PML, AKT1, IRAG2, CABP1, TMBIM4/LFG4, CEMIP, TESPA1, TMEM203, BOK, BCL2L10	6DQZ		2203	2517	314	Yes			7	7	5|6	6	6	2203	2517	T:2203-2223,T:2236-2256,T:2265-2285,T:2326-2346,T:2369-2389,T:2497-2517	https://www.ncbi.nlm.nih.gov/pmc/articles/PMC6442203/	2369	2389	2497	2517
P51575	P2X purinoceptor 1	P2RX1 (P2X1)	Tchem	399	P2X receptor	LGIC		P2X receptor		pore-forming	non-selective cation(*)	ligand-gated(ATP)	PMID: 22971236	Ligand-gated ion channel with relatively high calcium permeability.	No	P2X	no				AF-P51575-F1	29	358	329	Yes			2	2	2	2	2	29	358	T:29-50,T:339-358	https://www.ncbi.nlm.nih.gov/pmc/articles/PMC2629452/	339	358
Q9UBL9	P2X purinoceptor 2	P2RX2 (P2X2)	Tchem	471	P2X receptor	LGIC		P2X receptor		pore-forming	non-selective cation	ligand-gated(ATP)	PMID: 15313628, PMID: 16885977	Ion channel gated by extracellular ATP involved in a variety of cellular responses, such as excitatory postsynaptic responses in sensory neurons, neuromuscular junctions (NMJ) formation, hearing, perception of taste and peristalsis.	No	P2X	no				AF-Q9UBL9-F1	43	358	315	Yes			1	1	2	2	2	43	358	T:43-63,T:338-358	https://www.ncbi.nlm.nih.gov/pmc/articles/PMC2629452/	338	358
P56373	P2X purinoceptor 3	P2RX3	Tclin	397	P2X receptor	LGIC		P2X receptor		pore-forming	non-selective cation(*)	ligand-gated(ATP)	PMID: 27626375	Receptor for ATP that acts as a ligand-gated cation channel	No	P2X	no			5SVP		21	341	320	Yes	102	297	2	2	2	2	2	21	341	T:21-43,T:323-341	https://www.sciencedirect.com/science/article/pii/S0022283614002848	323	341
Q99571	P2X purinoceptor 4	P2RX4	Tchem	388	P2X receptor	LGIC		P2X receptor		pore-forming	non-selective cation(*)	ligand-gated(ATP)	PMID: 15313628, , PMID: 22537142	Receptor for extracellularly released ATP acting as a ligand-gated ion channel that plays multiple role in immunity and central nervous system physiology	No	P2X	no		AP1M2		AF-Q99571-F1	34	359	325	Yes			2	2	2	2	2	34	359	T:34-54,T:339-359	https://www.ncbi.nlm.nih.gov/pmc/articles/PMC2629452/	339	359
Q93086	P2X purinoceptor 5	P2RX5 (P2X5)	Tchem	422	P2X receptor	LGIC		P2X receptor		pore-forming	non-selective cation	ligand-gated(ATP)	PMID: 15313628, PMID: 22537142	Receptor for ATP that acts as a ligand-gated ion channel.	No	P2X	no				AF-Q93086-F1	31	340	309	Yes			1	1	2	2	2	31	340	T:31-51,T:320-340	https://www.ncbi.nlm.nih.gov/pmc/articles/PMC2629452/	320	340
O15547	P2X purinoceptor 6	P2RX6 (P2RXL1, P2X6)	Tchem	441	P2X receptor	LGIC		P2X receptor		pore-forming	non-selective cation(*)	ligand-gated(ATP)(*)	PMID: 15657042, PMID: 10440098	Receptor for ATP that acts as a ligand-gated ion channel	No	P2X	no				AF-O15547-F1	40	354	314	Yes			1	1	2	2	2	40	354	T:40-60,T:334-354	https://www.ncbi.nlm.nih.gov/pmc/articles/PMC2629452/	334	354
Q99572	P2X purinoceptor 7	P2RX7	Tchem	595	P2X receptor	LGIC		P2X receptor		pore-forming	non-selective cation(*)	ligand-gated(ATP)	PMID: 11707406, PMID: 29026074	Receptor for ATP that acts as a ligand-gated ion channel.	No	P2X	no		LAMA3, ITGB2, ACTB, ACTN4, SVIL, MPP3, HSPA1, HSPCB, HSPA8, PIK230, PTPRB, EMP2		AF-Q99572-F1	26	355	329	Yes			1	1	2	2	2	26	355	T:26-46,T:335-355	https://www.ncbi.nlm.nih.gov/pmc/articles/PMC2629452/	335	355
P35523	Chloride channel protein 1	CLCN1 (CLC1)	Tbio	988	CLC	Chloride channels		CLC		pore-forming	chloride	voltage-gated	PMID: 29809153	Voltage-gated chloride channel / repolarization in skeletal muscle cells after muscle contraction	No	CBS	no			6QVD		119	578	459	Yes	283	553	11	11	2|3 6|7	14	10	119	578	T:119-150,T:159-179,I:184-195,T:209-228,T:229-246,I:269-290,T:302-321,T:348-376,T:391-408,I:415-426,T:458-478,T:479-498,I:522-554,T:558-578	https://scholar.google.com/scholar?hl=en&as_sdt=0%2C11&q=X-ray+structure+of+a+ClC+chloride+channel+at+3.0%E2%80%89%C3%85+reveals+the+molecular+basis+of+anion+selectivity&btnG=	159	179	348	376	391	408
P51788	Chloride channel protein 2	CLCN2 (ClC-2)	Tclin	898	CLC	Chloride channels		CLC		pore-forming	chloride(*)	voltage-gated(*)	PMID: 17762171	Voltage-gated chloride channel.	No	CBS	no			7XF5		88	548	460	Yes			12	12	2|3 6|7	17	10	88	548	T:88-121,T:130-155,I:164-171,T:180-198,T:205-223,I:239-251,I:255-263,T:275-295,T:321-349,T:358-377,T:429-449,T:457-480,I:497-511,I:512-513,I:514-525,I:526-530,T:531-548	https://scholar.google.com/scholar?hl=en&as_sdt=0%2C11&q=X-ray+structure+of+a+ClC+chloride+channel+at+3.0%E2%80%89%C3%85+reveals+the+molecular+basis+of+anion+selectivity&btnG=	130	155	180	198	321	349	358	377
P51790	H(+)/Cl(-) exchange transporter 3	CLCN3 (ClC-3)	Tbio	818	CLC	Chloride channels		CLC		pore-forming	chloride	voltage-gated(outward rectifier)	PMID: 12471024, PMID: 7605637	The presence of conserved gating glutamate residues is typical for family members that function as antiporters”	No	CBS	no				AF-P51790-F1	126	624	498	Yes			11	11	2|3 6|7	16	10	126	624	T:126-163,T:209-232,I:241-248,T:258-276,T:282-301,I:313-325,I:329-337,T:349-367,T:391-416,T:423-443,T:500-520,T:525-544,I:572-586,I:590-601,I:602-605,T:606-624	https://scholar.google.com/scholar?hl=en&as_sdt=0%2C11&q=X-ray+structure+of+a+ClC+chloride+channel+at+3.0%E2%80%89%C3%85+reveals+the+molecular+basis+of+anion+selectivity&btnG=	209	232	258	276	391	416	423	443
P51793	H(+)/Cl(-) exchange transporter 4	CLCN4	Tbio	760	CLC	Chloride channels		CLC		pore-forming	chloride	voltage-gated(outward rectifier)	PMID: 29845874	antiporter	No	CBS	no				AF-P51793-F1	68	566	498	Yes			11	11	2|3 6|7	16	10	68	566	T:68-105,T:151-174,I:183-190,T:200-218,T:224-243,I:255-267,I:271-279,T:291-309,T:333-358,T:365-385,T:442-462,T:467-486,I:514-528,I:532-543,I:544-547,T:548-566	https://scholar.google.com/scholar?hl=en&as_sdt=0%2C11&q=X-ray+structure+of+a+ClC+chloride+channel+at+3.0%E2%80%89%C3%85+reveals+the+molecular+basis+of+anion+selectivity&btnG=	151	174	200	218	333	358	365	385
P51795	H(+)/Cl(-) exchange transporter 5	CLCN5 (CLCK2) (ClC-5)	Tbio	816	CLC	Chloride channels		CLC		pore-forming	chloride	voltage-gated(outward rectifier)(*)	PMID: 20466723	Proton-coupled chloride transporter. Functions as antiport system and exchanges chloride ions against protons .The absence of conserved gating glutamate residues is typical for family members that function as channels (Probable)	No	CBS	no		NEDD4, NEDD4L	2JA3		125	631	506	Yes	600	631	9	9	2|3 6|7	17	10	125	622	T:125-162,T:208-231,I:240-247,T:256-275,T:281-300,I:312-324,I:328-336,T:348-366,T:389-415,T:422-442,T:498-518,T:523-542,I:570-584,I:585-587,I:588-599,I:600-604,T:605-622	https://scholar.google.com/scholar?hl=en&as_sdt=0%2C11&q=X-ray+structure+of+a+ClC+chloride+channel+at+3.0%E2%80%89%C3%85+reveals+the+molecular+basis+of+anion+selectivity&btnG=	208	231	256	275	389	415	422	442
P51797	H(+)/Cl(-) exchange transporter 6	CLCN6 (KIAA0046)	Tbio	869	CLC	Chloride channels		CLC		pore-forming	chloride	voltage-gated(*)	PMID: 29845874	Voltage-gated channel mediating the exchange of chloride ions against protons antiporter	No	CBS	no				AF-P51797-F1	81	571	490	Yes			7	7	2|3 6|7	17	10	81	571	T:81-113,T:128-150,I:159-166,T:176-194,T:200-217,I:241-253,I:257-265,T:277-294,T:335-364,T:371-392,T:462-481,T:487-511,I:519-533,I:534-536,I:537-548,I:549-552,T:553-571	https://scholar.google.com/scholar?hl=en&as_sdt=0%2C11&q=X-ray+structure+of+a+ClC+chloride+channel+at+3.0%E2%80%89%C3%85+reveals+the+molecular+basis+of+anion+selectivity&btnG=	128	150	176	194	335	364	371	392
P51798	H(+)/Cl(-) exchange transporter 7	CLCN7	Tbio	805	CLC	Chloride channels		CLC		pore-forming	chloride	voltage-gated	PMID : 18449189	antiporter	No	CBS	no			7BXU		93	609	516	Yes	93	609	11	11	2|3 6|7	17	10	127	597	T:127-159,T:174-197,I:206-213,T:223-241,T:247-264,I:288-300,I:304-312,T:322-341,T:375-405,T:410-432,T:487-507,T:512-535,I:545-559,I:560-562,I:563-574,I:575-578,T:579-597	https://scholar.google.com/scholar?hl=en&as_sdt=0%2C11&q=X-ray+structure+of+a+ClC+chloride+channel+at+3.0%E2%80%89%C3%85+reveals+the+molecular+basis+of+anion+selectivity&btnG=	174	197	223	241	375	405	410	432
P51800	Chloride channel protein ClC-Ka	CLCNKA	Tchem	687	CLC	Chloride channels		CLC		pore-forming	chloride(*)	voltage-gated(*)	PMID: 8112288	Voltage-gated chloride channel.	No	CBS	no			2PFI		52	506	610	Yes	591	662	10	10	2|3 6|7	10	10	52	506	T:52-72,T:161-181,T:202-222,T:236-256,T:282-302,T:329-349,T:396-416,T:417-437,T:452-472,T:486-506	https://scholar.google.com/scholar?hl=en&as_sdt=0%2C11&q=X-ray+structure+of+a+ClC+chloride+channel+at+3.0%E2%80%89%C3%85+reveals+the+molecular+basis+of+anion+selectivity&btnG=	161	181	202	222	329	349	396	416
P51801	Chloride channel protein ClC-Kb	CLCNKB	Tchem	687	CLC	Chloride channels		CLC		pore-forming	chloride	voltage-gated(*)	PMID: 11734858	Voltage-gated chloride channel.	No	CBS	no				AF-P51801-F1	51	520	469	Yes			10	10	2|3 6|7	14	10	51	520	T:51-82,T:91-111,I:116-127,T:141-160,T:161-180,I:203-224,T:236-255,T:282-310,T:325-342,I:349-360,T:400-420,T:421-440,I:464-496,T:500-520	https://scholar.google.com/scholar?hl=en&as_sdt=0%2C11&q=X-ray+structure+of+a+ClC+chloride+channel+at+3.0%E2%80%89%C3%85+reveals+the+molecular+basis+of+anion+selectivity&btnG=	91	111	141	160	282	310	325	342
Q8WZ55	Barttin	BSND (BART)	Tbio	320	CLC	Chloride channels		CLC		auxiliary			PMID: 11734858	Functions as a beta-subunit for CLCNKA and CLCNKB chloride channels	Yes		no								Yes			2	2		2	2	6	53	T:6-26,T:33-53
Q86WC4	Osteopetrosis-associated transmembrane protein 1	OSTM1 (GL)	Tbio	334	CLC	Chloride channels		CLC		auxiliary			PMID: 21527911	Alt name: Chloride channel 7 beta subunit	Yes		no			7CQ7					Yes			2	2		1	1	285	305	T:285-305	https://www.ncbi.nlm.nih.gov/pmc/articles/PMC7460669/
P13569	Cystic fibrosis transmembrane conductance regulator	CFTR (ABCC7)	Tclin	1480	CFTR	Chloride channels		CFTR		pore-forming	chloride	ligand-gated(ATP), phosphorylation	PMID: 15284228, PMID: 23284076	Epithelial ion channel, Can inhibit the chloride channel activity of ANO1, Modulates the activity of the epithelial sodium channel (ENaC) complex	No	ABC	PDZ		SLC26A3, SLC26A6, SHANK2, NHERF1, MYO6, GOPC, ANO1, SLC26A8, AHCYL1, CSE1L, GORASP2, MARCHF2	8EJ1		78	1155	1077	Yes	92	1155	11	11	6|12	12	12	78	1151	T:78-98,T:123-146,T:196-216,T:223-243,T:299-319,T:340-358,T:859-879,T:919-939,T:991-1011,T:1014-1034,T:1096-1116,T:1131-1151	https://rupress.org/jgp/article/138/5/495/42954/Structural-basis-for-the-channel-function-of-a	340	358	1131	1151
Q5XXA6	Anoctamin-1	ANO1 (DOG1, ORAOV2, TAOS2, TMEM16A)	Tclin	986	CaCC	Chloride channels		CaCC	ANO	pore-forming	chloride	voltage-gated(calcium)	PMID: 21056985	Has 10-transmembrane topology	No	Anoct_dimer	no		TRPV4, CFTR, ANO9		AF-Q5XXA6-F1	658	986	652	Yes	3	986	7	7	5|6	10	10	334	913	T:334-354,T:407-427,T:520-540,T:569-589,T:608-628,T:658-678,T:726-746,T:747-767,T:785-805,T:893-913	https://www.mdpi.com/1422-0067/22/6/3259	658	678	726	746	747	767	785	805	893	913
Q9NQ90	Anoctamin-2	ANO2 (C12orf3, TMEM16B)	Tchem	1003	CaCC	Chloride channels		CaCC	ANO	pore-forming	chloride	voltage-gated(calcium)(*)	PMID: 19474308	Calcium-activated chloride channel (CaCC) which may play a role in olfactory signal transduction.	No	Anoct_dimer	no		DLG4		AF-Q9NQ90-F1	603	769	403	Yes			8	8	3|4|5|6|7	8	8	366	928	T:366-386,T:435-455,T:539-559,T:583-603,T:624-644,T:749-769,T:802-822,T:908-928	https://onlinelibrary.wiley.com/doi/full/10.1002/jcp.27865	603	644	749	769
Q9BYT9	Anoctamin-3	ANO3 (C11orf25, TMEM16C)	Tbio	981	CaCC	Chloride channels		CaCC	ANO	auxiliary			PMID: 21642943, 38657371	Does not exhibit calcium-activated chloride channel (CaCC) activity	Yes	Anoct_dimer	no		KCNT1/Slack						Yes			8	8		8	8	404	935	T:404-424,T:470-490,T:551-571,T:593-613,T:641-661,T:762-782,T:811-831,T:915-935		641	661	762	782
Q32M45	Anoctamin-4	ANO4 (TMEM16D)	Tbio	955	CaCC	Chloride channels		CaCC	ANO	pore-forming	non-selective monovalent cation	voltage-gated(calcium)(*)	PMID: 30783137, 38657371	CONFLICTING PAPERS: Does not exhibit calcium-activated chloride channel (CaCC) activity	No	Anoct_dimer	no					596	736	383	Yes			7	7	5|6	8	8	353	906	T:353-373,T:425-445,T:506-526,T:548-568,T:596-616,T:716-736,T:769-789,T:886-906	https://rupress.org/jgp/article/141/5/585/43210/TMEM16F-Anoctamin-6-an-anion-channel-of-delayed	596	616	716	736
Q75V66	Anoctamin-5	ANO5 (GDD1, TMEM16E)	Tbio	913	CaCC	Chloride channels		CaCC	ANO	pore-forming	chloride(*)	voltage-gated(calcium)(*)	PMID: 36157935, 38657371	CONFLICTING PAPERS: Does not exhibit calcium-activated chloride channel (CaCC) activity	No	Anoct_dimer	no				AF-Q75V66-F1	558	700	400	Yes			8	8	3|4|5|6|7	8	8	300	855	T:300-320,T:381-401,T:463-483,T:512-532,T:558-578,T:680-700,T:733-753,T:835-855	https://onlinelibrary.wiley.com/doi/full/10.1002/jcp.27865	558	578	680	700
Q4KMQ2	Anoctamin-6	ANO6 (TMEM16F)	Tbio	910	CaCC	Chloride channels		CaCC	ANO	pore-forming	chloride	voltage-gated(calcium)	PMID: 33658434	Has 10-transmembrane, Small-conductance calcium-activated nonselective cation (SCAN) channel	No	Anoct_dimer	no					602	857	556	Yes	1	717	8	8	5|6	10	10	301	857	T:301-321,T:376-396,T:456-476,T:510-530,T:552-572,T:602-621,T:664-684,T:685-705,T:723-743,T:837-857	https://rupress.org/jgp/article/141/5/585/43210/TMEM16F-Anoctamin-6-an-anion-channel-of-delayed	602	621	664	684	685	705	723	743	837	857
Q6IWH7	Anoctamin-7	ANO7 (NGEP, PCANAP5, TMEM16G)	Tbio	933	CaCC	Chloride channels		CaCC	ANO	auxiliary			PMID: 22075693, 38657371	Does not exhibit calcium-activated chloride channel (CaCC) activity	Yes	Anoct_dimer	no								Yes			7	7		8	8	356	864	T:356-376,T:421-441,T:500-520,T:551-571,T:589-609,T:715-735,T:764-784,T:844-864	https://www.sciencedirect.com/science/article/pii/S0022283614005476?via%3Dihub	589	609	715	735
Q9HCE9	Anoctamin-8	ANO8 (KIAA1623, TMEM16H)	Tbio	1232	CaCC	Chloride channels		CaCC	ANO	pore-forming	chloride(*)	voltage-gated(calcium)(*)	PMID: 31061173, 38657371	CONFLICTING PAPERS: Does not exhibit calcium-activated chloride channel (CaCC) activity	No	Anoct_dimer	no				AF-Q9HCE9-F1	438	771	617	Yes	42	1227	4	4	5|6	8	8	245	862	T:245-265,T:282-302,T:357-377,T:401-421,T:438-458,T:751-771,T:808-828,T:842-862	https://scholar.google.com/scholar?q=Putative%20pore-loops%20of%20TMEM16anoctamin%20channels%20affect%20channel%20density%20in%20cell%20membranes	438	458	751	771
A1A5B4	Anoctamin-9	ANO9 (PIG5, TMEM16J, TP53I5)	Tbio	782	CaCC	Chloride channels		CaCC	ANO	pore-forming	cation	voltage-gated(calcium)	PMID: 29604966, 38657371	CONFLICTING PAPERS:Does not exhibit calcium-activated chloride channel (CaCC) activity and can inhibit the activity of ANO1	No	Anoct_dimer	no		ANO1			424	573	650	Yes	74	598	7	7	5|6	8	8	199	724	T:199-219,T:265-285,T:332-352,T:374-394,T:424-444,T:553-573,T:605-625,T:704-724	https://rupress.org/jgp/article/141/5/585/43210/TMEM16F-Anoctamin-6-an-anion-channel-of-delayed	424	444	553	573
Q9NW15	Anoctamin-10	ANO10 (TMEM16K)	Tbio	660	CaCC	Chloride channels		CaCC	ANO	pore-forming	chloride	voltage-gated(calcium)(*)	PMID: 35648332, 38657371	CONFLICTING PAPERS: Does not exhibit calcium-activated chloride channel (CaCC) activity and can inhibit the activity of ANO1	No	Anoct_dimer	no			6R7Z		401	576	403	Yes	420	576	8	8	5|6	8	8	208	611	T:208-228,T:241-261,T:317-337,T:353-373,T:401-421,T:501-521,T:554-574,T:591-611	https://scholar.google.com/scholar_lookup?hl=en&volume=455&publication_year=2008&pages=1210-1215&journal=Nature&author=YD+Yang&author=H+Cho&author=JY+Koo&author=MH+Tak&author=Y+Cho&author=WS+Shim&author=SP+Park&author=J+Lee&author=B+Lee&author=BM+Kim&author=R+Raouf&author=YK+Shin&author=U+Oh&title=TMEM16A+confers+receptor%E2%80%90activated+calcium%E2%80%90dependent+chloride+conductance	401	421	501	521
A8K7I4	Calcium-activated chloride channel regulator 1	CLCA1 (CACC1)	Tbio	914	CaCC	Chloride channels		CaCC	CLCA	auxiliary			PMID: 23112050	May be involved in mediating calcium-activated chloride conductance	Yes	CLCA	metalloprotease,vWF		KCNMB1, CFTR	6PYX					No			0	0							https://www.jbc.org/article/S0021-9258(20)42715-2/fulltext
Q9UQC9	Calcium-activated chloride channel regulator 2	CLCA2 (CACC3)	Tbio	943	CaCC	Chloride channels		CaCC	CLCA	auxiliary			PMID: 29758025	Plays a role in modulating chloride current across the plasma membrane in a calcium-dependent manner,	Yes	CLCA	metalloprotease, vWF		ANO1						Yes			1	1		1	1	902	922	T:902-922
Q9Y6N3	Calcium-activated chloride channel regulator family member 3	CLCA3 (CLCA3P)	Tdark	262	CaCC	Chloride channels		CaCC	CLCA	auxiliary			by similarity	Has Calcium/choloride channel activity	Yes	CLCA	metalloprotease								No			0	0
Q14CN2	Calcium-activated chloride channel regulator 4	CLCA4 (CaCC2)	Tbio	919	CaCC	Chloride channels		CaCC	CLCA	auxiliary			by similarity	May be involved in mediating calcium-activated chloride conductance	Yes	CLCA	metalloprotease, vWF								Yes			1	1		1	1	895	915	T:895-915
O76090	Bestrophin-1	BEST1 (VMD2)	Tbio	585	CaCC	Chloride channels		CaCC	BEST	pore-forming	chloride	voltage-gated(calcium)	PubMed:26200502, PMID: 35789156	Forms calcium-sensitive chloride channels. Highly permeable to bicarbonate	No	Bestrophin	no		PPP2CB, PPP2R1B	8D1M		26	291	265	Yes			4	4		5	4	26	291	T:26-46,T:71-91,T:179-199,I:229-249,T:271-291
Q8NFU1	Bestrophin-2	BEST2 (VMD2L1)	Tbio	509	CaCC	Chloride channels		CaCC	BEST	pore-forming	chloride	voltage-gated(calcium)	PMID: 12907679, PMID: 35789156	Forms calcium-sensitive chloride channels. Permeable to bicarbonate.	No	Bestrophin	no			8D1G		26	291	265	Yes			5	5		5	4	26	291	T:26-46,T:71-91,T:179-199,I:229-249,T:271-291
Q8N1M1	Bestrophin-3	BEST3 (VMD2L3)	Tbio	668	CaCC	Chloride channels		CaCC	BEST	pore-forming	chloride(*)	voltage-gated(calcium)(*)	PMID: 12907679, PMID: 35789156	Forms calcium-sensitive chloride channels. Permeable to bicarbonate	No	Bestrophin	no				AF-Q8N1M1-F1	26	291	265	Yes			4	4		5	4	26	291	T:26-46,T:71-91,T:179-199,I:229-249,T:271-291	https://scholar.google.com/scholar?hl=en&as_sdt=0%2C11&q=A+PI3+Kinase+Inhibitor+Found+to+Activate+Bestrophin+3+qu&btnG=
Q8NFU0	Bestrophin-4	BEST4 (VMD2L2)	Tbio	473	CaCC	Chloride channels		CaCC	BEST	pore-forming	chloride	ligand-gated(*)	PMID: 12907679, PMID: 30628889	Forms calcium-sensitive chloride channels. Permeable to bicarbonate	No	Bestrophin	no				AF-Q8NFU0-F1	26	306	280	Yes			2	2	2	5	4	26	306	T:26-46,T:71-91,T:179-199,I:229-249,T:286-306	https://www.ncbi.nlm.nih.gov/pmc/articles/PMC4341822/	tried
P21796	Voltage-dependent anion-selective channel protein 1	VDAC1 (VDAC)	Tbio	283	VDAC	Chloride channels		VDAC		pore-forming	chloride	voltage-gated	PMID: 23663973	Forms a channel through the mitochondrial outer membrane and also the plasma membrane	No	porin	no		BCL2L1, BAK1, RTL10/BOP, SPG7, NIPSNAP2, SLC25A30, TMEM41B, BCAP31	2JK4		8	282	274	Yes	8	188	0	0		19	19	26	282	T:26-35,T:39-47,T:54-64,T:69-76,T:80-89,T:95-104,T:111-120,T:123-130,T:137-145,T:150-158,T:163-175,T:178-185,T:189-198,T:202-211,T:218-227,T:231-238,T:242-251,T:254-263,T:273-282	https://www.pnas.org/doi/epdf/10.1073/pnas.0808115105
P45880	Voltage-dependent anion-selective channel protein 2	VDAC2	Tchem	294	VDAC	Chloride channels		VDAC		pore-forming	chloride(*)	voltage-gated(*)	PMID: 21425834	Forms a channel through the mitochondrial outer membrane that allows diffusion of small hydrophilic molecules	No	porin	no		VDAC1, ARMC12, KLC3, SPATA33, PPP3CC		AF-P45880-F1	37	293	256	Yes			0	0		19	19	37	293	T:37-46,T:50-58,T:65-75,T:80-87,T:91-100,T:106-115,T:122-131,T:134-141,T:148-156,T:161-169,T:174-186,T:189-196,T:200-209,T:213-222,T:229-238,T:242-249,T:253-262,T:265-274,T:284-293	https://www.pnas.org/doi/epdf/10.1073/pnas.0808115105
Q9Y277	Voltage-dependent anion-selective channel protein 3	VDAC3	Tbio	283	VDAC	Chloride channels		VDAC		pore-forming	chloride(*)	voltage-gated	PMID: 35082690	Forms a channel through the mitochondrial outer membrane that allows diffusion of small hydrophilic molecules	No	porin	no		VDAC1, ARMC12, MISFA		AF-Q9Y277-F1	26	282	256	Yes			0	0		19	19	26	282	T:26-35,T:39-47,T:54-64,T:69-76,T:80-89,T:95-104,T:111-120,T:123-130,T:137-145,T:150-158,T:163-175,T:178-185,T:189-198,T:202-211,T:218-227,T:231-238,T:242-251,T:254-263,T:273-282	https://karger.com/cpb/article/34/3/842/73096/Recombinant-Human-Voltage-Dependent-Anion
Q8IWT6	Volume-regulated anion channel subunit LRRC8A	LRRC8A (KIAA1437, LRRC8, SWELL1)	Tbio	810	VRAC	Chloride channels		VRAC		pore-forming	chloride	volume-gated	PubMed:24782309, PubMed:24790029, PubMed:26824658, PubMed:30095067	Essential component	No		LRR			6DJB		24	341	317	Yes	33	145	4	4	1|2	4	4	24	341	T:24-47,T:124-142,T:265-286,T:317-341	https://rupress.org/jgp/article/151/2/100/120422/A-30-year-journey-from-volume-regulated-anion	24	47	124	142
Q6P9F7	Volume-regulated anion channel subunit LRRC8B	LRRC8B (KIAA0231)	Tbio	803	VRAC	Chloride channels		VRAC		pore-forming	chloride(*)	volume-gated(*)	doi: https://doi.org/10.1101/2022.07.31.502239	Non-essential component of VRAC	No		LRR				AF-Q6P9F7-F1	26	328	302	Yes			4	4	1|2	4	4	26	328	T:26-46,T:120-140,T:262-282,T:308-328	https://rupress.org/jgp/article/151/2/100/120422/A-30-year-journey-from-volume-regulated-anion	26	46	120	140
Q8TDW0	Volume-regulated anion channel subunit LRRC8C	LRRC8C (AD158, FAD158)	Tbio	803	VRAC	Chloride channels		VRAC		pore-forming	chloride(*)	volume-gated	PubMed:28193731	Non-essential component of VRAC	No		LRR			8DXR		15	341	326	Yes	15	329	4	4	1|2	4	4	23	341	T:23-43,T:126-146,T:267-287,T:321-341	https://rupress.org/jgp/article/151/2/100/120422/A-30-year-journey-from-volume-regulated-anion	23	43	126	146
Q7L1W4	Volume-regulated anion channel subunit LRRC8D	LRRC8D (LRRC5)	Tbio	858	VRAC	Chloride channels		VRAC		pore-forming	chloride(*)	volume-gated	PubMed:24782309, PubMed:26530471, PubMed:28193731, PubMed:26824658	Non-essential component of VRAC	No		LRR			6MO4		23	386	363	Yes	80	299	3	3	1|2	4	4	23	386	T:23-48,T:164-182,T:309-328,T:361-386	https://rupress.org/jgp/article/151/2/100/120422/A-30-year-journey-from-volume-regulated-anion	23	48	164	182
Q6NSJ5	Volume-regulated anion channel subunit LRRC8E	LRRC8E	Tbio	796	VRAC	Chloride channels		VRAC		pore-forming	chloride	volume-gated	PubMed:24790029, PubMed:26824658, PubMed:28193731	Non-essential component of VRAC	No		LRR				AF-Q6NSJE-F1	23	334	311	Yes			3	3	1|2	4	4	23	334	T:23-43,T:117-137,T:266-286,T:314-334	https://rupress.org/jgp/article/151/2/100/120422/A-30-year-journey-from-volume-regulated-anion	23	43	117	137
O00299	Chloride intracellular channel protein 1	CLIC1 (G6, NCC27)	Tbio	241	CLIC	Chloride channels		CLIC		pore-forming	chloride	voltage-gated, pH sensitive(*)	PMID: 10834939,PMID: 11551966	Can insert into membranes and form chloride ion channels. Channel activity depends on the pH. Membrane insertion seems to be redox-regulated and may occur only under oxydizing conditions	No	CLIC, GST	no		TRAPPC2	3SWL		13	236	223	Yes	13	236	0	0	1	1	1	26	46	T:26-46	https://www.sciencedirect.com/science/article/pii/S0014579310002073	26	46
O15247	Chloride intracellular channel protein 2	CLIC2	Tbio	247	CLIC	Chloride channels		CLIC		pore-forming	chloride	voltage-gated, pH sensitive(*)	PMID: 19356589	Can insert into membranes and form chloride ion channels. Channel activity depends on the pH. Membrane insertion seems to be redox-regulated and may occur only under oxydizing conditions	No	CLIC, GST	no		TRAPPC2, RYR2	2PER		32	177	145	Yes	41	177	0	0	1	1	1	32	52	T:32-52	https://www.sciencedirect.com/science/article/pii/S0014579310002073	32	52
O95833	Chloride intracellular channel protein 3	CLIC3	Tbio	236	CLIC	Chloride channels		CLIC		pore-forming	chloride(*)	voltage-gated(*)	PMID: 20146363	Can insert into membranes and form chloride ion channels	No	CLIC, GST	no		MAPK15	3FY7		24	175	151	Yes	24	175	0	0	1	1	1	24	44	T:24-44	https://www.sciencedirect.com/science/article/pii/S0014579310002073	24	44
Q9Y696	Chloride intracellular channel protein 4	CLIC4	Tbio	253	CLIC	Chloride channels		CLIC		pore-forming	non-selective	voltage-gated, pH sensitive(*)	PMID: 17453412	Can insert into membranes and form poorly selective ion channels that may also transport chloride ions. only under oxydizing conditions	No	CLIC, GST	no		actin, ezrin, alpha-actinin, gelsolin, IQGAP1, CLIC5A, HRH3, AKAP9, tubulin	2D2Z		12	244	232	Yes	12	244	0	0	1	1	1	37	57	T:37-57	https://www.sciencedirect.com/science/article/pii/S0014579310002073	37	57
Q9NZA1	Chloride intracellular channel protein 5	CLIC5	Tbio	410	CLIC	Chloride channels		CLIC		pore-forming	chloride, sodium, potassium	voltage-gated(*)	PMID: 18028448	Can insert into membranes and form poorly selective ion channels that may also transport chloride ions. / Required for normal hearing	No	CLIC, GST	no		actin, ezrin, alpha-actinin, gelsolin, IQGAP1, AKAP9	6Y2H		31	242	211	Yes	31	242	0	0	1	1	1	193	213	T:193-213	https://www.sciencedirect.com/science/article/pii/S0014579310002073	193	213
Q96NY7	Chloride intracellular channel protein 6	CLIC6 (CLIC1L)	Tbio	704	CLIC	Chloride channels		CLIC		pore-forming	chloride(*)	voltage-gated(*)	DOI:https://doi.org/10.1016/j.bpj.2022.11.785	May insert into membranes and form chloride ion channels. May play a critical role in water-secreting cells, possibly through the regulation of chloride ion transport (By similarity).	No	CLIC, GST	no		DRD2, DRD3, DRD4		AF-Q96NY7-F1	440	704	264	Yes			0	0		1	1	489	509	T:489-509				489	509
Q9H813	Proton-activated chloride channel	PACC1	Tbio	350	PACC	Chloride channels		PACC		pore-forming	anion(*)	voltage-gated(outward rectifier)(*)	PubMed:31023925, PubMed:31318332	Proton-activated chloride channel that mediates import of chloride ion in response to extracellular acidic pH	No		no			7JNC		65	318	253	Yes						2	2	65	318	T:65-85,T:302-318
Q96S66	Chloride channel CLIC-like protein 1	CLCC1 (KIAA0761, MCLC)	Tbio	551	CLCC	Chloride channels		CLCC		pore-forming	chloride	voltage-gated	PubMed:30157172	Seems to act as a chloride ion channel	No	CLIC-like	no		PIGBOS1		AF-Q96S66-F1	185	350	165	Yes			3	3		3	3	185	350	T:185-205,T:217-237,T:330-350
P30301	Lens fiber major intrinsic protein	MIP (AQP0)	Tbio	263	Aquaporin	Other		Aquaporin		pore-forming	water(*)	ligand-gated(calmodulin)(*)	PMID: 26365508, PMID: 23893133	Water channel, Channel activity is down-regulated by CALM when cytoplasmic Ca2+ levels are increased / stabilize cell junctions in the eye lens core	No	MIP	no		BFSP1		AF-P30301-F1	9	219	210	Yes	66	183	6	6	1|2|3|4|5|6	10	6	9	219	T:9-32,T:39-61,I:62-67,I:68-78,T:85-107,T:127-147,T:160-176,I:177-183,I:184-194,T:201-219	https://journals.physiology.org/doi/full/10.1152/ajprenal.2000.278.1.F13	9	32	39	61	85	107	127	147	160	176	201	219
P29972	Aquaporin-1	AQP1 (CHIP28)	Tbio	269	Aquaporin	Other		Aquaporin		pore-forming	water	ligand-gated(cGMP)	PMID: 26365508, PMID: 16962972	(May only function in Rats) Form water-specific channel / plasma membranes of red cells and kidney proximal tubules	No	MIP	no		EPHB2	8CT2		8	228	220	Yes	35	185	6	6	1|2|3|4|5|6	10	6	8	228	T:8-36,T:49-66,I:71-76,I:77-84,T:95-115,T:137-155,T:167-183,I:187-192,I:193-200,T:208-228	https://scholar.google.com/scholar?hl=en&as_sdt=0%2C11&q=verkman+Structure+and+function+of+aquaporin+water+channels&btnG=	8	36	49	66	95	115	137	155	167	183	208	228
P41181	Aquaporin-2	AQP2	Tbio	271	Aquaporin	Other		Aquaporin		pore-forming	water	osmotic permeability	PMID: 33576101	Form water-specific channel/ plasma membranes of renal collecting duct	No	MIP	no			6QF5		12	222	210	Yes	40	166	6	6	1|2|3|4|5|6	8	6	12	222	T:12-32,T:41-59,I:65-74,T:86-107,T:128-148,T:157-176,I:181-193,T:202-222	https://scholar.google.com/scholar?hl=en&as_sdt=0%2C11&q=verkman+Structure+and+function+of+aquaporin+water+channels&btnG=	12	32	41	59	86	107	128	148	157	176	202	222
Q92482	Aquaporin-3	AQP3	Tchem	292	Aquaporin	Other		Aquaporin		pore-forming	water, glycerol, ammonia	proton-gated(*)	PMID: 26365508	Water channel required to promote glycerol permeability and water transport across cell membranes- can transport glycerol	No	MIP	no				AF-Q92482-F1	27	265	238	Yes	63	218	6	6	1|2|3|4|5|6	8	6	27	265	T:27-47,T:54-74,I:79-92,T:99-123,T:158-178,T:189-208,I:209-227,T:245-265	https://scholar.google.com/scholar?hl=en&as_sdt=0%2C11&q=american+physiological+society+Structure+and+function+of+aquaporin+water+channels&btnG=	27	47	54	74	99	123	158	178	189	208	245	265
P55087	Aquaporin-4	AQP4	Tbio	323	Aquaporin	Other		Aquaporin		pore-forming	water	osmotic permeability(*)	PMID: 19842162, PMID: 25150048	Form water-specific channel/ important role in brain water homeostasis and in glymphatic solute transport	No	MIP	no			3GD8		37	252	215	Yes	69	188	6	6	1|2|3|4|5|6	8	6	37	252	T:37-57,T:70-89,I:94-101,T:116-136,T:156-176,T:185-205,I:209-222,T:232-252	https://scholar.google.com/scholar?hl=en&as_sdt=0%2C11&q=verkman+Structure+and+function+of+aquaporin+water+channels&btnG=	37	57	70	89	116	136	156	176	185	205	232	252
P55064	Aquaporin-5	AQP5	Tbio	265	Aquaporin	Other		Aquaporin		pore-forming	water, non-selective anion	osmotic permeability(*)	PMID: 23565173	Form water-specific channel/ important role in fluid secretion in salivary glands/ redundant role in water transport in the eye, lung and in sweat glands	No	MIP	no		TRPV4	5C5X		13	224	211	Yes	43	160	6	6	1|2|3|4|5|6	8	6	13	224	T:13-33,T:40-60,I:66-74,T:88-108,T:127-147,T:159-179,I:181-191,T:204-224	https://scholar.google.com/scholar?hl=en&as_sdt=0%2C11&q=verkman+Structure+and+function+of+aquaporin+water+channels&btnG=	13	33	40	60	88	108	127	147	159	179	204	224
Q13520	Aquaporin-6	AQP6 (AQP2L)	Tbio	282	Aquaporin	Other		Aquaporin		pore-forming	water, anion	pH sensitive(*)	PMID: 25225485	Forms a water-specific channel that participates in distinct physiological functions such as glomerular filtration, tubular endocytosis and acid-base metabolism	No	MIP	no				AF-Q13520-F1	31	264	233	Yes	74	264	5	5	1|2|3|4|5|6|	6	6	31	236	T:31-48,T:55-73,T:100-121,T:142-162,T:169-188,T:215-236	https://journals.physiology.org/doi/full/10.1152/ajprenal.2000.278.1.F14	31	48	55	73	100	121	142	162	169	188	215	236
O14520	Aquaporin-7	AQP7 (AQP7L, AQP9)	Tbio	342	Aquaporin	Other		Aquaporin		pore-forming	water, glycerol, ammonia, urea	pH sensitive	PMID: 30423801	Forms a channel that mediates water and glycerol transport across cell membranes at neutral pH/ channel is also permeable to urea	No	MIP	no		PLIN1	8AMW		36	235	199	Yes	66	208	6	6	1|2|3|4|5|6	7	5	36	235	T:36-56,T:67-86,I:91-98,T:113-148,T:168-188,T:198-219,I:222-235	https://www.sciencedirect.com/science/article/pii/S0969212619303958	36	56	67	86	113	148	168	188	198	219
O94778	Aquaporin-8	AQP8	Tbio	261	Aquaporin	Other		Aquaporin		pore-forming	water, ammonia	persulfidation	PMID: 29732408	Forms a water-specific channel; mercury-sensitive.	No	MIP	no				AF-O94778-F1	28	249	221	Yes	28	209	6	6	1|2|3|4|5|6	6	6	37	249	T:37-57,T:85-105,T:108-128,T:157-177,T:184-204,T:229-249	https://scholar.google.com/scholar?hl=en&as_sdt=0%2C11&q=AS+Verkman+Structure+and+function+of+aquaporin+water+channels&btnG=	37	57	85	105	108	128	157	177	184	204	229	249
O43315	Aquaporin-9	AQP9 (SSC1)	Tbio	295	Aquaporin	Other		Aquaporin		pore-forming	water, glycerol, ammonia, urea, monocarboxylates	osmotic permeability(*)		Forms a water channel with a broad specificity. Also permeable glycerol and urea. Mediates passage of a wide variety of small, non-charged solutes including carbamides, polyols, purines, and pyrimidines.	No	MIP	no		MIP		AF-O43315-F1	28	266	238	Yes	48	216	6	6	1|2|3|4|5|6	8	6	28	266	T:28-48,T:55-75,I:80-93,T:100-124,T:159-179,T:190-209,I:210-228,T:246-266	https://scholar.google.com/scholar?hl=en&as_sdt=0%2C11&q=american+physiological+society+Structure+and+function+of+aquaporin+water+channels&btnG=	28	48	55	75	100	124	159	179	190	209	246	266
Q96PS8	Aquaporin-10	AQP10	Tbio	301	Aquaporin	Other		Aquaporin		pore-forming	water, glycerol	pH sensitive	PMID: 30420639	Water channel that mediates water transport across cell membranes irrespective of the cytosolic pH The channel is permeable to glycerol, especially when the cytosolic pH is acidified	No	MIP	no			6F7H		26	264	238	Yes	54	189	5	5	1|2|3|4|5|6	8	6	26	264	T:26-46,T:53-73,I:78-91,T:98-122,T:157-177,T:188-207,I:208-226,T:244-264	https://scholar.google.com/scholar?hl=en&as_sdt=0%2C11&q=verkman+Structure+and+function+of+aquaporin+water+channels&btnG=	26	46	53	73	98	122	157	177	188	207	244	264
Q8NBQ7	Aquaporin-11	AQP11 (AQPX1)	Tbio	271	Aquaporin	Other		Aquaporin		pore-forming	water, glycerol(*)	unknown(*)		Channel protein that facilitates the transport of water, glycerol and hydrogen peroxide across membrane of cell or organelles guaranteeing intracellular homeostasis in several organs like liver, kidney and brain	No	MIP	no				AF-Q8NBQ7-F1	15	255	240	Yes	42	227	5	5	1|2|3|4|5|6	6	6	15	255	T:15-35,T:42-62,T:75-95,T:164-184,T:195-215,T:235-255	https://scholar.google.com/scholar?hl=en&as_sdt=0%2C11&q=verkman+Structure+and+function+of+aquaporin+water+channels&btnG=	15	35	42	62	75	95	164	184	195	215	235	255
Q8IXF9	Aquaporin-12A	AQP12A (AQP12, AQPX2)	Tbio	295	Aquaporin	Other		Aquaporin		pore-forming	water, glycerol(*)	unknown		Aquaporins facilitate the transport of water and small neutral solutes across cell membranes.	No		no				AF-Q8IXF9-F1	1	236	235	Yes			6	6	1|2|3|4|5|6	6	6	1	236	T:1-21,T:55-75,T:100-126,T:146-166,T:179-199,T:216-236	https://pubmed.ncbi.nlm.nih.gov/36167651/
A6NM10	Aquaporin-12B	AQP-12B	Tdark	295	Aquaporin	Other		Aquaporin		pore-forming	water, glycerol(*)	unknown		Aquaporins facilitate the transport of water and small neutral solutes across cell membranes.	No		no				AF-A6NM10-F1	1	236	235	Yes			6	6	1|2|3|4|5|6	6	6	1	236	T:1-21,T:55-75,T:100-126,T:146-166,T:179-199,T:216-236	https://pubmed.ncbi.nlm.nih.gov/36167651/
P17302	Gap junction alpha-1 protein	GJA1 (GJAL) (CX43)	Tbio	382	Connexins	Other		Connexins		pore-forming	non-selective cation/anion(*)	voltage-gated(*)	PMID: 20066080	One gap junction consists of a cluster of closely packed pairs of transmembrane channels, the connexons, through which materials of low MW diffuse from one cell to a neighboring cell.	No	connexin	no		RIC1/CIP150, CSNK1D, NOV, TMEM65	7F93		24	228	204	Yes			4	4	1	4	4	24	228	T:24-44,T:77-97,T:156-176,T:208-228	https://www.ncbi.nlm.nih.gov/pmc/articles/PMC6309215/	24	44
Q9Y6H8	Gap junction alpha-3 protein	GJA3 (CX46)	Tbio	435	Connexins	Other		Connexins		pore-forming	non-selective cation/anion(*)	voltage-gated	PMID: 30044662	Structural component of gap junctions	No	connexin	no				AF-Q9Y6H8-F1	2	222	220	Yes			4	4	1|2	5	4	2	222	I:2-15,T:20-40,T:72-92,T:153-173,T:202-222	https://scholar.google.com/scholar?hl=en&as_sdt=0%2C11&q=janette+b+myers+Structure+of+native+lens+connexin+46%2F50+intercellular+channels+by+cryo-EM&btnG=	20	40	72	92
P35212	Gap junction alpha-4 protein	GJA4 (CX37)	Tbio	333	Connexins	Other		Connexins		pore-forming	non-selective cation/anion	voltage-gated, pH sensitive(*)	PMID: 7521227, PMID: 33818243	One gap junction consists of a cluster of closely packed pairs of transmembrane channels, the connexons, through which materials of low MW diffuse from one cell to a neighboring cel	No	connexin	no				AF-P35212-F1	21	230	209	Yes			3	3	1	4	4	21	230	T:21-40,T:77-99,T:149-165,T:208-230	https://www.ncbi.nlm.nih.gov/pmc/articles/PMC6309215/	21	40
P36382	Gap junction alpha-5 protein	GJA5 (CX40)	Tbio	358	Connexins	Other		Connexins		pore-forming	non-selective cation/anion(*)	voltage-gated, pH sensitive(*)	PMID: 20066080, PMID: 33818243	One gap junction consists of a cluster of closely packed pairs of transmembrane channels, the connexons, through which materials of low MW diffuse from one cell to a neighboring cell.	No	connexin	no				AF-P36382-F1	20	226	206	Yes			4	4	1	4	4	20	226	T:20-40,T:77-97,T:165-185,T:206-226	https://www.ncbi.nlm.nih.gov/pmc/articles/PMC6309215/	20	40
P48165	Gap junction alpha-8 protein	GJA8 (CX50)	Tbio	433	Connexins	Other		Connexins		pore-forming	non-selective cation/anion	voltage-gated	PMID: 15596513	Structural component of eye lens gap junctions	No	connexin	no				AF-P48165-F1	2	224	222	Yes			4	4	1|2	5	4	2	224	I:2-12,T:22-42,T:72-92,T:155-175,T:204-224	https://scholar.google.com/scholar?hl=en&as_sdt=0%2C11&q=janette+b+myers+Structure+of+native+lens+connexin+46%2F50+intercellular+channels+by+cryo-EM&btnG=	22	42	72	92
P57773	Gap junction alpha-9 protein	GJA9 (CX36)(GJA10) (Cx58) (Cx59)	Tbio	515	Connexins	Other		Connexins		pore-forming	non-selective cation/anion(*)	voltage-gated, pH sensitive(*)	PMID: 29706896	One gap junction consists of a cluster of closely packed pairs of transmembrane channels, the connexons, through which materials of low MW diffuse from one cell to a neighboring cell.	No	connexin	no				AF-P57773-F1	20	230	210	Yes			2	2	1	4	4	20	230	T:20-40,T:78-98,T:167-187,T:210-230	https://www.ncbi.nlm.nih.gov/pmc/articles/PMC6309215/	20	40
Q969M2	Gap junction alpha-10 protein	GJA10 (CX62)	Tdark	543	Connexins	Other		Connexins		pore-forming	non-selective cation/anion(*)	voltage-gated, pH sensitive(*)	PMID: 27642298	One gap junction consists of a cluster of closely packed pairs of transmembrane channels, the connexons, through which materials of low MW diffuse from one cell to a neighboring cell.	No	connexin	no				AF-Q969M2-F1	17	230	213	Yes			3	3	1	4	4	17	230	T:17-37,T:77-97,T:166-186,T:210-230	https://www.ncbi.nlm.nih.gov/pmc/articles/PMC6309215/	17	37
P08034	Gap junction beta-1 protein	GJB1 (CX32)	Tbio	283	Connexins	Other		Connexins		pore-forming	non-selective cation/anion(*)	voltage-gated(CO2)	PMID: 10585920, PMID: 10362599	One gap junction consists of a cluster of closely packed pairs of transmembrane channels, the connexons, through which materials of low MW diffuse from one cell to a neighboring cell	No	connexin	no		CNST	5KK9		23	214	191	Yes			4	4	1	4	4	23	214	T:23-45,T:76-95,T:131-153,T:192-214	https://www.ncbi.nlm.nih.gov/pmc/articles/PMC6309215/	23	45
P29033	Gap junction beta-2 protein	GJB2 (CX26)	Tbio	226	Connexins	Other		Connexins		pore-forming	non-selective cation/anion(*)	voltage-gated(CO2), pH sensitive, osmotic permeability(*)	PMID: 19340074, PMID: 35276081, PMID: 17077310, PMID: 22285739, PMID: 12767933, PMID: 20230788	Structural component of gap junctions	No	connexin	no		CNST	6UVT		1	210	209	Yes	1	92	4	4	1	5	4	2	210	I:2-13,T:21-40,T:74-94,T:136-156,T:190-210	https://www.ncbi.nlm.nih.gov/pmc/articles/PMC6309215/	21	40
O75712	Gap junction beta-3 protein	GJB3 (CX31)	Tbio	270	Connexins	Other		Connexins		pore-forming	non-selective cation/anion	voltage-gated, pH sensitive(*)	PMID: 16549784	One gap junction consists of a cluster of closely packed pairs of transmembrane channels, the connexons, through which materials of low MW diffuse from one cell to a neighboring cell	No	connexin	no		CNST		AF-O75712-F1	21	210	189	Yes			4	4	1|2	4	4	21	210	T:21-40,T:76-98,T:127-149,T:188-210	https://scholar.google.com/scholar?hl=en&as_sdt=0%2C11&q=janette+b+myers+Structure+of+native+lens+connexin+46%2F50+intercellular+channels+by+cryo-EM&btnG=	21	40	76	98
Q9NTQ9	Gap junction beta-4 protein	GJB4	Tbio	266	Connexins	Other		Connexins		pore-forming	non-selective cation/anion(*)	voltage-gated(*)	PMID: 21188847	Structural component of gap junctions	No	connexin	no				AF-Q9NTQ9-F1	2	205	203	Yes			4	4	1	5	4	2	205	I:2-13,T:21-40,T:74-94,T:131-151,T:185-205	https://www.ncbi.nlm.nih.gov/pmc/articles/PMC6309215/	21	40
O95377	Gap junction beta-5 protein	GJB5 (Cx31.1)	Tbio	273	Connexins	Other		Connexins		pore-forming	non-selective cation/anion(*)	voltage-gated(*)	PMID: 20066080	One gap junction consists of a cluster of closely packed pairs of transmembrane channels, the connexons, through which materials of low MW diffuse from one cell to a neighboring cell	No	connexin	no				AF-O95377-F1	21	210	189	Yes			4	4	1	4	4	21	210	T:21-40,T:76-98,T:127-149,T:188-210	https://www.ncbi.nlm.nih.gov/pmc/articles/PMC6309215/	21	40
O95452	Gap junction beta-6 protein	GJB6 (CX30)	Tbio	261	Connexins	Other		Connexins		pore-forming	non-selective cation/anion(*)	voltage-gated	PMID: 28982982, PMID: 22292956	One gap junction consists of a cluster of closely packed pairs of transmembrane channels, the connexons, through which materials of low MW diffuse from one cell to a neighboring cell.	No	connexin	no		CNST			23	215	192	Yes			4	4	1|2	4	4	23	215	T:23-45,T:76-98,T:132-154,T:193-215	https://scholar.google.com/scholar?hl=en&as_sdt=0%2C11&q=janette+b+myers+Structure+of+native+lens+connexin+46%2F50+intercellular+channels+by+cryo-EM&btnG=	23	45
Q6PEY0	Gap junction beta-7 protein	GJB7 (CX25)	Tbio	223	Connexins	Other		Connexins		pore-forming	water(*)	diffusion(*)	PMID: 12064583	One gap junction consists of a cluster of closely packed pairs of transmembrane channels, the connexons, through which materials of low MW diffuse from one cell to a neighboring cell	No	connexin	no				AF-Q6PEY0-F1	20	198	178	Yes			4	4	1	4	4	20	198	T:20-40,T:76-96,T:122-142,T:178-198	https://www.ncbi.nlm.nih.gov/pmc/articles/PMC6309215/	20	40
P36383	Gap junction gamma-1 protein	GJC1 (GJA7)(CX45)	Tbio	396	Connexins	Other		Connexins		pore-forming	non-selective cation/anion(*)	voltage-gated(*)	PMID: 20066080	One gap junction consists of a cluster of closely packed pairs of transmembrane channels, the connexons, through which materials of low MW diffuse from one cell to a neighboring cell.	No	connexin	no			3SHW		23	248	225	Yes			4	4	1	4	4	23	248	T:23-45,T:76-95,T:176-198,T:229-248	https://www.ncbi.nlm.nih.gov/pmc/articles/PMC6309215/	23	45
Q5T442	Gap junction gamma-2 protein	GJC2 (GJA12) (Cx47) (Cx46.6)	Tbio	439	Connexins	Other		Connexins		pore-forming	non-selective cation/anion	voltage-gated, ligand-gated(*)	PMID: 11160382	One gap junction consists of a cluster of closely packed pairs of transmembrane channels, the connexons, through which materials of low MW diffuse from one cell to a neighboring cell	No	connexin	no		TJP1		AF-Q5T442-F1	26	286	260	Yes			4	4	1	4	4	26	286	T:26-46,T:79-99,T:217-237,T:266-286	https://www.ncbi.nlm.nih.gov/pmc/articles/PMC6309215/	26	46
Q8NFK1	Gap junction gamma-3 protein	GJC3 (GJE1)	Tbio	279	Connexins	Other		Connexins		pore-forming	not shown(*)	not shown	PMID: 21480002	One gap junction consists of a cluster of closely packed pairs of transmembrane channels, the connexons, through which materials of low MW diffuse from one cell to a neighboring cell	No	connexin	no			6L3V		6	215	209	Yes	6	184	3	3	1	4	4	23	215	T:23-43,T:76-96,T:133-153,T:195-215	https://www.ncbi.nlm.nih.gov/pmc/articles/PMC6309215/	23	43
Q9UKL4	Gap junction delta-2 protein	GJD2 (GJA9)	Tbio	321	Connexins	Other		Connexins		pore-forming	cation	voltage-gated(divalent ions), pH sensitive(*)	PMID: 36906653	One gap junction consists of a cluster of closely packed pairs of transmembrane channels, the connexons, through which materials of low MW diffuse from one cell to a neighboring cell	No	connexin	no			8HKP		2	275	273	Yes	2	246	4	4	1	4	4	20	275	T:20-42,T:76-98,T:198-220,T:253-275	https://www.ncbi.nlm.nih.gov/pmc/articles/PMC6309215/	20	42
Q8N144	Gap junction delta-3 protein	GJD3 (GJA11, GJC1)	Tbio	294	Connexins	Other		Connexins		pore-forming	non-selective cation/anion(*)	voltage-gated, pH sensitive(*)	PMID: 12176752	One gap junction consists of a cluster of closely packed pairs of transmembrane channels, the connexons, through which materials of low MW diffuse from one cell to a neighboring cell	No	connexin	no		TJP1		AF-Q8N144-F1	25	209	184	Yes			4	4	1	4	4	25	209	T:25-45,T:77-97,T:137-157,T:189-209	https://www.ncbi.nlm.nih.gov/pmc/articles/PMC6309215/	25	45
Q96KN9	Gap junction delta-4 protein	GJD4 (CX40.1)	Tdark	370	Connexins	Other		Connexins		pore-forming	non-selective cation/anion(*)	voltage-gated(*)	PMID: 20066080	One gap junction consists of a cluster of closely packed pairs of transmembrane channels, the connexons, through which materials of low MW diffuse from one cell to a neighboring cell	No	connexin	no				AF-Q96KN9-F1	20	217	197	Yes			4	4	1	4	4	20	217	T:20-40,T:77-97,T:147-167,T:197-217	https://www.ncbi.nlm.nih.gov/pmc/articles/PMC6309215/	20	40
A6NN92	Putative gap junction epsilon-1 protein	GJE1	Tdark	205	Connexins	Other		Connexins		pore-forming	not shown	not shown(*)	PMID: 18849090	Mediates calcium-independent ATP release, suggesting activity as a hemichannel. Does not form functional gap junctions/ Could be the product of a pseudogene. There is no mRNA or EST support for this sequence, and GJE1 is a pseudogene in most other primate species.	No	connexin	no				AF-A6NN92-F1	24	191	167	Yes			4	4	1	4	4	24	191	T:24-44,T:77-97,T:113-133,T:171-191	https://www.ncbi.nlm.nih.gov/pmc/articles/PMC6309215/	24	44
Q96RD7	Pannexin-1	PANX1 (MRS1)	Tbio	426	Pannexins	Other		Pannexins		pore-forming	non-selective cation/anion(*)	voltage-gated, ligand-gated, mechanosensitive	PMID: 32284561, PMID: 28735901	Structural component of the gap junctions and the hemichannels/ May play a role as a Ca2+-leak channel	No	Pannexin	no		AQP2	6WBK		31	369	338	Yes	31	369	4	4	1	4	4	41	287	T:41-61,T:107-127,T:218-238,T:267-287	https://www.science.org/doi/full/10.1126/scisignal.abn2081	41	61
Q96RD6	Pannexin-2	PANX2	Tbio	677	Pannexins	Other		Pannexins		pore-forming	non-selective cation/anion(*)	voltage-gated(*)	doi: https://doi.org/10.1101/2022.09.09.507385	Structural component of the gap junctions and the hemichannels	No	Pannexin	no			7XLB		48	315	267	Yes	61	300	4	4	1	4	4	48	315	T:48-70,T:124-146,T:227-249,T:293-315	https://www.jbc.org/article/S0021-9258(20)48066-4/fulltext	48	70
Q96QZ0	Pannexin-3	PANX3	Tbio	392	Pannexins	Other		Pannexins		pore-forming	non-selective cation/anion(*)	voltage-gated(*)	doi: https://doi.org/10.1101/2022.09.09.507385	Structural component of the gap junctions and the hemichannels	No	Pannexin	no				AF-Q96QZ0-F1	40	288	248	Yes			2	2	1	4	4	40	288	T:40-60,T:114-134,T:216-236,T:268-288	https://www.jbc.org/article/S0021-9258(20)48066-4/fulltext	40	60
Q96D31	Calcium release-activated calcium channel protein 1	ORAI1 (CRACM1, TMEM142A)	Tchem	301	Orai	Other		Orai		pore-forming	calcium	ligand-gated(glutamate)(*)	PMID: 23180775	Ca2+ release-activated Ca2+ (CRAC) channel subunit which mediates Ca2+ influx following depletion of intracellular Ca2+ stores and channel activation	No	CRAC_channel	no		CRACR2A/EFCAB4B, STIM1, STIM2, SLC35G1, UBQLN1, ADCY8, ATP2C2	4EHQ		71	255	184	Yes	71	141	3	3	2|3	4	4	88	255	T:88-105,T:120-140,T:174-194,T:235-255	https://www.mdpi.com/1422-0067/22/6/3259	120	140	174	194
Q96SN7	Protein orai-2	ORAI2 (C7orf19, CBCIP2, TMEM142B)	Tchem	254	Orai	Other		Orai		pore-forming	calcium(*)	ligand-gated(glutamate)(*)	PMID: 16807233	Ca2+ release-activated Ca2+ (CRAC) channel subunit which mediates Ca2+ influx following depletion of intracellular Ca2+ stores and channel activation	No	CRAC_channel	no		CRACR2A/EFCAB4B		AF-Q96SN7-F1	66	216	150	Yes			4	4	2|3	4	4	66	216	T:66-83,T:94-114,T:148-168,T:196-216	https://www.mdpi.com/1422-0067/22/6/3259	94	114	148	168
Q9BRQ5	Protein orai-3	ORAI3 (TMEM142C)	Tbio	295	Orai	Other		Orai		pore-forming	calcium	ligand-gated(glutamate)(*)	PMID: 20354224	Ca2+ release-activated Ca2+ (CRAC) channel subunit which mediates Ca2+ influx following depletion of intracellular Ca2+ stores and channel activation	No	CRAC_channel	no		CRACR2A/EFCAB4B		AF-Q9BRQ5-F1	4	264	260	Yes	4	123	3	3	2|3	4	4	63	264	T:63-82,T:95-115,T:157-177,T:244-264	https://www.mdpi.com/1422-0067/22/6/3259	95	115	157	177
Q92508	Piezo-type mechanosensitive ion channel component 1	PIEZO1 (FAM38A, KIAA0233)	Tchem	2521	Piezo	Other		Piezo		pore-forming	cation, non-selective(*)	mechanosensitive	PMID: 31494839	Pore-forming subunit of a mechanosensitive non-specific cation channel	No	piezo	no		PKD2, STOML3		AF-Q92508-F1	2177	2452	275	Yes			31	31	37|38	36	36	5	2452	T:5-25,T:27-47,T:64-84,T:118-138,T:194-214,T:218-238,T:248-268,T:302-322,T:428-448,T:460-480,T:514-534,T:579-599,T:602-622,T:629-649,T:681-701,T:823-843,T:852-872,T:926-946,T:987-1007,T:1043-1063,T:1160-1180,T:1184-1204,T:1218-1240,T:1247-1264,T:1277-1297,T:1678-1698,T:1700-1720,T:1734-1754,T:1962-1982,T:2003-2023,T:2032-2052,T:2061-2081,T:2100-2122,T:2129-2149,T:2177-2197,T:2432-2452	https://scholar.google.com/scholar?hl=en&as_sdt=0%2C11&q=peng+jin+Mechanosensitive+Ion+Channels%3A+Structural+Features+Relevant+to+Mechanotransduction+Mechanisms&btnG=	2177	2197	2432	2452
Q9H5I5	Piezo-type mechanosensitive ion channel component 2	PIEZO2 (C18orf30, C18orf58, FAM38B)	Tbio	2752	Piezo	Other		Piezo		pore-forming	cation, non-selective(*)	mechanosensitive	PMID: 35292651	Component of a mechanosensitive channel required for rapidly adapting mechanically activated (MA) currents. Required for Merkel-cell mechanotransduction.	No	piezo	no				none	2406	2682	276	Yes			35	35	37|38	37	37	5	2682	T:5-25,T:27-47,T:62-82,T:119-139,T:214-234,T:237-257,T:266-286,T:336-356,T:505-525,T:541-561,T:581-598,T:678-698,T:704-724,T:732-752,T:782-802,T:932-952,T:958-978,T:985-1005,T:1053-1073,T:1134-1154,T:1170-1190,T:1217-1237,T:1291-1311,T:1315-1335,T:1349-1371,T:1404-1424,T:1900-1920,T:1935-1955,T:1967-1987,T:2191-2211,T:2232-2252,T:2260-2280,T:2290-2310,T:2327-2344,T:2358-2378,T:2406-2426,T:2662-26…	https://scholar.google.com/scholar?hl=en&as_sdt=0%2C11&q=peng+jin+Mechanosensitive+Ion+Channels%3A+Structural+Features+Relevant+to+Mechanotransduction+Mechanisms&btnG=	2406	2426	2662	2682
Q8IU99	Calcium homeostasis modulator protein 1	CALHM1 (FAM26C)	Tbio	346	CALHM	Unclassified		CALHM		pore-forming	calcium, sodium, potassium	voltage-gated	PMID: 22711817	Pore-forming subunit of a voltage-gated ion channel required for sensory perception of sweet, bitter and umami tastes (By similarity).	No	CALHM	no			8GMR		18	202	184	Yes	40	124	3	3	2|3	4	4	18	202	T:18-38,T:51-71,T:109-129,T:182-202	https://scholar.google.com/scholar?hl=en&as_sdt=0%2C11&q=Structure+of+human+CALHM1+reveals+key+locations+for+channel+regulation+and+blockade+by+ruthenium+red&btnG=	51	71	109	129
Q9HA72	Calcium homeostasis modulator protein 2	CALHM2 (FAM26B)	Tbio	323	CALHM	Unclassified		CALHM		pore-forming	calcium(*)	voltage-gated(*)	PMID: 31988524	Pore-forming subunit of a voltage-gated ion channel	No	CALHM	no			6VAI		21	230	209	Yes	66	230	4	4	1	4	4	21	205	T:21-41,T:55-75,T:100-120,T:185-205	https://scholar.google.com/scholar?hl=en&as_sdt=0%2C11&q=Structures+of+CALHM+channels+revealed+j+kevin+foskett&btnG=	21	41
Q86XJ0	Calcium homeostasis modulator protein 3	CALHM3 (FAM26A)	Tdark	344	CALHM	Unclassified		CALHM		pore-forming	calcium(*)	voltage-gated(*)	PMID: 30804437	Pore-forming subunit of a voltage-gated ion channel, also permeable to larger molecules including ATP	No	CALHM	no				AF-Q86XJ0-F1	17	198	181	Yes	37	72	3	3	1	4	4	17	198	T:17-37,T:50-70,T:108-128,T:178-198	https://link.springer.com/article/10.1007/s00424-020-02464-4	17	37
Q5JW98	Calcium homeostasis modulator protein 4	CALHM4 (C6orf78, FAM26D)	Tdark	314	CALHM	Unclassified		CALHM		pore-forming	calcium(*)	voltage-gated(*)	PMID: 32374262	Pore-forming subunit of a voltage-gated ion channel	No	CALHM	no			6YTO		4	262	258	Yes	4	262	4	4	1	4	4	16	207	T:16-36,T:49-69,T:104-124,T:187-207	https://elifesciences.org/articles/55853/figures#content	49	69
Q8N5C1	Calcium homeostasis modulator protein 5	CALHM5 (C6orf188, FAM26E)	Tdark	309	CALHM	Unclassified		CALHM		pore-forming	calcium(*)	voltage-gated(*)	PMID: 33298887	Pore-forming subunit of a voltage-gated ion channel	No	CALHM	no			7D65		4	276	272	Yes	4	276	3	3	1	4	4	17	201	T:17-37,T:49-69,T:99-119,T:181-201	https://www.ncbi.nlm.nih.gov/pmc/articles/PMC7015811/	19	69
Q5R3K3	Calcium homeostasis modulator protein 6	CALHM6 (C6orf187, FAM26F)	Tbio	315	CALHM	Unclassified		CALHM		pore-forming	calcium(*)	voltage-gated(*)	PMID: 32374262	Pore-forming subunit of a voltage-gated ion channel	No	CALHM	no			6YTX		10	304	294	Yes	10	304	4	4	1|2|3	4	4	19	196	T:19-39,T:52-72,T:104-124,T:176-196	https://elifesciences.org/articles/55853/figures#content	19	39	52	72	104	124
Q8TDI8	Transmembrane channel-like protein 1	TMC1	Tbio	760	TMC	Unclassified		TMC		pore-forming	calcium, non-selective cation	mechanosensitive, voltage-gated	PMID: 11850618, PMID: 23871232	Probable ion channel required for the normal function of cochlear hair cells.	No	TMC	no		TOMT, PCDH15, CIB2, CIB3		AF-Q8TDI8-F1	200	720	520	Yes			6	6	1;6	6	6	200	720	T:200-220,T:273-293,T:366-386,T:441-461,T:635-655,T:700-720	https://pubmed.ncbi.nlm.nih.gov/31761710/	200	720
Q8TDI7	Transmembrane channel-like protein 2	TMC2 (C20orf145)	Tbio	906	TMC	Unclassified		TMC		pore-forming	calcium, non-selective cation	mechanosensitive, voltage-gated(*)	PMID: 11850618, PMID: 23871233	Probable ion channel required for the normal function of cochlear hair cells.	No	TMC	no		TOMT, PCDH15, CIB2		AF-Q8TDI7-F1	264	771	507	Yes			9	9	1;6	6	6	264	771	T:264-284,T:337-357,T:432-452,T:509-529,T:694-714,T:751-771	https://pubmed.ncbi.nlm.nih.gov/31761710/	264	771
Q7Z5M5	Transmembrane channel-like protein 3	TMC3	Tdark	1100	TMC	Unclassified		TMC		pore-forming	non-selective cation(probable)(*)	mechanosensitive(*)	PMID: 12906855	Probable ion channel.	No	TMC	no				AF-Q7Z5M5-F1	149	700	551	Yes			10	10		10	10	149	700	T:149-169,T:193-213,T:226-246,T:320-340,T:362-382,T:394-414,T:509-529,T:570-590,T:619-639,T:680-700
Q7Z404	Transmembrane channel-like protein 4	TMC4	Tdark	712	TMC	Unclassified		TMC		pore-forming	non-selective cation(probable)(*)	mechanosensitive(*)	PMID: 12906855	Probable ion channel.	No	TMC	no		ANO5, ANO6, TPCN1		AF-Q7Z404-F1	169	677	508	Yes			8	8		9	9	169	677	T:169-189,T:250-270,T:349-369,T:395-415,T:426-446,T:484-504,T:543-565,T:593-613,T:655-677
Q6UXY8	Transmembrane channel-like protein 5	TMC5	Tbio	1006	TMC	Unclassified		TMC		pore-forming	non-selective cation(probable)(*)	mechanosensitive(*)	PMID: 12812529, PMID: 12906855	Probable ion channel.	No	TMC	no		CALML3, CALML5, CLIC3		AF-Q6UXY8-F1	459	921	462	Yes			9	9		10	10	459	921	T:459-479,T:486-508,T:526-546,T:620-640,T:655-675,T:699-719,T:733-753,T:787-807,T:836-856,T:901-921
Q7Z403	Transmembrane channel-like protein 6	TMC6 (EVER1, EVIN1)	Tbio	805	TMC	Unclassified		TMC		pore-forming	non-selective cation(probable)(*)	mechanosensitive(*)	PMID: 12906855	Probable ion channel.	No	TMC	no		CIB1		AF-Q7Z403-F1	210	743	533	Yes			10	10		10	10	210	743	T:210-230,T:250-270,T:339-359,T:432-452,T:470-490,T:506-526,T:554-574,T:605-625,T:651-671,T:723-743
Q7Z402	Transmembrane channel-like protein 7	TMC7	Tdark	723	TMC	Unclassified		TMC		pore-forming	non-selective cation(probable)(*)	mechanosensitive(*)	PMID: 12906855	Probable ion channel.	No	TMC	no				AF-Q7Z402-F1	169	686	517	Yes			9	9		9	9	169	686	T:169-189,T:220-240,T:264-284,T:363-383,T:405-425,T:495-515,T:556-576,T:602-622,T:666-686
Q8IU68	Transmembrane channel-like protein 8	TMC8 (EVER2, EVIN2)	Tbio	726	TMC	Unclassified		TMC		pore-forming	non-selective cation(probable)(*)	mechanosensitive(*)	PMID: 12906855	Probable ion channel.	No	TMC	no		CIB1		AF-Q8IU68-F1	115	615	500	Yes			8	8		8	8	115	615	T:115-135,T:201-221,T:300-320,T:339-359,T:427-447,T:489-509,T:532-552,T:595-615
Q7RTM1	Proton channel OTOP1	OTOP1	Tbio	612	OTOP	Unclassified		OTOP		pore-forming	proton	proton-gated	PMID: 35920807	Proton-selective channel activity is probably required in cell types that use changes in intracellular pH for cell signaling or to regulate biochemical or developmental processes	No	Otopetrin	no				AF-Q7RTM1-F1	67	596	529	Yes					5|6 11|12	12	12	67	596	T:67-87,T:92-112,T:137-157,T:168-188,T:201-221,T:269-289,T:311-331,T:346-366,T:393-413,T:424-444,T:545-565,T:576-596	https://scholar.google.com/scholar_lookup?title=Vertebrate+OTOP1+is+also+an+alkali-activated+channel&author=Tian+L&author=Zhang+H&author%5B2%5D=Yang+S&author%5B3%5D=Luo+A&author%5B4%5D=Kamau+PM&author%5B5%5D=Hu+J&author%5B6%5D=Luo+L&author%5B7%5D=Lai+R&publication_year=2023&journal=Nature+Communications&volume=14&pages=26&pmid=36596786	201	221	269	289	545	565	576	596
Q7RTS6	Proton channel OTOP2	OTOP2	Tbio	562	OTOP	Unclassified		OTOP		pore-forming	proton	proton-gated	PMID: 35920807	Proton-selective channel that specifically transports protons into cells. Proton-selective channel activity is probably required in cell types that use changes in intracellular pH for cell signaling or to regulate biochemical or developmental processes.	No	Otopetrin	no				AF-Q7RTS6-F1	30	547	517	Yes					3;6 9;12	12	12	30	547	T:30-50,T:62-82,T:100-120,T:137:157,T:169-189,T:241-261,T:289-309,T:324-344,T:371-391,T:402-422,T:495-515,T:527-547	https://scholar.google.com/scholar_lookup?title=Structural+and+functional+characterization+of+an+otopetrin+family+proton+channel&author=Chen+Q&author=Zeng+W&author%5B2%5D=She+J&author%5B3%5D=Bai+XC&author%5B4%5D=Jiang+Y&publication_year=2019&journal=eLife&volume=8&pages=e46710&pmid=30973323	100	120	137	157	169	189	241	261	371	391	402	422	495
Q7RTS5	Proton channel OTOP3	OTOP3	Tdark	596	OTOP	Unclassified		OTOP		pore-forming	proton	proton-gated	PMID: 35920807	Proton-selective channel that specifically transports protons into cells. Proton-selective channel activity is probably required in cell types that use changes in intracellular pH for cell signaling or to regulate biochemical or developmental processes.	No	Otopetrin	Znf_C2H2_type				AF-Q7RTS5-F1	89	589	500	Yes					3;6 9;12	12	12	89	589	T:89-109,T:120-143,T:160-181,T:194-217,T:226-248,T:296-312,T:339-358,T:373-395,T:414-435,T:447-469,T:530-547,T:567-589	https://scholar.google.com/scholar_lookup?title=Structural+and+functional+characterization+of+an+otopetrin+family+proton+channel&author=Chen+Q&author=Zeng+W&author%5B2%5D=She+J&author%5B3%5D=Bai+XC&author%5B4%5D=Jiang+Y&publication_year=2019&journal=eLife&volume=8&pages=e46710&pmid=30973323	159	179	194	214	227	247	290	310	417	437	449	469	530
Q9H6F2	Trimeric intracellular cation channel type A	TMEM38A	Tbio	299	Unclassified	Unclassified				pore-forming	cation(*)	voltage-gated(*)	PMID: 17611541, PMID: 30770441	Monovalent cation channel required for maintenance of rapid intracellular calcium release	No	TRIC_channel	no	PIP2			AF-Q9H6F2-F1	19	255	236	Yes			4	4		7	7	19	255	T:19-39,T:52-72,T:86-106,T:145-165,T:179-199,T:210-230,T:235-255
Q9NVV0	Trimeric intracellular cation channel type B	TMEM38B (C9orf87)	Tbio	291	Unclassified	Unclassified				pore-forming	potassium(*)	voltage-gated(*)	PMID: 30770441	Monovalent cation channel required for maintenance of rapid intracellular calcium release. May act as a potassium counter-ion channel that functions in synchronization with calcium release from intracellular stores.	No	TRIC	no		PIP2		AF-Q9NVV0-F1	20	227	207	Yes			4	4		7	7	20	227	T:20-33,T:51-70,T:83-99,T:105-121,T:140-156,T:180-195,T:208-227
O94886	CSC1-like protein 1	TMEM63A (KIAA0489, KIAA0792)	Tbio	807	Unclassified	Unclassified				pore-forming	calcium(*)	mechanosensitive(*)	PubMed:30382938, PubMed:31587869	Acts as an osmosensitive calcium-permeable cation channel	No	Csc1-like, RSN1_7TM	PHM7				AF-O94886-F1	50	718	668	Yes			11	11	3;7	10	10	50	718	T:50-70,T:146-166,T:191-211,T:423-443,T:462-482,T:508-528,T:553-573,T:620-640,T:665-685,T:698-718	https://scholar.google.com/scholar?hl=en&as_sdt=0%2C11&q=Heterozygous+Variants+in+the+Mechanosensitive+Ion+Channel+TMEM63A+Result+in+Transient+Hypomyelination+during+Infancy&btnG=	191	211	423	443	462	482	508	528	553	573
Q5T3F8	CSC1-like protein 2	TMEM63B (C6orf110)	Tdark	832	Unclassified	Unclassified				pore-forming	calcium	mechanosensitive	PMID: 31243992	Acts as an osmosensitive calcium-permeable cation channel	No	Csc1-like, RSN1_7TM	PHM7				AF-Q5T3F8-F1	41	731	690	Yes			11	11		10	10	41	731	T:41-61,T:158-178,T:203-223,T:435-455,T:481-501,T:521-541,T:560-580,T:630-650,T:678-698,T:711-731
Q9P1W3	Calcium permeable stress-gated cation channel 1	TMEM63C (C14orf171, CSC1)	Tbio	806	Unclassified	Unclassified				pore-forming	non-specific cation(*)	stress-gated(*)	PubMed:24503647	Acts as an osmosensitive calcium-permeable cation channel	No	Csc1-like, RSN1_7TM	no				AF-Q9P1W3-F1	35	204	169	Yes			10	10	4;8	3	3	35	204	T:35-55,T:137-157,T:184-204	https://scholar.google.com/scholar?hl=en&as_sdt=0%2C11&q=Structure+of+the+hyperosmolality-gated+calcium-permeable+channel+OSCA1.2&btnG=	410	430	457	477	496	516	542	562
Q9BXS9	Solute carrier family 26 member 6	SLC26A6	Tbio	759	Unclassified	Unclassified				pore-forming	anion	voltage-gated	PMID: 33553213	NOTE: Molecular function listed as channel DIDS-sensitive inorganic and organic anion transporter that mediates the uptake of monovalent anions like chloride, bicarbonate, formate and hydroxyl ion and divalent anions like sulfate and oxalate	No		STAS_dom				AF-Q9BXS9-F1	116	505	389	Yes			9	9		8	8	116	505	T:116-136,T:187-207,T:264-284,T:294-314,T:348-368,T:380-400,T:417-437,T:485-505
Q7LBE3	Solute carrier family 26 member 9	SLC26A9	Tbio	791	Unclassified	Unclassified				pore-forming	chloride	voltage-gated	PMID: 32818062	DIDS- and thiosulfate- sensitive anion exchanger mediating chloride, sulfate and oxalate transport	No	STAS	no			7CH1		71	489	418	Yes			9	9		15	14	71	489	T:71-96,T:100-117,T:129-142,T:172-190,T:203-224,I:236-244,T:255-273,T:282-297,T:328-348,T:367-382,T:391-400,T:405-423,T:429-450,T:465-476,T:478-489
P04839	Cytochrome b-245 heavy chain	CYBB (NOX2)	Tchem	570	Unclassified	Unclassified				pore-forming	proton(*)	voltage-gated(*)	PMID: 28351984	functions as a voltage-gated proton channel that mediates the H+ currents of resting phagocytes.	No		FAD-bd_FR_type, NAD_binding	NCF1, NCF2, NCF4	NRROS, GBP7	8GZ3		9	282	273	Yes			4	4		6	6	9	282	T:9-29,T:49-69,T:103-123,T:170-190,T:201-221,T:262-282
Q15049	Membrane protein MLC1	MLC1 (KIAA0027, WKL1)	Tbio	377	Unclassified	Unclassified				pore-forming	chloride(*)	voltage-gated(*)	PMID: 24647135	ion channel listed as GO molecular function	No		no				AF-Q15049-F1	52	324	272	Yes			7	7		8	8	52	324	T:52-72,T:82-100,T:111-131,T:144-164,T:199-219,T:230-250,T:257-277,T:304-324
Q9H313	Protein tweety homolog 1	TTYH1	Tbio	450	TTYH	Unclassified		TTYH		pore-forming	chloride	volume-gated	PMID: 15010458	Probable chloride channel. May be involved in cell adhesion (By similarity)	No	Tweety	no			7P5J		44	411	367	Yes			5	5		5	5	44	411	T:44-64,T:89-109,T:215-235,T:241-261,T:391-411
Q9BSA4	Protein tweety homolog 2	TTYH2 (C17orf29)	Tbio	534	TTYH	Unclassified		TTYH		pore-forming	chloride	volume-gated	PMID: 15010458	Probable large-conductance Ca2+-activated chloride channel. May play a role in Ca2+ signal transduction. May be involved in cell proliferation and cell aggregation.	No	Tweety	no			7P5M		45	409	364	Yes			6	6		5	5	45	409	T:45-65,T:88-108,T:214-234,T:241-261,T:389-409
Q9C0H2	Protein tweety homolog 3	TTYH3 (KIAA1691)	Tbio	523	TTYH	Auxiliary unclassified		TTYH		auxiliary			PMID: 15010458, PMID: 34385445, PMID: 34824283	Probable large-conductance Ca2+-activated chloride channel. May play a role in Ca2+ signal transduction.	Yes	Tweety	no			7P5C					Yes			5	5		5	5	43	407	T:43-63,T:87-107,T:212-232,T:237-257,T:387-407
Q99469	SH3 and cysteine-rich domain-containing protein	STAC (STAC1)	Tbio	402	STAC	Auxiliary unclassified		STAC		auxiliary			PubMed:29078335	Promotes expression of the ion channel CACNA1H at the cell membrane, and thereby contributes to the regulation of channel activity. Plays a minor and redundant role in promoting the expression of calcium channel CACNA1S at the cell membrane, and thereby contributes to increased channel activity. Slows down the inactivation rate of the calcium channel CACNA1C.	Yes		SH3, C1, Stac			6B25					No			0	0
Q6ZMT1	SH3 and cysteine-rich domain-containing protein 2	STAC2	Tbio	411	STAC	Auxiliary unclassified		STAC		auxiliary			PubMed:29078335	Plays a redundant role in promoting the expression of calcium channel CACNA1S at the cell membrane, and thereby contributes to increased channel activity. Slows down the inactivation rate of the calcium channel CACNA1C	Yes		SH3, C1, Stac			6B28					No			0	0
Q96MF2	SH3 and cysteine-rich domain-containing protein 3	STAC3	Tbio	364	STAC	Auxiliary unclassified		STAC		auxiliary			PubMed:29078335	Slows down the inactivation rate of the calcium channel CACNA1C. Required for normal Ca2+ release from the sarcplasmic reticulum, which ultimately leads to muscle contraction. Probably functions via its effects on muscle calcium channels	Yes		SH3, C1, Stac			STAC3	6UY7				No			0	0
Q13586	Stromal interaction molecule 1	STIM1 (GOK)	Tbio	685	STIM	Auxiliary unclassified		STIM		auxiliary			PubMed:16208375, PubMed:16537481	Plays a role in mediating store-operated Ca2+ entry (SOCE), a Ca2+ influx following depletion of intracellular Ca2+ stores	Yes		EF-hand, coiled coil, SAM			4O9B					Yes			1	1		1	1	214	234	T:214-234
Q9P246	Stromal interaction molecule 2	STIM2 (KIAA1482)	Tbio	746	STIM	Auxiliary unclassified		STIM		auxiliary			PMID: 17905723	Plays a role in mediating store-operated Ca2+ entry (SOCE), a Ca2+ influx following depletion of intracellular Ca2+ stores. Functions as a highly sensitive Ca2+ sensor in the endoplasmic reticulum which activates both store-operated and store-independent Ca2+-influx.	Yes		EF-hand, coiled coil, SAM			2L5Y					Yes			0	0		1	1	219	235	T:219-235
Q6PI25	Protein cornichon homolog 2	CNIH2 (CNIL)	Tbio	160	CNIH	Auxiliary unclassified		CNIH		auxiliary			PMID: 20805473	Regulates the trafficking and gating properties of AMPA-selective glutamate receptors (AMPARs)	Yes	Cornichon	no				AF-Q6PI25-F1				Yes			3	3		3	3	11	159	T:11-31,T:73-93,T:139-159
Q8TBE1	Protein cornichon homolog 3	CNIH3	Tbio	160	CNIH	Auxiliary unclassified		CNIH		auxiliary			PMID: 20805473	Regulates the trafficking and gating properties of AMPA-selective glutamate receptors (AMPARs)	Yes	Cornichon	no				AF-Q8TBE1-F1				Yes			3	3		3	3	11	159	T:11-31,T:73-93,T:139-159
Q9NZU7	Calcium-binding protein 1	CABP1	Tbio	370	CABP	Auxiliary unclassified		CABP		auxiliary			PubMed:14570872	Causes calcium-dependent facilitation and inhibits inactivation of L-type calcium channels by binding to the same sites as calmodulin in the C-terminal domain of CACNA1C, but has an opposite effect on channel function	Yes	CaBP1/2/4/5	EF-hand			3OX5					No			0	0
Q9NPB3	Calcium-binding protein 2	CABP2	Tbio	220	CABP	Auxiliary unclassified		CABP		auxiliary			PubMed:28183797	Required for sound encoding at inner hair cells (IHCs) synapses, likely via inhibition of the inactivation of voltage-gated calcium channel of type 1.3 (Cav1.3) in the IHCs (PubMed:28183797).	Yes	CaBP1/2/4/5	EF-hand				AF-Q9NPB3-F1				No			0	0
P57796	Calcium-binding protein 4	CABP4	Tbio	275	CABP	Auxiliary unclassified		CABP		auxiliary			PMID: 22936811	Involved in normal synaptic function through regulation of Ca2+ influx and neurotransmitter release in photoreceptor synaptic terminals and in auditory transmission. Modulator of CACNA1D and CACNA1F, suppressing the calcium-dependent inactivation and shifting the activation range to more hyperpolarized voltages (By similarity)	Yes	CaBP1/2/4/5	EF-hand		UNC119		AF-P57796-F1				No			0	0
Q9NP86	Calcium-binding protein 5	CABP5 (CABP3)	Tbio	173	CABP	Auxiliary unclassified		CABP		auxiliary			PMID: 18586882	Inhibits calcium-dependent inactivation of L-type calcium channel and shifts voltage dependence of activation to more depolarized membrane potentials (By similarity).	Yes	CaBP1/2/4/5	EF-hand		STXBP1, MYO6		AF-Q9NP86-F1				No			0	0
Q9P2D8	Protein unc-79 homolog	UNC79 (KIAA1409)	Tbio	2635	Auxiliary unclassified	Auxiliary unclassified				auxiliary			PMID: 32494638	Auxiliary subunit of the NALCN sodium channel complex, a voltage-gated ion channel responsible for the resting Na+ permeability that controls neuronal excitability. Activated by neuropeptides substance P, neurotensin, and extracellular calcium that regulates neuronal excitability by controlling the sizes of NALCN-dependent sodium-leak current.	Yes		ARM			7WJI					Yes			0	0		2	2	2223	2486	T:2223-2243,T:2466-2486
Q8N2C7	Protein unc-80 homolog	UNC80 (C2orf21, KIAA1843)	Tbio	3258	Auxiliary unclassified	Auxiliary unclassified				auxiliary			PMID: 32494638	Auxiliary subunit of the NALCN sodium channel complex, a voltage-gated ion channel responsible for the resting Na+ permeability that controls neuronal excitability (By similarity).	Yes		no		UNC79	7WJI					Yes			0	0		4	4	2268	2851	T:2268-2288,T:2398-2418,T:2785-2805,T:2831-2851
Q07699	Sodium channel subunit beta-1	SCN1B	Tbio	218	Auxiliary unclassified	Auxiliary unclassified				auxiliary			PubMed:15525788, PubMed:21994374, PubMed:30190309	Regulatory subunit of multiple voltage-gated sodium channel complexes	Yes	Na_channel_b1/b3	Ig-like_dom			7W9L					Yes			1	1		1	1	161	182	T:161-182
O60939	Sodium channel subunit beta-2	SCN2B	Tbio	215	Auxiliary unclassified	Auxiliary unclassified				auxiliary			PMID: 30765605	Crucial in the assembly, expression, and functional modulation of the heterotrimeric complex of the sodium channel. The subunit beta-2 causes an increase in the plasma membrane surface area and in its folding into microvilli	Yes		Ig-like_dom	SCN1B, SCN2B, SCN3B, SCN4B		7W9L					Yes			1	1		1	1	160	180	T:160-180
Q9NY72	Sodium channel subunit beta-3	SCN3B (KIAA1158)	Tbio	215	Auxiliary unclassified	Auxiliary unclassified				auxiliary			PMID: 11744748	Modulates channel gating kinetics.	Yes		Ig-like			7TJ9					Yes			1	1		1	1	160	180	T:160-180
Q8IWT1	Sodium channel subunit beta-4	SCN4B	Tbio	228	Auxiliary unclassified	Auxiliary unclassified				auxiliary			PubMed:24297919	Modulates channel gating kinetics. Causes negative shifts in the voltage dependence of activation of certain alpha sodium channels, but does not affect the voltage dependence of inactivation.	Yes		Ig-like_dom	SCN2B		7DTD					Yes			1	1		1	1	163	183	T:163-183
Q02641	Voltage-dependent L-type calcium channel subunit beta-1	CACNB1	Tbio	598	Auxiliary unclassified	Auxiliary unclassified				auxiliary			PubMed:1309651, PubMed:8107964, PubMed:15615847	Regulatory subunit of L-type calcium channels	Yes	VGCC_beta, GK/Ca_channe	SH3, P-loop	CACNB1, CACNB2, CACNG1, CACNA2D1	JSRP1, RYR1, CBARP	7VFW					No			0	0
Q08289	Voltage-dependent L-type calcium channel subunit beta-2	CACNB2 (CACNLB2, MYSB)	Tbio	660	Auxiliary unclassified	Auxiliary unclassified				auxiliary			PMID: 19358333	The beta subunit of voltage-dependent calcium channels contributes to the function of the calcium channel by increasing peak calcium current, shifting the voltage dependencies of activation and inactivation, modulating G protein inhibition and controlling the alpha-1 subunit membrane targeting.	Yes	VGCC_beta, GK/Ca_channe	SH3, P-loop	CACNB1, CACNB2, CACNG1, CACNA2D1	RRAD, TMIGD2, CAMK2D, CAMK2A, CBARP		AF-Q08289-F1				No			0	0
P54284	Voltage-dependent L-type calcium channel subunit beta-3	CACNB3 (CACNLB3)	Tbio	484	Auxiliary unclassified	Auxiliary unclassified				auxiliary			PubMed:29742403	Regulatory subunit of the voltage-gated calcium channel that gives rise to L-type calcium currents	Yes	VGCC_beta, GK/Ca_channe	SH3, P-loop	CACNA2D1, CACNA2D4	FASLG, CBARP	8E5A / 8E5B					No			0	0
O00305	Voltage-dependent L-type calcium channel subunit beta-4	CACNB4 (CACNLB4)	Tbio	520	Auxiliary unclassified	Auxiliary unclassified				auxiliary			PMID: 11880487	The beta subunit of voltage-dependent calcium channels contributes to the function of the calcium channel by increasing peak calcium current, shifting the voltage dependencies of activation and inactivation, modulating G protein inhibition and controlling the alpha-1 subunit membrane targeting.	Yes	VGCC_beta	SH3, P-loop		FASLG, CBARP	2D46					No			0	0
Q99946	Proline-rich transmembrane protein 1	PRRT1 (C6orf31, NG5)	Tbio	306	Auxiliary unclassified	Auxiliary unclassified				auxiliary			PMID: 29490264	Required to maintain a pool of extrasynaptic AMPA-regulated glutamate receptors (AMPAR) which is necessary for synapse development and function. Regulates basal AMPAR function and synaptic transmission during development but is dispensable at mature hippocampal synapses. Plays a role in regulating basal phosphorylation levels of glutamate receptor GRIA1 and promotes GRIA1 and GRIA2 cell surface e…	Yes		no	PRRT1, PRRT2, CKAMP44/SHISA9, FRRS1L, NRN1			AF-Q99946-F1				Yes			2	2		2	1	224	296	T:224-244,I:276-296
Q7Z6L0	Proline-rich transmembrane protein 2 ·	PRRT2	Tbio	340	Auxiliary unclassified	Auxiliary unclassified				auxiliary			PMID: 12032348	As a component of the outer core of AMPAR complex, may be involved in synaptic transmission in the central nervous system. In hippocampal neurons, in presynaptic terminals, plays an important role in the final steps of neurotransmitter release, possibly by regulating Ca2+-sensing. In the cerebellum, may inhibit SNARE complex formation and down-regulate short-term facilitation.	Yes		no	PRRT1, PRRT2, CKAMP44/SHISA9, FRRS1L, NRN1			AF-Q7Z6LO-F1				Yes			2	2		2	1	269	338	I:269-289,T:318-338
P42658	Dipeptidyl aminopeptidase-like protein 6	DPP6	Tbio	865	Auxiliary unclassified	Auxiliary unclassified				auxiliary			PubMed:18364354	Modulates the activity and gating characteristics of the potassium channel KCND2. Promotes cell surface expression of the potassium channel KCND2	Yes		AB_hydrolase, Peptidase_S9		KCNIP2	7E8G / 7E8H					Yes			1	1		1	1	96	116	T:96-116
Q8N608	Inactive dipeptidyl peptidase 10	DPP10 (DPRP3, KIAA1492)	Tbio	796	Auxiliary unclassified	Auxiliary unclassified				auxiliary			PubMed:15454437	Modulates the activity and gating characteristics of the potassium channel KCND2. Promotes cell surface expression of the potassium channel KCND2	Yes		AB_hydrolase, Peptidase_S10			4WJL					Yes			1	1		1	1	35	55	T:35-55
Q2I0M4	Leucine-rich repeat-containing protein 26	LRRC26 (CAPC)	Tbio	334	Auxiliary unclassified	Auxiliary unclassified				auxiliary			PMID: 22547800	Auxiliary protein of the large-conductance, voltage and calcium-activated potassium channel (BK alpha).	Yes	LRR_dom	no				AF-Q2I0M4-F1				Yes			1	1		1	1	262	282	T:262-282
Q8N7C0	Leucine-rich repeat-containing protein 52	LRRC52	Tbio	313	Auxiliary unclassified	Auxiliary unclassified				auxiliary			PMID: 22547800	Auxiliary protein of the large-conductance, voltage and calcium-activated potassium channel (BK alpha).	Yes	LRR_dom	no				AF-Q8N7C0-F1				Yes			1	1		1	1	245	265	T:245-265
Q6ZSJ9	Protein shisa-6	SHISA6	Tdark	500	Auxiliary unclassified	Auxiliary unclassified				auxiliary			PMID: 32004381	Auxillary protein (AMPA receptor structure and auxiliary subunits-Aichurok Kamalova and Terunaga Nakagawa)	Yes		PDZ-binding		DLG4		AF-Q6ZSJ9-F1				No
B4DS77	Protein shisa-9	SHISA9	Tbio	424	Auxiliary unclassified	Auxiliary unclassified				auxiliary			PMID: 32004381	Auxillary protein (AMPA receptor structure and auxiliary subunits-Aichurok Kamalova and Terunaga Nakagawa)	Yes		Shisa								No
Q6UXU4	Germ cell-specific gene 1-like protein	GSG1L	Tbio	331	Auxiliary unclassified	Auxiliary unclassified				auxiliary			PMID: 26658868	As a component of the inner core of AMPAR complex, modifies AMPA receptor (AMPAR) gating	Yes		GSG-1	CACNG2, CACNG3, CACNG4, CACNG8, GSG1L			AF-Q6UXU4-F1				Yes			4	4		4	4	9	238	T:9-29,T:133-153,T:174-194,T:218-238
Q8NE86	Calcium uniporter protein, mitochondrial	MCU (C10orf42, CCDC109A)	Tbio	351	Auxiliary unclassified	Auxiliary unclassified				auxiliary			PMID: 32494073	Mitochondrial inner membrane calcium uniporter that mediates calcium uptake into mitochondria; has ion channel listed as GO molecular function	Yes					6XJX					Yes			3	3		2	2	234	283	T:234-256,T:266-283
Q8WXS4	Voltage-dependent calcium channel gamma-like subunit	TMEM37 (PR)	Tbio	190	Auxiliary unclassified	Auxiliary unclassified				auxiliary			By similarity	Thought to stabilize the calcium channel in an inactivated (closed) state. Modulates calcium current when coexpressed with CACNA1G (By similarity).	Yes	Tmem37	no				AF-Q8WXS4-F1				Yes			4	4		4	4	25	175	T:25-45,T:96-116,T:131-151,T:155-175
Q9H7V2	Synapse differentiation-inducing gene protein 1	SYNDIG1	Tdark	258	Auxiliary unclassified	Auxiliary unclassified				auxiliary			PMID: 32004381	Auxillary protein (AMPA receptor structure and auxiliary subunits-Aichurok Kamalova and Terunaga Nakagawa)	Yes		Dispanin_fam				AF-Q9H7V2-F1				No
[truncated: 3 more columns]

## Sheet: Table B
Table B: Table showing the presence/absence of curated human IC channels in other ion channel databases listed in KEGG, GtoP and Pharos
Uniprot	Name	Symbol	Family designation	Group	Auxiliary	In KEGG?	In GtoP?	In Pharos?
O75762	Transient receptor potential cation channel subfamily A member 1	TRPA1 (ANKTM1)	TRP	VGIC	No	Yes	Yes	Yes
P48995	Short transient receptor potential channel 1	TRPC1 (TRP1)	TRP	VGIC	No	Yes	Yes	Yes
Q13507	Short transient receptor potential channel 3	TRPC3 (TRP3)	TRP	VGIC	No	Yes	Yes	Yes
Q9UBN4	Short transient receptor potential channel 4¬†	TRPC4	TRP	VGIC	No	Yes	Yes	Yes
Q9UL62	Short transient receptor potential channel 5¬†	TRPC5 (TRP5)	TRP	VGIC	No	Yes	Yes	Yes
Q9Y210	Short transient receptor potential channel 6¬†	TRPC6 (TRP6)	TRP	VGIC	No	Yes	Yes	Yes
Q9HCX4	Short transient receptor potential channel 7	TRPC7 (TRP7)	TRP	VGIC	No	Yes	Yes	Yes
Q7Z4N2	Transient receptor potential cation channel subfamily M member 1	TRPM1 (LTRPC1, MLSN, MLSN1)	TRP	VGIC	No	Yes	Yes	Yes
O94759	Transient receptor potential cation channel subfamily M member 2	TRPM2 (EREG1, KNP3, LTRPC2, TRPC7)	TRP	VGIC	No	Yes	Yes	Yes
Q9HCF6	Transient receptor potential cation channel subfamily M member 3	TRPM3 (KIAA1616, LTRPC3)	TRP	VGIC	No	Yes	Yes	Yes
Q8TD43	Transient receptor potential cation channel subfamily M member 4	TRPM4 (LTRPC4)	TRP	VGIC	No	Yes	Yes	Yes
Q9NZQ8	Transient receptor potential cation channel subfamily M member 5	TRPM5 (LTRPC5, MTR1)	TRP	VGIC	No	Yes	Yes	Yes
Q9BX84	Transient receptor potential cation channel subfamily M member 6¬†	TRPM6 (CHAK2)	TRP	VGIC	No	Yes	Yes	No
Q96QT4	Transient receptor potential cation channel subfamily M member 7¬†	TRPM7 (CHAK1, LTRPC7)	TRP	VGIC	No	Yes	Yes	Yes
Q7Z2W7	Transient receptor potential cation channel subfamily M member 8	TRPM8 (LTRPC6, TRPP8)	TRP	VGIC	No	Yes	Yes	Yes
Q8NER1	Transient receptor potential cation channel subfamily V member 1	TRPV1 (VR1)	TRP	VGIC	No	Yes	Yes	Yes
Q9Y5S1	Transient receptor potential cation channel subfamily V member 2	TRPV2 (VRL)	TRP	VGIC	No	Yes	Yes	Yes
Q8NET8	Transient receptor potential cation channel subfamily V member 3	TRPV3	TRP	VGIC	No	Yes	Yes	Yes
Q9HBA0	Transient receptor potential cation channel subfamily V member 4	TRPV4 (VRL2, VROAC)	TRP	VGIC	No	Yes	Yes	Yes
Q9NQA5	Transient receptor potential cation channel subfamily V member 5	TRPV5 (ECAC1)	TRP	VGIC	No	Yes	Yes	Yes
Q9H1D0	Transient receptor potential cation channel subfamily V member 6	TRPV6 (ECAC2)	TRP	VGIC	No	Yes	Yes	Yes
Q9GZU1	Mucolipin-1	MCOLN1 (ML4, TRPML1)	TRP	VGIC	No	Yes	Yes	Yes
Q8IZK6	Mucolipin-2¬†	MCOLN2	TRP	VGIC	No	Yes	Yes	Yes
Q8TDD5	Mucolipin-3	MCOLN3	TRP	VGIC	No	Yes	Yes	Yes
P98161	Polycystin-1	PKD1	TRP	VGIC	No	Yes	No	No
Q8TDX9	Polycystic kidney disease protein 1-like 1	PKD1L1	TRP	VGIC	Yes	Yes	No	Yes
Q7Z442	Polycystic kidney disease protein 1-like 2	PKD1L2 (KIAA1879, PC1L2)	TRP	VGIC	No	Yes	No	Yes
Q7Z443	Polycystic kidney disease protein 1-like 3¬†	PKD1L3	TRP	VGIC	No	Yes	No	Yes
Q13563	Polycystin-2	PKD2 (TRPP2)	TRP	VGIC	No	Yes	Yes	Yes
Q9P0L9	Polycystic kidney disease 2-like 1 protein	PKD2L1 (PKD2L, PKDL, TRPP3)	TRP	VGIC	No	Yes	Yes	Yes
Q9NZM6	Polycystic kidney disease 2-like 2 protein¬†	PKD2L2	TRP	VGIC	No	Yes	Yes	Yes
P29973	cGMP-gated cation channel alpha-1	CNGA1 (CNCG, CNCG1)	CNG	VGIC	No	Yes	Yes	Yes
Q16280	Cyclic nucleotide-gated olfactory channel¬†	CNGA2 (CNCA, CNCA1, CNCG2)	CNG	VGIC	No	Yes	Yes	Yes
Q16281	Cyclic nucleotide-gated cation channel alpha-3	CNGA3 (CNCG3)	CNG	VGIC	No	Yes	Yes	Yes
Q8IV77	Cyclic nucleotide-gated cation channel alpha-4	CNGA4	CNG	VGIC	No	Yes	Yes	Yes
Q14028	Cyclic nucleotide-gated cation channel beta-1	CNGB1 (CNCG2, CNCG3L, CNCG4, RCNC2)	CNG	VGIC	No	Yes	Yes	Yes
Q9NQW8	Cyclic nucleotide-gated cation channel beta-3 ¬∑¬†	CNGB3	CNG	VGIC	No	Yes	Yes	Yes
O60741	Potassium/sodium hyperpolarization-activated cyclic nucleotide-gated channel 1	HCN1 (BCNG1)	HCN	VGIC	No	Yes	Yes	Yes
Q9UL51	Potassium/sodium hyperpolarization-activated cyclic nucleotide-gated channel 2	HCN2 (BCNG2)	HCN	VGIC	No	Yes	Yes	Yes
Q9P1Z3	Potassium/sodium hyperpolarization-activated cyclic nucleotide-gated channel 3	HCN3 (KIAA1535)	HCN	VGIC	No	Yes	Yes	Yes
Q9Y3Q4	Potassium/sodium hyperpolarization-activated cyclic nucleotide-gated channel 4	HCN4	HCN	VGIC	No	Yes	Yes	Yes
Q8NEC5	Cation channel sperm-associated protein 1	CATSPER1	CatSper	VGIC	No	Yes	Yes	Yes
Q96P56	Cation channel sperm-associated protein 2	CATSPER2	CatSper	VGIC	No	Yes	Yes	Yes
Q86XQ3	Cation channel sperm-associated protein 3	CATSPER3	CatSper	VGIC	No	Yes	Yes	Yes
Q7RTX7	Cation channel sperm-associated protein 4¬†	CATSPER4	CatSper	VGIC	No	Yes	Yes	Yes
Q9ULQ1	Two pore channel protein 1	TPCN1 (KIAA1169, TPC1)	TPC	VGIC	No	Yes	Yes	Yes
Q8NHX9	Two pore channel protein 2	TPCN2 (TPC2)	TPC	VGIC	No	Yes	Yes	Yes
Q96D96	Voltage-gated hydrogen channel 1¬†	HVCN1 (VSOP)	HV1	VGIC	No	Yes	Yes	Yes
P21817	Ryanodine receptor 1¬†	RYR1 (RYDR)	RyR	VGIC	No	Yes	Yes	Yes
Q92736	Ryanodine receptor 2¬†	RYR2	RyR	VGIC	No	Yes	Yes	Yes
Q15413	Ryanodine receptor 3	RYR3 (HBRR)	RyR	VGIC	No	Yes	Yes	Yes
Q8IZF0	Sodium leak channel NALCN	NALCN (VGCNL1)	NALCN	VGIC	No	Yes	Yes	Yes
B1AL88	NALCN channel auxiliary factor 1	NALF1 (FAM155A, NLF-1)	NALCN	VGIC	Yes	No	No	No
O75949	NALCN channel auxiliary factor 2	NALF2 (FAM155B, TED, TMEM28)	NALCN	VGIC	Yes	No	No	No
B7ZAQ6	Golgi pH regulator A	GPR89A (GPHRA, GPR89, SH120)	GPHR	VGIC	No	No	No	Yes
P0CG08	Golgi pH regulator B¬†	GPR89B (GPHRB, GPR89C)	GPHR	VGIC	No	No	No	Yes
Q9Y342	Plasmolipin	PLLP (PMLP, TM4SF11)	PLLP	VGIC	No	No	No	Yes
O00555	Voltage-dependent P/Q-type calcium channel subunit alpha-1A	CACNA1A (CACH4, CACN3, CACNL1A4)	Ca_V	VGIC	No	Yes	Yes	Yes
Q00975	Voltage-dependent N-type calcium channel subunit alpha-1B¬†	CACNA1B (CACH5, CACNL1A5)	Ca_V	VGIC	No	Yes	Yes	Yes
Q13936	Voltage-dependent L-type calcium channel subunit alpha-1C	CACNA1C (CACH2, CACN2, CACNL1A1, CCHL1A1)	Ca_V	VGIC	No	Yes	Yes	Yes
Q01668	Voltage-dependent L-type calcium channel subunit alpha-1D	CACNA1D (CACH3, CACN4, CACNL1A2, CCHL1A2)	Ca_V	VGIC	No	Yes	Yes	Yes
Q15878	Voltage-dependent R-type calcium channel subunit alpha-1E	CACNA1E (CACH6, CACNL1A6)	Ca_V	VGIC	No	Yes	Yes	Yes
O60840	Voltage-dependent L-type calcium channel subunit alpha-1F¬†	CACNA1F (CACNAF1)	Ca_V	VGIC	No	Yes	Yes	Yes
O43497	Voltage-dependent T-type calcium channel subunit alpha-1G	CACNA1G (KIAA1123)	Ca_V	VGIC	No	Yes	Yes	Yes
O95180	Voltage-dependent T-type calcium channel subunit alpha-1H¬†	CACNA1H	Ca_V	VGIC	No	Yes	Yes	Yes
Q9P0X4	Voltage-dependent T-type calcium channel subunit alpha-1I¬†	CACNA1I (KIAA1120)	Ca_V	VGIC	No	Yes	Yes	Yes
Q13698	Voltage-dependent L-type calcium channel subunit alpha-1S	CACNA1S (CACH1, CACN1, CACNL1A3)	Ca_V	VGIC	No	Yes	Yes	Yes
P35498	Sodium channel protein type 1 subunit alpha	SCN1A (NAC1, SCN1)	Na_V	VGIC	No	Yes	Yes	Yes
Q99250	Sodium channel protein type 2 subunit alpha	SCN2A (NAC2, SCN2A1, SCN2A2)	Na_V	VGIC	No	Yes	Yes	Yes
Q9NY46	Sodium channel protein type 3 subunit alpha¬†	SCN3A (KIAA1356, NAC3)	Na_V	VGIC	No	Yes	Yes	Yes
P35499	Sodium channel protein type 4 subunit alpha	SCN4A	Na_V	VGIC	No	Yes	Yes	Yes
Q14524	Sodium channel protein type 5 subunit alpha	SCN5A	Na_V	VGIC	No	Yes	Yes	Yes
Q01118	Sodium channel protein type 7 subunit alpha	SCN7A (SCN6A)	Na_V	VGIC	No	Yes	No	Yes
Q9UQD0	Sodium channel protein type 8 subunit alpha	SCN8A (MED)	Na_V	VGIC	No	Yes	Yes	Yes
Q15858	Sodium channel protein type 9 subunit alpha	SCN9A (NENA)	Na_V	VGIC	No	Yes	Yes	Yes
Q9Y5Y9	Sodium channel protein type 10 subunit alpha	SCN10A	Na_V	VGIC	No	Yes	Yes	Yes
Q9UI33	Sodium channel protein type 11 subunit alpha¬†	SCN11A (SCN12A, SNS2)	Na_V	VGIC	No	Yes	Yes	Yes
Q09470	Potassium voltage-gated channel subfamily A member 1¬†	KCNA1	K_V	VGIC	No	Yes	Yes	Yes
P16389	Potassium voltage-gated channel subfamily A member 2	KCNA2	K_V	VGIC	No	Yes	Yes	Yes
P22001	Potassium voltage-gated channel subfamily A member 3	KCNA3 (HGK5)	K_V	VGIC	No	Yes	Yes	Yes
P22459	Potassium voltage-gated channel subfamily A member 4¬†	KCNA4 (KCNA4L)	K_V	VGIC	No	Yes	Yes	Yes
P22460	Potassium voltage-gated channel subfamily A member 5	KCNA5	K_V	VGIC	No	Yes	Yes	Yes
P17658	Potassium voltage-gated channel subfamily A member 6	KCNA6	K_V	VGIC	No	Yes	Yes	Yes
Q96RP8	Potassium voltage-gated channel subfamily A member 7	KCNA7	K_V	VGIC	No	Yes	Yes	Yes
Q16322	Potassium voltage-gated channel subfamily A member 10	KCNA10	K_V	VGIC	No	Yes	Yes	Yes
Q14721	Potassium voltage-gated channel subfamily B member 1	KCNB1	K_V	VGIC	No	Yes	Yes	Yes
Q92953	Potassium voltage-gated channel subfamily B member 2	KCNB2	K_V	VGIC	No	Yes	Yes	Yes
P48547	Potassium voltage-gated channel subfamily C member 1	KCNC1	K_V	VGIC	No	Yes	Yes	Yes
Q96PR1	Potassium voltage-gated channel subfamily C member 2	KCNC2	K_V	VGIC	No	Yes	Yes	Yes
Q14003	Potassium voltage-gated channel subfamily C member 3	KCNC3	K_V	VGIC	No	Yes	Yes	Yes
Q03721	Potassium voltage-gated channel subfamily C member 4	KCNC4 (C1orf30)	K_V	VGIC	No	Yes	Yes	Yes
Q9NSA2	Potassium voltage-gated channel subfamily D member 1	KCND1	K_V	VGIC	No	Yes	Yes	Yes
Q9NZV8	Potassium voltage-gated channel subfamily D member 2	KCND2 (KIAA1044)	K_V	VGIC	No	Yes	Yes	Yes
Q9UK17	Potassium voltage-gated channel subfamily D member 3	KCND3	K_V	VGIC	No	Yes	Yes	Yes
Q9H3M0	Potassium voltage-gated channel subfamily F member 1	KCNF1	K_V	VGIC	No	Yes	Yes	Yes
Q9UIX4	Potassium voltage-gated channel subfamily G member 1	KCNG1	K_V	VGIC	No	Yes	Yes	Yes
Q9UJ96	Potassium voltage-gated channel subfamily G member 2	KCNG2 (KCNF2)	K_V	VGIC	No	Yes	Yes	Yes
Q8TAE7	Potassium voltage-gated channel subfamily G member 3¬†	KCNG3	K_V	VGIC	No	Yes	Yes	Yes
Q8TDN1	Potassium voltage-gated channel subfamily G member 4	KCNG4 (KCNG3)	K_V	VGIC	No	Yes	Yes	Yes
O95259	Potassium voltage-gated channel subfamily H member 1	KCNH1 (EAG, EAG1)	K_V	VGIC	No	Yes	Yes	Yes
Q12809	Potassium voltage-gated channel subfamily H member 2	KCNH2 (ERG, ERG1, HERG)	K_V	VGIC	No	Yes	Yes	Yes
Q9ULD8	Potassium voltage-gated channel subfamily H member 3	KCNH3 (KIAA1282)	K_V	VGIC	No	Yes	Yes	Yes
Q9UQ05	Potassium voltage-gated channel subfamily H member 4	KCNH4	K_V	VGIC	No	Yes	Yes	Yes
Q8NCM2	Potassium voltage-gated channel subfamily H member 5	KCNH5 (EAG2)	K_V	VGIC	No	Yes	Yes	Yes
Q9H252	Potassium voltage-gated channel subfamily H member 6	KCNH6 (ERG2)	K_V	VGIC	No	Yes	Yes	Yes
Q9NS40	Potassium voltage-gated channel subfamily H member 7¬†	KCNH7 (ERG3)	K_V	VGIC	No	Yes	Yes	Yes
Q96L42	Potassium voltage-gated channel subfamily H member 8	KCNH8	K_V	VGIC	No	Yes	Yes	Yes
P51787	Potassium voltage-gated channel subfamily KQT member 1	KCNQ1 (KCNA8, KCNA9, KVLQT1)	K_V	VGIC	No	Yes	Yes	Yes
O43526	Potassium voltage-gated channel subfamily KQT member 2¬†	KCNQ2	K_V	VGIC	No	Yes	Yes	Yes
O43525	Potassium voltage-gated channel subfamily KQT member 3	KCNQ3	K_V	VGIC	No	Yes	Yes	Yes
P56696	Potassium voltage-gated channel subfamily KQT member 4	KCNQ4	K_V	VGIC	No	Yes	Yes	Yes
Q9NR82	Potassium voltage-gated channel subfamily KQT member 5	KCNQ5	K_V	VGIC	No	Yes	Yes	Yes
Q96KK3	Potassium voltage-gated channel subfamily S member 1	KCNS1	K_V	VGIC	No	Yes	Yes	Yes
Q9ULS6	Potassium voltage-gated channel subfamily S member 2	KCNS2 (KIAA1144)	K_V	VGIC	No	Yes	Yes	Yes
Q9BQ31	Potassium voltage-gated channel subfamily S member 3	KCNS3	K_V	VGIC	No	Yes	Yes	Yes
Q6PIU1	Potassium voltage-gated channel subfamily V member 1	KCNV1	K_V	VGIC	No	Yes	Yes	Yes
Q8TDN2	Potassium voltage-gated channel subfamily V member 2	KCNV2	K_V	VGIC	No	Yes	Yes	Yes
O00180	Potassium channel subfamily K member 1¬†	KCNK1 (HOHO1, KCNO1, TWIK1)	K_2P	VGIC	No	Yes	Yes	Yes
O95069	Potassium channel subfamily K member 2	KCNK2 (TREK, TREK1)	K_2P	VGIC	No	Yes	Yes	Yes
O14649	Potassium channel subfamily K member 3	KCNK3 (TASK, TASK1)	K_2P	VGIC	No	Yes	Yes	Yes
Q9NYG8	Potassium channel subfamily K member 4	KCNK4 (TRAAK)	K_2P	VGIC	No	Yes	Yes	Yes
O95279	Potassium channel subfamily K member 5	KCNK5 (TASK2)	K_2P	VGIC	No	Yes	Yes	Yes
Q9Y257	Potassium channel subfamily K member 6	KCNK6 (TOSS, TWIK2)	K_2P	VGIC	No	Yes	Yes	Yes
Q9Y2U2	Potassium channel subfamily K member 7	KCNK7	K_2P	VGIC	No	Yes	Yes	Yes
Q9NPC2	Potassium channel subfamily K member 9¬†	KCNK9 (TASK3)	K_2P	VGIC	No	Yes	Yes	Yes
P57789	Potassium channel subfamily K member 10	KCNK10 (TREK2)	K_2P	VGIC	No	Yes	Yes	Yes
Q9HB15	Potassium channel subfamily K member 12	KCNK12	K_2P	VGIC	No	Yes	Yes	Yes
Q9HB14	Potassium channel subfamily K member 13	KCNK13	K_2P	VGIC	No	Yes	Yes	Yes
Q9H427	Potassium channel subfamily K member 15	KCNK15 (TASK5)	K_2P	VGIC	No	Yes	Yes	Yes
Q96T55	Potassium channel subfamily K member 16	KCNK16 (TALK1)	K_2P	VGIC	No	Yes	Yes	Yes
Q96T54	Potassium channel subfamily K member 17	KCNK17 (TALK2, TASK4)	K_2P	VGIC	No	Yes	Yes	Yes
Q7Z418	Potassium channel subfamily K member 18	KCNK18 (TRESK, TRIK)	K_2P	VGIC	No	Yes	Yes	Yes
P48048	ATP-sensitive inward rectifier potassium channel 1¬†	KCNJ1 (ROMK1)	K_IR	VGIC	No	Yes	Yes	Yes
P63252	Inward rectifier potassium channel 2¬†	KCNJ2 (IRK1)	K_IR	VGIC	No	Yes	Yes	Yes
P48549	G protein-activated inward rectifier potassium channel 1¬†	KCNJ3 (GIRK1)	K_IR	VGIC	No	Yes	Yes	Yes
P48050	Inward rectifier potassium channel 4	KCNJ4 (IRK3)	K_IR	VGIC	No	Yes	Yes	Yes
P48544	G protein-activated inward rectifier potassium channel 4	KCNJ5 (GIRK4)	K_IR	VGIC	No	Yes	Yes	Yes
P48051	G protein-activated inward rectifier potassium channel 2	KCNJ6 (GIRK2, KATP2, KCNJ7)	K_IR	VGIC	No	Yes	Yes	Yes
Q15842	ATP-sensitive inward rectifier potassium channel 8	KCNJ8	K_IR	VGIC	No	Yes	Yes	Yes
Q92806	G protein-activated inward rectifier potassium channel 3	KCNJ9 (GIRK3)	K_IR	VGIC	No	Yes	Yes	Yes
P78508	ATP-sensitive inward rectifier potassium channel 10	KCNJ10	K_IR	VGIC	No	Yes	Yes	Yes
Q14654	ATP-sensitive inward rectifier potassium channel 11	KCNJ11	K_IR	VGIC	No	Yes	Yes	Yes
Q14500	ATP-sensitive inward rectifier potassium channel 12	KCNJ12 (IRK2, KCNJN1)	K_IR	VGIC	No	Yes	Yes	Yes
O60928	Inward rectifier potassium channel 13	KCNJ13	K_IR	VGIC	No	Yes	Yes	Yes
Q9UNX9	ATP-sensitive inward rectifier potassium channel 14¬†	KCNJ14 (IRK4)	K_IR	VGIC	No	Yes	Yes	Yes
Q99712	ATP-sensitive inward rectifier potassium channel 15	KCNJ15 (KCNJ14)	K_IR	VGIC	No	Yes	Yes	Yes
Q9NPI9	Inward rectifier potassium channel 16	KCNJ16	K_IR	VGIC	No	Yes	Yes	Yes
B7U540	Inward rectifier potassium channel 18	KCNJ18	K_IR	VGIC	No	Yes	No	Yes
Q5JUK3	Potassium channel subfamily T member 1¬†	KCNT1 (KIAA1422)	K_Ca.K_Na	VGIC	No	Yes	Yes	Yes
Q6UVM3	Potassium channel subfamily T member 2	KCNT2 (SLICK)	K_Ca.K_Na	VGIC	No	Yes	Yes	Yes
Q92952	Small conductance calcium-activated potassium channel protein 1	KCNN1 (SK)	K_Ca.K_Na	VGIC	No	Yes	Yes	Yes
Q9H2S1	Small conductance calcium-activated potassium channel protein 2	KCNN2	K_Ca.K_Na	VGIC	No	Yes	Yes	Yes
Q9UGI6	Small conductance calcium-activated potassium channel protein 3	KCNN3 (K3)	K_Ca.K_Na	VGIC	No	Yes	Yes	Yes
O15554	Intermediate conductance calcium-activated potassium channel protein 4	KCNN4 (IK1, IKCA1, KCA4, SK4)	K_Ca.K_Na	VGIC	No	Yes	Yes	Yes
A8MYU2	Potassium channel subfamily U member 1	KCNU1 (KCNMA3, KCNMC1, SLO3)	K_Ca.K_Na	VGIC	No	Yes	Yes	Yes
Q12791	Calcium-activated potassium channel subunit alpha-1¬†	KCNMA1 (KCNMA, SLO)	K_Ca.K_Na	VGIC	No	Yes	Yes	Yes
P15382	Potassium voltage-gated channel subfamily E member 1¬†	KCNE1	KCNE	VGIC	Yes	Yes	No	Yes
Q9Y6J6	Potassium voltage-gated channel subfamily E member 2¬†	KCNE2	KCNE	VGIC	Yes	Yes	No	Yes
Q9Y6H6	Potassium voltage-gated channel subfamily E member 3	KCNE3	KCNE	VGIC	Yes	Yes	No	Yes
Q8WWG9	Potassium voltage-gated channel subfamily E member 4	KCNE4	KCNE	VGIC	Yes	Yes	No	Yes
Q9UJ90	Potassium voltage-gated channel subfamily E regulatory beta subunit 5	KCNE5 (AMMECR2, KCNE1L)	KCNE	VGIC	Yes	Yes	No	No
Q9NZI2	Kv channel-interacting protein 1	KCNIP1 (KCHIP1, VABP)	KCNIP	VGIC	Yes	No	No	Yes
Q9NS61	Kv channel-interacting protein 2	KCNIP2 (KCHIP2)	KCNIP	VGIC	Yes	No	No	Yes
Q9Y2W7	Calsenilin	KCNIP3 (CSEN, DREAM, KCHIP3)	KCNIP	VGIC	Yes	No	No	Yes
Q6PIL6	Kv channel-interacting protein 4	KCNIP4 (CALP, KCHIP4)	KCNIP	VGIC	Yes	No	No	Yes
Q16558	Calcium-activated potassium channel subunit beta-1¬†	KCNMB1	KCNMB	VGIC	Yes	Yes	No	Yes
Q9Y691	Calcium-activated potassium channel subunit beta-2	KCNMB2	KCNMB	VGIC	Yes	Yes	No	Yes
Q9NPA1	Calcium-activated potassium channel subunit beta-3	KCNMB3 (KCNMB2, KCNMBL)	KCNMB	VGIC	Yes	Yes	No	Yes
Q86W47	Calcium-activated potassium channel subunit beta-4	KCNMB4	KCNMB	VGIC	Yes	Yes	No	Yes
Q14722	Voltage-gated potassium channel subunit beta-1¬†	KCNAB1 (KCNA1B)	KCNAB	VGIC	Yes	Yes	No	Yes
Q13303	Voltage-gated potassium channel subunit beta-2 ¬∑	KCNAB2 (KCNA2B, KCNK2)	KCNAB	VGIC	Yes	Yes	No	Yes
O43448	Voltage-gated potassium channel subunit beta-3 ¬∑	KCNAB3 (KCNA3B)	KCNAB	VGIC	Yes	Yes	No	Yes
P54289	Voltage-dependent calcium channel subunit alpha-2/delta-1	CACNA2D1 (CACNL2A, CCHL2A, MHS3)	CACN	VGIC	Yes	Yes	No	Yes
Q9NY47	Voltage-dependent calcium channel subunit alpha-2/delta-2	CACNA2D2 (KIAA0558)	CACN	VGIC	Yes	Yes	No	Yes
Q8IZS8	Voltage-dependent calcium channel subunit alpha-2/delta-3¬†	CACNA2D3	CACN	VGIC	Yes	Yes	No	Yes
Q7Z3S7	Voltage-dependent calcium channel subunit alpha-2/delta-4	CACNA2D4	CACN	VGIC	Yes	Yes	No	Yes
Q06432	Voltage-dependent calcium channel gamma-1 subunit¬†	CACNG1 (CACNLG)	CACN	VGIC	Yes	Yes	No	Yes
Q9Y698	Voltage-dependent calcium channel gamma-2 subunit	CACNG2	CACN	VGIC	Yes	Yes	No	Yes
O60359	Voltage-dependent calcium channel gamma-3 subunit¬†	CACNG3	CACN	VGIC	Yes	Yes	No	Yes
Q9UBN1	Voltage-dependent calcium channel gamma-4 subunit¬†	CACNG4	CACN	VGIC	Yes	Yes	No	Yes
Q9UF02	Voltage-dependent calcium channel gamma-5 subunit¬†	CACNG5	CACN	VGIC	Yes	Yes	No	Yes
Q9BXT2	Voltage-dependent calcium channel gamma-6 subunit	CACNG6	CACN	VGIC	Yes	Yes	No	Yes
P62955	Voltage-dependent calcium channel gamma-7 subunit	CACNG7	CACN	VGIC	Yes	Yes	No	Yes
Q8WXS5	Voltage-dependent calcium channel gamma-8 subunit	CACNG8 (CACNG6)	CACN	VGIC	Yes	Yes	No	Yes
Q5VT99	Leucine-rich repeat-containing protein 38	LRRC38	VGIC auxiliary	VGIC	Yes	No	No	Yes
Q6ZSA7	Leucine-rich repeat-containing protein 55	LRRC55	VGIC auxiliary	VGIC	Yes	No	No	Yes
Q401N2	Zinc-activated ligand-gated ion channel	ZACN (L2, LGICZ, LGICZ1, ZAC)	ZAC	LGIC	No	Yes	Yes	Yes
P46098	5-hydroxytryptamine receptor 3A	HTR3A (5HT3R, HTR3)	5-HT3 receptor	LGIC	No	Yes	Yes	Yes
O95264	5-hydroxytryptamine receptor 3B	HTR3B	5-HT3 receptor	LGIC	No	Yes	Yes	Yes
Q8WXA8	5-hydroxytryptamine receptor 3C	HTR3C	5-HT3 receptor	LGIC	No	Yes	Yes	Yes
Q70Z44	5-hydroxytryptamine receptor 3D¬†	HTR3D	5-HT3 receptor	LGIC	No	Yes	Yes	Yes
A5X5Y0	5-hydroxytryptamine receptor 3E	HTR3E	5-HT3 receptor	LGIC	No	Yes	Yes	Yes
P02708	Acetylcholine receptor subunit alpha	CHRNA1 (ACHRA, CHNRA)	nACh receptor	LGIC	No	Yes	Yes	Yes
Q15822	Neuronal acetylcholine receptor subunit alpha-2	CHRNA2	nACh receptor	LGIC	No	Yes	Yes	Yes
P32297	Neuronal acetylcholine receptor subunit alpha-3	CHRNA3 (NACHRA3)	nACh receptor	LGIC	No	Yes	Yes	Yes
P43681	Neuronal acetylcholine receptor subunit alpha-4	CHRNA4 (NACRA4)	nACh receptor	LGIC	No	Yes	Yes	Yes
P30532	Neuronal acetylcholine receptor subunit alpha-5¬†	CHRNA5 (NACHRA5)	nACh receptor	LGIC	No	Yes	Yes	Yes
Q15825	Neuronal acetylcholine receptor subunit alpha-6	CHRNA6	nACh receptor	LGIC	No	Yes	Yes	Yes
P36544	Neuronal acetylcholine receptor subunit alpha-7	CHRNA7 (NACHRA7)	nACh receptor	LGIC	No	Yes	Yes	Yes
Q9UGM1	Neuronal acetylcholine receptor subunit alpha-9	CHRNA9 (NACHRA9)	nACh receptor	LGIC	No	Yes	Yes	Yes
Q9GZZ6	Neuronal acetylcholine receptor subunit alpha-10	CHRNA10 (NACHRA10)	nACh receptor	LGIC	No	Yes	Yes	Yes
P11230	Acetylcholine receptor subunit beta	CHRNB1 (ACHRB, CHRNB)	nACh receptor	LGIC	No	Yes	Yes	Yes
P17787	Neuronal acetylcholine receptor subunit beta-2	CHRNB2	nACh receptor	LGIC	No	Yes	Yes	Yes
Q05901	Neuronal acetylcholine receptor subunit beta-3	CHRNB3	nACh receptor	LGIC	No	Yes	Yes	Yes
P30926	Neuronal acetylcholine receptor subunit beta-4¬†	CHRNB4	nACh receptor	LGIC	No	Yes	Yes	Yes
Q07001	Acetylcholine receptor subunit delta¬†	CHRND (ACHRD)	nACh receptor	LGIC	No	Yes	Yes	Yes
Q04844	Acetylcholine receptor subunit epsilon	CHRNE (ACHRE)	nACh receptor	LGIC	No	Yes	Yes	Yes
P07510	Acetylcholine receptor subunit gamma¬†	CHRNG (ACHRG)	nACh receptor	LGIC	No	Yes	Yes	Yes
P14867	Gamma-aminobutyric acid receptor subunit alpha-1	GABRA1	GABA_A receptor	LGIC	No	Yes	Yes	Yes
P47869	Gamma-aminobutyric acid receptor subunit alpha-2¬†	GABRA2	GABA_A receptor	LGIC	No	Yes	Yes	Yes
P34903	Gamma-aminobutyric acid receptor subunit alpha-3¬†	GABRA3	GABA_A receptor	LGIC	No	Yes	Yes	Yes
P48169	Gamma-aminobutyric acid receptor subunit alpha-4¬†	GABRA4	GABA_A receptor	LGIC	No	Yes	Yes	Yes
P31644	Gamma-aminobutyric acid receptor subunit alpha-5	GABRA5	GABA_A receptor	LGIC	No	Yes	Yes	Yes
Q16445	Gamma-aminobutyric acid receptor subunit alpha-6	GABRA6	GABA_A receptor	LGIC	No	Yes	Yes	Yes
P18505	Gamma-aminobutyric acid receptor subunit beta-1	GABRB1	GABA_A receptor	LGIC	No	Yes	Yes	Yes
P47870	Gamma-aminobutyric acid receptor subunit beta-2	GABRB2	GABA_A receptor	LGIC	No	Yes	Yes	Yes
P28472	Gamma-aminobutyric acid receptor subunit beta-3	GABRB3	GABA_A receptor	LGIC	No	Yes	Yes	Yes
O14764	Gamma-aminobutyric acid receptor subunit delta	GABRD	GABA_A receptor	LGIC	No	Yes	Yes	Yes
P78334	Gamma-aminobutyric acid receptor subunit epsilon	GABRE	GABA_A receptor	LGIC	No	Yes	Yes	Yes
Q8N1C3	Gamma-aminobutyric acid receptor subunit gamma-1¬†	GABRG1	GABA_A receptor	LGIC	No	Yes	Yes	Yes
P18507	Gamma-aminobutyric acid receptor subunit gamma-2	GABRG2	GABA_A receptor	LGIC	No	Yes	Yes	Yes
Q99928	Gamma-aminobutyric acid receptor subunit gamma-3	GABRG3	GABA_A receptor	LGIC	No	Yes	Yes	Yes
O00591	Gamma-aminobutyric acid receptor subunit pi	GABRP	GABA_A receptor	LGIC	No	Yes	Yes	Yes
Q9UN88	Gamma-aminobutyric acid receptor subunit theta	GABRQ	GABA_A receptor	LGIC	No	Yes	Yes	Yes
P24046	Gamma-aminobutyric acid receptor subunit rho-1	GABRR1	GABA_A receptor	LGIC	No	Yes	Yes	Yes
P28476	Gamma-aminobutyric acid receptor subunit rho-2¬†	GABRR2	GABA_A receptor	LGIC	No	Yes	Yes	Yes
A8MPY1	Gamma-aminobutyric acid receptor subunit rho-3	GABRR3	GABA_A receptor	LGIC	No	Yes	Yes	Yes
P23415	Glycine receptor subunit alpha-1	GLRA1	Glycine receptor	LGIC	No	Yes	Yes	Yes
P23416	Glycine receptor subunit alpha-2¬†	GLRA2	Glycine receptor	LGIC	No	Yes	Yes	Yes
O75311	Glycine receptor subunit alpha-3	GLRA3	Glycine receptor	LGIC	No	Yes	Yes	Yes
P48167	Glycine receptor subunit beta	GLRB	Glycine receptor	LGIC	No	Yes	Yes	Yes
P78348	Acid-sensing ion channel 1	ASIC1 (ACCN2, BNAC2)	ASICs	LGIC	No	Yes	Yes	Yes
Q16515	Acid-sensing ion channel 2	ASIC2 (ACCN, ACCN1, BNAC1, MDEG)	ASICs	LGIC	No	Yes	Yes	Yes
Q9UHC3	Acid-sensing ion channel 3¬†	ASIC3 (ACCN3, SLNAC1, TNAC1)	ASICs	LGIC	No	Yes	Yes	Yes
Q96FT7	Acid-sensing ion channel 4	ASIC4 (ACCN4)	ASICs	LGIC	No	Yes	No	Yes
Q9NY37	Acid-sensing ion channel 5	ASIC5 (ACCN5, HINAC)	ASICs	LGIC	No	Yes	No	Yes
P37088	Amiloride-sensitive sodium channel subunit alpha¬†	SCNN1A (SCNN1)	ENaC	LGIC	No	Yes	Yes	Yes
P51168	Amiloride-sensitive sodium channel subunit beta	SCNN1B	ENaC	LGIC	No	Yes	Yes	Yes
P51172	Amiloride-sensitive sodium channel subunit delta	SCNN1D (DNACH)	ENaC	LGIC	No	Yes	Yes	Yes
P51170	Amiloride-sensitive sodium channel subunit gamma	SCNN1G	ENaC	LGIC	No	Yes	Yes	Yes
P42261	Glutamate receptor 1¬†	GRIA1 (GLUH1, GLUR1)	Ionotropic glutamate receptor	LGIC	No	Yes	Yes	Yes
P42262	Glutamate receptor 2	GRIA2 (GLUR2)	Ionotropic glutamate receptor	LGIC	No	Yes	Yes	Yes
P42263	Glutamate receptor 3	GRIA3 (GLUR3, GLURC)	Ionotropic glutamate receptor	LGIC	No	Yes	Yes	Yes
P48058	Glutamate receptor 4	GRIA4 (GLUR4)	Ionotropic glutamate receptor	LGIC	No	Yes	Yes	Yes
Q9ULK0	Glutamate receptor ionotropic, delta-1¬†	GRID1 (KIAA1220)	Ionotropic glutamate receptor	LGIC	No	Yes	Yes	Yes
O43424	Glutamate receptor ionotropic, delta-2¬†	GRID2 (GLURD2)	Ionotropic glutamate receptor	LGIC	Yes	Yes	Yes	Yes
P39086	Glutamate receptor ionotropic, kainate 1¬†	GRIK1 (GLUR5)	Ionotropic glutamate receptor	LGIC	No	Yes	Yes	Yes
Q13002	Glutamate receptor ionotropic, kainate 2	GRIK2 (GLUR6)	Ionotropic glutamate receptor	LGIC	No	Yes	Yes	Yes
Q13003	Glutamate receptor ionotropic, kainate 3	GRIK3 (GLUR7)	Ionotropic glutamate receptor	LGIC	No	Yes	Yes	Yes
Q16099	Glutamate receptor ionotropic, kainate 4¬†	GRIK4 (GRIK)	Ionotropic glutamate receptor	LGIC	No	Yes	Yes	Yes
Q16478	Glutamate receptor ionotropic, kainate 5¬†	GRIK5 (GRIK2)	Ionotropic glutamate receptor	LGIC	No	Yes	Yes	Yes
Q05586	Glutamate receptor ionotropic, NMDA 1	GRIN1 (NMDAR1)	Ionotropic glutamate receptor	LGIC	No	Yes	Yes	Yes
Q12879	Glutamate receptor ionotropic, NMDA 2A	GRIN2A (NMDAR2A)	Ionotropic glutamate receptor	LGIC	No	Yes	Yes	Yes
Q13224	Glutamate receptor ionotropic, NMDA 2B¬†	GRIN2B (NMDAR2B)	Ionotropic glutamate receptor	LGIC	No	Yes	Yes	Yes
Q14957	Glutamate receptor ionotropic, NMDA 2C	GRIN2C (NMDAR2C)	Ionotropic glutamate receptor	LGIC	No	Yes	Yes	Yes
O15399	Glutamate receptor ionotropic, NMDA 2D	GRIN2D (GluN2D, NMDAR2D)	Ionotropic glutamate receptor	LGIC	No	Yes	Yes	Yes
Q8TCU5	Glutamate receptor ionotropic, NMDA 3A	GRIN3A (KIAA1973)	Ionotropic glutamate receptor	LGIC	No	Yes	Yes	Yes
O60391	Glutamate receptor ionotropic, NMDA 3B	GRIN3B	Ionotropic glutamate receptor	LGIC	No	Yes	Yes	Yes
Q14643	Inositol 1,4,5-trisphosphate receptor type 1¬†	ITPR1 (INSP3R1)	IP3 receptor	LGIC	No	Yes	Yes	Yes
Q14571	Inositol 1,4,5-trisphosphate receptor type 2	ITPR2	IP3 receptor	LGIC	No	Yes	Yes	Yes
Q14573	Inositol 1,4,5-trisphosphate receptor type 3	ITPR3	IP3 receptor	LGIC	No	Yes	Yes	Yes
P51575	P2X purinoceptor 1¬†	P2RX1 (P2X1)	P2X receptor	LGIC	No	Yes	Yes	Yes
Q9UBL9	P2X purinoceptor 2¬†	P2RX2 (P2X2)	P2X receptor	LGIC	No	Yes	Yes	Yes
P56373	P2X purinoceptor 3¬†	P2RX3	P2X receptor	LGIC	No	Yes	Yes	Yes
Q99571	P2X purinoceptor 4	P2RX4	P2X receptor	LGIC	No	Yes	Yes	Yes
Q93086	P2X purinoceptor 5	P2RX5 (P2X5)	P2X receptor	LGIC	No	Yes	Yes	Yes
O15547	P2X purinoceptor 6	P2RX6 (P2RXL1, P2X6)	P2X receptor	LGIC	No	Yes	Yes	Yes
Q99572	P2X purinoceptor 7	P2RX7	P2X receptor	LGIC	No	Yes	Yes	Yes
P35523	Chloride channel protein 1	CLCN1 (CLC1)	CLC	Chloride channels	No	Yes	Yes	Yes
P51788	Chloride channel protein 2	CLCN2 (ClC-2)	CLC	Chloride channels	No	Yes	Yes	Yes
P51790	H(+)/Cl(-) exchange transporter 3	CLCN3 (ClC-3)	CLC	Chloride channels	No	Yes	Yes	Yes
P51793	H(+)/Cl(-) exchange transporter 4	CLCN4	CLC	Chloride channels	No	Yes	Yes	Yes
P51795	H(+)/Cl(-) exchange transporter 5	CLCN5 (CLCK2) (ClC-5)	CLC	Chloride channels	No	Yes	Yes	Yes
P51797	H(+)/Cl(-) exchange transporter 6	CLCN6 (KIAA0046)	CLC	Chloride channels	No	Yes	Yes	Yes
P51798	H(+)/Cl(-) exchange transporter 7	CLCN7	CLC	Chloride channels	No	Yes	Yes	Yes
P51800	Chloride channel protein ClC-Ka	CLCNKA	CLC	Chloride channels	No	Yes	Yes	Yes
P51801	Chloride channel protein ClC-Kb	CLCNKB	CLC	Chloride channels	No	Yes	Yes	Yes
Q8WZ55	Barttin	BSND (BART)	CLC	Chloride channels	Yes	Yes	No	No
Q86WC4	Osteopetrosis-associated transmembrane protein 1	OSTM1 (GL)	CLC	Chloride channels	Yes	Yes	No	No
P13569	Cystic fibrosis transmembrane conductance regulator	CFTR (ABCC7)	CFTR	Chloride channels	No	No	Yes	Yes
Q5XXA6	Anoctamin-1	ANO1 (DOG1, ORAOV2, TAOS2, TMEM16A)	CaCC	Chloride channels	No	Yes	Yes	Yes
Q9NQ90	Anoctamin-2	ANO2 (C12orf3, TMEM16B)	CaCC	Chloride channels	No	Yes	No	Yes
Q9BYT9	Anoctamin-3	ANO3 (C11orf25, TMEM16C)	CaCC	Chloride channels	Yes	Yes	No	No
Q32M45	Anoctamin-4	ANO4 (TMEM16D)	CaCC	Chloride channels	No	Yes	No	No
Q75V66	Anoctamin-5	ANO5 (GDD1, TMEM16E)	CaCC	Chloride channels	No	Yes	No	No
Q4KMQ2	Anoctamin-6	ANO6 (TMEM16F)	CaCC	Chloride channels	No	Yes	No	Yes
Q6IWH7	Anoctamin-7	ANO7 (NGEP, PCANAP5, TMEM16G)	CaCC	Chloride channels	Yes	Yes	No	No
Q9HCE9	Anoctamin-8	ANO8 (KIAA1623, TMEM16H)	CaCC	Chloride channels	No	Yes	No	No
A1A5B4	Anoctamin-9	ANO9 (PIG5, TMEM16J, TP53I5)	CaCC	Chloride channels	No	Yes	No	No
Q9NW15	Anoctamin-10	ANO10 (TMEM16K)	CaCC	Chloride channels	No	Yes	No	No
A8K7I4	Calcium-activated chloride channel regulator 1	CLCA1 (CACC1)	CaCC	Chloride channels	Yes	Yes	No	Yes
Q9UQC9	Calcium-activated chloride channel regulator 2	CLCA2 (CACC3)	CaCC	Chloride channels	Yes	Yes	No	Yes
Q9Y6N3	Calcium-activated chloride channel regulator family member 3¬†	CLCA3 (CLCA3P)	CaCC	Chloride channels	Yes	No	No	Yes
Q14CN2	Calcium-activated chloride channel regulator 4	CLCA4 (CaCC2)	CaCC	Chloride channels	Yes	Yes	No	Yes
O76090	Bestrophin-1	BEST1 (VMD2)	CaCC	Chloride channels	No	No	No	Yes
Q8NFU1	Bestrophin-2	BEST2 (VMD2L1)	CaCC	Chloride channels	No	No	No	Yes
Q8N1M1	Bestrophin-3	BEST3 (VMD2L3)	CaCC	Chloride channels	No	No	No	Yes
Q8NFU0	Bestrophin-4	BEST4 (VMD2L2)	CaCC	Chloride channels	No	No	No	Yes
P21796	Voltage-dependent anion-selective channel protein 1	VDAC1 (VDAC)	VDAC	Chloride channels	No	Yes	No	No
P45880	Voltage-dependent anion-selective channel protein 2	VDAC2	VDAC	Chloride channels	No	Yes	No	No
Q9Y277	Voltage-dependent anion-selective channel protein 3	VDAC3	VDAC	Chloride channels	No	Yes	No	No
Q8IWT6	Volume-regulated anion channel subunit LRRC8A	LRRC8A (KIAA1437, LRRC8, SWELL1)	VRAC	Chloride channels	No	Yes	No	No
Q6P9F7	Volume-regulated anion channel subunit LRRC8B	LRRC8B (KIAA0231)	VRAC	Chloride channels	No	Yes	No	No
Q8TDW0	Volume-regulated anion channel subunit LRRC8C	LRRC8C (AD158, FAD158)	VRAC	Chloride channels	No	Yes	No	No
Q7L1W4	Volume-regulated anion channel subunit LRRC8D	LRRC8D (LRRC5)	VRAC	Chloride channels	No	Yes	No	No
Q6NSJ5	Volume-regulated anion channel subunit LRRC8E	LRRC8E	VRAC	Chloride channels	No	Yes	No	No
O00299	Chloride intracellular channel protein 1	CLIC1 (G6, NCC27)	CLIC	Chloride channels	No	Yes	No	Yes
O15247	Chloride intracellular channel protein 2	CLIC2	CLIC	Chloride channels	No	Yes	No	Yes
O95833	Chloride intracellular channel protein 3	CLIC3	CLIC	Chloride channels	No	Yes	No	Yes
Q9Y696	Chloride intracellular channel protein 4	CLIC4	CLIC	Chloride channels	No	Yes	No	Yes
Q9NZA1	Chloride intracellular channel protein 5	CLIC5	CLIC	Chloride channels	No	Yes	No	Yes
Q96NY7	Chloride intracellular channel protein 6	CLIC6 (CLIC1L)	CLIC	Chloride channels	No	Yes	No	Yes
Q9H813	Proton-activated chloride channel	PACC1	PACC	Chloride channels	No	No	No	No
Q96S66	Chloride channel CLIC-like protein 1	CLCC1 (KIAA0761, MCLC)	CLCC	Chloride channels	No	No	No	Yes
P30301	Lens fiber major intrinsic protein	MIP (AQP0)	Aquaporin	Other	No	No	Yes	No
P29972	Aquaporin-1	AQP1 (CHIP28)	Aquaporin	Other	No	No	Yes	No
P41181	Aquaporin-2	AQP2	Aquaporin	Other	No	No	Yes	No
Q92482	Aquaporin-3	AQP3	Aquaporin	Other	No	No	Yes	No
P55087	Aquaporin-4	AQP4	Aquaporin	Other	No	No	Yes	No
P55064	Aquaporin-5	AQP5	Aquaporin	Other	No	No	Yes	No
Q13520	Aquaporin-6	AQP6 (AQP2L)	Aquaporin	Other	No	No	Yes	No
O14520	Aquaporin-7	AQP7 (AQP7L, AQP9)	Aquaporin	Other	No	No	Yes	No
O94778	Aquaporin-8	AQP8	Aquaporin	Other	No	No	Yes	No
O43315	Aquaporin-9	AQP9 (SSC1)	Aquaporin	Other	No	No	Yes	No
Q96PS8	Aquaporin-10	AQP10	Aquaporin	Other	No	No	Yes	No
Q8NBQ7	Aquaporin-11	AQP11 (AQPX1)	Aquaporin	Other	No	No	Yes	No
Q8IXF9	Aquaporin-12A	AQP12A (AQP12, AQPX2)	Aquaporin	Other	No	No	No	No
A6NM10	Aquaporin-12B	AQP-12B	Aquaporin	Other	No	No	No	No
P17302	Gap junction alpha-1 protein	GJA1 (GJAL) (CX43)	Connexins	Other	No	No	Yes	No
Q9Y6H8	Gap junction alpha-3 protein	GJA3 (CX46)	Connexins	Other	No	No	Yes	No
P35212	Gap junction alpha-4 protein	GJA4 (CX37)	Connexins	Other	No	No	Yes	No
P36382	Gap junction alpha-5 protein	GJA5 (CX40)	Connexins	Other	No	No	Yes	No
P48165	Gap junction alpha-8 protein	GJA8 (CX50)	Connexins	Other	No	No	Yes	No
P57773	Gap junction alpha-9 protein	GJA9 (CX36)(GJA10) (Cx58) (Cx59)	Connexins	Other	No	No	Yes	No
Q969M2	Gap junction alpha-10 protein	GJA10 (CX62)	Connexins	Other	No	No	Yes	No
P08034	Gap junction beta-1 protein	GJB1 (CX32)	Connexins	Other	No	No	Yes	No
P29033	Gap junction beta-2 protein	GJB2 (CX26)	Connexins	Other	No	No	Yes	No
O75712	Gap junction beta-3 protein	GJB3 (CX31)	Connexins	Other	No	No	Yes	No
Q9NTQ9	Gap junction beta-4 protein	GJB4	Connexins	Other	No	No	Yes	No
O95377	Gap junction beta-5 protein	GJB5 (Cx31.1)	Connexins	Other	No	No	Yes	No
O95452	Gap junction beta-6 protein	GJB6 (CX30)	Connexins	Other	No	No	Yes	No
Q6PEY0	Gap junction beta-7 protein	GJB7 (CX25)	Connexins	Other	No	No	Yes	No
P36383	Gap junction gamma-1 protein	GJC1 (GJA7)(CX45)	Connexins	Other	No	No	Yes	No
Q5T442	Gap junction gamma-2 protein	GJC2 (GJA12) (Cx47) (Cx46.6)	Connexins	Other	No	No	Yes	No
Q8NFK1	Gap junction gamma-3 protein	GJC3 (GJE1)	Connexins	Other	No	No	Yes	No
Q9UKL4	Gap junction delta-2 protein	GJD2 (GJA9)	Connexins	Other	No	No	Yes	No
Q8N144	Gap junction delta-3 protein	GJD3 (GJA11, GJC1)	Connexins	Other	No	No	Yes	No
Q96KN9	Gap junction delta-4 protein	GJD4 (CX40.1)	Connexins	Other	No	No	Yes	No
A6NN92	Putative gap junction epsilon-1 protein	GJE1	Connexins	Other	No	No	Yes	No
Q96RD7	Pannexin-1	PANX1 (MRS1)	Pannexins	Other	No	No	Yes	Yes
Q96RD6	Pannexin-2	PANX2	Pannexins	Other	No	No	Yes	Yes
Q96QZ0	Pannexin-3	PANX3	Pannexins	Other	No	No	Yes	Yes
Q96D31	Calcium release-activated calcium channel protein 1	ORAI1 (CRACM1, TMEM142A)	Orai	Other	No	Yes	Yes	Yes
Q96SN7	Protein orai-2	ORAI2 (C7orf19, CBCIP2, TMEM142B)	Orai	Other	No	Yes	Yes	No
Q9BRQ5	Protein orai-3	ORAI3 (TMEM142C)	Orai	Other	No	Yes	Yes	No
Q92508	Piezo-type mechanosensitive ion channel component 1	PIEZO1 (FAM38A, KIAA0233)	Piezo	Other	No	Yes	Yes	Yes
Q9H5I5	Piezo-type mechanosensitive ion channel component 2	PIEZO2 (C18orf30, C18orf58, FAM38B)	Piezo	Other	No	Yes	Yes	Yes
Q8IU99	Calcium homeostasis modulator protein 1¬†	CALHM1 (FAM26C)	CAHM	Unclassified	No	No	No	Yes
Q9HA72	Calcium homeostasis modulator protein 2	CALHM2 (FAM26B)	CAHM	Unclassified	No	No	No	Yes
Q86XJ0	Calcium homeostasis modulator protein 3	CALHM3 (FAM26A)	CAHM	Unclassified	No	No	No	Yes
Q5JW98	Calcium homeostasis modulator protein 4	CALHM4 (C6orf78, FAM26D)	CAHM	Unclassified	No	No	No	Yes
Q8N5C1	Calcium homeostasis modulator protein 5	CALHM5 (C6orf188, FAM26E)	CAHM	Unclassified	No	No	No	Yes
Q5R3K3	Calcium homeostasis modulator protein 6¬†	CALHM6 (C6orf187, FAM26F)	CAHM	Unclassified	No	No	No	Yes
Q8TDI8	Transmembrane channel-like protein 1	TMC1	TMC	Unclassified	No	No	No	Yes
Q8TDI7	Transmembrane channel-like protein 2	TMC2 (C20orf145)	TMC	Unclassified	No	No	No	Yes
Q7Z5M5	Transmembrane channel-like protein 3	TMC3	TMC	Unclassified	No	No	No	Yes
Q7Z404	Transmembrane channel-like protein 4	TMC4	TMC	Unclassified	No	No	No	Yes
Q6UXY8	Transmembrane channel-like protein 5	TMC5	TMC	Unclassified	No	No	No	Yes
Q7Z403	Transmembrane channel-like protein 6	TMC6 (EVER1, EVIN1)	TMC	Unclassified	No	No	No	Yes
Q7Z402	Transmembrane channel-like protein 7	TMC7	TMC	Unclassified	No	No	No	Yes
Q8IU68	Transmembrane channel-like protein 8	TMC8 (EVER2, EVIN2)	TMC	Unclassified	No	No	No	Yes
Q7RTM1	Proton channel OTOP1	OTOP1	OTOP	Unclassified	No	No	No	No
Q7RTS6	Proton channel OTOP2	OTOP2	OTOP	Unclassified	No	No	No	No
Q7RTS5	Proton channel OTOP3	OTOP3	OTOP	Unclassified	No	No	No	No
Q9H6F2	Trimeric intracellular cation channel type A	TMEM38A	Unclassified	Unclassified	No	No	No	Yes
Q9NVV0	Trimeric intracellular cation channel type B	TMEM38B (C9orf87)	Unclassified	Unclassified	No	No	No	Yes
O94886	CSC1-like protein 1	TMEM63A (KIAA0489, KIAA0792)	Unclassified	Unclassified	No	No	No	Yes
Q5T3F8	CSC1-like protein 2	TMEM63B (C6orf110)	Unclassified	Unclassified	No	No	No	Yes
Q9P1W3	Calcium permeable stress-gated cation channel 1	TMEM63C (C14orf171, CSC1)	Unclassified	Unclassified	No	No	No	Yes
Q9BXS9	Solute carrier family 26 member 6	SLC26A6	Unclassified	Unclassified	No	No	No	Yes
Q7LBE3	Solute carrier family 26 member 9	SLC26A9	Unclassified	Unclassified	No	No	No	No
P04839	Cytochrome b-245 heavy chain	CYBB (NOX2)	Unclassified	Unclassified	No	No	No	Yes
Q15049	Membrane protein MLC1	MLC1 (KIAA0027, WKL1)	Unclassified	Unclassified	No	No	No	Yes
Q9H313	Protein tweety homolog 1	TTYH1	TTYH	Unclassified	No	No	No	Yes
Q9BSA4	Protein tweety homolog 2	TTYH2 (C17orf29)	TTYH	Unclassified	No	No	No	Yes
Q9C0H2	Protein tweety homolog 3	TTYH3 (KIAA1691)	TTYH	Auxiliary unclassified	Yes	No	No	Yes
Q99469	SH3 and cysteine-rich domain-containing protein	STAC (STAC1)	STAC	Auxiliary unclassified	Yes	No	No	No
Q6ZMT1	SH3 and cysteine-rich domain-containing protein 2	STAC2	STAC	Auxiliary unclassified	Yes	No	No	No
Q96MF2	SH3 and cysteine-rich domain-containing protein 3	STAC3	STAC	Auxiliary unclassified	Yes	No	No	No
Q13586	Stromal interaction molecule 1	STIM1 (GOK)	STIM	Auxiliary unclassified	Yes	No	No	No
Q9P246	Stromal interaction molecule 2	STIM2 (KIAA1482)	STIM	Auxiliary unclassified	Yes	No	No	No
Q6PI25	Protein cornichon homolog 2	CNIH2 (CNIL)	CNIH	Auxiliary unclassified	Yes	No	No	No
Q8TBE1	Protein cornichon homolog 3	CNIH3	CNIH	Auxiliary unclassified	Yes	No	No	No
Q9NZU7	Calcium-binding protein 1¬†	CABP1	CABP	Auxiliary unclassified	Yes	No	No	No
Q9NPB3	Calcium-binding protein 2	CABP2	CABP	Auxiliary unclassified	Yes	No	No	No
P57796	Calcium-binding protein 4	CABP4	CABP	Auxiliary unclassified	Yes	No	No	No
Q9NP86	Calcium-binding protein 5	CABP5 (CABP3)	CABP	Auxiliary unclassified	Yes	No	No	No
Q9P2D8	Protein unc-79 homolog	UNC79 (KIAA1409)	Auxiliary unclassified	Auxiliary unclassified	Yes	Yes	No	No
Q8N2C7	Protein unc-80 homolog	UNC80 (C2orf21, KIAA1843)	Auxiliary unclassified	Auxiliary unclassified	Yes	Yes	No	No
Q07699	Sodium channel subunit beta-1	SCN1B	Auxiliary unclassified	Auxiliary unclassified	Yes	Yes	No	Yes
O60939	Sodium channel subunit beta-2	SCN2B	Auxiliary unclassified	Auxiliary unclassified	Yes	Yes	No	Yes
Q9NY72	Sodium channel subunit beta-3	SCN3B (KIAA1158)	Auxiliary unclassified	Auxiliary unclassified	Yes	Yes	No	Yes
Q8IWT1	Sodium channel subunit beta-4	SCN4B	Auxiliary unclassified	Auxiliary unclassified	Yes	Yes	No	Yes
Q02641	Voltage-dependent L-type calcium channel subunit beta-1	CACNB1	Auxiliary unclassified	Auxiliary unclassified	Yes	Yes	No	Yes
Q08289	Voltage-dependent L-type calcium channel subunit beta-2	CACNB2 (CACNLB2, MYSB)	Auxiliary unclassified	Auxiliary unclassified	Yes	Yes	No	Yes
P54284	Voltage-dependent L-type calcium channel subunit beta-3	CACNB3 (CACNLB3)	Auxiliary unclassified	Auxiliary unclassified	Yes	Yes	No	Yes
O00305	Voltage-dependent L-type calcium channel subunit beta-4	CACNB4 (CACNLB4)	Auxiliary unclassified	Auxiliary unclassified	Yes	Yes	No	Yes
Q99946	Proline-rich transmembrane protein 1	PRRT1 (C6orf31, NG5)	Auxiliary unclassified	Auxiliary unclassified	Yes	No	No	No
Q7Z6L0	Proline-rich transmembrane protein 2 ¬∑	PRRT2	Auxiliary unclassified	Auxiliary unclassified	Yes	No	No	No
P42658	Dipeptidyl aminopeptidase-like protein 6	DPP6	Auxiliary unclassified	Auxiliary unclassified	Yes	No	No	No
Q8N608	Inactive dipeptidyl peptidase 10	DPP10 (DPRP3, KIAA1492)	Auxiliary unclassified	Auxiliary unclassified	Yes	No	No	No
Q2I0M4	Leucine-rich repeat-containing protein 26	LRRC26 (CAPC)	Auxiliary unclassified	Auxiliary unclassified	Yes	No	No	Yes
Q8N7C0	Leucine-rich repeat-containing protein 52	LRRC52	Auxiliary unclassified	Auxiliary unclassified	Yes	No	No	Yes
Q6ZSJ9	Protein shisa-6	SHISA6	Auxiliary unclassified	Auxiliary unclassified	Yes	No	No	No
B4DS77	Protein shisa-9	SHISA9	Auxiliary unclassified	Auxiliary unclassified	Yes	No	No	No
Q6UXU4	Germ cell-specific gene 1-like protein	GSG1L	Auxiliary unclassified	Auxiliary unclassified	Yes	No	No	No
Q8NE86	Calcium uniporter protein, mitochondrial	MCU (C10orf42, CCDC109A)	Auxiliary unclassified	Auxiliary unclassified	Yes	No	No	Yes
Q8WXS4	Voltage-dependent calcium channel gamma-like subunit	TMEM37 (PR)	Auxiliary unclassified	Auxiliary unclassified	Yes	No	No	Yes
Q9H7V2	Synapse differentiation-inducing gene protein 1	SYNDIG1	Auxiliary unclassified	Auxiliary unclassified	Yes	No	No	No

## Sheet: Table C
Table C: List of human IC orthologs detected across the Tree of Life
Human IC						Ortholog IC
UniProt ID	Symbol	Family	Group	Pore containing domain	Relationship type	Uniprot Proteome ID	Organism Tax ID	Kingdom	Taxonomic lineage	Species	Uniprot ID	Entry Name	Matched domain
Q5XXA6	ANO1 (DOG1, ORAOV2, TAOS2, TMEM16A)	CaCC	Chloride channels	dom1_586_986	Ortholog	UP000008143	8364	Eukaryota	Amphibians	Xenopus tropicalis	B3DLV2	B3DLV2_XENTR	dom1_581_958
Q5XXA6	ANO1 (DOG1, ORAOV2, TAOS2, TMEM16A)	CaCC	Chloride channels	dom1_586_986	Ortholog	UP000008820	7159	Eukaryota	Arthropods	Aedes aegypti	A0A6R5HEY3	A0A6R5HEY3_AEDAE	dom1_623_982
Q5XXA6	ANO1 (DOG1, ORAOV2, TAOS2, TMEM16A)	CaCC	Chloride channels	dom1_586_986	Ortholog	UP000005205	12957	Eukaryota	Arthropods	Atta cephalotes	A0A158NR82	A0A158NR82_ATTCE	dom1_573_927
Q5XXA6	ANO1 (DOG1, ORAOV2, TAOS2, TMEM16A)	CaCC	Chloride channels	dom1_586_986	Ortholog	UP000504616	27457	Eukaryota	Arthropods	Bactrocera dorsalis	A0A034VTW3	A0A034VTW3_BACDO	dom1_793_1150
Q5XXA6	ANO1 (DOG1, ORAOV2, TAOS2, TMEM16A)	CaCC	Chloride channels	dom1_586_986	Ortholog	UP000000311	104421	Eukaryota	Arthropods	Camponotus floridanus	E2A0E0	E2A0E0_CAMFO	dom1_579_931
Q5XXA6	ANO1 (DOG1, ORAOV2, TAOS2, TMEM16A)	CaCC	Chloride channels	dom1_586_986	Ortholog	UP000030742	77166	Eukaryota	Arthropods	Dendroctonus ponderosae	U4UV79	U4UV79_DENPD	dom1_450_787
Q5XXA6	ANO1 (DOG1, ORAOV2, TAOS2, TMEM16A)	CaCC	Chloride channels	dom1_586_986	Ortholog	UP000515200	30033	Eukaryota	Arthropods	Drosophila kikkawai	A0A6P4IV76	A0A6P4IV76_DROKI	dom1_631_988
Q5XXA6	ANO1 (DOG1, ORAOV2, TAOS2, TMEM16A)	CaCC	Chloride channels	dom1_586_986	Ortholog	UP000000803	7227	Eukaryota	Arthropods	Drosophila melanogaster	A0A0B4JCY1	A0A0B4JCY1_DROME	dom1_668_1025
Q5XXA6	ANO1 (DOG1, ORAOV2, TAOS2, TMEM16A)	CaCC	Chloride channels	dom1_586_986	Ortholog	UP000009192	7230	Eukaryota	Arthropods	Drosophila mojavensis	A0A0Q9WZK6	A0A0Q9WZK6_DROMO	dom1_677_1034
Q5XXA6	ANO1 (DOG1, ORAOV2, TAOS2, TMEM16A)	CaCC	Chloride channels	dom1_586_986	Ortholog	UP000295192	7232	Eukaryota	Arthropods	Drosophila navojoa	A0A484BL38	A0A484BL38_DRONA	dom1_672_984
Q5XXA6	ANO1 (DOG1, ORAOV2, TAOS2, TMEM16A)	CaCC	Chloride channels	dom1_586_986	Ortholog	UP000008744	7234	Eukaryota	Arthropods	Drosophila persimilis	B4GLX3	B4GLX3_DROPE	dom1_575_932
Q5XXA6	ANO1 (DOG1, ORAOV2, TAOS2, TMEM16A)	CaCC	Chloride channels	dom1_586_986	Ortholog	UP000001819	46245	Eukaryota	Arthropods	Drosophila pseudoobscura pseudoobscura	A0A6I8VCM7	A0A6I8VCM7_DROPS	dom1_666_1023
Q5XXA6	ANO1 (DOG1, ORAOV2, TAOS2, TMEM16A)	CaCC	Chloride channels	dom1_586_986	Ortholog	UP000001292	7238	Eukaryota	Arthropods	Drosophila sechellia	B4IHT7	B4IHT7_DROSE	dom1_624_981
Q5XXA6	ANO1 (DOG1, ORAOV2, TAOS2, TMEM16A)	CaCC	Chloride channels	dom1_586_986	Ortholog	UP000000304	7240	Eukaryota	Arthropods	Drosophila simulans	B4QTB8	B4QTB8_DROSI	dom1_644_1001
Q5XXA6	ANO1 (DOG1, ORAOV2, TAOS2, TMEM16A)	CaCC	Chloride channels	dom1_586_986	Ortholog	UP000007798	7260	Eukaryota	Arthropods	Drosophila willistoni	B4N8J7	B4N8J7_DROWI	dom1_671_1027
Q5XXA6	ANO1 (DOG1, ORAOV2, TAOS2, TMEM16A)	CaCC	Chloride channels	dom1_586_986	Ortholog	UP000198287	158441	Eukaryota	Arthropods	Folsomia candida	A0A226E445	A0A226E445_FOLCA	dom1_664_1018
Q5XXA6	ANO1 (DOG1, ORAOV2, TAOS2, TMEM16A)	CaCC	Chloride channels	dom1_586_986	Ortholog	UP000008237	610380	Eukaryota	Arthropods	Harpegnathos saltator	E2BRL6	E2BRL6_HARSA	dom1_382_786
Q5XXA6	ANO1 (DOG1, ORAOV2, TAOS2, TMEM16A)	CaCC	Chloride channels	dom1_586_986	Ortholog	UP000037069	7375	Eukaryota	Arthropods	Lucilia cuprina	A0A0L0CJY0	A0A0L0CJY0_LUCCU	dom1_784_1141
Q5XXA6	ANO1 (DOG1, ORAOV2, TAOS2, TMEM16A)	CaCC	Chloride channels	dom1_586_986	Ortholog	UP000002358	7425	Eukaryota	Arthropods	Nasonia vitripennis	A0A7M7HG95	A0A7M7HG95_NASVI	dom1_560_937
Q5XXA6	ANO1 (DOG1, ORAOV2, TAOS2, TMEM16A)	CaCC	Chloride channels	dom1_586_986	Ortholog	UP000054359	407821	Eukaryota	Arthropods	Stegodyphus mimosarum	A0A087UTC1	A0A087UTC1_STEMI	dom1_597_977
Q5XXA6	ANO1 (DOG1, ORAOV2, TAOS2, TMEM16A)	CaCC	Chloride channels	dom1_586_986	Ortholog	UP000014500	126957	Eukaryota	Arthropods	Strigamia maritima	T1JP88	T1JP88_STRMM	dom1_567_917
Q5XXA6	ANO1 (DOG1, ORAOV2, TAOS2, TMEM16A)	CaCC	Chloride channels	dom1_586_986	Ortholog	UP000007266	7070	Eukaryota	Arthropods	Tribolium castaneum	A0A139WH80	A0A139WH80_TRICA	dom1_648_1000
Q5XXA6	ANO1 (DOG1, ORAOV2, TAOS2, TMEM16A)	CaCC	Chloride channels	dom1_586_986	Ortholog	UP000594260	109461	Eukaryota	Arthropods	Varroa destructor	A0A7M7JG58	A0A7M7JG58_VARDE	dom1_539_909
Q5XXA6	ANO1 (DOG1, ORAOV2, TAOS2, TMEM16A)	CaCC	Chloride channels	dom1_586_986	Ortholog	UP000296049	8839	Eukaryota	Birds	Anas platyrhynchos	R0LFA4	R0LFA4_ANAPL	dom1_554_933
Q5XXA6	ANO1 (DOG1, ORAOV2, TAOS2, TMEM16A)	CaCC	Chloride channels	dom1_586_986	Ortholog	UP000016666	8840	Eukaryota	Birds	Anas platyrhynchos platyrhynchos	U3I9U5	U3I9U5_ANAPP	dom1_605_984
Q5XXA6	ANO1 (DOG1, ORAOV2, TAOS2, TMEM16A)	CaCC	Chloride channels	dom1_586_986	Ortholog	UP000472269	194338	Eukaryota	Birds	Athene cunicularia	A0A663MF82	A0A663MF82_ATHCN	dom1_581_975
Q5XXA6	ANO1 (DOG1, ORAOV2, TAOS2, TMEM16A)	CaCC	Chloride channels	dom1_586_986	Ortholog	UP000276834	44316	Eukaryota	Birds	Chloebia gouldiae	A0A3L8T085	A0A3L8T085_CHLGU	dom1_613_987
Q5XXA6	ANO1 (DOG1, ORAOV2, TAOS2, TMEM16A)	CaCC	Chloride channels	dom1_586_986	Ortholog	UP000603793	1196302	Eukaryota	Birds	Corvus moneduloides	A0A851WQC1	A0A851WQC1_CORMO	dom1_554_946
Q5XXA6	ANO1 (DOG1, ORAOV2, TAOS2, TMEM16A)	CaCC	Chloride channels	dom1_586_986	Ortholog	UP000694562	100819	Eukaryota	Birds	Falco tinnunculus	A0A8C4UR91	A0A8C4UR91_FALTI	dom1_623_1017
Q5XXA6	ANO1 (DOG1, ORAOV2, TAOS2, TMEM16A)	CaCC	Chloride channels	dom1_586_986	Ortholog	UP000016665	59894	Eukaryota	Birds	Ficedula albicollis	A0A803VW45	A0A803VW45_FICAL	dom1_606_1000
Q5XXA6	ANO1 (DOG1, ORAOV2, TAOS2, TMEM16A)	CaCC	Chloride channels	dom1_586_986	Ortholog	UP000000539	9031	Eukaryota	Birds	Gallus gallus	A0A8V1A870	A0A8V1A870_CHICK	dom1_622_1001
Q5XXA6	ANO1 (DOG1, ORAOV2, TAOS2, TMEM16A)	CaCC	Chloride channels	dom1_586_986	Ortholog	UP000694408	40217	Eukaryota	Birds	Junco hyemalis	A0A8C5ILM3	A0A8C5ILM3_JUNHY	dom1_605_1003
Q5XXA6	ANO1 (DOG1, ORAOV2, TAOS2, TMEM16A)	CaCC	Chloride channels	dom1_586_986	Ortholog	UP000001645	9103	Eukaryota	Birds	Meleagris gallopavo	A0A803XLL9	A0A803XLL9_MELGA	dom1_625_987
Q5XXA6	ANO1 (DOG1, ORAOV2, TAOS2, TMEM16A)	CaCC	Chloride channels	dom1_586_986	Ortholog	UP000694405	13146	Eukaryota	Birds	Melopsittacus undulatus	A0A8C6IW59	A0A8C6IW59_MELUD	dom1_579_973
Q5XXA6	ANO1 (DOG1, ORAOV2, TAOS2, TMEM16A)	CaCC	Chloride channels	dom1_586_986	Ortholog	UP000472261	9054	Eukaryota	Birds	Phasianus colchicus	A0A669PFH6	A0A669PFH6_PHACC	dom1_622_1000
Q5XXA6	ANO1 (DOG1, ORAOV2, TAOS2, TMEM16A)	CaCC	Chloride channels	dom1_586_986	Ortholog	UP000694409	9135	Eukaryota	Birds	Serinus canaria	A0A8C9N0E5	A0A8C9N0E5_SERCA	dom1_580_974
Q5XXA6	ANO1 (DOG1, ORAOV2, TAOS2, TMEM16A)	CaCC	Chloride channels	dom1_586_986	Ortholog	UP000472266	2489341	Eukaryota	Birds	Strigops habroptila	A0A672UUW8	A0A672UUW8_STRHB	dom1_606_1000
Q5XXA6	ANO1 (DOG1, ORAOV2, TAOS2, TMEM16A)	CaCC	Chloride channels	dom1_586_986	Ortholog	UP000007754	59729	Eukaryota	Birds	Taeniopygia guttata	H0Z4V6	H0Z4V6_TAEGU	dom1_623_1017
Q5XXA6	ANO1 (DOG1, ORAOV2, TAOS2, TMEM16A)	CaCC	Chloride channels	dom1_586_986	Ortholog	UP000257160	80972	Eukaryota	Fishes	Amphiprion ocellaris	A0A3Q1CX25	A0A3Q1CX25_AMPOC	dom1_258_613
Q5XXA6	ANO1 (DOG1, ORAOV2, TAOS2, TMEM16A)	CaCC	Chloride channels	dom1_586_986	Ortholog	UP000265080	161767	Eukaryota	Fishes	Amphiprion percula	A0A3P8U536	A0A3P8U536_AMPPE	dom1_303_666
Q5XXA6	ANO1 (DOG1, ORAOV2, TAOS2, TMEM16A)	CaCC	Chloride channels	dom1_586_986	Ortholog	UP000265040	64144	Eukaryota	Fishes	Anabas testudineus	A0A7N6FCT5	A0A7N6FCT5_ANATE	dom1_575_935
Q5XXA6	ANO1 (DOG1, ORAOV2, TAOS2, TMEM16A)	CaCC	Chloride channels	dom1_586_986	Ortholog	UP000314986	7868	Eukaryota	Fishes	Callorhinchus milii	A0A4W3KAR0	A0A4W3KAR0_CALMI	dom1_618_987
Q5XXA6	ANO1 (DOG1, ORAOV2, TAOS2, TMEM16A)	CaCC	Chloride channels	dom1_586_986	Ortholog	UP000265120	244447	Eukaryota	Fishes	Cynoglossus semilaevis	A0A3P8US90	A0A3P8US90_CYNSE	dom1_616_975
Q5XXA6	ANO1 (DOG1, ORAOV2, TAOS2, TMEM16A)	CaCC	Chloride channels	dom1_586_986	Ortholog	UP000472264	173247	Eukaryota	Fishes	Echeneis naucrates	A0A665WJL8	A0A665WJL8_ECHNA	dom1_480_865
Q5XXA6	ANO1 (DOG1, ORAOV2, TAOS2, TMEM16A)	CaCC	Chloride channels	dom1_586_986	Ortholog	UP000314983	8005	Eukaryota	Fishes	Electrophorus electricus	A0A4W4GZY0	A0A4W4GZY0_ELEEL	dom1_310_697
Q5XXA6	ANO1 (DOG1, ORAOV2, TAOS2, TMEM16A)	CaCC	Chloride channels	dom1_586_986	Ortholog	UP000694388	7764	Eukaryota	Fishes	Eptatretus burgeri	A0A8C4Q9W9	A0A8C4Q9W9_EPTBU	dom1_638_862
Q5XXA6	ANO1 (DOG1, ORAOV2, TAOS2, TMEM16A)	CaCC	Chloride channels	dom1_586_986	Ortholog	UP000694546	8049	Eukaryota	Fishes	Gadus morhua	A0A8C5D0A9	A0A8C5D0A9_GADMO	dom1_600_992
Q5XXA6	ANO1 (DOG1, ORAOV2, TAOS2, TMEM16A)	CaCC	Chloride channels	dom1_586_986	Ortholog	UP000250572	33528	Eukaryota	Fishes	Gambusia affinis	A0A315VAK0	A0A315VAK0_GAMAF	dom1_549_908
Q5XXA6	ANO1 (DOG1, ORAOV2, TAOS2, TMEM16A)	CaCC	Chloride channels	dom1_586_986	Ortholog	UP000007635	69293	Eukaryota	Fishes	Gasterosteus aculeatus	G3NCR8	G3NCR8_GASAC	dom1_589_948
Q5XXA6	ANO1 (DOG1, ORAOV2, TAOS2, TMEM16A)	CaCC	Chloride channels	dom1_586_986	Ortholog	UP000264800	37003	Eukaryota	Fishes	Kryptolebias marmoratus	A0A3Q3AL04	A0A3Q3AL04_KRYMA	dom1_595_968
Q5XXA6	ANO1 (DOG1, ORAOV2, TAOS2, TMEM16A)	CaCC	Chloride channels	dom1_586_986	Ortholog	UP000008672	7897	Eukaryota	Fishes	Latimeria chalumnae	H3AL09	H3AL09_LATCH	dom1_595_992
Q5XXA6	ANO1 (DOG1, ORAOV2, TAOS2, TMEM16A)	CaCC	Chloride channels	dom1_586_986	Ortholog	UP000018468	7918	Eukaryota	Fishes	Lepisosteus oculatus	W5MCV4	W5MCV4_LEPOC	dom1_624_1015
Q5XXA6	ANO1 (DOG1, ORAOV2, TAOS2, TMEM16A)	CaCC	Chloride channels	dom1_586_986	Ortholog	UP000261620	94237	Eukaryota	Fishes	Mola mola	A0A3Q3XG75	A0A3Q3XG75_MOLML	dom1_284_670
Q5XXA6	ANO1 (DOG1, ORAOV2, TAOS2, TMEM16A)	CaCC	Chloride channels	dom1_586_986	Ortholog	UP000261580	32507	Eukaryota	Fishes	Neolamprologus brichardi	A0A3Q4H5I6	A0A3Q4H5I6_NEOBR	dom1_298_675
Q5XXA6	ANO1 (DOG1, ORAOV2, TAOS2, TMEM16A)	CaCC	Chloride channels	dom1_586_986	Ortholog	UP000283210	123683	Eukaryota	Fishes	Oryzias javanicus	A0A437D8Q3	A0A437D8Q3_ORYJA	dom1_569_952
Q5XXA6	ANO1 (DOG1, ORAOV2, TAOS2, TMEM16A)	CaCC	Chloride channels	dom1_586_986	Ortholog	UP000646548	30732	Eukaryota	Fishes	Oryzias melastigma	A0A834FMV9	A0A834FMV9_ORYME	dom1_567_950
Q5XXA6	ANO1 (DOG1, ORAOV2, TAOS2, TMEM16A)	CaCC	Chloride channels	dom1_586_986	Ortholog	UP000245300	7757	Eukaryota	Fishes	Petromyzon marinus	S4R5B8	S4R5B8_PETMA	dom1_517_791
Q5XXA6	ANO1 (DOG1, ORAOV2, TAOS2, TMEM16A)	CaCC	Chloride channels	dom1_586_986	Ortholog	UP000242638	8081	Eukaryota	Fishes	Poecilia reticulata	A0A3P9NLU4	A0A3P9NLU4_POERE	dom1_553_912
Q5XXA6	ANO1 (DOG1, ORAOV2, TAOS2, TMEM16A)	CaCC	Chloride channels	dom1_586_986	Ortholog	UP000087266	8030	Eukaryota	Fishes	Salmo salar	A0A1S3MKA6	A0A1S3MKA6_SALSA	dom1_592_982
Q5XXA6	ANO1 (DOG1, ORAOV2, TAOS2, TMEM16A)	CaCC	Chloride channels	dom1_586_986	Ortholog	UP000472277	8032	Eukaryota	Fishes	Salmo trutta	A0A674BK42	A0A674BK42_SALTR	dom1_592_966
Q5XXA6	ANO1 (DOG1, ORAOV2, TAOS2, TMEM16A)	CaCC	Chloride channels	dom1_586_986	Ortholog	UP000246464	52904	Eukaryota	Fishes	Scophthalmus maximus	A0A2U9BEN4	A0A2U9BEN4_SCOMX	dom1_553_935
Q5XXA6	ANO1 (DOG1, ORAOV2, TAOS2, TMEM16A)	CaCC	Chloride channels	dom1_586_986	Ortholog	UP000472265	8175	Eukaryota	Fishes	Sparus aurata	A0A671XKV8	A0A671XKV8_SPAAU	dom1_632_992
Q5XXA6	ANO1 (DOG1, ORAOV2, TAOS2, TMEM16A)	CaCC	Chloride channels	dom1_586_986	Ortholog	UP000008912	9646	Eukaryota	Mammals	Ailuropoda melanoleuca	A0A7N5JRI7	A0A7N5JRI7_AILME	dom1_648_1037
Q5XXA6	ANO1 (DOG1, ORAOV2, TAOS2, TMEM16A)	CaCC	Chloride channels	dom1_586_986	Ortholog	UP000233020	37293	Eukaryota	Mammals	Aotus nancymaae	A0A2K5F260	A0A2K5F260_AOTNA	dom1_651_1051
Q5XXA6	ANO1 (DOG1, ORAOV2, TAOS2, TMEM16A)	CaCC	Chloride channels	dom1_586_986	Ortholog	UP000694857	9771	Eukaryota	Mammals	Balaenoptera musculus	A0A8B8YGC1	A0A8B8YGC1_BALMU	dom1_608_984
Q5XXA6	ANO1 (DOG1, ORAOV2, TAOS2, TMEM16A)	CaCC	Chloride channels	dom1_586_986	Ortholog	UP000314981	30522	Eukaryota	Mammals	Bos indicus x Bos taurus	A0A4W2DRK2	A0A4W2DRK2_BOBOX	dom1_658_1035
Q5XXA6	ANO1 (DOG1, ORAOV2, TAOS2, TMEM16A)	CaCC	Chloride channels	dom1_586_986	Ortholog	UP000009136	9913	Eukaryota	Mammals	Bos taurus	A0A3Q1MCG6	A0A3Q1MCG6_BOVIN	dom1_641_1018
Q5XXA6	ANO1 (DOG1, ORAOV2, TAOS2, TMEM16A)	CaCC	Chloride channels	dom1_586_986	Ortholog	UP000008225	9483	Eukaryota	Mammals	Callithrix jacchus	A0A8I3X443	A0A8I3X443_CALJA	dom1_649_1050
Q5XXA6	ANO1 (DOG1, ORAOV2, TAOS2, TMEM16A)	CaCC	Chloride channels	dom1_586_986	Ortholog	UP000002254	9615	Eukaryota	Mammals	Canis lupus familiaris	A0A8I3NYL1	A0A8I3NYL1_CANLF	dom1_649_1038
Q5XXA6	ANO1 (DOG1, ORAOV2, TAOS2, TMEM16A)	CaCC	Chloride channels	dom1_586_986	Ortholog	UP000291000	9925	Eukaryota	Mammals	Capra hircus	A0A452G160	A0A452G160_CAPHI	dom1_649_1026
Q5XXA6	ANO1 (DOG1, ORAOV2, TAOS2, TMEM16A)	CaCC	Chloride channels	dom1_586_986	Ortholog	UP000189704	1868482	Eukaryota	Mammals	Carlito syrichta	A0A3Q0E440	A0A3Q0E440_CARSF	dom1_698_1064
Q5XXA6	ANO1 (DOG1, ORAOV2, TAOS2, TMEM16A)	CaCC	Chloride channels	dom1_586_986	Ortholog	UP000005447	10141	Eukaryota	Mammals	Cavia porcellus	A0A286XR74	A0A286XR74_CAVPO	dom1_610_1011
Q5XXA6	ANO1 (DOG1, ORAOV2, TAOS2, TMEM16A)	CaCC	Chloride channels	dom1_586_986	Ortholog	UP000233040	2715852	Eukaryota	Mammals	Cebus imitator	A0A2K5PV40	A0A2K5PV40_CEBIM	dom1_561_961
Q5XXA6	ANO1 (DOG1, ORAOV2, TAOS2, TMEM16A)	CaCC	Chloride channels	dom1_586_986	Ortholog	UP000233060	9531	Eukaryota	Mammals	Cercocebus atys	A0A2K5LE66	A0A2K5LE66_CERAT	dom1_657_1057
Q5XXA6	ANO1 (DOG1, ORAOV2, TAOS2, TMEM16A)	CaCC	Chloride channels	dom1_586_986	Ortholog	UP000694398	34839	Eukaryota	Mammals	Chinchilla lanigera	A0A8C2W2D6	A0A8C2W2D6_CHILA	dom1_649_1049
Q5XXA6	ANO1 (DOG1, ORAOV2, TAOS2, TMEM16A)	CaCC	Chloride channels	dom1_586_986	Ortholog	UP000029965	60711	Eukaryota	Mammals	Chlorocebus sabaeus	A0A0D9RAE0	A0A0D9RAE0_CHLSB	dom1_492_892
Q5XXA6	ANO1 (DOG1, ORAOV2, TAOS2, TMEM16A)	CaCC	Chloride channels	dom1_586_986	Ortholog	UP000233080	336983	Eukaryota	Mammals	Colobus angolensis palliatus	A0A2K5HYH2	A0A2K5HYH2_COLAP	dom1_550_950
Q5XXA6	ANO1 (DOG1, ORAOV2, TAOS2, TMEM16A)	CaCC	Chloride channels	dom1_586_986	Ortholog	UP000081671	10020	Eukaryota	Mammals	Dipodomys ordii	A0A1S3FJW5	A0A1S3FJW5_DIPOR	dom1_622_1017
Q5XXA6	ANO1 (DOG1, ORAOV2, TAOS2, TMEM16A)	CaCC	Chloride channels	dom1_586_986	Ortholog	UP000079721	9365	Eukaryota	Mammals	Erinaceus europaeus	A0A1S3W5M2	A0A1S3W5M2_ERIEU	dom1_584_940
Q5XXA6	ANO1 (DOG1, ORAOV2, TAOS2, TMEM16A)	CaCC	Chloride channels	dom1_586_986	Ortholog	UP000011712	9685	Eukaryota	Mammals	Felis catus	A0A337S8E7	A0A337S8E7_FELCA	dom1_637_1026
Q5XXA6	ANO1 (DOG1, ORAOV2, TAOS2, TMEM16A)	CaCC	Chloride channels	dom1_586_986	Ortholog	UP000028990	885580	Eukaryota	Mammals	Fukomys damarensis	A0A091DDH4	A0A091DDH4_FUKDA	dom1_440_841
Q5XXA6	ANO1 (DOG1, ORAOV2, TAOS2, TMEM16A)	CaCC	Chloride channels	dom1_586_986	Ortholog	UP000001519	9595	Eukaryota	Mammals	Gorilla gorilla gorilla	G3S0E2	G3S0E2_GORGO	dom1_586_986
Q5XXA6	ANO1 (DOG1, ORAOV2, TAOS2, TMEM16A)	CaCC	Chloride channels	dom1_586_986	Ortholog	UP000005215	43179	Eukaryota	Mammals	Ictidomys tridecemlineatus	A0A287CSI3	A0A287CSI3_ICTTR	dom1_599_977
Q5XXA6	ANO1 (DOG1, ORAOV2, TAOS2, TMEM16A)	CaCC	Chloride channels	dom1_586_986	Ortholog	UP000694385	51337	Eukaryota	Mammals	Jaculus jaculus	A0A8C5P439	A0A8C5P439_JACJA	dom1_556_956
Q5XXA6	ANO1 (DOG1, ORAOV2, TAOS2, TMEM16A)	CaCC	Chloride channels	dom1_586_986	Ortholog	UP000007646	9785	Eukaryota	Mammals	Loxodonta africana	G3UBY0	G3UBY0_LOXAF	dom1_586_979
Q5XXA6	ANO1 (DOG1, ORAOV2, TAOS2, TMEM16A)	CaCC	Chloride channels	dom1_586_986	Ortholog	UP000233100	9541	Eukaryota	Mammals	Macaca fascicularis	A0A2K5UB97	A0A2K5UB97_MACFA	dom1_646_1046
Q5XXA6	ANO1 (DOG1, ORAOV2, TAOS2, TMEM16A)	CaCC	Chloride channels	dom1_586_986	Ortholog	UP000006718	9544	Eukaryota	Mammals	Macaca mulatta	A0A5F8AU24	A0A5F8AU24_MACMU	dom1_649_1049
Q5XXA6	ANO1 (DOG1, ORAOV2, TAOS2, TMEM16A)	CaCC	Chloride channels	dom1_586_986	Ortholog	UP000233120	9545	Eukaryota	Mammals	Macaca nemestrina	A0A2K6APC1	A0A2K6APC1_MACNE	dom1_586_986
Q5XXA6	ANO1 (DOG1, ORAOV2, TAOS2, TMEM16A)	CaCC	Chloride channels	dom1_586_986	Ortholog	UP000233140	9568	Eukaryota	Mammals	Mandrillus leucophaeus	A0A2K5XZW2	A0A2K5XZW2_MANLE	dom1_550_950
Q5XXA6	ANO1 (DOG1, ORAOV2, TAOS2, TMEM16A)	CaCC	Chloride channels	dom1_586_986	Ortholog	UP000694394	30608	Eukaryota	Mammals	Microcebus murinus	A0A8B7FV32	A0A8B7FV32_MICMU	dom1_638_1038
Q5XXA6	ANO1 (DOG1, ORAOV2, TAOS2, TMEM16A)	CaCC	Chloride channels	dom1_586_986	Ortholog	UP000000589	10090	Eukaryota	Mammals	Mus musculus	Q8BHY3	ANO1_MOUSE	dom1_560_960
Q5XXA6	ANO1 (DOG1, ORAOV2, TAOS2, TMEM16A)	CaCC	Chloride channels	dom1_586_986	Ortholog	UP000000715	9669	Eukaryota	Mammals	Mustela putorius furo	A0A8U0RBX2	A0A8U0RBX2_MUSPF	dom1_641_1030
Q5XXA6	ANO1 (DOG1, ORAOV2, TAOS2, TMEM16A)	CaCC	Chloride channels	dom1_586_986	Ortholog	UP000694381	1026970	Eukaryota	Mammals	Nannospalax galili	A0A8C6S1Y2	A0A8C6S1Y2_NANGA	dom1_556_956
Q5XXA6	ANO1 (DOG1, ORAOV2, TAOS2, TMEM16A)	CaCC	Chloride channels	dom1_586_986	Ortholog	UP000001073	61853	Eukaryota	Mammals	Nomascus leucogenys	A0A2I3HEY3	A0A2I3HEY3_NOMLE	dom1_558_912
Q5XXA6	ANO1 (DOG1, ORAOV2, TAOS2, TMEM16A)	CaCC	Chloride channels	dom1_586_986	Ortholog	UP000515203	10160	Eukaryota	Mammals	Octodon degus	A0A6P6E2E7	A0A6P6E2E7_OCTDE	dom1_649_1050
Q5XXA6	ANO1 (DOG1, ORAOV2, TAOS2, TMEM16A)	CaCC	Chloride channels	dom1_586_986	Ortholog	UP000002279	9258	Eukaryota	Mammals	Ornithorhynchus anatinus	A0A6I8P0Q9	A0A6I8P0Q9_ORNAN	dom1_651_1030
Q5XXA6	ANO1 (DOG1, ORAOV2, TAOS2, TMEM16A)	CaCC	Chloride channels	dom1_586_986	Ortholog	UP000005225	30611	Eukaryota	Mammals	Otolemur garnettii	H0XF50	H0XF50_OTOGA	dom1_560_960
Q5XXA6	ANO1 (DOG1, ORAOV2, TAOS2, TMEM16A)	CaCC	Chloride channels	dom1_586_986	Ortholog	UP000002356	9940	Eukaryota	Mammals	Ovis aries	W5Q8T9	W5Q8T9_SHEEP	dom1_547_924
Q5XXA6	ANO1 (DOG1, ORAOV2, TAOS2, TMEM16A)	CaCC	Chloride channels	dom1_586_986	Ortholog	UP000240080	9597	Eukaryota	Mammals	Pan paniscus	A0A2R8ZKA7	A0A2R8ZKA7_PANPA	dom1_550_950
Q5XXA6	ANO1 (DOG1, ORAOV2, TAOS2, TMEM16A)	CaCC	Chloride channels	dom1_586_986	Ortholog	UP000002277	9598	Eukaryota	Mammals	Pan troglodytes	A0A2I3SL13	A0A2I3SL13_PANTR	dom1_586_986
Q5XXA6	ANO1 (DOG1, ORAOV2, TAOS2, TMEM16A)	CaCC	Chloride channels	dom1_586_986	Ortholog	UP000028761	9555	Eukaryota	Mammals	Papio anubis	A0A096NYE7	A0A096NYE7_PAPAN	dom1_586_986
Q5XXA6	ANO1 (DOG1, ORAOV2, TAOS2, TMEM16A)	CaCC	Chloride channels	dom1_586_986	Ortholog	UP000515140	38626	Eukaryota	Mammals	Phascolarctos cinereus	A0A6P5IZD7	A0A6P5IZD7_PHACI	dom1_629_1022
Q5XXA6	ANO1 (DOG1, ORAOV2, TAOS2, TMEM16A)	CaCC	Chloride channels	dom1_586_986	Ortholog	UP000001595	9601	Eukaryota	Mammals	Pongo abelii	H2NCJ5	H2NCJ5_PONAB	dom1_586_986
Q5XXA6	ANO1 (DOG1, ORAOV2, TAOS2, TMEM16A)	CaCC	Chloride channels	dom1_586_986	Ortholog	UP000233160	379532	Eukaryota	Mammals	Propithecus coquereli	A0A2K6GPS8	A0A2K6GPS8_PROCO	dom1_583_983
Q5XXA6	ANO1 (DOG1, ORAOV2, TAOS2, TMEM16A)	CaCC	Chloride channels	dom1_586_986	Ortholog	UP000472240	59479	Eukaryota	Mammals	Rhinolophus ferrumequinum	A0A671FYL3	A0A671FYL3_RHIFE	dom1_717_1107
Q5XXA6	ANO1 (DOG1, ORAOV2, TAOS2, TMEM16A)	CaCC	Chloride channels	dom1_586_986	Ortholog	UP000233180	61621	Eukaryota	Mammals	Rhinopithecus bieti	A0A2K6JVS4	A0A2K6JVS4_RHIBE	dom1_562_962
Q5XXA6	ANO1 (DOG1, ORAOV2, TAOS2, TMEM16A)	CaCC	Chloride channels	dom1_586_986	Ortholog	UP000233200	61622	Eukaryota	Mammals	Rhinopithecus roxellana	A0A2K6PNG7	A0A2K6PNG7_RHIRO	dom1_586_986
Q5XXA6	ANO1 (DOG1, ORAOV2, TAOS2, TMEM16A)	CaCC	Chloride channels	dom1_586_986	Ortholog	UP000233220	39432	Eukaryota	Mammals	Saimiri boliviensis boliviensis	A0A2K6TFE9	A0A2K6TFE9_SAIBB	dom1_525_925
Q5XXA6	ANO1 (DOG1, ORAOV2, TAOS2, TMEM16A)	CaCC	Chloride channels	dom1_586_986	Ortholog	UP000472268	37032	Eukaryota	Mammals	Suricata suricatta	A0A673TC72	A0A673TC72_SURSU	dom1_440_831
Q5XXA6	ANO1 (DOG1, ORAOV2, TAOS2, TMEM16A)	CaCC	Chloride channels	dom1_586_986	Ortholog	UP000245320	9739	Eukaryota	Mammals	Tursiops truncatus	A0A6J3RS99	A0A6J3RS99_TURTR	dom1_586_962
Q5XXA6	ANO1 (DOG1, ORAOV2, TAOS2, TMEM16A)	CaCC	Chloride channels	dom1_586_986	Ortholog	UP000291022	9643	Eukaryota	Mammals	Ursus americanus	A0A452S635	A0A452S635_URSAM	dom1_586_975
Q5XXA6	ANO1 (DOG1, ORAOV2, TAOS2, TMEM16A)	CaCC	Chloride channels	dom1_586_986	Ortholog	UP000504605	30538	Eukaryota	Mammals	Vicugna pacos	A0A6J3BQZ4	A0A6J3BQZ4_VICPA	dom1_536_925
Q5XXA6	ANO1 (DOG1, ORAOV2, TAOS2, TMEM16A)	CaCC	Chloride channels	dom1_586_986	Ortholog	UP000314987	29139	Eukaryota	Mammals	Vombatus ursinus	A0A4X2MEQ2	A0A4X2MEQ2_VOMUR	dom1_689_1082
Q5XXA6	ANO1 (DOG1, ORAOV2, TAOS2, TMEM16A)	CaCC	Chloride channels	dom1_586_986	Ortholog	UP000286640	9627	Eukaryota	Mammals	Vulpes vulpes	A0A3Q7SSG7	A0A3Q7SSG7_VULVU	dom1_577_966
Q5XXA6	ANO1 (DOG1, ORAOV2, TAOS2, TMEM16A)	CaCC	Chloride channels	dom1_586_986	Ortholog	UP000019149	6210	Eukaryota	Platyhelminthes	Echinococcus granulosus	U6JHY6	U6JHY6_ECHGR	dom1_615_999
Q5XXA6	ANO1 (DOG1, ORAOV2, TAOS2, TMEM16A)	CaCC	Chloride channels	dom1_586_986	Ortholog	UP000001646	28377	Eukaryota	Reptiles	Anolis carolinensis	A0A803SS97	A0A803SS97_ANOCA	dom1_306_702
Q5XXA6	ANO1 (DOG1, ORAOV2, TAOS2, TMEM16A)	CaCC	Chloride channels	dom1_586_986	Ortholog	UP000694404	106734	Eukaryota	Reptiles	Chelonoidis abingdonii	A0A8C0GY46	A0A8C0GY46_CHEAB	dom1_601_996
Q5XXA6	ANO1 (DOG1, ORAOV2, TAOS2, TMEM16A)	CaCC	Chloride channels	dom1_586_986	Ortholog	UP000694380	8478	Eukaryota	Reptiles	Chrysemys picta bellii	A0A8C3HEI4	A0A8C3HEI4_CHRPI	dom1_637_1032
Q5XXA6	ANO1 (DOG1, ORAOV2, TAOS2, TMEM16A)	CaCC	Chloride channels	dom1_586_986	Ortholog	UP000594220	8502	Eukaryota	Reptiles	Crocodylus porosus	A0A7M4ER77	A0A7M4ER77_CROPO	dom1_649_1044
Q5XXA6	ANO1 (DOG1, ORAOV2, TAOS2, TMEM16A)	CaCC	Chloride channels	dom1_586_986	Ortholog	UP000007267	13735	Eukaryota	Reptiles	Pelodiscus sinensis	K7FTC6	K7FTC6_PELSI	dom1_584_977
Q5XXA6	ANO1 (DOG1, ORAOV2, TAOS2, TMEM16A)	CaCC	Chloride channels	dom1_586_986	Ortholog	UP000472272	64176	Eukaryota	Reptiles	Podarcis muralis	A0A670IC20	A0A670IC20_PODMU	dom1_641_1010
Q5XXA6	ANO1 (DOG1, ORAOV2, TAOS2, TMEM16A)	CaCC	Chloride channels	dom1_586_986	Ortholog	UP000472273	8673	Eukaryota	Reptiles	Pseudonaja textilis	A0A670YF15	A0A670YF15_PSETE	dom1_630_1025
Q5XXA6	ANO1 (DOG1, ORAOV2, TAOS2, TMEM16A)	CaCC	Chloride channels	dom1_586_986	Ortholog	UP000694421	96440	Eukaryota	Reptiles	Salvator merianae	A0A8D0B926	A0A8D0B926_SALMN	dom1_641_1034
Q5XXA6	ANO1 (DOG1, ORAOV2, TAOS2, TMEM16A)	CaCC	Chloride channels	dom1_586_986	Ortholog	UP000694392	8508	Eukaryota	Reptiles	Sphenodon punctatus	A0A8D0H5Z0	A0A8D0H5Z0_SPHPU	dom1_509_902
Q5XXA6	ANO1 (DOG1, ORAOV2, TAOS2, TMEM16A)	CaCC	Chloride channels	dom1_586_986	Ortholog	UP000694545	61221	Eukaryota	Reptiles	Varanus komodoensis	A0A8D2LDP6	A0A8D2LDP6_VARKO	dom1_438_836
Q9NW15	ANO10 (TMEM16K)	CaCC	Chloride channels	dom1_401_577	Ortholog	UP000007800	423536	Eukaryota	Alveolates	Perkinsus marinus (strain ATCC 50983 / TXsc)	C5K971	C5K971_PERM5	dom1_387_569
Q9NW15	ANO10 (TMEM16K)	CaCC	Chloride channels	dom1_401_577	Co-ortholog	UP000007800	423536	Eukaryota	Alveolates	Perkinsus marinus (strain ATCC 50983 / TXsc)	C5KR87	C5KR87_PERM5	dom1_393_575
Q9NW15	ANO10 (TMEM16K)	CaCC	Chloride channels	dom1_401_577	Ortholog	UP000039865	5949	Eukaryota	Alveolates	Stylonychia lemnae	A0A078ARJ0	A0A078ARJ0_STYLE	dom1_713_901
Q9NW15	ANO10 (TMEM16K)	CaCC	Chloride channels	dom1_401_577	Ortholog	UP000041254	1169540	Eukaryota	Alveolates	Vitrella brassicaformis (strain CCMP3155)	A0A0G4F7I4	A0A0G4F7I4_VITBC	dom1_560_746
Q9NW15	ANO10 (TMEM16K)	CaCC	Chloride channels	dom1_401_577	Ortholog	UP000186698	8355	Eukaryota	Amphibians	Xenopus laevis	A0A1L8FWG6	A0A1L8FWG6_XENLA	dom1_396_573
Q9NW15	ANO10 (TMEM16K)	CaCC	Chloride channels	dom1_401_577	Ortholog	UP000008143	8364	Eukaryota	Amphibians	Xenopus tropicalis	A0A6I8Q0X6	A0A6I8Q0X6_XENTR	dom1_396_573
Q9NW15	ANO10 (TMEM16K)	CaCC	Chloride channels	dom1_401_577	Ortholog	UP000014760	283909	Eukaryota	Annelida	Capitella teleta	R7TE23	R7TE23_CAPTE	dom1_393_592
Q9NW15	ANO10 (TMEM16K)	CaCC	Chloride channels	dom1_401_577	Ortholog	UP000015101	6412	Eukaryota	Annelida	Helobdella robusta	T1FTD8	T1FTD8_HELRO	dom1_432_644
Q9NW15	ANO10 (TMEM16K)	CaCC	Chloride channels	dom1_401_577	Ortholog	UP000008820	7159	Eukaryota	Arthropods	Aedes aegypti	A0A6I8TJ40	A0A6I8TJ40_AEDAE	dom1_479_672
Q9NW15	ANO10 (TMEM16K)	CaCC	Chloride channels	dom1_401_577	Ortholog	UP000000673	43151	Eukaryota	Arthropods	Anopheles darlingi	W5JFB7	W5JFB7_ANODA	dom1_470_663
Q9NW15	ANO10 (TMEM16K)	CaCC	Chloride channels	dom1_401_577	Ortholog	UP000007062	7165	Eukaryota	Arthropods	Anopheles gambiae	A0A1S4H2T6	A0A1S4H2T6_ANOGA	dom1_469_662
Q9NW15	ANO10 (TMEM16K)	CaCC	Chloride channels	dom1_401_577	Ortholog	UP000030765	74873	Eukaryota	Arthropods	Anopheles sinensis	A0A084WG86	A0A084WG86_ANOSI	dom1_470_679
Q9NW15	ANO10 (TMEM16K)	CaCC	Chloride channels	dom1_401_577	Ortholog	UP000076408	30069	Eukaryota	Arthropods	Anopheles stephensi	A0A182YDD6	A0A182YDD6_ANOST	dom1_464_657
Q9NW15	ANO10 (TMEM16K)	CaCC	Chloride channels	dom1_401_577	Ortholog	UP000005204	7091	Eukaryota	Arthropods	Bombyx mori	A0A8R2M922	A0A8R2M922_BOMMO	dom1_449_670
Q9NW15	ANO10 (TMEM16K)	CaCC	Chloride channels	dom1_401_577	Ortholog	UP000002320	7176	Eukaryota	Arthropods	Culex quinquefasciatus	B0WJ80	B0WJ80_CULQU	dom1_484_677
Q9NW15	ANO10 (TMEM16K)	CaCC	Chloride channels	dom1_401_577	Ortholog	UP000000305	6669	Eukaryota	Arthropods	Daphnia pulex	E9FW08	E9FW08_DAPPU	dom1_418_612
Q9NW15	ANO10 (TMEM16K)	CaCC	Chloride channels	dom1_401_577	Ortholog	UP000295192	7232	Eukaryota	Arthropods	Drosophila navojoa	A0A484AXP5	A0A484AXP5_DRONA	dom1_393_586
Q9NW15	ANO10 (TMEM16K)	CaCC	Chloride channels	dom1_401_577	Ortholog	UP000198287	158441	Eukaryota	Arthropods	Folsomia candida	A0A226E3H7	A0A226E3H7_FOLCA	dom1_483_708
Q9NW15	ANO10 (TMEM16K)	CaCC	Chloride channels	dom1_401_577	Ortholog	UP000037069	7375	Eukaryota	Arthropods	Lucilia cuprina	A0A0L0C2A4	A0A0L0C2A4_LUCCU	dom1_386_561
Q9NW15	ANO10 (TMEM16K)	CaCC	Chloride channels	dom1_401_577	Ortholog	UP000094527	48709	Eukaryota	Arthropods	Orchesella cincta	A0A1D2MZP6	A0A1D2MZP6_ORCCI	dom1_493_710
Q9NW15	ANO10 (TMEM16K)	CaCC	Chloride channels	dom1_401_577	Ortholog	UP000009046	121224	Eukaryota	Arthropods	Pediculus humanus subsp. corporis	E0VEM7	E0VEM7_PEDHC	dom1_395_604
Q9NW15	ANO10 (TMEM16K)	CaCC	Chloride channels	dom1_401_577	Ortholog	UP000070412	52283	Eukaryota	Arthropods	Sarcoptes scabiei	A0A132AL42	A0A132AL42_SARSC	dom1_387_560
Q9NW15	ANO10 (TMEM16K)	CaCC	Chloride channels	dom1_401_577	Ortholog	UP000015104	32264	Eukaryota	Arthropods	Tetranychus urticae	T1KCC0	T1KCC0_TETUR	dom1_430_625
Q9NW15	ANO10 (TMEM16K)	CaCC	Chloride channels	dom1_401_577	Ortholog	UP000007266	7070	Eukaryota	Arthropods	Tribolium castaneum	D6WMZ4	D6WMZ4_TRICA	dom1_446_652
Q9NW15	ANO10 (TMEM16K)	CaCC	Chloride channels	dom1_401_577	Ortholog	UP000694848	334116	Eukaryota	Arthropods	Vanessa tameamea	A0A8B8I4L2	A0A8B8I4L2_VANTA	dom1_449_671
Q9NW15	ANO10 (TMEM16K)	CaCC	Chloride channels	dom1_401_577	Ortholog	UP000594260	109461	Eukaryota	Arthropods	Varroa destructor	A0A7M7J5N2	A0A7M7J5N2_VARDE	dom1_434_634
Q9NW15	ANO10 (TMEM16K)	CaCC	Chloride channels	dom1_401_577	Ortholog	UP000027135	136037	Eukaryota	Arthropods	Zootermopsis nevadensis	A0A067QT48	A0A067QT48_ZOONE	dom1_385_614
Q9NW15	ANO10 (TMEM16K)	CaCC	Chloride channels	dom1_401_577	Ortholog	UP000077248	5599	Eukaryota	Ascomycota	Alternaria alternata	A0A177DXR5	A0A177DXR5_ALTAL	dom1_469_635
Q9NW15	ANO10 (TMEM16K)	CaCC	Chloride channels	dom1_401_577	Ortholog	UP000234474	1392255	Eukaryota	Ascomycota	Aspergillus novofumigatus (strain IBT 16806)	A0A2I1C721	A0A2I1C721_ASPN1	dom1_426_593
Q9NW15	ANO10 (TMEM16K)	CaCC	Chloride channels	dom1_401_577	Ortholog	UP000007963	341663	Eukaryota	Ascomycota	Aspergillus terreus (strain NIH 2624 / FGSC A1156)	Q0CNB9	Q0CNB9_ASPTN	dom1_426_609
Q9NW15	ANO10 (TMEM16K)	CaCC	Chloride channels	dom1_401_577	Ortholog	UP000235728	176275	Eukaryota	Ascomycota	Beauveria bassiana	A0A2N6NDN1	A0A2N6NDN1_BEABA	dom1_409_600
Q9NW15	ANO10 (TMEM16K)	CaCC	Chloride channels	dom1_401_577	Ortholog	UP000013521	1287680	Eukaryota	Ascomycota	Botryosphaeria parva (strain UCR-NP2)	R1GNL7	R1GNL7_BOTPV	dom1_431_591
Q9NW15	ANO10 (TMEM16K)	CaCC	Chloride channels	dom1_401_577	Ortholog	UP000008066	759272	Eukaryota	Ascomycota	Chaetomium thermophilum (strain DSM 1495 / CBS 144.50 / IMI 039719)	G0S5G1	G0S5G1_CHATD	dom1_453_608
Q9NW15	ANO10 (TMEM16K)	CaCC	Chloride channels	dom1_401_577	Ortholog	UP000016936	701091	Eukaryota	Ascomycota	Cochliobolus heterostrophus (strain C5 / ATCC 48332 / race O)	M2UC13	M2UC13_COCH5	dom1_430_593
Q9NW15	ANO10 (TMEM16K)	CaCC	Chloride channels	dom1_401_577	Ortholog	UP000016934	665912	Eukaryota	Ascomycota	Cochliobolus sativus (strain ND90Pr / ATCC 201652)	M2S7E3	M2S7E3_COCSN	dom1_472_635
Q9NW15	ANO10 (TMEM16K)	CaCC	Chloride channels	dom1_401_577	Ortholog	UP000015530	1237896	Eukaryota	Ascomycota	Colletotrichum gloeosporioides (strain Cg-14)	T0KFY1	T0KFY1_COLGC	dom1_429_597
Q9NW15	ANO10 (TMEM16K)	CaCC	Chloride channels	dom1_401_577	Ortholog	UP000193240	105696	Eukaryota	Ascomycota	Epicoccum nigrum	A0A1Y2MEQ6	A0A1Y2MEQ6_EPING	dom1_470_629
Q9NW15	ANO10 (TMEM16K)	CaCC	Chloride channels	dom1_401_577	Ortholog	UP000009097	426428	Eukaryota	Ascomycota	Fusarium oxysporum f. sp. lycopersici (strain 4287 / CBS 123668 / FGSC 9935 / NRRL 34936)	A0A0D2XWD7	A0A0D2XWD7_FUSO4	dom1_373_586
Q9NW15	ANO10 (TMEM16K)	CaCC	Chloride channels	dom1_401_577	Ortholog	UP000091967	36050	Eukaryota	Ascomycota	Fusarium poae	A0A1B8AFQ0	A0A1B8AFQ0_FUSPO	dom1_373_586
Q9NW15	ANO10 (TMEM16K)	CaCC	Chloride channels	dom1_401_577	Ortholog	UP000009096	334819	Eukaryota	Ascomycota	Gibberella moniliformis (strain M3125 / FGSC 7600)	W7M262	W7M262_GIBM7	dom1_444_586
Q9NW15	ANO10 (TMEM16K)	CaCC	Chloride channels	dom1_401_577	Ortholog	UP000005426	452589	Eukaryota	Ascomycota	Hypocrea atroviridis (strain ATCC 20476 / IMI 206040)	G9P121	G9P121_HYPAI	dom1_444_587
Q9NW15	ANO10 (TMEM16K)	CaCC	Chloride channels	dom1_401_577	Ortholog	UP000016923	1262450	Eukaryota	Ascomycota	Ophiostoma piceae (strain UAMH 11346)	S3C8V7	S3C8V7_OPHP1	dom1_461_615
Q9NW15	ANO10 (TMEM16K)	CaCC	Chloride channels	dom1_401_577	Ortholog	UP000001628	502780	Eukaryota	Ascomycota	Paracoccidioides brasiliensis (strain Pb18)	C1FZY5	C1FZY5_PARBD	dom1_437_624
Q9NW15	ANO10 (TMEM16K)	CaCC	Chloride channels	dom1_401_577	Ortholog	UP000001055	321614	Eukaryota	Ascomycota	Phaeosphaeria nodorum (strain SN15 / ATCC MYA-4574 / FGSC 10173)	Q0V1N7	Q0V1N7_PHANO	dom1_750_916
Q9NW15	ANO10 (TMEM16K)	CaCC	Chloride channels	dom1_401_577	Ortholog	UP000028545	563466	Eukaryota	Ascomycota	Pseudallescheria apiosperma	A0A084G1Q3	A0A084G1Q3_PSEDA	dom1_445_592
Q9NW15	ANO10 (TMEM16K)	CaCC	Chloride channels	dom1_401_577	Ortholog	UP000078340	33203	Eukaryota	Ascomycota	Purpureocillium lilacinum	A0A179I076	A0A179I076_PURLI	dom1_375_594
Q9NW15	ANO10 (TMEM16K)	CaCC	Chloride channels	dom1_401_577	Ortholog	UP000001881	771870	Eukaryota	Ascomycota	Sordaria macrospora (strain ATCC MYA-333 / DSM 997 / K(L3346) / K-hell)	F7VNJ0	F7VNJ0_SORMK	dom1_439_592
Q9NW15	ANO10 (TMEM16K)	CaCC	Chloride channels	dom1_401_577	Ortholog	UP000016931	692275	Eukaryota	Ascomycota	Sphaerulina musiva (strain SO2202)	M3D0Q6	M3D0Q6_SPHMS	dom1_426_590
Q9NW15	ANO10 (TMEM16K)	CaCC	Chloride channels	dom1_401_577	Ortholog	UP000054383	28573	Eukaryota	Ascomycota	Talaromyces islandicus	A0A0U1LZ77	A0A0U1LZ77_TALIS	dom1_422_591
Q9NW15	ANO10 (TMEM16K)	CaCC	Chloride channels	dom1_401_577	Ortholog	UP000001745	441959	Eukaryota	Ascomycota	Talaromyces stipitatus (strain ATCC 10500 / CBS 375.48 / QM 6759 / NRRL 1006)	B8MP59	B8MP59_TALSN	dom1_422_583
Q9NW15	ANO10 (TMEM16K)	CaCC	Chloride channels	dom1_401_577	Ortholog	UP000076632	1328760	Eukaryota	Ascomycota	Xylona heveae (strain CBS 132557 / TC161)	A0A165FPJ8	A0A165FPJ8_XYLHT	dom1_432_597
Q9NW15	ANO10 (TMEM16K)	CaCC	Chloride channels	dom1_401_577	Ortholog	UP000289152	5217	Eukaryota	Basidiomycota	Tremella mesenterica	A0A4Q1BWV1	A0A4Q1BWV1_TREME	dom1_472_630
Q9NW15	ANO10 (TMEM16K)	CaCC	Chloride channels	dom1_401_577	Ortholog	UP000006757	1220162	Eukaryota	Basidiomycota	Trichosporon asahii var. asahii (strain CBS 8904)	K1V0D6	K1V0D6_TRIAC	dom1_652_833
Q9NW15	ANO10 (TMEM16K)	CaCC	Chloride channels	dom1_401_577	Ortholog	UP000296049	8839	Eukaryota	Birds	Anas platyrhynchos	R0JYP0	R0JYP0_ANAPL	dom1_376_572
Q9NW15	ANO10 (TMEM16K)	CaCC	Chloride channels	dom1_401_577	Ortholog	UP000016666	8840	Eukaryota	Birds	Anas platyrhynchos platyrhynchos	A0A493TXE7	A0A493TXE7_ANAPP	dom1_376_572
Q9NW15	ANO10 (TMEM16K)	CaCC	Chloride channels	dom1_401_577	Ortholog	UP000472269	194338	Eukaryota	Birds	Athene cunicularia	A0A663MGD7	A0A663MGD7_ATHCN	dom1_376_572
Q9NW15	ANO10 (TMEM16K)	CaCC	Chloride channels	dom1_401_577	Ortholog	UP000276834	44316	Eukaryota	Birds	Chloebia gouldiae	A0A3L8T057	A0A3L8T057_CHLGU	dom1_394_593
Q9NW15	ANO10 (TMEM16K)	CaCC	Chloride channels	dom1_401_577	Ortholog	UP000603793	1196302	Eukaryota	Birds	Corvus moneduloides	A0A851WHD6	A0A851WHD6_CORMO	dom1_376_572
Q9NW15	ANO10 (TMEM16K)	CaCC	Chloride channels	dom1_401_577	Ortholog	UP000694562	100819	Eukaryota	Birds	Falco tinnunculus	A0A8C4V3D4	A0A8C4V3D4_FALTI	dom1_407_583
Q9NW15	ANO10 (TMEM16K)	CaCC	Chloride channels	dom1_401_577	Ortholog	UP000016665	59894	Eukaryota	Birds	Ficedula albicollis	A0A803V5E1	A0A803V5E1_FICAL	dom1_421_620
Q9NW15	ANO10 (TMEM16K)	CaCC	Chloride channels	dom1_401_577	Ortholog	UP000000539	9031	Eukaryota	Birds	Gallus gallus	A0A1D5P0N6	A0A1D5P0N6_CHICK	dom1_376_572
Q9NW15	ANO10 (TMEM16K)	CaCC	Chloride channels	dom1_401_577	Ortholog	UP000694408	40217	Eukaryota	Birds	Junco hyemalis	A0A8C5J2U6	A0A8C5J2U6_JUNHY	dom1_383_582
Q9NW15	ANO10 (TMEM16K)	CaCC	Chloride channels	dom1_401_577	Ortholog	UP000001645	9103	Eukaryota	Birds	Meleagris gallopavo	A0A803XRT2	A0A803XRT2_MELGA	dom1_376_572
Q9NW15	ANO10 (TMEM16K)	CaCC	Chloride channels	dom1_401_577	Ortholog	UP000694405	13146	Eukaryota	Birds	Melopsittacus undulatus	A0A8C6IPM3	A0A8C6IPM3_MELUD	dom1_376_572
Q9NW15	ANO10 (TMEM16K)	CaCC	Chloride channels	dom1_401_577	Ortholog	UP000472261	9054	Eukaryota	Birds	Phasianus colchicus	A0A669PAS1	A0A669PAS1_PHACC	dom1_376_572
Q9NW15	ANO10 (TMEM16K)	CaCC	Chloride channels	dom1_401_577	Ortholog	UP000694409	9135	Eukaryota	Birds	Serinus canaria	A0A8C9KVY3	A0A8C9KVY3_SERCA	dom1_383_582
Q9NW15	ANO10 (TMEM16K)	CaCC	Chloride channels	dom1_401_577	Ortholog	UP000472266	2489341	Eukaryota	Birds	Strigops habroptila	A0A672TSH6	A0A672TSH6_STRHB	dom1_376_572
Q9NW15	ANO10 (TMEM16K)	CaCC	Chloride channels	dom1_401_577	Ortholog	UP000007754	59729	Eukaryota	Birds	Taeniopygia guttata	A0A674HBS7	A0A674HBS7_TAEGU	dom1_383_582
Q9NW15	ANO10 (TMEM16K)	CaCC	Chloride channels	dom1_401_577	Ortholog	UP000002009	296587	Eukaryota	Chlorophytes	Micromonas commoda (strain RCC299 / NOUM17 / CCMP2709)	C1EJ07	C1EJ07_MICCC	dom1_86_266
Q9NW15	ANO10 (TMEM16K)	CaCC	Chloride channels	dom1_401_577	Ortholog	UP000694840	6087	Eukaryota	Cnidaria	Hydra vulgaris	A0A8B6XF84	A0A8B6XF84_HYDVU	dom1_410_588
Q9NW15	ANO10 (TMEM16K)	CaCC	Chloride channels	dom1_401_577	Ortholog	UP000001593	45351	Eukaryota	Cnidaria	Nematostella vectensis	A7STD6	A7STD6_NEMVE	dom1_329_510
Q9NW15	ANO10 (TMEM16K)	CaCC	Chloride channels	dom1_401_577	Ortholog	UP000051952	75058	Eukaryota	Discoba	Bodo saltans	A0A0S4IPB7	A0A0S4IPB7_BODSA	dom1_90_288
Q9NW15	ANO10 (TMEM16K)	CaCC	Chloride channels	dom1_401_577	Ortholog	UP000694845	133434	Eukaryota	Echinoderm	Acanthaster planci	A0A8B7XQZ6	A0A8B7XQZ6_ACAPL	dom1_415_619
Q9NW15	ANO10 (TMEM16K)	CaCC	Chloride channels	dom1_401_577	Ortholog	UP000007110	7668	Eukaryota	Echinoderm	Strongylocentrotus purpuratus	A0A7M7LLC9	A0A7M7LLC9_STRPU	dom1_448_656
Q9NW15	ANO10 (TMEM16K)	CaCC	Chloride channels	dom1_401_577	Ortholog	UP000257160	80972	Eukaryota	Fishes	Amphiprion ocellaris	A0A3Q1BXI0	A0A3Q1BXI0_AMPOC	dom1_400_578
Q9NW15	ANO10 (TMEM16K)	CaCC	Chloride channels	dom1_401_577	Ortholog	UP000265080	161767	Eukaryota	Fishes	Amphiprion percula	A0A3P8SIX6	A0A3P8SIX6_AMPPE	dom1_391_569
Q9NW15	ANO10 (TMEM16K)	CaCC	Chloride channels	dom1_401_577	Ortholog	UP000265040	64144	Eukaryota	Fishes	Anabas testudineus	A0A3Q1GW69	A0A3Q1GW69_ANATE	dom1_400_578
Q9NW15	ANO10 (TMEM16K)	CaCC	Chloride channels	dom1_401_577	Ortholog	UP000018467	7994	Eukaryota	Fishes	Astyanax mexicanus	A0A3B1K8L0	A0A3B1K8L0_ASTMX	dom1_401_577
Q9NW15	ANO10 (TMEM16K)	CaCC	Chloride channels	dom1_401_577	Ortholog	UP000314986	7868	Eukaryota	Fishes	Callorhinchus milii	A0A4W3HHW5	A0A4W3HHW5_CALMI	dom1_398_574
Q9NW15	ANO10 (TMEM16K)	CaCC	Chloride channels	dom1_401_577	Ortholog	UP000265120	244447	Eukaryota	Fishes	Cynoglossus semilaevis	A0A3P8VR31	A0A3P8VR31_CYNSE	dom1_398_576
Q9NW15	ANO10 (TMEM16K)	CaCC	Chloride channels	dom1_401_577	Ortholog	UP000000437	7955	Eukaryota	Fishes	Danio rerio	Q4V8U5	ANO10_DANRE	dom1_401_577
Q9NW15	ANO10 (TMEM16K)	CaCC	Chloride channels	dom1_401_577	Ortholog	UP000472264	173247	Eukaryota	Fishes	Echeneis naucrates	A0A665WQ09	A0A665WQ09_ECHNA	dom1_399_587
Q9NW15	ANO10 (TMEM16K)	CaCC	Chloride channels	dom1_401_577	Ortholog	UP000314983	8005	Eukaryota	Fishes	Electrophorus electricus	A0A4W4FHA5	A0A4W4FHA5_ELEEL	dom1_401_577
Q9NW15	ANO10 (TMEM16K)	CaCC	Chloride channels	dom1_401_577	Ortholog	UP000265140	8010	Eukaryota	Fishes	Esox lucius	A0A6Q2X905	A0A6Q2X905_ESOLU	dom1_401_577
Q9NW15	ANO10 (TMEM16K)	CaCC	Chloride channels	dom1_401_577	Ortholog	UP000694546	8049	Eukaryota	Fishes	Gadus morhua	A0A8C5A5P8	A0A8C5A5P8_GADMO	dom1_401_579
Q9NW15	ANO10 (TMEM16K)	CaCC	Chloride channels	dom1_401_577	Ortholog	UP000250572	33528	Eukaryota	Fishes	Gambusia affinis	A0A315VHV2	A0A315VHV2_GAMAF	dom1_377_576
Q9NW15	ANO10 (TMEM16K)	CaCC	Chloride channels	dom1_401_577	Ortholog	UP000007635	69293	Eukaryota	Fishes	Gasterosteus aculeatus	G3NI36	G3NI36_GASAC	dom1_400_578
Q9NW15	ANO10 (TMEM16K)	CaCC	Chloride channels	dom1_401_577	Ortholog	UP000264840	8153	Eukaryota	Fishes	Haplochromis burtoni	A0A3Q2W320	A0A3Q2W320_HAPBU	dom1_400_578
Q9NW15	ANO10 (TMEM16K)	CaCC	Chloride channels	dom1_401_577	Ortholog	UP000264800	37003	Eukaryota	Fishes	Kryptolebias marmoratus	A0A3Q2ZYZ6	A0A3Q2ZYZ6_KRYMA	dom1_428_606
Q9NW15	ANO10 (TMEM16K)	CaCC	Chloride channels	dom1_401_577	Ortholog	UP000008672	7897	Eukaryota	Fishes	Latimeria chalumnae	H2ZTP8	H2ZTP8_LATCH	dom1_380_564
Q9NW15	ANO10 (TMEM16K)	CaCC	Chloride channels	dom1_401_577	Ortholog	UP000018468	7918	Eukaryota	Fishes	Lepisosteus oculatus	W5LYT5	W5LYT5_LEPOC	dom1_401_575
Q9NW15	ANO10 (TMEM16K)	CaCC	Chloride channels	dom1_401_577	Ortholog	UP000261620	94237	Eukaryota	Fishes	Mola mola	A0A3Q3VXY8	A0A3Q3VXY8_MOLML	dom1_346_492
Q9NW15	ANO10 (TMEM16K)	CaCC	Chloride channels	dom1_401_577	Ortholog	UP000261580	32507	Eukaryota	Fishes	Neolamprologus brichardi	A0A3Q4MA82	A0A3Q4MA82_NEOBR	dom1_334_420
Q9NW15	ANO10 (TMEM16K)	CaCC	Chloride channels	dom1_401_577	Ortholog	UP000694548	105023	Eukaryota	Fishes	Nothobranchius furzeri	A0A8C6PL90	A0A8C6PL90_NOTFU	dom1_398_576
Q9NW15	ANO10 (TMEM16K)	CaCC	Chloride channels	dom1_401_577	Ortholog	UP000472276	47969	Eukaryota	Fishes	Oreochromis aureus	A0A668UTE5	A0A668UTE5_OREAU	dom1_400_578
Q9NW15	ANO10 (TMEM16K)	CaCC	Chloride channels	dom1_401_577	Ortholog	UP000005207	8128	Eukaryota	Fishes	Oreochromis niloticus	A0A669ETT8	A0A669ETT8_ORENI	dom1_400_578
Q9NW15	ANO10 (TMEM16K)	CaCC	Chloride channels	dom1_401_577	Ortholog	UP000283210	123683	Eukaryota	Fishes	Oryzias javanicus	A0A3S2PJ24	A0A3S2PJ24_ORYJA	dom1_449_627
Q9NW15	ANO10 (TMEM16K)	CaCC	Chloride channels	dom1_401_577	Ortholog	UP000001038	8090	Eukaryota	Fishes	Oryzias latipes	A0A3B3I5M1	A0A3B3I5M1_ORYLA	dom1_399_577
Q9NW15	ANO10 (TMEM16K)	CaCC	Chloride channels	dom1_401_577	Ortholog	UP000646548	30732	Eukaryota	Fishes	Oryzias melastigma	A0A834BS82	A0A834BS82_ORYME	dom1_399_577
Q9NW15	ANO10 (TMEM16K)	CaCC	Chloride channels	dom1_401_577	Ortholog	UP000245300	7757	Eukaryota	Fishes	Petromyzon marinus	S4RM14	S4RM14_PETMA	dom1_385_587
Q9NW15	ANO10 (TMEM16K)	CaCC	Chloride channels	dom1_401_577	Ortholog	UP000028760	48698	Eukaryota	Fishes	Poecilia formosa	A0A087XQI5	A0A087XQI5_POEFO	dom1_377_576
Q9NW15	ANO10 (TMEM16K)	CaCC	Chloride channels	dom1_401_577	Ortholog	UP000242638	8081	Eukaryota	Fishes	Poecilia reticulata	A0A3P9P2Z3	A0A3P9P2Z3_POERE	dom1_383_581
Q9NW15	ANO10 (TMEM16K)	CaCC	Chloride channels	dom1_401_577	Ortholog	UP000246464	52904	Eukaryota	Fishes	Scophthalmus maximus	A0A2U9AZN5	A0A2U9AZN5_SCOMX	dom1_396_574
Q9NW15	ANO10 (TMEM16K)	CaCC	Chloride channels	dom1_401_577	Ortholog	UP000288216	75743	Eukaryota	Fishes	Scyliorhinus torazame	A0A401NYT1	A0A401NYT1_SCYTO	dom1_396_491
Q9NW15	ANO10 (TMEM16K)	CaCC	Chloride channels	dom1_401_577	Ortholog	UP000472262	75366	Eukaryota	Fishes	Sinocyclocheilus grahami	A0A672M1M7	A0A672M1M7_SINGR	dom1_401_580
Q9NW15	ANO10 (TMEM16K)	CaCC	Chloride channels	dom1_401_577	Ortholog	UP000472265	8175	Eukaryota	Fishes	Sparus aurata	A0A671XLD2	A0A671XLD2_SPAAU	dom1_440_674
Q9NW15	ANO10 (TMEM16K)	CaCC	Chloride channels	dom1_401_577	Ortholog	UP000005226	31033	Eukaryota	Fishes	Takifugu rubripes	A0A674PJ92	A0A674PJ92_TAKRU	dom1_398_576
Q9NW15	ANO10 (TMEM16K)	CaCC	Chloride channels	dom1_401_577	Ortholog	UP000007303	99883	Eukaryota	Fishes	Tetraodon nigroviridis	H3BXL9	H3BXL9_TETNG	dom1_424_602
Q9NW15	ANO10 (TMEM16K)	CaCC	Chloride channels	dom1_401_577	Ortholog	UP000002852	8083	Eukaryota	Fishes	Xiphophorus maculatus	A0A3B5QH96	A0A3B5QH96_XIPMA	dom1_377_576
Q9NW15	ANO10 (TMEM16K)	CaCC	Chloride channels	dom1_401_577	Ortholog	UP000008912	9646	Eukaryota	Mammals	Ailuropoda melanoleuca	A0A7N5JHB1	A0A7N5JHB1_AILME	dom1_381_577
Q9NW15	ANO10 (TMEM16K)	CaCC	Chloride channels	dom1_401_577	Ortholog	UP000233020	37293	Eukaryota	Mammals	Aotus nancymaae	A0A2K5C671	A0A2K5C671_AOTNA	dom1_401_577
Q9NW15	ANO10 (TMEM16K)	CaCC	Chloride channels	dom1_401_577	Ortholog	UP000694857	9771	Eukaryota	Mammals	Balaenoptera musculus	A0A8C0E7T4	A0A8C0E7T4_BALMU	dom1_401_577
Q9NW15	ANO10 (TMEM16K)	CaCC	Chloride channels	dom1_401_577	Ortholog	UP000314981	30522	Eukaryota	Mammals	Bos indicus x Bos taurus	A0A4W2DMQ9	A0A4W2DMQ9_BOBOX	dom1_401_577
Q9NW15	ANO10 (TMEM16K)	CaCC	Chloride channels	dom1_401_577	Ortholog	UP000009136	9913	Eukaryota	Mammals	Bos taurus	F1MX70	F1MX70_BOVIN	dom1_401_577
Q9NW15	ANO10 (TMEM16K)	CaCC	Chloride channels	dom1_401_577	Ortholog	UP000008225	9483	Eukaryota	Mammals	Callithrix jacchus	U3DKS8	U3DKS8_CALJA	dom1_401_577
Q9NW15	ANO10 (TMEM16K)	CaCC	Chloride channels	dom1_401_577	Ortholog	UP000002254	9615	Eukaryota	Mammals	Canis lupus familiaris	A0A8P0NTS5	A0A8P0NTS5_CANLF	dom1_381_577
Q9NW15	ANO10 (TMEM16K)	CaCC	Chloride channels	dom1_401_577	Ortholog	UP000291000	9925	Eukaryota	Mammals	Capra hircus	A0A452EB09	A0A452EB09_CAPHI	dom1_401_577
Q9NW15	ANO10 (TMEM16K)	CaCC	Chloride channels	dom1_401_577	Ortholog	UP000189704	1868482	Eukaryota	Mammals	Carlito syrichta	A0A3Q0EHP3	A0A3Q0EHP3_CARSF	dom1_401_577
Q9NW15	ANO10 (TMEM16K)	CaCC	Chloride channels	dom1_401_577	Ortholog	UP000005447	10141	Eukaryota	Mammals	Cavia porcellus	H0WBF0	H0WBF0_CAVPO	dom1_402_578
Q9NW15	ANO10 (TMEM16K)	CaCC	Chloride channels	dom1_401_577	Ortholog	UP000233040	2715852	Eukaryota	Mammals	Cebus imitator	A0A2K5R9B8	A0A2K5R9B8_CEBIM	dom1_401_577
Q9NW15	ANO10 (TMEM16K)	CaCC	Chloride channels	dom1_401_577	Ortholog	UP000233060	9531	Eukaryota	Mammals	Cercocebus atys	A0A2K5MDZ3	A0A2K5MDZ3_CERAT	dom1_401_577
Q9NW15	ANO10 (TMEM16K)	CaCC	Chloride channels	dom1_401_577	Ortholog	UP000694398	34839	Eukaryota	Mammals	Chinchilla lanigera	A0A8C2YTY8	A0A8C2YTY8_CHILA	dom1_401_577
Q9NW15	ANO10 (TMEM16K)	CaCC	Chloride channels	dom1_401_577	Ortholog	UP000029965	60711	Eukaryota	Mammals	Chlorocebus sabaeus	A0A0D9RVX3	A0A0D9RVX3_CHLSB	dom1_401_577
Q9NW15	ANO10 (TMEM16K)	CaCC	Chloride channels	dom1_401_577	Ortholog	UP000233080	336983	Eukaryota	Mammals	Colobus angolensis palliatus	A0A2K5IUN8	A0A2K5IUN8_COLAP	dom1_401_577
Q9NW15	ANO10 (TMEM16K)	CaCC	Chloride channels	dom1_401_577	Ortholog	UP000001075	10029	Eukaryota	Mammals	Cricetulus griseus	G3H973	G3H973_CRIGR	dom1_401_577
Q9NW15	ANO10 (TMEM16K)	CaCC	Chloride channels	dom1_401_577	Ortholog	UP000081671	10020	Eukaryota	Mammals	Dipodomys ordii	A0A1S3GAD5	A0A1S3GAD5_DIPOR	dom1_401_577
Q9NW15	ANO10 (TMEM16K)	CaCC	Chloride channels	dom1_401_577	Ortholog	UP000002281	9796	Eukaryota	Mammals	Equus caballus	A0A3Q2HN93	A0A3Q2HN93_HORSE	dom1_401_597
Q9NW15	ANO10 (TMEM16K)	CaCC	Chloride channels	dom1_401_577	Ortholog	UP000079721	9365	Eukaryota	Mammals	Erinaceus europaeus	A0A1S3AIZ9	A0A1S3AIZ9_ERIEU	dom1_401_577
Q9NW15	ANO10 (TMEM16K)	CaCC	Chloride channels	dom1_401_577	Ortholog	UP000011712	9685	Eukaryota	Mammals	Felis catus	A0A2I2V294	A0A2I2V294_FELCA	dom1_381_577
Q9NW15	ANO10 (TMEM16K)	CaCC	Chloride channels	dom1_401_577	Ortholog	UP000028990	885580	Eukaryota	Mammals	Fukomys damarensis	A0A091DQF2	A0A091DQF2_FUKDA	dom1_405_575
Q9NW15	ANO10 (TMEM16K)	CaCC	Chloride channels	dom1_401_577	Ortholog	UP000001519	9595	Eukaryota	Mammals	Gorilla gorilla gorilla	G3RE27	G3RE27_GORGO	dom1_401_577
Q9NW15	ANO10 (TMEM16K)	CaCC	Chloride channels	dom1_401_577	Ortholog	UP000006813	10181	Eukaryota	Mammals	Heterocephalus glaber	G5C203	G5C203_HETGA	dom1_401_577
Q9NW15	ANO10 (TMEM16K)	CaCC	Chloride channels	dom1_401_577	Ortholog	UP000005215	43179	Eukaryota	Mammals	Ictidomys tridecemlineatus	I3LZQ7	I3LZQ7_ICTTR	dom1_401_577
Q9NW15	ANO10 (TMEM16K)	CaCC	Chloride channels	dom1_401_577	Ortholog	UP000694385	51337	Eukaryota	Mammals	Jaculus jaculus	A0A8C5KVK7	A0A8C5KVK7_JACJA	dom1_381_577
Q9NW15	ANO10 (TMEM16K)	CaCC	Chloride channels	dom1_401_577	Ortholog	UP000007646	9785	Eukaryota	Mammals	Loxodonta africana	G3TJG6	G3TJG6_LOXAF	dom1_401_577
Q9NW15	ANO10 (TMEM16K)	CaCC	Chloride channels	dom1_401_577	Ortholog	UP000233100	9541	Eukaryota	Mammals	Macaca fascicularis	A0A7N9D0F9	A0A7N9D0F9_MACFA	dom1_422_598
Q9NW15	ANO10 (TMEM16K)	CaCC	Chloride channels	dom1_401_577	Ortholog	UP000006718	9544	Eukaryota	Mammals	Macaca mulatta	A0A1D5QCW0	A0A1D5QCW0_MACMU	dom1_422_598
Q9NW15	ANO10 (TMEM16K)	CaCC	Chloride channels	dom1_401_577	Ortholog	UP000233120	9545	Eukaryota	Mammals	Macaca nemestrina	A0A2K6DW02	A0A2K6DW02_MACNE	dom1_401_577
Q9NW15	ANO10 (TMEM16K)	CaCC	Chloride channels	dom1_401_577	Ortholog	UP000233140	9568	Eukaryota	Mammals	Mandrillus leucophaeus	A0A2K5YR23	A0A2K5YR23_MANLE	dom1_401_577
Q9NW15	ANO10 (TMEM16K)	CaCC	Chloride channels	dom1_401_577	Ortholog	UP000694394	30608	Eukaryota	Mammals	Microcebus murinus	A0A8C5Y6U6	A0A8C5Y6U6_MICMU	dom1_401_577
Q9NW15	ANO10 (TMEM16K)	CaCC	Chloride channels	dom1_401_577	Ortholog	UP000002280	13616	Eukaryota	Mammals	Monodelphis domestica	F6UJG9	F6UJG9_MONDO	dom1_402_581
Q9NW15	ANO10 (TMEM16K)	CaCC	Chloride channels	dom1_401_577	Ortholog	UP000000589	10090	Eukaryota	Mammals	Mus musculus	Q8BH79	ANO10_MOUSE	dom1_401_577
Q9NW15	ANO10 (TMEM16K)	CaCC	Chloride channels	dom1_401_577	Ortholog	UP000000715	9669	Eukaryota	Mammals	Mustela putorius furo	M3YNG4	M3YNG4_MUSPF	dom1_381_577
Q9NW15	ANO10 (TMEM16K)	CaCC	Chloride channels	dom1_401_577	Ortholog	UP000001074	59463	Eukaryota	Mammals	Myotis lucifugus	G1Q899	G1Q899_MYOLU	dom1_401_619
Q9NW15	ANO10 (TMEM16K)	CaCC	Chloride channels	dom1_401_577	Ortholog	UP000694381	1026970	Eukaryota	Mammals	Nannospalax galili	A0A8C6RTG0	A0A8C6RTG0_NANGA	dom1_401_577
Q9NW15	ANO10 (TMEM16K)	CaCC	Chloride channels	dom1_401_577	Ortholog	UP000001073	61853	Eukaryota	Mammals	Nomascus leucogenys	G1R1T1	G1R1T1_NOMLE	dom1_401_577
Q9NW15	ANO10 (TMEM16K)	CaCC	Chloride channels	dom1_401_577	Ortholog	UP000515203	10160	Eukaryota	Mammals	Octodon degus	A0A6P6D8T9	A0A6P6D8T9_OCTDE	dom1_401_577
Q9NW15	ANO10 (TMEM16K)	CaCC	Chloride channels	dom1_401_577	Ortholog	UP000002279	9258	Eukaryota	Mammals	Ornithorhynchus anatinus	A0A6I8P8G8	A0A6I8P8G8_ORNAN	dom1_426_602
Q9NW15	ANO10 (TMEM16K)	CaCC	Chloride channels	dom1_401_577	Ortholog	UP000001811	9986	Eukaryota	Mammals	Oryctolagus cuniculus	G1SUV0	G1SUV0_RABIT	dom1_401_577
Q9NW15	ANO10 (TMEM16K)	CaCC	Chloride channels	dom1_401_577	Ortholog	UP000005225	30611	Eukaryota	Mammals	Otolemur garnettii	H0XAB2	H0XAB2_OTOGA	dom1_401_577
Q9NW15	ANO10 (TMEM16K)	CaCC	Chloride channels	dom1_401_577	Ortholog	UP000002356	9940	Eukaryota	Mammals	Ovis aries	A0A6P3YRK3	A0A6P3YRK3_SHEEP	dom1_401_577
Q9NW15	ANO10 (TMEM16K)	CaCC	Chloride channels	dom1_401_577	Ortholog	UP000240080	9597	Eukaryota	Mammals	Pan paniscus	A0A2R8ZC63	A0A2R8ZC63_PANPA	dom1_372_551
Q9NW15	ANO10 (TMEM16K)	CaCC	Chloride channels	dom1_401_577	Ortholog	UP000002277	9598	Eukaryota	Mammals	Pan troglodytes	H2QME1	H2QME1_PANTR	dom1_401_577
Q9NW15	ANO10 (TMEM16K)	CaCC	Chloride channels	dom1_401_577	Ortholog	UP000028761	9555	Eukaryota	Mammals	Papio anubis	A0A096N625	A0A096N625_PAPAN	dom1_401_577
Q9NW15	ANO10 (TMEM16K)	CaCC	Chloride channels	dom1_401_577	Ortholog	UP000515140	38626	Eukaryota	Mammals	Phascolarctos cinereus	A0A6P5KW02	A0A6P5KW02_PHACI	dom1_382_581
Q9NW15	ANO10 (TMEM16K)	CaCC	Chloride channels	dom1_401_577	Ortholog	UP000001595	9601	Eukaryota	Mammals	Pongo abelii	A0A6D2XTL7	A0A6D2XTL7_PONAB	dom1_401_577
Q9NW15	ANO10 (TMEM16K)	CaCC	Chloride channels	dom1_401_577	Ortholog	UP000233160	379532	Eukaryota	Mammals	Propithecus coquereli	A0A2K6F361	A0A2K6F361_PROCO	dom1_401_577
Q9NW15	ANO10 (TMEM16K)	CaCC	Chloride channels	dom1_401_577	Ortholog	UP000515202	132908	Eukaryota	Mammals	Pteropus vampyrus	A0A6P3Q1T7	A0A6P3Q1T7_PTEVA	dom1_416_592
Q9NW15	ANO10 (TMEM16K)	CaCC	Chloride channels	dom1_401_577	Ortholog	UP000472240	59479	Eukaryota	Mammals	Rhinolophus ferrumequinum	A0A671F5A9	A0A671F5A9_RHIFE	dom1_377_553
Q9NW15	ANO10 (TMEM16K)	CaCC	Chloride channels	dom1_401_577	Ortholog	UP000233180	61621	Eukaryota	Mammals	Rhinopithecus bieti	A0A2K6LBJ6	A0A2K6LBJ6_RHIBE	dom1_401_577
Q9NW15	ANO10 (TMEM16K)	CaCC	Chloride channels	dom1_401_577	Ortholog	UP000233200	61622	Eukaryota	Mammals	Rhinopithecus roxellana	A0A2K6PV39	A0A2K6PV39_RHIRO	dom1_401_577
Q9NW15	ANO10 (TMEM16K)	CaCC	Chloride channels	dom1_401_577	Ortholog	UP000233220	39432	Eukaryota	Mammals	Saimiri boliviensis boliviensis	A0A2K6V0Y6	A0A2K6V0Y6_SAIBB	dom1_401_577
Q9NW15	ANO10 (TMEM16K)	CaCC	Chloride channels	dom1_401_577	Ortholog	UP000007648	9305	Eukaryota	Mammals	Sarcophilus harrisii	A0A7N4PZA1	A0A7N4PZA1_SARHA	dom1_402_590
Q9NW15	ANO10 (TMEM16K)	CaCC	Chloride channels	dom1_401_577	Ortholog	UP000245320	9739	Eukaryota	Mammals	Tursiops truncatus	A0A6J3S0Y7	A0A6J3S0Y7_TURTR	dom1_401_577
Q9NW15	ANO10 (TMEM16K)	CaCC	Chloride channels	dom1_401_577	Ortholog	UP000291022	9643	Eukaryota	Mammals	Ursus americanus	A0A452R3P5	A0A452R3P5_URSAM	dom1_212_408
Q9NW15	ANO10 (TMEM16K)	CaCC	Chloride channels	dom1_401_577	Ortholog	UP000261680	29073	Eukaryota	Mammals	Ursus maritimus	A0A8M1GMR2	A0A8M1GMR2_URSMA	dom1_381_577
Q9NW15	ANO10 (TMEM16K)	CaCC	Chloride channels	dom1_401_577	Ortholog	UP000504605	30538	Eukaryota	Mammals	Vicugna pacos	A0A6J3B8T5	A0A6J3B8T5_VICPA	dom1_381_577
Q9NW15	ANO10 (TMEM16K)	CaCC	Chloride channels	dom1_401_577	Ortholog	UP000314987	29139	Eukaryota	Mammals	Vombatus ursinus	A0A4X2LWU7	A0A4X2LWU7_VOMUR	dom1_402_581
Q9NW15	ANO10 (TMEM16K)	CaCC	Chloride channels	dom1_401_577	Ortholog	UP000286640	9627	Eukaryota	Mammals	Vulpes vulpes	A0A3Q7UX42	A0A3Q7UX42_VULVU	dom1_381_577
Q9NW15	ANO10 (TMEM16K)	CaCC	Chloride channels	dom1_401_577	Ortholog	UP000005408	29159	Eukaryota	Mollusca	Crassostrea gigas	A0A8W8JM58	A0A8W8JM58_CRAGI	dom1_48_257
Q9NW15	ANO10 (TMEM16K)	CaCC	Chloride channels	dom1_401_577	Ortholog	UP000030746	225164	Eukaryota	Mollusca	Lottia gigantea	V3ZVB3	V3ZVB3_LOTGI	dom1_407_591
Q9NW15	ANO10 (TMEM16K)	CaCC	Chloride channels	dom1_401_577	Ortholog	UP000078561	4829	Eukaryota	Mucoromycota	Absidia glauca	A0A168PDQ2	A0A168PDQ2_ABSGL	dom1_423_655
Q9NW15	ANO10 (TMEM16K)	CaCC	Chloride channels	dom1_401_577	Ortholog	UP000014254	1220926	Eukaryota	Mucoromycota	Mucor circinelloides f. circinelloides (strain 1006PhL)	S2JU95	S2JU95_MUCC1	dom1_449_664
Q9NW15	ANO10 (TMEM16K)	CaCC	Chloride channels	dom1_401_577	Ortholog	UP000009138	246409	Eukaryota	Mucoromycota	Rhizopus delemar (strain RA 99-880 / ATCC MYA-4621 / FGSC 9543 / NRRL 43880)	I1CTA0	I1CTA0_RHIO9	dom1_412_628
Q9NW15	ANO10 (TMEM16K)	CaCC	Chloride channels	dom1_401_577	Ortholog	UP000242180	13706	Eukaryota	Mucoromycota	Syncephalastrum racemosum	A0A1X2HGY4	A0A1X2HGY4_SYNRA	dom1_394_603
Q9NW15	ANO10 (TMEM16K)	CaCC	Chloride channels	dom1_401_577	Ortholog	UP000019149	6210	Eukaryota	Platyhelminthes	Echinococcus granulosus	U6J3X6	U6J3X6_ECHGR	dom1_421_621
Q9NW15	ANO10 (TMEM16K)	CaCC	Chloride channels	dom1_401_577	Ortholog	UP000001646	28377	Eukaryota	Reptiles	Anolis carolinensis	A0A803TYI8	A0A803TYI8_ANOCA	dom1_380_576
Q9NW15	ANO10 (TMEM16K)	CaCC	Chloride channels	dom1_401_577	Ortholog	UP000694404	106734	Eukaryota	Reptiles	Chelonoidis abingdonii	A0A8C0HCJ6	A0A8C0HCJ6_CHEAB	dom1_397_569
Q9NW15	ANO10 (TMEM16K)	CaCC	Chloride channels	dom1_401_577	Ortholog	UP000694380	8478	Eukaryota	Reptiles	Chrysemys picta bellii	A0A8C3IEP7	A0A8C3IEP7_CHRPI	dom1_381_577
Q9NW15	ANO10 (TMEM16K)	CaCC	Chloride channels	dom1_401_577	Ortholog	UP000594220	8502	Eukaryota	Reptiles	Crocodylus porosus	A0A7M4FTY2	A0A7M4FTY2_CROPO	dom1_401_580
Q9NW15	ANO10 (TMEM16K)	CaCC	Chloride channels	dom1_401_577	Ortholog	UP000007267	13735	Eukaryota	Reptiles	Pelodiscus sinensis	K7FRS7	K7FRS7_PELSI	dom1_401_577
Q9NW15	ANO10 (TMEM16K)	CaCC	Chloride channels	dom1_401_577	Ortholog	UP000472272	64176	Eukaryota	Reptiles	Podarcis muralis	A0A670KBT3	A0A670KBT3_PODMU	dom1_380_576
Q9NW15	ANO10 (TMEM16K)	CaCC	Chloride channels	dom1_401_577	Ortholog	UP000472273	8673	Eukaryota	Reptiles	Pseudonaja textilis	A0A670Z298	A0A670Z298_PSETE	dom1_226_402
Q9NW15	ANO10 (TMEM16K)	CaCC	Chloride channels	dom1_401_577	Ortholog	UP000694421	96440	Eukaryota	Reptiles	Salvator merianae	A0A8D0BUX5	A0A8D0BUX5_SALMN	dom1_324_520
Q9NW15	ANO10 (TMEM16K)	CaCC	Chloride channels	dom1_401_577	Ortholog	UP000694392	8508	Eukaryota	Reptiles	Sphenodon punctatus	A0A8D0H8Z4	A0A8D0H8Z4_SPHPU	dom1_245_441
Q9NW15	ANO10 (TMEM16K)	CaCC	Chloride channels	dom1_401_577	Ortholog	UP000694545	61221	Eukaryota	Reptiles	Varanus komodoensis	A0A8D2IYT0	A0A8D2IYT0_VARKO	dom1_380_576
Q9NW15	ANO10 (TMEM16K)	CaCC	Chloride channels	dom1_401_577	Ortholog	UP000019132	431595	Eukaryota	Stramenopiles	Globisporangium ultimum (strain ATCC 200006 / CBS 805.95 / DAOM BR144)	K3WPP3	K3WPP3_GLOUD	dom1_400_610
Q9NW15	ANO10 (TMEM16K)	CaCC	Chloride channels	dom1_401_577	Ortholog	UP000000759	556484	Eukaryota	Stramenopiles	Phaeodactylum tricornutum (strain CCAP 1055/1)	B7G411	B7G411_PHATC	dom1_469_666
Q9NW15	ANO10 (TMEM16K)	CaCC	Chloride channels	dom1_401_577	Ortholog	UP000006643	403677	Eukaryota	Stramenopiles	Phytophthora infestans (strain T30-4)	D0MXY8	D0MXY8_PHYIT	dom1_413_623
Q9NW15	ANO10 (TMEM16K)	CaCC	Chloride channels	dom1_401_577	Ortholog	UP000005238	164328	Eukaryota	Stramenopiles	Phytophthora ramorum	H3GVK8	H3GVK8_PHYRM	dom1_418_628
Q9NW15	ANO10 (TMEM16K)	CaCC	Chloride channels	dom1_401_577	Ortholog	UP000002640	1094619	Eukaryota	Stramenopiles	Phytophthora sojae (strain P6497)	G4YHA3	G4YHA3_PHYSP	dom1_415_625
Q9NW15	ANO10 (TMEM16K)	CaCC	Chloride channels	dom1_401_577	Ortholog	UP000030762	1156394	Eukaryota	Stramenopiles	Saprolegnia diclina (strain VS20)	T0QC81	T0QC81_SAPDV	dom1_429_633
Q9NW15	ANO10 (TMEM16K)	CaCC	Chloride channels	dom1_401_577	Ortholog	UP000030745	695850	Eukaryota	Stramenopiles	Saprolegnia parasitica (strain CBS 223.65)	A0A067BMS5	A0A067BMS5_SAPPC	dom1_431_635
Q9NW15	ANO10 (TMEM16K)	CaCC	Chloride channels	dom1_401_577	Ortholog	UP000266841	159749	Eukaryota	Stramenopiles	Thalassiosira oceanica	K0T0V0	K0T0V0_THAOC	dom1_451_630
Q9NW15	ANO10 (TMEM16K)	CaCC	Chloride channels	dom1_401_577	Ortholog	UP000001449	35128	Eukaryota	Stramenopiles	Thalassiosira pseudonana	B8C6T3	B8C6T3_THAPS	dom1_439_620
Q9NW15	ANO10 (TMEM16K)	CaCC	Chloride channels	dom1_401_577	Ortholog	UP000241394	1590841	Eukaryota	Streptophytes	Actinidia chinensis var. chinensis	A0A2R6QFH8	A0A2R6QFH8_ACTCC	dom1_397_587
Q9NW15	ANO10 (TMEM16K)	CaCC	Chloride channels	dom1_401_577	Co-ortholog	UP000241394	1590841	Eukaryota	Streptophytes	Actinidia chinensis var. chinensis	A0A2R6R090	A0A2R6R090_ACTCC	dom1_396_586
Q9NW15	ANO10 (TMEM16K)	CaCC	Chloride channels	dom1_401_577	Ortholog	UP000015105	200361	Eukaryota	Streptophytes	Aegilops tauschii subsp. strangulata	A0A453F9I1	A0A453F9I1_AEGTS	dom1_385_574
Q9NW15	ANO10 (TMEM16K)	CaCC	Chloride channels	dom1_401_577	Ortholog	UP000017836	13333	Eukaryota	Streptophytes	Amborella trichopoda	U5CZ06	U5CZ06_AMBTC	dom1_400_590
Q9NW15	ANO10 (TMEM16K)	CaCC	Chloride channels	dom1_401_577	Ortholog	UP000006548	3702	Eukaryota	Streptophytes	Arabidopsis thaliana	A0MFS9	CACLC_ARATH	dom1_393_582
Q9NW15	ANO10 (TMEM16K)	CaCC	Chloride channels	dom1_401_577	Ortholog	UP000029120	50452	Eukaryota	Streptophytes	Arabis alpina	A0A087HHZ0	A0A087HHZ0_ARAAL	dom1_394_583
Q9NW15	ANO10 (TMEM16K)	CaCC	Chloride channels	dom1_401_577	Ortholog	UP000243459	4686	Eukaryota	Streptophytes	Asparagus officinalis	A0A5P1EVE0	A0A5P1EVE0_ASPOF	dom1_389_578
Q9NW15	ANO10 (TMEM16K)	CaCC	Chloride channels	dom1_401_577	Ortholog	UP000008810	15368	Eukaryota	Streptophytes	Brachypodium distachyon	A0A0Q3IUJ7	A0A0Q3IUJ7_BRADI	dom1_395_594
Q9NW15	ANO10 (TMEM16K)	CaCC	Chloride channels	dom1_401_577	Ortholog	UP000028999	3708	Eukaryota	Streptophytes	Brassica napus	A0A078J650	A0A078J650_BRANA	dom1_394_583
Q9NW15	ANO10 (TMEM16K)	CaCC	Chloride channels	dom1_401_577	Ortholog	UP000075243	3821	Eukaryota	Streptophytes	Cajanus cajan	A0A151SH48	A0A151SH48_CAJCA	dom1_394_582
Q9NW15	ANO10 (TMEM16K)	CaCC	Chloride channels	dom1_401_577	Ortholog	UP000583929	3483	Eukaryota	Streptophytes	Cannabis sativa	A0A7J6HUP6	A0A7J6HUP6_CANSA	dom1_398_577
Q9NW15	ANO10 (TMEM16K)	CaCC	Chloride channels	dom1_401_577	Ortholog	UP000222542	4072	Eukaryota	Streptophytes	Capsicum annuum	A0A2G2XVZ3	A0A2G2XVZ3_CAPAN	dom1_471_661
Q9NW15	ANO10 (TMEM16K)	CaCC	Chloride channels	dom1_401_577	Ortholog	UP000265515	69332	Eukaryota	Streptophytes	Chara braunii	A0A388ME16	A0A388ME16_CHABU	dom1_487_678
Q9NW15	ANO10 (TMEM16K)	CaCC	Chloride channels	dom1_401_577	Ortholog	UP000030687	85681	Eukaryota	Streptophytes	Citrus clementina	V4RXQ9	V4RXQ9_CITCL	dom1_394_584
Q9NW15	ANO10 (TMEM16K)	CaCC	Chloride channels	dom1_401_577	Ortholog	UP000295252	49390	Eukaryota	Streptophytes	Coffea canephora	A0A068TPG7	A0A068TPG7_COFCA	dom1_401_588
Q9NW15	ANO10 (TMEM16K)	CaCC	Chloride channels	dom1_401_577	Ortholog	UP000188268	210143	Eukaryota	Streptophytes	Corchorus capsularis	A0A1R3HKT6	A0A1R3HKT6_COCAP	dom1_395_584
Q9NW15	ANO10 (TMEM16K)	CaCC	Chloride channels	dom1_401_577	Ortholog	UP000029981	3659	Eukaryota	Streptophytes	Cucumis sativus	A0A0A0K7X3	A0A0A0K7X3_CUCSA	dom1_393_582
Q9NW15	ANO10 (TMEM16K)	CaCC	Chloride channels	dom1_401_577	Ortholog	UP000077755	79200	Eukaryota	Streptophytes	Daucus carota subsp. sativus	A0A175YCT2	A0A175YCT2_DAUCS	dom1_345_519
Q9NW15	ANO10 (TMEM16K)	CaCC	Chloride channels	dom1_401_577	Ortholog	UP000030748	4155	Eukaryota	Streptophytes	Erythranthe guttata	A0A022Q024	A0A022Q024_ERYGU	dom1_384_580
Q9NW15	ANO10 (TMEM16K)	CaCC	Chloride channels	dom1_401_577	Ortholog	UP000030689	72664	Eukaryota	Streptophytes	Eutrema salsugineum	V4KKS5	V4KKS5_EUTSA	dom1_394_583
Q9NW15	ANO10 (TMEM16K)	CaCC	Chloride channels	dom1_401_577	Ortholog	UP000008827	3847	Eukaryota	Streptophytes	Glycine max	I1KUY0	I1KUY0_SOYBN	dom1_394_582
Q9NW15	ANO10 (TMEM16K)	CaCC	Chloride channels	dom1_401_577	Co-ortholog	UP000008827	3847	Eukaryota	Streptophytes	Glycine max	I1KGF8	I1KGF8_SOYBN	dom1_394_582
Q9NW15	ANO10 (TMEM16K)	CaCC	Chloride channels	dom1_401_577	Ortholog	UP000189702	3635	Eukaryota	Streptophytes	Gossypium hirsutum	A0A1U8KF29	A0A1U8KF29_GOSHI	dom1_394_583
Q9NW15	ANO10 (TMEM16K)	CaCC	Chloride channels	dom1_401_577	Ortholog	UP000032304	29730	Eukaryota	Streptophytes	Gossypium raimondii	A0A0D2UNR4	A0A0D2UNR4_GOSRA	dom1_394_583
Q9NW15	ANO10 (TMEM16K)	CaCC	Chloride channels	dom1_401_577	Ortholog	UP000011116	112509	Eukaryota	Streptophytes	Hordeum vulgare subsp. vulgare	A0A8I6X2S7	A0A8I6X2S7_HORVV	dom1_403_593
Q9NW15	ANO10 (TMEM16K)	CaCC	Chloride channels	dom1_401_577	Ortholog	UP000091857	3983	Eukaryota	Streptophytes	Manihot esculenta	A0A251JRQ5	A0A251JRQ5_MANES	dom1_394_584
Q9NW15	ANO10 (TMEM16K)	CaCC	Chloride channels	dom1_401_577	Ortholog	UP000244005	3197	Eukaryota	Streptophytes	Marchantia polymorpha	A0A2R6XS77	A0A2R6XS77_MARPO	dom1_427_620
Q9NW15	ANO10 (TMEM16K)	CaCC	Chloride channels	dom1_401_577	Ortholog	UP000002051	3880	Eukaryota	Streptophytes	Medicago truncatula	A0A072TM33	A0A072TM33_MEDTR	dom1_393_582
Q9NW15	ANO10 (TMEM16K)	CaCC	Chloride channels	dom1_401_577	Ortholog	UP000012960	214687	Eukaryota	Streptophytes	Musa acuminata subsp. malaccensis	A0A804IGU0	A0A804IGU0_MUSAM	dom1_390_579
Q9NW15	ANO10 (TMEM16K)	CaCC	Chloride channels	dom1_401_577	Ortholog	UP000187609	49451	Eukaryota	Streptophytes	Nicotiana attenuata	A0A1J6IWX3	A0A1J6IWX3_NICAT	dom1_401_591
Q9NW15	ANO10 (TMEM16K)	CaCC	Chloride channels	dom1_401_577	Ortholog	UP000084051	4097	Eukaryota	Streptophytes	Nicotiana tabacum	A0A1S4BT06	A0A1S4BT06_TOBAC	dom1_401_591
Q9NW15	ANO10 (TMEM16K)	CaCC	Chloride channels	dom1_401_577	Ortholog	UP000006038	4533	Eukaryota	Streptophytes	Oryza brachyantha	J3L3B9	J3L3B9_ORYBR	dom1_406_597
Q9NW15	ANO10 (TMEM16K)	CaCC	Chloride channels	dom1_401_577	Ortholog	UP000006591	4536	Eukaryota	Streptophytes	Oryza nivara	A0A0E0FRX1	A0A0E0FRX1_ORYNI	dom1_405_601
Q9NW15	ANO10 (TMEM16K)	CaCC	Chloride channels	dom1_401_577	Ortholog	UP000026962	4537	Eukaryota	Streptophytes	Oryza punctata	A0A0E0JN10	A0A0E0JN10_ORYPU	dom1_404_587
Q9NW15	ANO10 (TMEM16K)	CaCC	Chloride channels	dom1_401_577	Ortholog	UP000008022	4529	Eukaryota	Streptophytes	Oryza rufipogon	A0A0E0N1F5	A0A0E0N1F5_ORYRU	dom1_405_592
Q9NW15	ANO10 (TMEM16K)	CaCC	Chloride channels	dom1_401_577	Ortholog	UP000007015	39946	Eukaryota	Streptophytes	Oryza sativa subsp. indica	B8A8C0	B8A8C0_ORYSI	dom1_413_543
Q9NW15	ANO10 (TMEM16K)	CaCC	Chloride channels	dom1_401_577	Ortholog	UP000059680	39947	Eukaryota	Streptophytes	Oryza sativa subsp. japonica	Q0JJZ6	CACLC_ORYSJ	dom1_405_595
Q9NW15	ANO10 (TMEM16K)	CaCC	Chloride channels	dom1_401_577	Ortholog	UP000316621	3469	Eukaryota	Streptophytes	Papaver somniferum	A0A4Y7IV91	A0A4Y7IV91_PAPSO	dom1_400_600
Q9NW15	ANO10 (TMEM16K)	CaCC	Chloride channels	dom1_401_577	Ortholog	UP000053144	3914	Eukaryota	Streptophytes	Phaseolus angularis	A0A0L9TA23	A0A0L9TA23_PHAAN	dom1_394_582
Q9NW15	ANO10 (TMEM16K)	CaCC	Chloride channels	dom1_401_577	Ortholog	UP000000226	3885	Eukaryota	Streptophytes	Phaseolus vulgaris	V7ASI8	V7ASI8_PHAVU	dom1_394_582
Q9NW15	ANO10 (TMEM16K)	CaCC	Chloride channels	dom1_401_577	Ortholog	UP000006727	3218	Eukaryota	Streptophytes	Physcomitrium patens	A0A2K1KCL4	A0A2K1KCL4_PHYPA	dom1_397_595
Q9NW15	ANO10 (TMEM16K)	CaCC	Chloride channels	dom1_401_577	Ortholog	UP000327085	3755	Eukaryota	Streptophytes	Prunus dulcis	A0A5E4F8E8	A0A5E4F8E8_PRUDU	dom1_392_581
Q9NW15	ANO10 (TMEM16K)	CaCC	Chloride channels	dom1_401_577	Ortholog	UP000006882	3760	Eukaryota	Streptophytes	Prunus persica	A0A251PVQ2	A0A251PVQ2_PRUPE	dom1_569_758
Q9NW15	ANO10 (TMEM16K)	CaCC	Chloride channels	dom1_401_577	Ortholog	UP000594261	97700	Eukaryota	Streptophytes	Quercus lobata	A0A7N2LLB2	A0A7N2LLB2_QUELO	dom1_394_583
Q9NW15	ANO10 (TMEM16K)	CaCC	Chloride channels	dom1_401_577	Co-ortholog	UP000594261	97700	Eukaryota	Streptophytes	Quercus lobata	A0A7N2LNS5	A0A7N2LNS5_QUELO	dom1_394_583
Q9NW15	ANO10 (TMEM16K)	CaCC	Chloride channels	dom1_401_577	Ortholog	UP000238479	74649	Eukaryota	Streptophytes	Rosa chinensis	A0A2P6RXS7	A0A2P6RXS7_ROSCH	dom1_393_582
Q9NW15	ANO10 (TMEM16K)	CaCC	Chloride channels	dom1_401_577	Ortholog	UP000004995	4555	Eukaryota	Streptophytes	Setaria italica	K3XFC7	K3XFC7_SETIT	dom1_398_588
Q9NW15	ANO10 (TMEM16K)	CaCC	Chloride channels	dom1_401_577	Ortholog	UP000298652	4556	Eukaryota	Streptophytes	Setaria viridis	A0A4U6UPI1	A0A4U6UPI1_SETVI	dom1_483_673
Q9NW15	ANO10 (TMEM16K)	CaCC	Chloride channels	dom1_401_577	Ortholog	UP000004994	4081	Eukaryota	Streptophytes	Solanum lycopersicum	A0A3Q7FX87	A0A3Q7FX87_SOLLC	dom1_454_644
Q9NW15	ANO10 (TMEM16K)	CaCC	Chloride channels	dom1_401_577	Ortholog	UP000000768	4558	Eukaryota	Streptophytes	Sorghum bicolor	C5XHM9	C5XHM9_SORBI	dom1_397_587
Q9NW15	ANO10 (TMEM16K)	CaCC	Chloride channels	dom1_401_577	Ortholog	UP000026915	3641	Eukaryota	Streptophytes	Theobroma cacao	A0A061GIY9	A0A061GIY9_THECC	dom1_394_583
Q9NW15	ANO10 (TMEM16K)	CaCC	Chloride channels	dom1_401_577	Ortholog	UP000015106	4572	Eukaryota	Streptophytes	Triticum urartu	A0A8R7TX44	A0A8R7TX44_TRIUA	dom1_332_522
Q9NW15	ANO10 (TMEM16K)	CaCC	Chloride channels	dom1_401_577	Ortholog	UP000009183	29760	Eukaryota	Streptophytes	Vitis vinifera	D7U040	D7U040_VITVI	dom1_394_584
Q9NW15	ANO10 (TMEM16K)	CaCC	Chloride channels	dom1_401_577	Ortholog	UP000007305	4577	Eukaryota	Streptophytes	Zea mays	C0P737	C0P737_MAIZE	dom1_396_586
Q9NW15	ANO10 (TMEM16K)	CaCC	Chloride channels	dom1_401_577	Ortholog	UP000036987	29655	Eukaryota	Streptophytes	Zostera marina	A0A0K9NQD1	A0A0K9NQD1_ZOSMR	dom1_385_574
Q9NW15	ANO10 (TMEM16K)	CaCC	Chloride channels	dom1_401_577	Ortholog	UP000008144	7719	Eukaryota	Tunicates	Ciona intestinalis	F6XJF3	F6XJF3_CIOIN	dom1_399_585
Q9NW15	ANO10 (TMEM16K)	CaCC	Chloride channels	dom1_401_577	Ortholog	UP000007875	51511	Eukaryota	Tunicates	Ciona savignyi	H2YH04	H2YH04_CIOSA	dom1_392_583
Q9NW15	ANO10 (TMEM16K)	CaCC	Chloride channels	dom1_381_577	Ortholog	UP000293923	2250255	Archaea	Archaea	Methanosarcinales archaeon	A0A482QZW1	A0A482QZW1_9EURY	dom1_532_716
Q9NQ90	ANO2 (C12orf3, TMEM16B)	CaCC	Chloride channels	dom1_603_962	Ortholog	UP000186698	8355	Eukaryota	Amphibians	Xenopus laevis	A0A8J0UQ16	A0A8J0UQ16_XENLA	dom1_695_1068
Q9NQ90	ANO2 (C12orf3, TMEM16B)	CaCC	Chloride channels	dom1_603_962	Ortholog	UP000008143	8364	Eukaryota	Amphibians	Xenopus tropicalis	A0A8J0SSS8	A0A8J0SSS8_XENTR	dom1_684_1066
Q9NQ90	ANO2 (C12orf3, TMEM16B)	CaCC	Chloride channels	dom1_603_962	Ortholog	UP000000673	43151	Eukaryota	Arthropods	Anopheles darlingi	W5JDY9	W5JDY9_ANODA	dom1_475_833
Q9NQ90	ANO2 (C12orf3, TMEM16B)	CaCC	Chloride channels	dom1_603_962	Ortholog	UP000007062	7165	Eukaryota	Arthropods	Anopheles gambiae	Q7QEP9	Q7QEP9_ANOGA	dom1_617_976
Q9NQ90	ANO2 (C12orf3, TMEM16B)	CaCC	Chloride channels	dom1_603_962	Ortholog	UP000030765	74873	Eukaryota	Arthropods	Anopheles sinensis	A0A084WPM2	A0A084WPM2_ANOSI	dom1_874_1232
Q9NQ90	ANO2 (C12orf3, TMEM16B)	CaCC	Chloride channels	dom1_603_962	Ortholog	UP000076408	30069	Eukaryota	Arthropods	Anopheles stephensi	A0A182YCQ0	A0A182YCQ0_ANOST	dom1_701_1059
Q9NQ90	ANO2 (C12orf3, TMEM16B)	CaCC	Chloride channels	dom1_603_962	Ortholog	UP000002320	7176	Eukaryota	Arthropods	Culex quinquefasciatus	B0XDV5	B0XDV5_CULQU	dom1_466_825
Q9NQ90	ANO2 (C12orf3, TMEM16B)	CaCC	Chloride channels	dom1_603_962	Ortholog	UP000296049	8839	Eukaryota	Birds	Anas platyrhynchos	R0LL33	R0LL33_ANAPL	dom1_520_905
Q9NQ90	ANO2 (C12orf3, TMEM16B)	CaCC	Chloride channels	dom1_603_962	Ortholog	UP000472269	194338	Eukaryota	Birds	Athene cunicularia	A0A663LYG4	A0A663LYG4_ATHCN	dom1_621_1016
Q9NQ90	ANO2 (C12orf3, TMEM16B)	CaCC	Chloride channels	dom1_603_962	Ortholog	UP000603793	1196302	Eukaryota	Birds	Corvus moneduloides	A0A851WTA7	A0A851WTA7_CORMO	dom1_561_956
Q9NQ90	ANO2 (C12orf3, TMEM16B)	CaCC	Chloride channels	dom1_603_962	Ortholog	UP000694408	40217	Eukaryota	Birds	Junco hyemalis	A0A8C5J3F1	A0A8C5J3F1_JUNHY	dom1_573_972
Q9NQ90	ANO2 (C12orf3, TMEM16B)	CaCC	Chloride channels	dom1_603_962	Ortholog	UP000472266	2489341	Eukaryota	Birds	Strigops habroptila	A0A672URQ3	A0A672URQ3_STRHB	dom1_534_906
Q9NQ90	ANO2 (C12orf3, TMEM16B)	CaCC	Chloride channels	dom1_603_962	Ortholog	UP000233020	37293	Eukaryota	Mammals	Aotus nancymaae	A0A2K5C0D9	A0A2K5C0D9_AOTNA	dom1_560_968
Q9NQ90	ANO2 (C12orf3, TMEM16B)	CaCC	Chloride channels	dom1_603_962	Ortholog	UP000694857	9771	Eukaryota	Mammals	Balaenoptera musculus	A0A8B8YGM9	A0A8B8YGM9_BALMU	dom1_600_1001
Q9NQ90	ANO2 (C12orf3, TMEM16B)	CaCC	Chloride channels	dom1_603_962	Ortholog	UP000314981	30522	Eukaryota	Mammals	Bos indicus x Bos taurus	A0A4W2DYK6	A0A4W2DYK6_BOBOX	dom1_617_1000
Q9NQ90	ANO2 (C12orf3, TMEM16B)	CaCC	Chloride channels	dom1_603_962	Ortholog	UP000009136	9913	Eukaryota	Mammals	Bos taurus	F1N0S4	F1N0S4_BOVIN	dom1_593_994
Q9NQ90	ANO2 (C12orf3, TMEM16B)	CaCC	Chloride channels	dom1_603_962	Ortholog	UP000008225	9483	Eukaryota	Mammals	Callithrix jacchus	F7AK56	F7AK56_CALJA	dom1_603_962
Q9NQ90	ANO2 (C12orf3, TMEM16B)	CaCC	Chloride channels	dom1_603_962	Ortholog	UP000002254	9615	Eukaryota	Mammals	Canis lupus familiaris	A0A8I3QA03	A0A8I3QA03_CANLF	dom1_597_992
Q9NQ90	ANO2 (C12orf3, TMEM16B)	CaCC	Chloride channels	dom1_603_962	Ortholog	UP000291000	9925	Eukaryota	Mammals	Capra hircus	A0A452EU86	A0A452EU86_CAPHI	dom1_585_968
Q9NQ90	ANO2 (C12orf3, TMEM16B)	CaCC	Chloride channels	dom1_603_962	Ortholog	UP000189704	1868482	Eukaryota	Mammals	Carlito syrichta	A0A3Q0ED20	A0A3Q0ED20_CARSF	dom1_513_914
Q9NQ90	ANO2 (C12orf3, TMEM16B)	CaCC	Chloride channels	dom1_603_962	Ortholog	UP000005447	10141	Eukaryota	Mammals	Cavia porcellus	H0UV06	H0UV06_CAVPO	dom1_602_961
Q9NQ90	ANO2 (C12orf3, TMEM16B)	CaCC	Chloride channels	dom1_603_962	Ortholog	UP000233040	2715852	Eukaryota	Mammals	Cebus imitator	A0A2K5PYZ9	A0A2K5PYZ9_CEBIM	dom1_599_958
Q9NQ90	ANO2 (C12orf3, TMEM16B)	CaCC	Chloride channels	dom1_603_962	Ortholog	UP000233060	9531	Eukaryota	Mammals	Cercocebus atys	A0A2K5LPZ3	A0A2K5LPZ3_CERAT	dom1_599_961
Q9NQ90	ANO2 (C12orf3, TMEM16B)	CaCC	Chloride channels	dom1_603_962	Ortholog	UP000694398	34839	Eukaryota	Mammals	Chinchilla lanigera	A0A8C2VYH3	A0A8C2VYH3_CHILA	dom1_602_1003
Q9NQ90	ANO2 (C12orf3, TMEM16B)	CaCC	Chloride channels	dom1_603_962	Ortholog	UP000029965	60711	Eukaryota	Mammals	Chlorocebus sabaeus	A0A0D9REI6	A0A0D9REI6_CHLSB	dom1_601_960
Q9NQ90	ANO2 (C12orf3, TMEM16B)	CaCC	Chloride channels	dom1_603_962	Ortholog	UP000233080	336983	Eukaryota	Mammals	Colobus angolensis palliatus	A0A2K5I6M1	A0A2K5I6M1_COLAP	dom1_543_902
Q9NQ90	ANO2 (C12orf3, TMEM16B)	CaCC	Chloride channels	dom1_603_962	Ortholog	UP000001075	10029	Eukaryota	Mammals	Cricetulus griseus	G3GUL3	G3GUL3_CRIGR	dom1_3169_3591
Q9NQ90	ANO2 (C12orf3, TMEM16B)	CaCC	Chloride channels	dom1_603_962	Ortholog	UP000081671	10020	Eukaryota	Mammals	Dipodomys ordii	A0A1S3FR45	A0A1S3FR45_DIPOR	dom1_562_923
Q9NQ90	ANO2 (C12orf3, TMEM16B)	CaCC	Chloride channels	dom1_603_962	Ortholog	UP000002281	9796	Eukaryota	Mammals	Equus caballus	A0A3Q2HLC3	A0A3Q2HLC3_HORSE	dom1_603_969
Q9NQ90	ANO2 (C12orf3, TMEM16B)	CaCC	Chloride channels	dom1_603_962	Ortholog	UP000079721	9365	Eukaryota	Mammals	Erinaceus europaeus	A0A1S3A1I9	A0A1S3A1I9_ERIEU	dom1_600_959
Q9NQ90	ANO2 (C12orf3, TMEM16B)	CaCC	Chloride channels	dom1_603_962	Ortholog	UP000011712	9685	Eukaryota	Mammals	Felis catus	M3W6M2	M3W6M2_FELCA	dom1_605_964
Q9NQ90	ANO2 (C12orf3, TMEM16B)	CaCC	Chloride channels	dom1_603_962	Ortholog	UP000001519	9595	Eukaryota	Mammals	Gorilla gorilla gorilla	G3S4A1	G3S4A1_GORGO	dom1_599_958
Q9NQ90	ANO2 (C12orf3, TMEM16B)	CaCC	Chloride channels	dom1_603_962	Ortholog	UP000006813	10181	Eukaryota	Mammals	Heterocephalus glaber	G5CAN5	G5CAN5_HETGA	dom1_591_951
Q9NQ90	ANO2 (C12orf3, TMEM16B)	CaCC	Chloride channels	dom1_603_962	Ortholog	UP000005215	43179	Eukaryota	Mammals	Ictidomys tridecemlineatus	I3N9Q0	I3N9Q0_ICTTR	dom1_602_966
Q9NQ90	ANO2 (C12orf3, TMEM16B)	CaCC	Chloride channels	dom1_603_962	Ortholog	UP000694385	51337	Eukaryota	Mammals	Jaculus jaculus	A0A8C5NV60	A0A8C5NV60_JACJA	dom1_600_966
Q9NQ90	ANO2 (C12orf3, TMEM16B)	CaCC	Chloride channels	dom1_603_962	Ortholog	UP000007646	9785	Eukaryota	Mammals	Loxodonta africana	G3UKA8	G3UKA8_LOXAF	dom1_513_914
Q9NQ90	ANO2 (C12orf3, TMEM16B)	CaCC	Chloride channels	dom1_603_962	Ortholog	UP000233100	9541	Eukaryota	Mammals	Macaca fascicularis	A0A2K5VRH0	A0A2K5VRH0_MACFA	dom1_602_960
Q9NQ90	ANO2 (C12orf3, TMEM16B)	CaCC	Chloride channels	dom1_603_962	Ortholog	UP000233120	9545	Eukaryota	Mammals	Macaca nemestrina	A0A2K6C070	A0A2K6C070_MACNE	dom1_599_957
Q9NQ90	ANO2 (C12orf3, TMEM16B)	CaCC	Chloride channels	dom1_603_962	Ortholog	UP000233140	9568	Eukaryota	Mammals	Mandrillus leucophaeus	A0A2K5Z7V1	A0A2K5Z7V1_MANLE	dom1_412_771
Q9NQ90	ANO2 (C12orf3, TMEM16B)	CaCC	Chloride channels	dom1_603_962	Ortholog	UP000694394	30608	Eukaryota	Mammals	Microcebus murinus	A0A8C5UU56	A0A8C5UU56_MICMU	dom1_591_989
Q9NQ90	ANO2 (C12orf3, TMEM16B)	CaCC	Chloride channels	dom1_603_962	Ortholog	UP000002280	13616	Eukaryota	Mammals	Monodelphis domestica	F7AKG3	F7AKG3_MONDO	dom1_500_877
Q9NQ90	ANO2 (C12orf3, TMEM16B)	CaCC	Chloride channels	dom1_603_962	Ortholog	UP000000589	10090	Eukaryota	Mammals	Mus musculus	Q8CFW1	ANO2_MOUSE	dom1_601_1002
Q9NQ90	ANO2 (C12orf3, TMEM16B)	CaCC	Chloride channels	dom1_603_962	Ortholog	UP000000715	9669	Eukaryota	Mammals	Mustela putorius furo	A0A8U0RNF3	A0A8U0RNF3_MUSPF	dom1_615_1013
Q9NQ90	ANO2 (C12orf3, TMEM16B)	CaCC	Chloride channels	dom1_603_962	Ortholog	UP000001074	59463	Eukaryota	Mammals	Myotis lucifugus	G1PTK7	G1PTK7_MYOLU	dom1_323_682
Q9NQ90	ANO2 (C12orf3, TMEM16B)	CaCC	Chloride channels	dom1_603_962	Ortholog	UP000694381	1026970	Eukaryota	Mammals	Nannospalax galili	A0A8C6QLV2	A0A8C6QLV2_NANGA	dom1_601_1002
Q9NQ90	ANO2 (C12orf3, TMEM16B)	CaCC	Chloride channels	dom1_603_962	Ortholog	UP000001073	61853	Eukaryota	Mammals	Nomascus leucogenys	G1QSW4	G1QSW4_NOMLE	dom1_556_915
Q9NQ90	ANO2 (C12orf3, TMEM16B)	CaCC	Chloride channels	dom1_603_962	Ortholog	UP000515203	10160	Eukaryota	Mammals	Octodon degus	A0A6P3VDN6	A0A6P3VDN6_OCTDE	dom1_600_1001
Q9NQ90	ANO2 (C12orf3, TMEM16B)	CaCC	Chloride channels	dom1_603_962	Ortholog	UP000002279	9258	Eukaryota	Mammals	Ornithorhynchus anatinus	A0A6I8NW65	A0A6I8NW65_ORNAN	dom1_575_936
Q9NQ90	ANO2 (C12orf3, TMEM16B)	CaCC	Chloride channels	dom1_603_962	Ortholog	UP000001811	9986	Eukaryota	Mammals	Oryctolagus cuniculus	G1SRP3	G1SRP3_RABIT	dom1_400_676
Q9NQ90	ANO2 (C12orf3, TMEM16B)	CaCC	Chloride channels	dom1_603_962	Ortholog	UP000005225	30611	Eukaryota	Mammals	Otolemur garnettii	H0WT64	H0WT64_OTOGA	dom1_428_826
Q9NQ90	ANO2 (C12orf3, TMEM16B)	CaCC	Chloride channels	dom1_603_962	Ortholog	UP000002356	9940	Eukaryota	Mammals	Ovis aries	W5PGM7	W5PGM7_SHEEP	dom1_591_974
Q9NQ90	ANO2 (C12orf3, TMEM16B)	CaCC	Chloride channels	dom1_603_962	Ortholog	UP000240080	9597	Eukaryota	Mammals	Pan paniscus	A0A2R9A8K2	A0A2R9A8K2_PANPA	dom1_599_958
Q9NQ90	ANO2 (C12orf3, TMEM16B)	CaCC	Chloride channels	dom1_603_962	Ortholog	UP000002277	9598	Eukaryota	Mammals	Pan troglodytes	A0A2I3SV02	A0A2I3SV02_PANTR	dom1_599_958
Q9NQ90	ANO2 (C12orf3, TMEM16B)	CaCC	Chloride channels	dom1_603_962	Ortholog	UP000515140	38626	Eukaryota	Mammals	Phascolarctos cinereus	A0A6P5L2W7	A0A6P5L2W7_PHACI	dom1_515_909
Q9NQ90	ANO2 (C12orf3, TMEM16B)	CaCC	Chloride channels	dom1_603_962	Ortholog	UP000001595	9601	Eukaryota	Mammals	Pongo abelii	A0A8I5TXF3	A0A8I5TXF3_PONAB	dom1_603_962
Q9NQ90	ANO2 (C12orf3, TMEM16B)	CaCC	Chloride channels	dom1_603_962	Ortholog	UP000233160	379532	Eukaryota	Mammals	Propithecus coquereli	A0A2K6F7K3	A0A2K6F7K3_PROCO	dom1_605_1005
Q9NQ90	ANO2 (C12orf3, TMEM16B)	CaCC	Chloride channels	dom1_603_962	Ortholog	UP000515202	132908	Eukaryota	Mammals	Pteropus vampyrus	A0A6P3QHF8	A0A6P3QHF8_PTEVA	dom1_535_936
Q9NQ90	ANO2 (C12orf3, TMEM16B)	CaCC	Chloride channels	dom1_603_962	Ortholog	UP000472240	59479	Eukaryota	Mammals	Rhinolophus ferrumequinum	A0A671DT01	A0A671DT01_RHIFE	dom1_603_1004
Q9NQ90	ANO2 (C12orf3, TMEM16B)	CaCC	Chloride channels	dom1_603_962	Ortholog	UP000233180	61621	Eukaryota	Mammals	Rhinopithecus bieti	A0A2K6L3T5	A0A2K6L3T5_RHIBE	dom1_598_957
Q9NQ90	ANO2 (C12orf3, TMEM16B)	CaCC	Chloride channels	dom1_603_962	Ortholog	UP000233200	61622	Eukaryota	Mammals	Rhinopithecus roxellana	A0A2K6QRB1	A0A2K6QRB1_RHIRO	dom1_598_957
Q9NQ90	ANO2 (C12orf3, TMEM16B)	CaCC	Chloride channels	dom1_603_962	Ortholog	UP000233220	39432	Eukaryota	Mammals	Saimiri boliviensis boliviensis	A0A2K6UFI7	A0A2K6UFI7_SAIBB	dom1_597_956
Q9NQ90	ANO2 (C12orf3, TMEM16B)	CaCC	Chloride channels	dom1_603_962	Ortholog	UP000007648	9305	Eukaryota	Mammals	Sarcophilus harrisii	A0A7N4NPD3	A0A7N4NPD3_SARHA	dom1_618_1017
Q9NQ90	ANO2 (C12orf3, TMEM16B)	CaCC	Chloride channels	dom1_603_962	Ortholog	UP000472268	37032	Eukaryota	Mammals	Suricata suricatta	A0A673TUB9	A0A673TUB9_SURSU	dom1_605_964
Q9NQ90	ANO2 (C12orf3, TMEM16B)	CaCC	Chloride channels	dom1_603_962	Ortholog	UP000245320	9739	Eukaryota	Mammals	Tursiops truncatus	A0A6J3S7L9	A0A6J3S7L9_TURTR	dom1_598_977
Q9NQ90	ANO2 (C12orf3, TMEM16B)	CaCC	Chloride channels	dom1_603_962	Ortholog	UP000261680	29073	Eukaryota	Mammals	Ursus maritimus	A0A8M1H3K3	A0A8M1H3K3_URSMA	dom1_697_1095
Q9NQ90	ANO2 (C12orf3, TMEM16B)	CaCC	Chloride channels	dom1_603_962	Ortholog	UP000504605	30538	Eukaryota	Mammals	Vicugna pacos	A0A6J2ZWU4	A0A6J2ZWU4_VICPA	dom1_593_947
Q9NQ90	ANO2 (C12orf3, TMEM16B)	CaCC	Chloride channels	dom1_603_962	Ortholog	UP000314987	29139	Eukaryota	Mammals	Vombatus ursinus	A0A4X2LPN8	A0A4X2LPN8_VOMUR	dom1_583_943
Q9NQ90	ANO2 (C12orf3, TMEM16B)	CaCC	Chloride channels	dom1_603_962	Ortholog	UP000694404	106734	Eukaryota	Reptiles	Chelonoidis abingdonii	A0A8C0H1I5	A0A8C0H1I5_CHEAB	dom1_526_908
Q9NQ90	ANO2 (C12orf3, TMEM16B)	CaCC	Chloride channels	dom1_603_962	Ortholog	UP000694380	8478	Eukaryota	Reptiles	Chrysemys picta bellii	A0A8C3FLD3	A0A8C3FLD3_CHRPI	dom1_520_902
Q9NQ90	ANO2 (C12orf3, TMEM16B)	CaCC	Chloride channels	dom1_603_962	Ortholog	UP000594220	8502	Eukaryota	Reptiles	Crocodylus porosus	A0A7M4DV92	A0A7M4DV92_CROPO	dom1_547_929
Q9NQ90	ANO2 (C12orf3, TMEM16B)	CaCC	Chloride channels	dom1_603_962	Ortholog	UP000472272	64176	Eukaryota	Reptiles	Podarcis muralis	A0A670HZF7	A0A670HZF7_PODMU	dom1_546_928
Q9NQ90	ANO2 (C12orf3, TMEM16B)	CaCC	Chloride channels	dom1_603_962	Ortholog	UP000694421	96440	Eukaryota	Reptiles	Salvator merianae	A0A8D0KM48	A0A8D0KM48_SALMN	dom1_499_903
Q32M45	ANO4 (TMEM16D)	CaCC	Chloride channels	dom1_572_952	Ortholog	UP000008143	8364	Eukaryota	Amphibians	Xenopus tropicalis	F6ZLF5	F6ZLF5_XENTR	dom1_774_1154
Q32M45	ANO4 (TMEM16D)	CaCC	Chloride channels	dom1_572_952	Ortholog	UP000296049	8839	Eukaryota	Birds	Anas platyrhynchos	R0LBR7	R0LBR7_ANAPL	dom1_556_936
Q32M45	ANO4 (TMEM16D)	CaCC	Chloride channels	dom1_572_952	Ortholog	UP000603793	1196302	Eukaryota	Birds	Corvus moneduloides	A0A851WHW4	A0A851WHW4_CORMO	dom1_574_954
Q32M45	ANO4 (TMEM16D)	CaCC	Chloride channels	dom1_572_952	Ortholog	UP000694562	100819	Eukaryota	Birds	Falco tinnunculus	A0A8C4XJQ1	A0A8C4XJQ1_FALTI	dom1_639_1019
Q32M45	ANO4 (TMEM16D)	CaCC	Chloride channels	dom1_572_952	Ortholog	UP000016665	59894	Eukaryota	Birds	Ficedula albicollis	A0A803V5U2	A0A803V5U2_FICAL	dom1_661_1041
Q32M45	ANO4 (TMEM16D)	CaCC	Chloride channels	dom1_572_952	Ortholog	UP000694408	40217	Eukaryota	Birds	Junco hyemalis	A0A8C5JCV2	A0A8C5JCV2_JUNHY	dom1_569_949
Q32M45	ANO4 (TMEM16D)	CaCC	Chloride channels	dom1_572_952	Ortholog	UP000694405	13146	Eukaryota	Birds	Melopsittacus undulatus	A0A8V5G4S6	A0A8V5G4S6_MELUD	dom1_713_1093
Q32M45	ANO4 (TMEM16D)	CaCC	Chloride channels	dom1_572_952	Ortholog	UP000472261	9054	Eukaryota	Birds	Phasianus colchicus	A0A669PRL5	A0A669PRL5_PHACC	dom1_627_1007
Q32M45	ANO4 (TMEM16D)	CaCC	Chloride channels	dom1_572_952	Ortholog	UP000694409	9135	Eukaryota	Birds	Serinus canaria	A0A8C9MW63	A0A8C9MW63_SERCA	dom1_541_921
Q32M45	ANO4 (TMEM16D)	CaCC	Chloride channels	dom1_572_952	Ortholog	UP000472266	2489341	Eukaryota	Birds	Strigops habroptila	A0A672UQT1	A0A672UQT1_STRHB	dom1_690_1070
Q32M45	ANO4 (TMEM16D)	CaCC	Chloride channels	dom1_572_952	Ortholog	UP000007754	59729	Eukaryota	Birds	Taeniopygia guttata	A0A674HJG1	A0A674HJG1_TAEGU	dom1_1125_1505
Q32M45	ANO4 (TMEM16D)	CaCC	Chloride channels	dom1_572_952	Ortholog	UP000054190	56313	Eukaryota	Birds	Tyto alba	A0A093FU97	A0A093FU97_TYTAL	dom1_519_899
Q32M45	ANO4 (TMEM16D)	CaCC	Chloride channels	dom1_572_952	Ortholog	UP000257160	80972	Eukaryota	Fishes	Amphiprion ocellaris	A0A3Q1AX89	A0A3Q1AX89_AMPOC	dom1_704_1069
Q32M45	ANO4 (TMEM16D)	CaCC	Chloride channels	dom1_572_952	Ortholog	UP000265080	161767	Eukaryota	Fishes	Amphiprion percula	A0A3P8TWU1	A0A3P8TWU1_AMPPE	dom1_553_918
Q32M45	ANO4 (TMEM16D)	CaCC	Chloride channels	dom1_572_952	Ortholog	UP000265040	64144	Eukaryota	Fishes	Anabas testudineus	A0A7N6F780	A0A7N6F780_ANATE	dom1_655_1021
Q32M45	ANO4 (TMEM16D)	CaCC	Chloride channels	dom1_572_952	Ortholog	UP000314986	7868	Eukaryota	Fishes	Callorhinchus milii	A0A4W3IFM1	A0A4W3IFM1_CALMI	dom1_534_897
Q32M45	ANO4 (TMEM16D)	CaCC	Chloride channels	dom1_572_952	Ortholog	UP000287033	137246	Eukaryota	Fishes	Chiloscyllium punctatum	A0A401RWB9	A0A401RWB9_CHIPU	dom1_760_1123
Q32M45	ANO4 (TMEM16D)	CaCC	Chloride channels	dom1_572_952	Ortholog	UP000265120	244447	Eukaryota	Fishes	Cynoglossus semilaevis	A0A3P8WRU0	A0A3P8WRU0_CYNSE	dom1_505_872
Q32M45	ANO4 (TMEM16D)	CaCC	Chloride channels	dom1_572_952	Ortholog	UP000472264	173247	Eukaryota	Fishes	Echeneis naucrates	A0A665VBY1	A0A665VBY1_ECHNA	dom1_672_1037
Q32M45	ANO4 (TMEM16D)	CaCC	Chloride channels	dom1_572_952	Ortholog	UP000265140	8010	Eukaryota	Fishes	Esox lucius	A0A6Q2X4S2	A0A6Q2X4S2_ESOLU	dom1_657_1016
Q32M45	ANO4 (TMEM16D)	CaCC	Chloride channels	dom1_572_952	Ortholog	UP000694546	8049	Eukaryota	Fishes	Gadus morhua	A0A8C5FK79	A0A8C5FK79_GADMO	dom1_786_1167
Q32M45	ANO4 (TMEM16D)	CaCC	Chloride channels	dom1_572_952	Ortholog	UP000250572	33528	Eukaryota	Fishes	Gambusia affinis	A0A315V6X5	A0A315V6X5_GAMAF	dom1_977_1342
Q32M45	ANO4 (TMEM16D)	CaCC	Chloride channels	dom1_572_952	Ortholog	UP000007635	69293	Eukaryota	Fishes	Gasterosteus aculeatus	G3Q7C6	G3Q7C6_GASAC	dom1_537_916
Q32M45	ANO4 (TMEM16D)	CaCC	Chloride channels	dom1_572_952	Ortholog	UP000264800	37003	Eukaryota	Fishes	Kryptolebias marmoratus	A0A3Q3BEX8	A0A3Q3BEX8_KRYMA	dom1_750_1129
Q32M45	ANO4 (TMEM16D)	CaCC	Chloride channels	dom1_572_952	Ortholog	UP000008672	7897	Eukaryota	Fishes	Latimeria chalumnae	H3AXG9	H3AXG9_LATCH	dom1_519_842
Q32M45	ANO4 (TMEM16D)	CaCC	Chloride channels	dom1_572_952	Ortholog	UP000261620	94237	Eukaryota	Fishes	Mola mola	A0A3Q3WL62	A0A3Q3WL62_MOLML	dom1_506_882
Q32M45	ANO4 (TMEM16D)	CaCC	Chloride channels	dom1_572_952	Ortholog	UP000261580	32507	Eukaryota	Fishes	Neolamprologus brichardi	A0A3Q4HKG9	A0A3Q4HKG9_NEOBR	dom1_452_800
Q32M45	ANO4 (TMEM16D)	CaCC	Chloride channels	dom1_572_952	Ortholog	UP000694548	105023	Eukaryota	Fishes	Nothobranchius furzeri	A0A8C6K8I5	A0A8C6K8I5_NOTFU	dom1_591_956
Q32M45	ANO4 (TMEM16D)	CaCC	Chloride channels	dom1_572_952	Ortholog	UP000646548	30732	Eukaryota	Fishes	Oryzias melastigma	A0A3B3D1X4	A0A3B3D1X4_ORYME	dom1_750_1115
Q32M45	ANO4 (TMEM16D)	CaCC	Chloride channels	dom1_572_952	Ortholog	UP000242638	8081	Eukaryota	Fishes	Poecilia reticulata	A0A3P9PJ90	A0A3P9PJ90_POERE	dom1_540_905
Q32M45	ANO4 (TMEM16D)	CaCC	Chloride channels	dom1_572_952	Ortholog	UP000472267	181472	Eukaryota	Fishes	Salarias fasciatus	A0A672HEU4	A0A672HEU4_SALFA	dom1_562_910
Q32M45	ANO4 (TMEM16D)	CaCC	Chloride channels	dom1_572_952	Ortholog	UP000087266	8030	Eukaryota	Fishes	Salmo salar	A0A1S3N0R8	A0A1S3N0R8_SALSA	dom1_768_1134
Q32M45	ANO4 (TMEM16D)	CaCC	Chloride channels	dom1_572_952	Ortholog	UP000472277	8032	Eukaryota	Fishes	Salmo trutta	A0A674DZ67	A0A674DZ67_SALTR	dom1_768_1134
Q32M45	ANO4 (TMEM16D)	CaCC	Chloride channels	dom1_572_952	Ortholog	UP000246464	52904	Eukaryota	Fishes	Scophthalmus maximus	A0A2U9B1K4	A0A2U9B1K4_SCOMX	dom1_692_1047
Q32M45	ANO4 (TMEM16D)	CaCC	Chloride channels	dom1_572_952	Ortholog	UP000472265	8175	Eukaryota	Fishes	Sparus aurata	A0A671VJS2	A0A671VJS2_SPAAU	dom1_576_941
Q32M45	ANO4 (TMEM16D)	CaCC	Chloride channels	dom1_572_952	Ortholog	UP000002852	8083	Eukaryota	Fishes	Xiphophorus maculatus	M3ZVD3	M3ZVD3_XIPMA	dom1_761_1126
Q32M45	ANO4 (TMEM16D)	CaCC	Chloride channels	dom1_572_952	Ortholog	UP000008912	9646	Eukaryota	Mammals	Ailuropoda melanoleuca	A0A7N5K0P7	A0A7N5K0P7_AILME	dom1_770_1150
Q32M45	ANO4 (TMEM16D)	CaCC	Chloride channels	dom1_572_952	Ortholog	UP000694857	9771	Eukaryota	Mammals	Balaenoptera musculus	A0A8B8YLE8	A0A8B8YLE8_BALMU	dom1_572_952
Q32M45	ANO4 (TMEM16D)	CaCC	Chloride channels	dom1_572_952	Ortholog	UP000314981	30522	Eukaryota	Mammals	Bos indicus x Bos taurus	A0A4W2GCT1	A0A4W2GCT1_BOBOX	dom1_922_1302
Q32M45	ANO4 (TMEM16D)	CaCC	Chloride channels	dom1_572_952	Ortholog	UP000009136	9913	Eukaryota	Mammals	Bos taurus	A6QLE6	ANO4_BOVIN	dom1_537_917
Q32M45	ANO4 (TMEM16D)	CaCC	Chloride channels	dom1_572_952	Ortholog	UP000005447	10141	Eukaryota	Mammals	Cavia porcellus	A0A286Y2P6	A0A286Y2P6_CAVPO	dom1_572_946
Q32M45	ANO4 (TMEM16D)	CaCC	Chloride channels	dom1_572_952	Ortholog	UP000233060	9531	Eukaryota	Mammals	Cercocebus atys	A0A2K5N7E2	A0A2K5N7E2_CERAT	dom1_723_1103
Q32M45	ANO4 (TMEM16D)	CaCC	Chloride channels	dom1_572_952	Ortholog	UP000694398	34839	Eukaryota	Mammals	Chinchilla lanigera	A0A8C2VU82	A0A8C2VU82_CHILA	dom1_679_1093
Q32M45	ANO4 (TMEM16D)	CaCC	Chloride channels	dom1_572_952	Ortholog	UP000029965	60711	Eukaryota	Mammals	Chlorocebus sabaeus	A0A0D9S198	A0A0D9S198_CHLSB	dom1_572_952
Q32M45	ANO4 (TMEM16D)	CaCC	Chloride channels	dom1_572_952	Ortholog	UP000233080	336983	Eukaryota	Mammals	Colobus angolensis palliatus	A0A2K5K1L1	A0A2K5K1L1_COLAP	dom1_572_952
Q32M45	ANO4 (TMEM16D)	CaCC	Chloride channels	dom1_572_952	Ortholog	UP000081671	10020	Eukaryota	Mammals	Dipodomys ordii	A0A1S3FHB3	A0A1S3FHB3_DIPOR	dom1_582_958
Q32M45	ANO4 (TMEM16D)	CaCC	Chloride channels	dom1_572_952	Ortholog	UP000079721	9365	Eukaryota	Mammals	Erinaceus europaeus	A0A1S3ANM5	A0A1S3ANM5_ERIEU	dom1_572_952
Q32M45	ANO4 (TMEM16D)	CaCC	Chloride channels	dom1_572_952	Ortholog	UP000028990	885580	Eukaryota	Mammals	Fukomys damarensis	A0A091E5E3	A0A091E5E3_FUKDA	dom1_592_972
Q32M45	ANO4 (TMEM16D)	CaCC	Chloride channels	dom1_572_952	Ortholog	UP000006813	10181	Eukaryota	Mammals	Heterocephalus glaber	G5BBI6	G5BBI6_HETGA	dom1_557_937
Q32M45	ANO4 (TMEM16D)	CaCC	Chloride channels	dom1_572_952	Ortholog	UP000005215	43179	Eukaryota	Mammals	Ictidomys tridecemlineatus	A0A287DCE2	A0A287DCE2_ICTTR	dom1_572_952
Q32M45	ANO4 (TMEM16D)	CaCC	Chloride channels	dom1_572_952	Ortholog	UP000694385	51337	Eukaryota	Mammals	Jaculus jaculus	A0A8C5P3W0	A0A8C5P3W0_JACJA	dom1_572_952
Q32M45	ANO4 (TMEM16D)	CaCC	Chloride channels	dom1_572_952	Ortholog	UP000002280	13616	Eukaryota	Mammals	Monodelphis domestica	F7FL71	F7FL71_MONDO	dom1_775_1155
Q32M45	ANO4 (TMEM16D)	CaCC	Chloride channels	dom1_572_952	Ortholog	UP000000589	10090	Eukaryota	Mammals	Mus musculus	Q8C5H1	ANO4_MOUSE	dom1_572_952
Q32M45	ANO4 (TMEM16D)	CaCC	Chloride channels	dom1_572_952	Ortholog	UP000001074	59463	Eukaryota	Mammals	Myotis lucifugus	G1PN52	G1PN52_MYOLU	dom1_547_928
Q32M45	ANO4 (TMEM16D)	CaCC	Chloride channels	dom1_572_952	Ortholog	UP000694381	1026970	Eukaryota	Mammals	Nannospalax galili	A0A8C6RYZ9	A0A8C6RYZ9_NANGA	dom1_572_952
Q32M45	ANO4 (TMEM16D)	CaCC	Chloride channels	dom1_572_952	Ortholog	UP000515203	10160	Eukaryota	Mammals	Octodon degus	A0A6P3EQI6	A0A6P3EQI6_OCTDE	dom1_572_952
Q32M45	ANO4 (TMEM16D)	CaCC	Chloride channels	dom1_572_952	Ortholog	UP000005225	30611	Eukaryota	Mammals	Otolemur garnettii	H0XCL2	H0XCL2_OTOGA	dom1_572_952
Q32M45	ANO4 (TMEM16D)	CaCC	Chloride channels	dom1_572_952	Ortholog	UP000240080	9597	Eukaryota	Mammals	Pan paniscus	A0A2R9BKT8	A0A2R9BKT8_PANPA	dom1_568_939
Q32M45	ANO4 (TMEM16D)	CaCC	Chloride channels	dom1_572_952	Ortholog	UP000002277	9598	Eukaryota	Mammals	Pan troglodytes	H2RDX1	H2RDX1_PANTR	dom1_572_952
Q32M45	ANO4 (TMEM16D)	CaCC	Chloride channels	dom1_572_952	Ortholog	UP000515140	38626	Eukaryota	Mammals	Phascolarctos cinereus	A0A6P5JYT5	A0A6P5JYT5_PHACI	dom1_775_1155
Q32M45	ANO4 (TMEM16D)	CaCC	Chloride channels	dom1_572_952	Ortholog	UP000001595	9601	Eukaryota	Mammals	Pongo abelii	A0A8I5YKV1	A0A8I5YKV1_PONAB	dom1_738_1118
Q32M45	ANO4 (TMEM16D)	CaCC	Chloride channels	dom1_572_952	Ortholog	UP000472240	59479	Eukaryota	Mammals	Rhinolophus ferrumequinum	A0A671FHI2	A0A671FHI2_RHIFE	dom1_733_1113
Q32M45	ANO4 (TMEM16D)	CaCC	Chloride channels	dom1_572_952	Ortholog	UP000007648	9305	Eukaryota	Mammals	Sarcophilus harrisii	G3WNA6	G3WNA6_SARHA	dom1_572_952
Q32M45	ANO4 (TMEM16D)	CaCC	Chloride channels	dom1_572_952	Ortholog	UP000472268	37032	Eukaryota	Mammals	Suricata suricatta	A0A673V347	A0A673V347_SURSU	dom1_787_1167
Q32M45	ANO4 (TMEM16D)	CaCC	Chloride channels	dom1_572_952	Ortholog	UP000245320	9739	Eukaryota	Mammals	Tursiops truncatus	A0A6J3S3R7	A0A6J3S3R7_TURTR	dom1_722_1094
Q32M45	ANO4 (TMEM16D)	CaCC	Chloride channels	dom1_572_952	Ortholog	UP000261680	29073	Eukaryota	Mammals	Ursus maritimus	A0A8M1GE76	A0A8M1GE76_URSMA	dom1_723_1103
Q32M45	ANO4 (TMEM16D)	CaCC	Chloride channels	dom1_572_952	Ortholog	UP000504605	30538	Eukaryota	Mammals	Vicugna pacos	A0A6J3B0V9	A0A6J3B0V9_VICPA	dom1_572_952
Q32M45	ANO4 (TMEM16D)	CaCC	Chloride channels	dom1_572_952	Ortholog	UP000314987	29139	Eukaryota	Mammals	Vombatus ursinus	A0A4X2M5F4	A0A4X2M5F4_VOMUR	dom1_579_921
Q32M45	ANO4 (TMEM16D)	CaCC	Chloride channels	dom1_572_952	Ortholog	UP000694404	106734	Eukaryota	Reptiles	Chelonoidis abingdonii	A0A8C0GGH3	A0A8C0GGH3_CHEAB	dom1_562_933
Q32M45	ANO4 (TMEM16D)	CaCC	Chloride channels	dom1_572_952	Ortholog	UP000694380	8478	Eukaryota	Reptiles	Chrysemys picta bellii	A0A8C3FAH1	A0A8C3FAH1_CHRPI	dom1_685_1066
Q32M45	ANO4 (TMEM16D)	CaCC	Chloride channels	dom1_572_952	Ortholog	UP000594220	8502	Eukaryota	Reptiles	Crocodylus porosus	A0A7M4DWS6	A0A7M4DWS6_CROPO	dom1_594_974
Q32M45	ANO4 (TMEM16D)	CaCC	Chloride channels	dom1_572_952	Ortholog	UP000007267	13735	Eukaryota	Reptiles	Pelodiscus sinensis	K7FKZ0	K7FKZ0_PELSI	dom1_579_959
Q32M45	ANO4 (TMEM16D)	CaCC	Chloride channels	dom1_572_952	Ortholog	UP000472272	64176	Eukaryota	Reptiles	Podarcis muralis	A0A670IZU2	A0A670IZU2_PODMU	dom1_607_987
Q32M45	ANO4 (TMEM16D)	CaCC	Chloride channels	dom1_572_952	Ortholog	UP000472273	8673	Eukaryota	Reptiles	Pseudonaja textilis	A0A670XYH2	A0A670XYH2_PSETE	dom1_692_1058
Q32M45	ANO4 (TMEM16D)	CaCC	Chloride channels	dom1_572_952	Ortholog	UP000694421	96440	Eukaryota	Reptiles	Salvator merianae	A0A8D0C4A2	A0A8D0C4A2_SALMN	dom1_625_1005
Q32M45	ANO4 (TMEM16D)	CaCC	Chloride channels	dom1_572_952	Ortholog	UP000694392	8508	Eukaryota	Reptiles	Sphenodon punctatus	A0A8D0L3C5	A0A8D0L3C5_SPHPU	dom1_550_930
Q32M45	ANO4 (TMEM16D)	CaCC	Chloride channels	dom1_572_952	Ortholog	UP000694545	61221	Eukaryota	Reptiles	Varanus komodoensis	A0A8D2L0G9	A0A8D2L0G9_VARKO	dom1_718_1094
Q75V66	ANO5 (GDD1, TMEM16E)	CaCC	Chloride channels	dom1_536_883	Ortholog	UP000186698	8355	Eukaryota	Amphibians	Xenopus laevis	A0A8J1KJP2	A0A8J1KJP2_XENLA	dom1_548_910
Q75V66	ANO5 (GDD1, TMEM16E)	CaCC	Chloride channels	dom1_536_883	Ortholog	UP000008143	8364	Eukaryota	Amphibians	Xenopus tropicalis	A0A6I8Q706	A0A6I8Q706_XENTR	dom1_549_911
Q75V66	ANO5 (GDD1, TMEM16E)	CaCC	Chloride channels	dom1_536_883	Ortholog	UP000675881	72036	Eukaryota	Arthropods	Lepeophtheirus salmonis	A0A7R8H371	A0A7R8H371_LEPSM	dom1_480_827
Q75V66	ANO5 (GDD1, TMEM16E)	CaCC	Chloride channels	dom1_536_883	Ortholog	UP000014500	126957	Eukaryota	Arthropods	Strigamia maritima	T1J757	T1J757_STRMM	dom1_619_980
Q75V66	ANO5 (GDD1, TMEM16E)	CaCC	Chloride channels	dom1_536_883	Ortholog	UP000027135	136037	Eukaryota	Arthropods	Zootermopsis nevadensis	A0A067RA79	A0A067RA79_ZOONE	dom1_457_766
Q75V66	ANO5 (GDD1, TMEM16E)	CaCC	Chloride channels	dom1_536_883	Ortholog	UP000296049	8839	Eukaryota	Birds	Anas platyrhynchos	R0LBH2	R0LBH2_ANAPL	dom1_477_825
Q75V66	ANO5 (GDD1, TMEM16E)	CaCC	Chloride channels	dom1_536_883	Ortholog	UP000016666	8840	Eukaryota	Birds	Anas platyrhynchos platyrhynchos	A0A493T6A7	A0A493T6A7_ANAPP	dom1_624_972
Q75V66	ANO5 (GDD1, TMEM16E)	CaCC	Chloride channels	dom1_536_883	Ortholog	UP000472269	194338	Eukaryota	Birds	Athene cunicularia	A0A663MFD9	A0A663MFD9_ATHCN	dom1_438_778
Q75V66	ANO5 (GDD1, TMEM16E)	CaCC	Chloride channels	dom1_536_883	Ortholog	UP000276834	44316	Eukaryota	Birds	Chloebia gouldiae	A0A3L8S232	A0A3L8S232_CHLGU	dom1_548_867
Q75V66	ANO5 (GDD1, TMEM16E)	CaCC	Chloride channels	dom1_536_883	Ortholog	UP000603793	1196302	Eukaryota	Birds	Corvus moneduloides	A0A851WQT5	A0A851WQT5_CORMO	dom1_492_854
Q75V66	ANO5 (GDD1, TMEM16E)	CaCC	Chloride channels	dom1_536_883	Ortholog	UP000694562	100819	Eukaryota	Birds	Falco tinnunculus	A0A8C4TXB2	A0A8C4TXB2_FALTI	dom1_551_899
Q75V66	ANO5 (GDD1, TMEM16E)	CaCC	Chloride channels	dom1_536_883	Ortholog	UP000016665	59894	Eukaryota	Birds	Ficedula albicollis	U3JG72	U3JG72_FICAL	dom1_656_1004
Q75V66	ANO5 (GDD1, TMEM16E)	CaCC	Chloride channels	dom1_536_883	Ortholog	UP000000539	9031	Eukaryota	Birds	Gallus gallus	A0A8V0Z6Y8	A0A8V0Z6Y8_CHICK	dom1_566_914
Q75V66	ANO5 (GDD1, TMEM16E)	CaCC	Chloride channels	dom1_536_883	Ortholog	UP000694408	40217	Eukaryota	Birds	Junco hyemalis	A0A8C5JJY6	A0A8C5JJY6_JUNHY	dom1_549_897
Q75V66	ANO5 (GDD1, TMEM16E)	CaCC	Chloride channels	dom1_536_883	Ortholog	UP000001645	9103	Eukaryota	Birds	Meleagris gallopavo	A0A803YKS8	A0A803YKS8_MELGA	dom1_536_884
Q75V66	ANO5 (GDD1, TMEM16E)	CaCC	Chloride channels	dom1_536_883	Ortholog	UP000694405	13146	Eukaryota	Birds	Melopsittacus undulatus	A0A8V5FMW7	A0A8V5FMW7_MELUD	dom1_536_884
Q75V66	ANO5 (GDD1, TMEM16E)	CaCC	Chloride channels	dom1_536_883	Ortholog	UP000472261	9054	Eukaryota	Birds	Phasianus colchicus	A0A669R0W5	A0A669R0W5_PHACC	dom1_535_883
Q75V66	ANO5 (GDD1, TMEM16E)	CaCC	Chloride channels	dom1_536_883	Ortholog	UP000694409	9135	Eukaryota	Birds	Serinus canaria	A0A8C9N3G7	A0A8C9N3G7_SERCA	dom1_526_874
Q75V66	ANO5 (GDD1, TMEM16E)	CaCC	Chloride channels	dom1_536_883	Ortholog	UP000472266	2489341	Eukaryota	Birds	Strigops habroptila	A0A672UNZ6	A0A672UNZ6_STRHB	dom1_536_884
Q75V66	ANO5 (GDD1, TMEM16E)	CaCC	Chloride channels	dom1_536_883	Ortholog	UP000007754	59729	Eukaryota	Birds	Taeniopygia guttata	A0A674GC93	A0A674GC93_TAEGU	dom1_582_930
Q75V66	ANO5 (GDD1, TMEM16E)	CaCC	Chloride channels	dom1_536_883	Ortholog	UP000054190	56313	Eukaryota	Birds	Tyto alba	A0A093ELQ7	A0A093ELQ7_TYTAL	dom1_467_815
Q75V66	ANO5 (GDD1, TMEM16E)	CaCC	Chloride channels	dom1_536_883	Ortholog	UP000257160	80972	Eukaryota	Fishes	Amphiprion ocellaris	A0A3Q1CKN7	A0A3Q1CKN7_AMPOC	dom1_524_881
Q75V66	ANO5 (GDD1, TMEM16E)	CaCC	Chloride channels	dom1_536_883	Ortholog	UP000265040	64144	Eukaryota	Fishes	Anabas testudineus	A0A7N6AIM3	A0A7N6AIM3_ANATE	dom1_524_884
Q75V66	ANO5 (GDD1, TMEM16E)	CaCC	Chloride channels	dom1_536_883	Ortholog	UP000018467	7994	Eukaryota	Fishes	Astyanax mexicanus	A0A3B1IV70	A0A3B1IV70_ASTMX	dom1_580_937
Q75V66	ANO5 (GDD1, TMEM16E)	CaCC	Chloride channels	dom1_536_883	Ortholog	UP000314986	7868	Eukaryota	Fishes	Callorhinchus milii	A0A4W3JPQ8	A0A4W3JPQ8_CALMI	dom1_530_881
Q75V66	ANO5 (GDD1, TMEM16E)	CaCC	Chloride channels	dom1_536_883	Ortholog	UP000287033	137246	Eukaryota	Fishes	Chiloscyllium punctatum	A0A401S4W7	A0A401S4W7_CHIPU	dom1_525_870
Q75V66	ANO5 (GDD1, TMEM16E)	CaCC	Chloride channels	dom1_536_883	Ortholog	UP000265120	244447	Eukaryota	Fishes	Cynoglossus semilaevis	A0A3P8V5N3	A0A3P8V5N3_CYNSE	dom1_573_933
Q75V66	ANO5 (GDD1, TMEM16E)	CaCC	Chloride channels	dom1_536_883	Ortholog	UP000265020	28743	Eukaryota	Fishes	Cyprinodon variegatus	A0A3Q2D6H1	A0A3Q2D6H1_CYPVA	dom1_538_878
Q75V66	ANO5 (GDD1, TMEM16E)	CaCC	Chloride channels	dom1_536_883	Ortholog	UP000472264	173247	Eukaryota	Fishes	Echeneis naucrates	A0A665V4V0	A0A665V4V0_ECHNA	dom1_524_881
Q75V66	ANO5 (GDD1, TMEM16E)	CaCC	Chloride channels	dom1_536_883	Ortholog	UP000314983	8005	Eukaryota	Fishes	Electrophorus electricus	A0A4W4E5Q1	A0A4W4E5Q1_ELEEL	dom1_511_871
Q75V66	ANO5 (GDD1, TMEM16E)	CaCC	Chloride channels	dom1_536_883	Ortholog	UP000265140	8010	Eukaryota	Fishes	Esox lucius	A0A3P9AIW0	A0A3P9AIW0_ESOLU	dom1_543_910
Q75V66	ANO5 (GDD1, TMEM16E)	CaCC	Chloride channels	dom1_536_883	Ortholog	UP000694546	8049	Eukaryota	Fishes	Gadus morhua	A0A8C5BPN8	A0A8C5BPN8_GADMO	dom1_580_960
Q75V66	ANO5 (GDD1, TMEM16E)	CaCC	Chloride channels	dom1_536_883	Ortholog	UP000250572	33528	Eukaryota	Fishes	Gambusia affinis	A0A315W4F6	A0A315W4F6_GAMAF	dom1_609_975
Q75V66	ANO5 (GDD1, TMEM16E)	CaCC	Chloride channels	dom1_536_883	Ortholog	UP000007635	69293	Eukaryota	Fishes	Gasterosteus aculeatus	G3PSB7	G3PSB7_GASAC	dom1_479_835
Q75V66	ANO5 (GDD1, TMEM16E)	CaCC	Chloride channels	dom1_536_883	Ortholog	UP000264840	8153	Eukaryota	Fishes	Haplochromis burtoni	A0A3Q3BYA9	A0A3Q3BYA9_HAPBU	dom1_584_941
Q75V66	ANO5 (GDD1, TMEM16E)	CaCC	Chloride channels	dom1_536_883	Ortholog	UP000008672	7897	Eukaryota	Fishes	Latimeria chalumnae	H3B8B6	H3B8B6_LATCH	dom1_432_810
Q75V66	ANO5 (GDD1, TMEM16E)	CaCC	Chloride channels	dom1_536_883	Ortholog	UP000018468	7918	Eukaryota	Fishes	Lepisosteus oculatus	W5MHZ7	W5MHZ7_LEPOC	dom1_483_863
Q75V66	ANO5 (GDD1, TMEM16E)	CaCC	Chloride channels	dom1_536_883	Ortholog	UP000261620	94237	Eukaryota	Fishes	Mola mola	A0A3Q3X4W9	A0A3Q3X4W9_MOLML	dom1_525_908
Q75V66	ANO5 (GDD1, TMEM16E)	CaCC	Chloride channels	dom1_536_883	Ortholog	UP000261580	32507	Eukaryota	Fishes	Neolamprologus brichardi	A0A3Q4HJB2	A0A3Q4HJB2_NEOBR	dom1_489_846
Q75V66	ANO5 (GDD1, TMEM16E)	CaCC	Chloride channels	dom1_536_883	Ortholog	UP000694548	105023	Eukaryota	Fishes	Nothobranchius furzeri	A0A8C6Q296	A0A8C6Q296_NOTFU	dom1_573_919
Q75V66	ANO5 (GDD1, TMEM16E)	CaCC	Chloride channels	dom1_536_883	Ortholog	UP000472276	47969	Eukaryota	Fishes	Oreochromis aureus	A0A668RYX1	A0A668RYX1_OREAU	dom1_524_881
Q75V66	ANO5 (GDD1, TMEM16E)	CaCC	Chloride channels	dom1_536_883	Ortholog	UP000005207	8128	Eukaryota	Fishes	Oreochromis niloticus	I3JNH6	I3JNH6_ORENI	dom1_524_881
Q75V66	ANO5 (GDD1, TMEM16E)	CaCC	Chloride channels	dom1_536_883	Ortholog	UP000283210	123683	Eukaryota	Fishes	Oryzias javanicus	A0A437D9P0	A0A437D9P0_ORYJA	dom1_524_884
Q75V66	ANO5 (GDD1, TMEM16E)	CaCC	Chloride channels	dom1_536_883	Ortholog	UP000001038	8090	Eukaryota	Fishes	Oryzias latipes	A0A3B3HI13	A0A3B3HI13_ORYLA	dom1_649_1009
Q75V66	ANO5 (GDD1, TMEM16E)	CaCC	Chloride channels	dom1_536_883	Ortholog	UP000646548	30732	Eukaryota	Fishes	Oryzias melastigma	A0A834L264	A0A834L264_ORYME	dom1_584_944
Q75V66	ANO5 (GDD1, TMEM16E)	CaCC	Chloride channels	dom1_536_883	Ortholog	UP000028760	48698	Eukaryota	Fishes	Poecilia formosa	A0A087YP15	A0A087YP15_POEFO	dom1_522_889
Q75V66	ANO5 (GDD1, TMEM16E)	CaCC	Chloride channels	dom1_536_883	Ortholog	UP000242638	8081	Eukaryota	Fishes	Poecilia reticulata	A0A3P9PGG1	A0A3P9PGG1_POERE	dom1_493_837
Q75V66	ANO5 (GDD1, TMEM16E)	CaCC	Chloride channels	dom1_536_883	Ortholog	UP000472267	181472	Eukaryota	Fishes	Salarias fasciatus	A0A672HIH5	A0A672HIH5_SALFA	dom1_524_882
Q75V66	ANO5 (GDD1, TMEM16E)	CaCC	Chloride channels	dom1_536_883	Ortholog	UP000087266	8030	Eukaryota	Fishes	Salmo salar	A0A1S3PUJ9	A0A1S3PUJ9_SALSA	dom1_512_870
Q75V66	ANO5 (GDD1, TMEM16E)	CaCC	Chloride channels	dom1_536_883	Ortholog	UP000472277	8032	Eukaryota	Fishes	Salmo trutta	A0A673XQA9	A0A673XQA9_SALTR	dom1_527_885
Q75V66	ANO5 (GDD1, TMEM16E)	CaCC	Chloride channels	dom1_536_883	Ortholog	UP000246464	52904	Eukaryota	Fishes	Scophthalmus maximus	A0A2U9BYR6	A0A2U9BYR6_SCOMX	dom1_523_883
Q75V66	ANO5 (GDD1, TMEM16E)	CaCC	Chloride channels	dom1_536_883	Ortholog	UP000472262	75366	Eukaryota	Fishes	Sinocyclocheilus grahami	A0A672Q118	A0A672Q118_SINGR	dom1_505_863
Q75V66	ANO5 (GDD1, TMEM16E)	CaCC	Chloride channels	dom1_536_883	Ortholog	UP000472265	8175	Eukaryota	Fishes	Sparus aurata	A0A671UHX4	A0A671UHX4_SPAAU	dom1_570_944
Q75V66	ANO5 (GDD1, TMEM16E)	CaCC	Chloride channels	dom1_536_883	Ortholog	UP000005226	31033	Eukaryota	Fishes	Takifugu rubripes	A0A674NBW8	A0A674NBW8_TAKRU	dom1_582_939
Q75V66	ANO5 (GDD1, TMEM16E)	CaCC	Chloride channels	dom1_536_883	Ortholog	UP000007303	99883	Eukaryota	Fishes	Tetraodon nigroviridis	H3D841	H3D841_TETNG	dom1_479_836
Q75V66	ANO5 (GDD1, TMEM16E)	CaCC	Chloride channels	dom1_536_883	Ortholog	UP000002852	8083	Eukaryota	Fishes	Xiphophorus maculatus	A0A3B5PPN6	A0A3B5PPN6_XIPMA	dom1_582_940
Q75V66	ANO5 (GDD1, TMEM16E)	CaCC	Chloride channels	dom1_536_883	Ortholog	UP000008912	9646	Eukaryota	Mammals	Ailuropoda melanoleuca	A0A7N5JJ51	A0A7N5JJ51_AILME	dom1_444_791
Q75V66	ANO5 (GDD1, TMEM16E)	CaCC	Chloride channels	dom1_536_883	Ortholog	UP000233020	37293	Eukaryota	Mammals	Aotus nancymaae	A0A2K5D7E0	A0A2K5D7E0_AOTNA	dom1_535_882
Q75V66	ANO5 (GDD1, TMEM16E)	CaCC	Chloride channels	dom1_536_883	Ortholog	UP000694857	9771	Eukaryota	Mammals	Balaenoptera musculus	A0A8B8Y496	A0A8B8Y496_BALMU	dom1_679_1026
Q75V66	ANO5 (GDD1, TMEM16E)	CaCC	Chloride channels	dom1_536_883	Ortholog	UP000314981	30522	Eukaryota	Mammals	Bos indicus x Bos taurus	A0A4W2BS01	A0A4W2BS01_BOBOX	dom1_762_1109
Q75V66	ANO5 (GDD1, TMEM16E)	CaCC	Chloride channels	dom1_536_883	Ortholog	UP000009136	9913	Eukaryota	Mammals	Bos taurus	F1MPC2	F1MPC2_BOVIN	dom1_761_1108
Q75V66	ANO5 (GDD1, TMEM16E)	CaCC	Chloride channels	dom1_536_883	Ortholog	UP000008225	9483	Eukaryota	Mammals	Callithrix jacchus	F7EUG3	F7EUG3_CALJA	dom1_777_1124
Q75V66	ANO5 (GDD1, TMEM16E)	CaCC	Chloride channels	dom1_536_883	Ortholog	UP000002254	9615	Eukaryota	Mammals	Canis lupus familiaris	A0A8I3S651	A0A8I3S651_CANLF	dom1_541_888
Q75V66	ANO5 (GDD1, TMEM16E)	CaCC	Chloride channels	dom1_536_883	Ortholog	UP000291000	9925	Eukaryota	Mammals	Capra hircus	A0A452DZX8	A0A452DZX8_CAPHI	dom1_475_822
Q75V66	ANO5 (GDD1, TMEM16E)	CaCC	Chloride channels	dom1_536_883	Ortholog	UP000189704	1868482	Eukaryota	Mammals	Carlito syrichta	A0A1U7TAH1	A0A1U7TAH1_CARSF	dom1_298_645
Q75V66	ANO5 (GDD1, TMEM16E)	CaCC	Chloride channels	dom1_536_883	Ortholog	UP000005447	10141	Eukaryota	Mammals	Cavia porcellus	H0VPW8	H0VPW8_CAVPO	dom1_509_856
Q75V66	ANO5 (GDD1, TMEM16E)	CaCC	Chloride channels	dom1_536_883	Ortholog	UP000233040	2715852	Eukaryota	Mammals	Cebus imitator	A0A2K5RSG2	A0A2K5RSG2_CEBIM	dom1_536_883
Q75V66	ANO5 (GDD1, TMEM16E)	CaCC	Chloride channels	dom1_536_883	Ortholog	UP000233060	9531	Eukaryota	Mammals	Cercocebus atys	A0A2K5N629	A0A2K5N629_CERAT	dom1_536_883
Q75V66	ANO5 (GDD1, TMEM16E)	CaCC	Chloride channels	dom1_536_883	Ortholog	UP000694398	34839	Eukaryota	Mammals	Chinchilla lanigera	A0A8C2YJL3	A0A8C2YJL3_CHILA	dom1_509_856
Q75V66	ANO5 (GDD1, TMEM16E)	CaCC	Chloride channels	dom1_536_883	Ortholog	UP000029965	60711	Eukaryota	Mammals	Chlorocebus sabaeus	A0A0D9QYP9	A0A0D9QYP9_CHLSB	dom1_535_882
Q75V66	ANO5 (GDD1, TMEM16E)	CaCC	Chloride channels	dom1_536_883	Ortholog	UP000233080	336983	Eukaryota	Mammals	Colobus angolensis palliatus	A0A2K5IF92	A0A2K5IF92_COLAP	dom1_536_883
Q75V66	ANO5 (GDD1, TMEM16E)	CaCC	Chloride channels	dom1_536_883	Ortholog	UP000001075	10029	Eukaryota	Mammals	Cricetulus griseus	G3HTT1	G3HTT1_CRIGR	dom1_410_757
Q75V66	ANO5 (GDD1, TMEM16E)	CaCC	Chloride channels	dom1_536_883	Ortholog	UP000081671	10020	Eukaryota	Mammals	Dipodomys ordii	A0A1S3FGT5	A0A1S3FGT5_DIPOR	dom1_520_873
Q75V66	ANO5 (GDD1, TMEM16E)	CaCC	Chloride channels	dom1_536_883	Ortholog	UP000002281	9796	Eukaryota	Mammals	Equus caballus	A0A3Q2HDW2	A0A3Q2HDW2_HORSE	dom1_764_1111
Q75V66	ANO5 (GDD1, TMEM16E)	CaCC	Chloride channels	dom1_536_883	Ortholog	UP000079721	9365	Eukaryota	Mammals	Erinaceus europaeus	A0A1S3W2E6	A0A1S3W2E6_ERIEU	dom1_508_847
Q75V66	ANO5 (GDD1, TMEM16E)	CaCC	Chloride channels	dom1_536_883	Ortholog	UP000011712	9685	Eukaryota	Mammals	Felis catus	M3WYP5	M3WYP5_FELCA	dom1_790_1137
Q75V66	ANO5 (GDD1, TMEM16E)	CaCC	Chloride channels	dom1_536_883	Ortholog	UP000028990	885580	Eukaryota	Mammals	Fukomys damarensis	A0A091EGJ7	A0A091EGJ7_FUKDA	dom1_535_882
Q75V66	ANO5 (GDD1, TMEM16E)	CaCC	Chloride channels	dom1_536_883	Ortholog	UP000001519	9595	Eukaryota	Mammals	Gorilla gorilla gorilla	G3RKI2	G3RKI2_GORGO	dom1_536_883
Q75V66	ANO5 (GDD1, TMEM16E)	CaCC	Chloride channels	dom1_536_883	Ortholog	UP000006813	10181	Eukaryota	Mammals	Heterocephalus glaber	G5AR27	G5AR27_HETGA	dom1_521_868
Q75V66	ANO5 (GDD1, TMEM16E)	CaCC	Chloride channels	dom1_536_883	Ortholog	UP000005215	43179	Eukaryota	Mammals	Ictidomys tridecemlineatus	A0A287D5I2	A0A287D5I2_ICTTR	dom1_527_866
Q75V66	ANO5 (GDD1, TMEM16E)	CaCC	Chloride channels	dom1_536_883	Ortholog	UP000694385	51337	Eukaryota	Mammals	Jaculus jaculus	A0A8C5KRX4	A0A8C5KRX4_JACJA	dom1_515_863
Q75V66	ANO5 (GDD1, TMEM16E)	CaCC	Chloride channels	dom1_536_883	Ortholog	UP000007646	9785	Eukaryota	Mammals	Loxodonta africana	G3T7Y2	G3T7Y2_LOXAF	dom1_488_835
Q75V66	ANO5 (GDD1, TMEM16E)	CaCC	Chloride channels	dom1_536_883	Ortholog	UP000233100	9541	Eukaryota	Mammals	Macaca fascicularis	A0A2K5U7C3	A0A2K5U7C3_MACFA	dom1_723_1070
Q75V66	ANO5 (GDD1, TMEM16E)	CaCC	Chloride channels	dom1_536_883	Ortholog	UP000006718	9544	Eukaryota	Mammals	Macaca mulatta	F7HQS3	F7HQS3_MACMU	dom1_803_1150
Q75V66	ANO5 (GDD1, TMEM16E)	CaCC	Chloride channels	dom1_536_883	Ortholog	UP000233120	9545	Eukaryota	Mammals	Macaca nemestrina	A0A2K6DFS5	A0A2K6DFS5_MACNE	dom1_536_883
Q75V66	ANO5 (GDD1, TMEM16E)	CaCC	Chloride channels	dom1_536_883	Ortholog	UP000694394	30608	Eukaryota	Mammals	Microcebus murinus	A0A8C5XJ11	A0A8C5XJ11_MICMU	dom1_535_874
Q75V66	ANO5 (GDD1, TMEM16E)	CaCC	Chloride channels	dom1_536_883	Ortholog	UP000002280	13616	Eukaryota	Mammals	Monodelphis domestica	F7CR53	F7CR53_MONDO	dom1_525_799
Q75V66	ANO5 (GDD1, TMEM16E)	CaCC	Chloride channels	dom1_536_883	Ortholog	UP000000589	10090	Eukaryota	Mammals	Mus musculus	Q75UR0	ANO5_MOUSE	dom1_527_874
Q75V66	ANO5 (GDD1, TMEM16E)	CaCC	Chloride channels	dom1_536_883	Ortholog	UP000000715	9669	Eukaryota	Mammals	Mustela putorius furo	A0A8U0MSC8	A0A8U0MSC8_MUSPF	dom1_582_921
Q75V66	ANO5 (GDD1, TMEM16E)	CaCC	Chloride channels	dom1_536_883	Ortholog	UP000001074	59463	Eukaryota	Mammals	Myotis lucifugus	G1PQA4	G1PQA4_MYOLU	dom1_439_794
Q75V66	ANO5 (GDD1, TMEM16E)	CaCC	Chloride channels	dom1_536_883	Ortholog	UP000694381	1026970	Eukaryota	Mammals	Nannospalax galili	A0A8C6R131	A0A8C6R131_NANGA	dom1_482_818
Q75V66	ANO5 (GDD1, TMEM16E)	CaCC	Chloride channels	dom1_536_883	Ortholog	UP000001073	61853	Eukaryota	Mammals	Nomascus leucogenys	G1S826	G1S826_NOMLE	dom1_535_882
Q75V66	ANO5 (GDD1, TMEM16E)	CaCC	Chloride channels	dom1_536_883	Ortholog	UP000515203	10160	Eukaryota	Mammals	Octodon degus	A0A6P6DEU1	A0A6P6DEU1_OCTDE	dom1_529_876
Q75V66	ANO5 (GDD1, TMEM16E)	CaCC	Chloride channels	dom1_536_883	Ortholog	UP000002279	9258	Eukaryota	Mammals	Ornithorhynchus anatinus	A0A6I8NLN2	A0A6I8NLN2_ORNAN	dom1_566_927
Q75V66	ANO5 (GDD1, TMEM16E)	CaCC	Chloride channels	dom1_536_883	Ortholog	UP000001811	9986	Eukaryota	Mammals	Oryctolagus cuniculus	A0A5F9DM93	A0A5F9DM93_RABIT	dom1_663_1010
Q75V66	ANO5 (GDD1, TMEM16E)	CaCC	Chloride channels	dom1_536_883	Ortholog	UP000005225	30611	Eukaryota	Mammals	Otolemur garnettii	H0WNM0	H0WNM0_OTOGA	dom1_497_836
Q75V66	ANO5 (GDD1, TMEM16E)	CaCC	Chloride channels	dom1_536_883	Ortholog	UP000002356	9940	Eukaryota	Mammals	Ovis aries	W5PD36	W5PD36_SHEEP	dom1_523_870
Q75V66	ANO5 (GDD1, TMEM16E)	CaCC	Chloride channels	dom1_536_883	Ortholog	UP000240080	9597	Eukaryota	Mammals	Pan paniscus	A0A2R9AG47	A0A2R9AG47_PANPA	dom1_718_1065
Q75V66	ANO5 (GDD1, TMEM16E)	CaCC	Chloride channels	dom1_536_883	Ortholog	UP000002277	9598	Eukaryota	Mammals	Pan troglodytes	H2Q3B1	H2Q3B1_PANTR	dom1_536_883
Q75V66	ANO5 (GDD1, TMEM16E)	CaCC	Chloride channels	dom1_536_883	Ortholog	UP000028761	9555	Eukaryota	Mammals	Papio anubis	A0A096N448	A0A096N448_PAPAN	dom1_799_1146
Q75V66	ANO5 (GDD1, TMEM16E)	CaCC	Chloride channels	dom1_536_883	Ortholog	UP000515140	38626	Eukaryota	Mammals	Phascolarctos cinereus	A0A6P5LIF9	A0A6P5LIF9_PHACI	dom1_550_896
Q75V66	ANO5 (GDD1, TMEM16E)	CaCC	Chloride channels	dom1_536_883	Ortholog	UP000001595	9601	Eukaryota	Mammals	Pongo abelii	H2NDW1	H2NDW1_PONAB	dom1_536_883
Q75V66	ANO5 (GDD1, TMEM16E)	CaCC	Chloride channels	dom1_536_883	Ortholog	UP000233160	379532	Eukaryota	Mammals	Propithecus coquereli	A0A2K6G389	A0A2K6G389_PROCO	dom1_460_799
Q75V66	ANO5 (GDD1, TMEM16E)	CaCC	Chloride channels	dom1_536_883	Ortholog	UP000515202	132908	Eukaryota	Mammals	Pteropus vampyrus	A0A6P3QIJ8	A0A6P3QIJ8_PTEVA	dom1_536_862
Q75V66	ANO5 (GDD1, TMEM16E)	CaCC	Chloride channels	dom1_536_883	Ortholog	UP000472240	59479	Eukaryota	Mammals	Rhinolophus ferrumequinum	A0A671FET1	A0A671FET1_RHIFE	dom1_748_1087
Q75V66	ANO5 (GDD1, TMEM16E)	CaCC	Chloride channels	dom1_536_883	Ortholog	UP000233180	61621	Eukaryota	Mammals	Rhinopithecus bieti	A0A2K6JTG4	A0A2K6JTG4_RHIBE	dom1_536_848
Q75V66	ANO5 (GDD1, TMEM16E)	CaCC	Chloride channels	dom1_536_883	Ortholog	UP000233200	61622	Eukaryota	Mammals	Rhinopithecus roxellana	A0A2K6R4H2	A0A2K6R4H2_RHIRO	dom1_531_878
Q75V66	ANO5 (GDD1, TMEM16E)	CaCC	Chloride channels	dom1_536_883	Ortholog	UP000233220	39432	Eukaryota	Mammals	Saimiri boliviensis boliviensis	A0A2K6T1F1	A0A2K6T1F1_SAIBB	dom1_710_1057
Q75V66	ANO5 (GDD1, TMEM16E)	CaCC	Chloride channels	dom1_536_883	Ortholog	UP000007648	9305	Eukaryota	Mammals	Sarcophilus harrisii	G3WGN2	G3WGN2_SARHA	dom1_576_924
Q75V66	ANO5 (GDD1, TMEM16E)	CaCC	Chloride channels	dom1_536_883	Ortholog	UP000472268	37032	Eukaryota	Mammals	Suricata suricatta	A0A673UE62	A0A673UE62_SURSU	dom1_727_1074
Q75V66	ANO5 (GDD1, TMEM16E)	CaCC	Chloride channels	dom1_536_883	Ortholog	UP000245320	9739	Eukaryota	Mammals	Tursiops truncatus	A0A6J3RVH7	A0A6J3RVH7_TURTR	dom1_523_870
Q75V66	ANO5 (GDD1, TMEM16E)	CaCC	Chloride channels	dom1_536_883	Ortholog	UP000291022	9643	Eukaryota	Mammals	Ursus americanus	A0A452R5F1	A0A452R5F1_URSAM	dom1_310_657
Q75V66	ANO5 (GDD1, TMEM16E)	CaCC	Chloride channels	dom1_536_883	Ortholog	UP000261680	29073	Eukaryota	Mammals	Ursus maritimus	A0A384BSG5	A0A384BSG5_URSMA	dom1_524_871
Q75V66	ANO5 (GDD1, TMEM16E)	CaCC	Chloride channels	dom1_536_883	Ortholog	UP000504605	30538	Eukaryota	Mammals	Vicugna pacos	A0A6I9IFN1	A0A6I9IFN1_VICPA	dom1_675_1022
Q75V66	ANO5 (GDD1, TMEM16E)	CaCC	Chloride channels	dom1_536_883	Ortholog	UP000314987	29139	Eukaryota	Mammals	Vombatus ursinus	A0A4X2JZP0	A0A4X2JZP0_VOMUR	dom1_549_895
Q75V66	ANO5 (GDD1, TMEM16E)	CaCC	Chloride channels	dom1_536_883	Ortholog	UP000286640	9627	Eukaryota	Mammals	Vulpes vulpes	A0A3Q7TVY3	A0A3Q7TVY3_VULVU	dom1_496_843
Q75V66	ANO5 (GDD1, TMEM16E)	CaCC	Chloride channels	dom1_536_883	Ortholog	UP000001646	28377	Eukaryota	Reptiles	Anolis carolinensis	A0A803SZY6	A0A803SZY6_ANOCA	dom1_502_857
Q75V66	ANO5 (GDD1, TMEM16E)	CaCC	Chloride channels	dom1_536_883	Ortholog	UP000694404	106734	Eukaryota	Reptiles	Chelonoidis abingdonii	A0A8C0HEV9	A0A8C0HEV9_CHEAB	dom1_511_860
Q75V66	ANO5 (GDD1, TMEM16E)	CaCC	Chloride channels	dom1_536_883	Ortholog	UP000694380	8478	Eukaryota	Reptiles	Chrysemys picta bellii	A0A8C3PG89	A0A8C3PG89_CHRPI	dom1_565_930
Q75V66	ANO5 (GDD1, TMEM16E)	CaCC	Chloride channels	dom1_536_883	Ortholog	UP000594220	8502	Eukaryota	Reptiles	Crocodylus porosus	A0A7M4EKB0	A0A7M4EKB0_CROPO	dom1_551_898
Q75V66	ANO5 (GDD1, TMEM16E)	CaCC	Chloride channels	dom1_536_883	Ortholog	UP000007267	13735	Eukaryota	Reptiles	Pelodiscus sinensis	K7GAR2	K7GAR2_PELSI	dom1_492_857
Q75V66	ANO5 (GDD1, TMEM16E)	CaCC	Chloride channels	dom1_536_883	Ortholog	UP000472272	64176	Eukaryota	Reptiles	Podarcis muralis	A0A670IFU1	A0A670IFU1_PODMU	dom1_551_916
Q75V66	ANO5 (GDD1, TMEM16E)	CaCC	Chloride channels	dom1_536_883	Ortholog	UP000472273	8673	Eukaryota	Reptiles	Pseudonaja textilis	A0A670Y7P1	A0A670Y7P1_PSETE	dom1_483_848
Q75V66	ANO5 (GDD1, TMEM16E)	CaCC	Chloride channels	dom1_536_883	Ortholog	UP000694421	96440	Eukaryota	Reptiles	Salvator merianae	A0A8D0B7Q1	A0A8D0B7Q1_SALMN	dom1_538_894
Q75V66	ANO5 (GDD1, TMEM16E)	CaCC	Chloride channels	dom1_536_883	Ortholog	UP000694545	61221	Eukaryota	Reptiles	Varanus komodoensis	A0A8D2J086	A0A8D2J086_VARKO	dom1_536_901
Q75V66	ANO5 (GDD1, TMEM16E)	CaCC	Chloride channels	dom1_536_883	Ortholog	UP000008144	7719	Eukaryota	Tunicates	Ciona intestinalis	H2Y3G9	H2Y3G9_CIOIN	dom1_502_894
Q75V66	ANO5 (GDD1, TMEM16E)	CaCC	Chloride channels	dom1_536_883	Ortholog	UP000007875	51511	Eukaryota	Tunicates	Ciona savignyi	H2YZL7	H2YZL7_CIOSA	dom1_478_844
Q4KMQ2	ANO6 (TMEM16F)	CaCC	Chloride channels	dom1_530_878	Ortholog	UP000186698	8355	Eukaryota	Amphibians	Xenopus laevis	A0A1L8GYT8	A0A1L8GYT8_XENLA	dom1_531_876
Q4KMQ2	ANO6 (TMEM16F)	CaCC	Chloride channels	dom1_530_878	Ortholog	UP000008143	8364	Eukaryota	Amphibians	Xenopus tropicalis	A0A6I8SNU5	A0A6I8SNU5_XENTR	dom1_531_876
Q4KMQ2	ANO6 (TMEM16F)	CaCC	Chloride channels	dom1_530_878	Ortholog	UP000296049	8839	Eukaryota	Birds	Anas platyrhynchos	R0KED5	R0KED5_ANAPL	dom1_477_825
Q4KMQ2	ANO6 (TMEM16F)	CaCC	Chloride channels	dom1_530_878	Ortholog	UP000016666	8840	Eukaryota	Birds	Anas platyrhynchos platyrhynchos	A0A493U4K9	A0A493U4K9_ANAPP	dom1_447_793
Q4KMQ2	ANO6 (TMEM16F)	CaCC	Chloride channels	dom1_530_878	Ortholog	UP000472269	194338	Eukaryota	Birds	Athene cunicularia	A0A663MRZ7	A0A663MRZ7_ATHCN	dom1_516_862
Q4KMQ2	ANO6 (TMEM16F)	CaCC	Chloride channels	dom1_530_878	Ortholog	UP000276834	44316	Eukaryota	Birds	Chloebia gouldiae	A0A3L8ST86	A0A3L8ST86_CHLGU	dom1_503_841
Q4KMQ2	ANO6 (TMEM16F)	CaCC	Chloride channels	dom1_530_878	Ortholog	UP000603793	1196302	Eukaryota	Birds	Corvus moneduloides	A0A851WBA7	A0A851WBA7_CORMO	dom1_505_853
Q4KMQ2	ANO6 (TMEM16F)	CaCC	Chloride channels	dom1_530_878	Ortholog	UP000694562	100819	Eukaryota	Birds	Falco tinnunculus	A0A8C4XMI6	A0A8C4XMI6_FALTI	dom1_533_879
Q4KMQ2	ANO6 (TMEM16F)	CaCC	Chloride channels	dom1_530_878	Ortholog	UP000016665	59894	Eukaryota	Birds	Ficedula albicollis	U3K6E4	U3K6E4_FICAL	dom1_532_878
Q4KMQ2	ANO6 (TMEM16F)	CaCC	Chloride channels	dom1_530_878	Ortholog	UP000000539	9031	Eukaryota	Birds	Gallus gallus	A0A8V0YNL3	A0A8V0YNL3_CHICK	dom1_533_875
Q4KMQ2	ANO6 (TMEM16F)	CaCC	Chloride channels	dom1_530_878	Ortholog	UP000694408	40217	Eukaryota	Birds	Junco hyemalis	A0A8C5JSC6	A0A8C5JSC6_JUNHY	dom1_535_881
Q4KMQ2	ANO6 (TMEM16F)	CaCC	Chloride channels	dom1_530_878	Ortholog	UP000001645	9103	Eukaryota	Birds	Meleagris gallopavo	G1NBG1	G1NBG1_MELGA	dom1_442_784
Q4KMQ2	ANO6 (TMEM16F)	CaCC	Chloride channels	dom1_530_878	Ortholog	UP000694405	13146	Eukaryota	Birds	Melopsittacus undulatus	A0A8V5GTA7	A0A8V5GTA7_MELUD	dom1_521_866
Q4KMQ2	ANO6 (TMEM16F)	CaCC	Chloride channels	dom1_530_878	Ortholog	UP000472261	9054	Eukaryota	Birds	Phasianus colchicus	A0A669P819	A0A669P819_PHACC	dom1_534_876
Q4KMQ2	ANO6 (TMEM16F)	CaCC	Chloride channels	dom1_530_878	Ortholog	UP000694409	9135	Eukaryota	Birds	Serinus canaria	A0A8C9KTK5	A0A8C9KTK5_SERCA	dom1_516_862
Q4KMQ2	ANO6 (TMEM16F)	CaCC	Chloride channels	dom1_530_878	Ortholog	UP000472266	2489341	Eukaryota	Birds	Strigops habroptila	A0A672UU46	A0A672UU46_STRHB	dom1_524_869
Q4KMQ2	ANO6 (TMEM16F)	CaCC	Chloride channels	dom1_530_878	Ortholog	UP000007754	59729	Eukaryota	Birds	Taeniopygia guttata	A0A674GWB4	A0A674GWB4_TAEGU	dom1_532_878
Q4KMQ2	ANO6 (TMEM16F)	CaCC	Chloride channels	dom1_530_878	Ortholog	UP000257160	80972	Eukaryota	Fishes	Amphiprion ocellaris	A0A3Q1B2A5	A0A3Q1B2A5_AMPOC	dom1_536_907
Q4KMQ2	ANO6 (TMEM16F)	CaCC	Chloride channels	dom1_530_878	Ortholog	UP000265080	161767	Eukaryota	Fishes	Amphiprion percula	A0A3P8TMQ9	A0A3P8TMQ9_AMPPE	dom1_536_907
Q4KMQ2	ANO6 (TMEM16F)	CaCC	Chloride channels	dom1_530_878	Ortholog	UP000265040	64144	Eukaryota	Fishes	Anabas testudineus	A0A7N6BWL8	A0A7N6BWL8_ANATE	dom1_539_878
Q4KMQ2	ANO6 (TMEM16F)	CaCC	Chloride channels	dom1_530_878	Ortholog	UP000314986	7868	Eukaryota	Fishes	Callorhinchus milii	A0A4W3K274	A0A4W3K274_CALMI	dom1_567_916
Q4KMQ2	ANO6 (TMEM16F)	CaCC	Chloride channels	dom1_530_878	Ortholog	UP000265120	244447	Eukaryota	Fishes	Cynoglossus semilaevis	A0A3P8VT22	A0A3P8VT22_CYNSE	dom1_539_881
Q4KMQ2	ANO6 (TMEM16F)	CaCC	Chloride channels	dom1_530_878	Ortholog	UP000265020	28743	Eukaryota	Fishes	Cyprinodon variegatus	A0A3Q2CKD9	A0A3Q2CKD9_CYPVA	dom1_536_878
Q4KMQ2	ANO6 (TMEM16F)	CaCC	Chloride channels	dom1_530_878	Ortholog	UP000000437	7955	Eukaryota	Fishes	Danio rerio	A0A8M2BBU6	A0A8M2BBU6_DANRE	dom1_529_879
Q4KMQ2	ANO6 (TMEM16F)	CaCC	Chloride channels	dom1_530_878	Ortholog	UP000472264	173247	Eukaryota	Fishes	Echeneis naucrates	A0A665X1P5	A0A665X1P5_ECHNA	dom1_538_878
Q4KMQ2	ANO6 (TMEM16F)	CaCC	Chloride channels	dom1_530_878	Ortholog	UP000265140	8010	Eukaryota	Fishes	Esox lucius	A0A3P8X7T6	A0A3P8X7T6_ESOLU	dom1_535_879
Q4KMQ2	ANO6 (TMEM16F)	CaCC	Chloride channels	dom1_530_878	Ortholog	UP000694546	8049	Eukaryota	Fishes	Gadus morhua	A0A8C5CZE4	A0A8C5CZE4_GADMO	dom1_535_879
Q4KMQ2	ANO6 (TMEM16F)	CaCC	Chloride channels	dom1_530_878	Ortholog	UP000250572	33528	Eukaryota	Fishes	Gambusia affinis	A0A315V7Q9	A0A315V7Q9_GAMAF	dom1_522_864
Q4KMQ2	ANO6 (TMEM16F)	CaCC	Chloride channels	dom1_530_878	Ortholog	UP000007635	69293	Eukaryota	Fishes	Gasterosteus aculeatus	G3Q4R9	G3Q4R9_GASAC	dom1_481_826
Q4KMQ2	ANO6 (TMEM16F)	CaCC	Chloride channels	dom1_530_878	Ortholog	UP000264840	8153	Eukaryota	Fishes	Haplochromis burtoni	A0A3Q2VPQ9	A0A3Q2VPQ9_HAPBU	dom1_532_856
Q4KMQ2	ANO6 (TMEM16F)	CaCC	Chloride channels	dom1_530_878	Ortholog	UP000264800	37003	Eukaryota	Fishes	Kryptolebias marmoratus	A0A3Q3APA2	A0A3Q3APA2_KRYMA	dom1_535_878
Q4KMQ2	ANO6 (TMEM16F)	CaCC	Chloride channels	dom1_530_878	Ortholog	UP000008672	7897	Eukaryota	Fishes	Latimeria chalumnae	H3A8Z3	H3A8Z3_LATCH	dom1_389_735
Q4KMQ2	ANO6 (TMEM16F)	CaCC	Chloride channels	dom1_530_878	Ortholog	UP000018468	7918	Eukaryota	Fishes	Lepisosteus oculatus	W5NI34	W5NI34_LEPOC	dom1_534_886
Q4KMQ2	ANO6 (TMEM16F)	CaCC	Chloride channels	dom1_530_878	Ortholog	UP000261620	94237	Eukaryota	Fishes	Mola mola	A0A3Q3VPQ1	A0A3Q3VPQ1_MOLML	dom1_504_844
Q4KMQ2	ANO6 (TMEM16F)	CaCC	Chloride channels	dom1_530_878	Ortholog	UP000261580	32507	Eukaryota	Fishes	Neolamprologus brichardi	A0A3Q4GBR2	A0A3Q4GBR2_NEOBR	dom1_491_833
Q4KMQ2	ANO6 (TMEM16F)	CaCC	Chloride channels	dom1_530_878	Ortholog	UP000694548	105023	Eukaryota	Fishes	Nothobranchius furzeri	A0A1A7ZCH2	A0A1A7ZCH2_NOTFU	dom1_534_877
Q4KMQ2	ANO6 (TMEM16F)	CaCC	Chloride channels	dom1_530_878	Ortholog	UP000472276	47969	Eukaryota	Fishes	Oreochromis aureus	A0A668UUT0	A0A668UUT0_OREAU	dom1_531_873
Q4KMQ2	ANO6 (TMEM16F)	CaCC	Chloride channels	dom1_530_878	Ortholog	UP000005207	8128	Eukaryota	Fishes	Oreochromis niloticus	A0A669CZ78	A0A669CZ78_ORENI	dom1_543_880
Q4KMQ2	ANO6 (TMEM16F)	CaCC	Chloride channels	dom1_530_878	Ortholog	UP000283210	123683	Eukaryota	Fishes	Oryzias javanicus	A0A3S2P464	A0A3S2P464_ORYJA	dom1_410_736
Q4KMQ2	ANO6 (TMEM16F)	CaCC	Chloride channels	dom1_530_878	Ortholog	UP000001038	8090	Eukaryota	Fishes	Oryzias latipes	H2ME73	H2ME73_ORYLA	dom1_531_874
Q4KMQ2	ANO6 (TMEM16F)	CaCC	Chloride channels	dom1_530_878	Ortholog	UP000646548	30732	Eukaryota	Fishes	Oryzias melastigma	A0A834KY53	A0A834KY53_ORYME	dom1_535_878
Q4KMQ2	ANO6 (TMEM16F)	CaCC	Chloride channels	dom1_530_878	Ortholog	UP000028760	48698	Eukaryota	Fishes	Poecilia formosa	A0A087YEY8	A0A087YEY8_POEFO	dom1_533_875
Q4KMQ2	ANO6 (TMEM16F)	CaCC	Chloride channels	dom1_530_878	Ortholog	UP000242638	8081	Eukaryota	Fishes	Poecilia reticulata	A0A3P9P765	A0A3P9P765_POERE	dom1_533_875
Q4KMQ2	ANO6 (TMEM16F)	CaCC	Chloride channels	dom1_530_878	Ortholog	UP000472267	181472	Eukaryota	Fishes	Salarias fasciatus	A0A672FQC2	A0A672FQC2_SALFA	dom1_536_877
Q4KMQ2	ANO6 (TMEM16F)	CaCC	Chloride channels	dom1_530_878	Ortholog	UP000246464	52904	Eukaryota	Fishes	Scophthalmus maximus	A0A2U9B265	A0A2U9B265_SCOMX	dom1_541_883
Q4KMQ2	ANO6 (TMEM16F)	CaCC	Chloride channels	dom1_530_878	Ortholog	UP000472262	75366	Eukaryota	Fishes	Sinocyclocheilus grahami	A0A672TCU4	A0A672TCU4_SINGR	dom1_534_880
Q4KMQ2	ANO6 (TMEM16F)	CaCC	Chloride channels	dom1_530_878	Ortholog	UP000472265	8175	Eukaryota	Fishes	Sparus aurata	A0A671UC18	A0A671UC18_SPAAU	dom1_537_878
Q4KMQ2	ANO6 (TMEM16F)	CaCC	Chloride channels	dom1_530_878	Ortholog	UP000005226	31033	Eukaryota	Fishes	Takifugu rubripes	H2UZR3	H2UZR3_TAKRU	dom1_553_893
Q4KMQ2	ANO6 (TMEM16F)	CaCC	Chloride channels	dom1_530_878	Ortholog	UP000007303	99883	Eukaryota	Fishes	Tetraodon nigroviridis	H3DMA7	H3DMA7_TETNG	dom1_482_823
Q4KMQ2	ANO6 (TMEM16F)	CaCC	Chloride channels	dom1_530_878	Ortholog	UP000002852	8083	Eukaryota	Fishes	Xiphophorus maculatus	M3ZPA1	M3ZPA1_XIPMA	dom1_533_875
Q4KMQ2	ANO6 (TMEM16F)	CaCC	Chloride channels	dom1_530_878	Ortholog	UP000008912	9646	Eukaryota	Mammals	Ailuropoda melanoleuca	G1MBD8	G1MBD8_AILME	dom1_549_903
Q4KMQ2	ANO6 (TMEM16F)	CaCC	Chloride channels	dom1_530_878	Ortholog	UP000233020	37293	Eukaryota	Mammals	Aotus nancymaae	A0A2K5F1P5	A0A2K5F1P5_AOTNA	dom1_549_903
Q4KMQ2	ANO6 (TMEM16F)	CaCC	Chloride channels	dom1_530_878	Ortholog	UP000694857	9771	Eukaryota	Mammals	Balaenoptera musculus	A0A8B8YIG7	A0A8B8YIG7_BALMU	dom1_551_898
Q4KMQ2	ANO6 (TMEM16F)	CaCC	Chloride channels	dom1_530_878	Ortholog	UP000314981	30522	Eukaryota	Mammals	Bos indicus x Bos taurus	A0A4W2EEQ0	A0A4W2EEQ0_BOBOX	dom1_551_898
Q4KMQ2	ANO6 (TMEM16F)	CaCC	Chloride channels	dom1_530_878	Ortholog	UP000009136	9913	Eukaryota	Mammals	Bos taurus	A0A3Q1M2M7	A0A3Q1M2M7_BOVIN	dom1_547_893
Q4KMQ2	ANO6 (TMEM16F)	CaCC	Chloride channels	dom1_530_878	Ortholog	UP000008225	9483	Eukaryota	Mammals	Callithrix jacchus	F7GF05	F7GF05_CALJA	dom1_549_903
Q4KMQ2	ANO6 (TMEM16F)	CaCC	Chloride channels	dom1_530_878	Ortholog	UP000002254	9615	Eukaryota	Mammals	Canis lupus familiaris	A0A8I3Q4Q6	A0A8I3Q4Q6_CANLF	dom1_548_894
Q4KMQ2	ANO6 (TMEM16F)	CaCC	Chloride channels	dom1_530_878	Ortholog	UP000291000	9925	Eukaryota	Mammals	Capra hircus	A0A452DMJ2	A0A452DMJ2_CAPHI	dom1_551_897
Q4KMQ2	ANO6 (TMEM16F)	CaCC	Chloride channels	dom1_530_878	Ortholog	UP000189704	1868482	Eukaryota	Mammals	Carlito syrichta	A0A1U7V2D0	A0A1U7V2D0_CARSF	dom1_529_876
Q4KMQ2	ANO6 (TMEM16F)	CaCC	Chloride channels	dom1_530_878	Ortholog	UP000005447	10141	Eukaryota	Mammals	Cavia porcellus	A0A286XS79	A0A286XS79_CAVPO	dom1_545_922
Q4KMQ2	ANO6 (TMEM16F)	CaCC	Chloride channels	dom1_530_878	Ortholog	UP000233040	2715852	Eukaryota	Mammals	Cebus imitator	A0A2K5R1T2	A0A2K5R1T2_CEBIM	dom1_523_835
Q4KMQ2	ANO6 (TMEM16F)	CaCC	Chloride channels	dom1_530_878	Ortholog	UP000233060	9531	Eukaryota	Mammals	Cercocebus atys	A0A2K5LYF3	A0A2K5LYF3_CERAT	dom1_506_854
Q4KMQ2	ANO6 (TMEM16F)	CaCC	Chloride channels	dom1_530_878	Ortholog	UP000694398	34839	Eukaryota	Mammals	Chinchilla lanigera	A0A8C2YJJ8	A0A8C2YJJ8_CHILA	dom1_589_944
Q4KMQ2	ANO6 (TMEM16F)	CaCC	Chloride channels	dom1_530_878	Ortholog	UP000029965	60711	Eukaryota	Mammals	Chlorocebus sabaeus	A0A0D9R355	A0A0D9R355_CHLSB	dom1_530_877
Q4KMQ2	ANO6 (TMEM16F)	CaCC	Chloride channels	dom1_530_878	Ortholog	UP000233080	336983	Eukaryota	Mammals	Colobus angolensis palliatus	A0A2K5K6V9	A0A2K5K6V9_COLAP	dom1_551_899
Q4KMQ2	ANO6 (TMEM16F)	CaCC	Chloride channels	dom1_530_878	Ortholog	UP000081671	10020	Eukaryota	Mammals	Dipodomys ordii	A0A1S3FCF9	A0A1S3FCF9_DIPOR	dom1_566_892
Q4KMQ2	ANO6 (TMEM16F)	CaCC	Chloride channels	dom1_530_878	Ortholog	UP000002281	9796	Eukaryota	Mammals	Equus caballus	A0A3Q2HJ63	A0A3Q2HJ63_HORSE	dom1_624_963
Q4KMQ2	ANO6 (TMEM16F)	CaCC	Chloride channels	dom1_530_878	Ortholog	UP000079721	9365	Eukaryota	Mammals	Erinaceus europaeus	A0A1S3WDG7	A0A1S3WDG7_ERIEU	dom1_551_906
Q4KMQ2	ANO6 (TMEM16F)	CaCC	Chloride channels	dom1_530_878	Ortholog	UP000011712	9685	Eukaryota	Mammals	Felis catus	A0A337S2X1	A0A337S2X1_FELCA	dom1_552_899
Q4KMQ2	ANO6 (TMEM16F)	CaCC	Chloride channels	dom1_530_878	Ortholog	UP000028990	885580	Eukaryota	Mammals	Fukomys damarensis	A0A091D9Y4	A0A091D9Y4_FUKDA	dom1_533_889
Q4KMQ2	ANO6 (TMEM16F)	CaCC	Chloride channels	dom1_530_878	Ortholog	UP000001519	9595	Eukaryota	Mammals	Gorilla gorilla gorilla	A0A2I2ZSJ6	A0A2I2ZSJ6_GORGO	dom1_541_888
Q4KMQ2	ANO6 (TMEM16F)	CaCC	Chloride channels	dom1_530_878	Ortholog	UP000006813	10181	Eukaryota	Mammals	Heterocephalus glaber	G5BZ52	G5BZ52_HETGA	dom1_531_904
Q4KMQ2	ANO6 (TMEM16F)	CaCC	Chloride channels	dom1_530_878	Ortholog	UP000005215	43179	Eukaryota	Mammals	Ictidomys tridecemlineatus	I3N1J6	I3N1J6_ICTTR	dom1_504_852
Q4KMQ2	ANO6 (TMEM16F)	CaCC	Chloride channels	dom1_530_878	Ortholog	UP000694385	51337	Eukaryota	Mammals	Jaculus jaculus	A0A8C5KKP3	A0A8C5KKP3_JACJA	dom1_534_881
Q4KMQ2	ANO6 (TMEM16F)	CaCC	Chloride channels	dom1_530_878	Ortholog	UP000007646	9785	Eukaryota	Mammals	Loxodonta africana	G3TVE6	G3TVE6_LOXAF	dom1_438_789
Q4KMQ2	ANO6 (TMEM16F)	CaCC	Chloride channels	dom1_530_878	Ortholog	UP000233100	9541	Eukaryota	Mammals	Macaca fascicularis	A0A2K5W624	A0A2K5W624_MACFA	dom1_553_900
Q4KMQ2	ANO6 (TMEM16F)	CaCC	Chloride channels	dom1_530_878	Ortholog	UP000006718	9544	Eukaryota	Mammals	Macaca mulatta	A0A5F8A0Z8	A0A5F8A0Z8_MACMU	dom1_553_900
Q4KMQ2	ANO6 (TMEM16F)	CaCC	Chloride channels	dom1_530_878	Ortholog	UP000233120	9545	Eukaryota	Mammals	Macaca nemestrina	A0A2K6C3M3	A0A2K6C3M3_MACNE	dom1_551_899
Q4KMQ2	ANO6 (TMEM16F)	CaCC	Chloride channels	dom1_530_878	Ortholog	UP000233140	9568	Eukaryota	Mammals	Mandrillus leucophaeus	A0A2K5Z3T8	A0A2K5Z3T8_MANLE	dom1_551_899
Q4KMQ2	ANO6 (TMEM16F)	CaCC	Chloride channels	dom1_530_878	Ortholog	UP000694394	30608	Eukaryota	Mammals	Microcebus murinus	A0A8B7F7S6	A0A8B7F7S6_MICMU	dom1_532_879
Q4KMQ2	ANO6 (TMEM16F)	CaCC	Chloride channels	dom1_530_878	Ortholog	UP000000589	10090	Eukaryota	Mammals	Mus musculus	Q6P9J9	ANO6_MOUSE	dom1_531_878
Q4KMQ2	ANO6 (TMEM16F)	CaCC	Chloride channels	dom1_530_878	Ortholog	UP000000715	9669	Eukaryota	Mammals	Mustela putorius furo	A0A8U0RTP4	A0A8U0RTP4_MUSPF	dom1_570_924
Q4KMQ2	ANO6 (TMEM16F)	CaCC	Chloride channels	dom1_530_878	Ortholog	UP000001074	59463	Eukaryota	Mammals	Myotis lucifugus	G1P8H6	G1P8H6_MYOLU	dom1_460_808
Q4KMQ2	ANO6 (TMEM16F)	CaCC	Chloride channels	dom1_530_878	Ortholog	UP000694381	1026970	Eukaryota	Mammals	Nannospalax galili	A0A8C6QXC3	A0A8C6QXC3_NANGA	dom1_530_867
Q4KMQ2	ANO6 (TMEM16F)	CaCC	Chloride channels	dom1_530_878	Ortholog	UP000001073	61853	Eukaryota	Mammals	Nomascus leucogenys	G1S8D4	G1S8D4_NOMLE	dom1_551_899
Q4KMQ2	ANO6 (TMEM16F)	CaCC	Chloride channels	dom1_530_878	Ortholog	UP000515203	10160	Eukaryota	Mammals	Octodon degus	A0A6P6F422	A0A6P6F422_OCTDE	dom1_552_907
Q4KMQ2	ANO6 (TMEM16F)	CaCC	Chloride channels	dom1_530_878	Ortholog	UP000002279	9258	Eukaryota	Mammals	Ornithorhynchus anatinus	F7CBG1	F7CBG1_ORNAN	dom1_545_888
Q4KMQ2	ANO6 (TMEM16F)	CaCC	Chloride channels	dom1_530_878	Ortholog	UP000001811	9986	Eukaryota	Mammals	Oryctolagus cuniculus	G1SCS8	G1SCS8_RABIT	dom1_623_992
Q4KMQ2	ANO6 (TMEM16F)	CaCC	Chloride channels	dom1_530_878	Ortholog	UP000005225	30611	Eukaryota	Mammals	Otolemur garnettii	H0XDL6	H0XDL6_OTOGA	dom1_519_867
Q4KMQ2	ANO6 (TMEM16F)	CaCC	Chloride channels	dom1_530_878	Ortholog	UP000002356	9940	Eukaryota	Mammals	Ovis aries	W5QE82	W5QE82_SHEEP	dom1_584_930
Q4KMQ2	ANO6 (TMEM16F)	CaCC	Chloride channels	dom1_530_878	Ortholog	UP000240080	9597	Eukaryota	Mammals	Pan paniscus	A0A2R9BIY8	A0A2R9BIY8_PANPA	dom1_526_873
Q4KMQ2	ANO6 (TMEM16F)	CaCC	Chloride channels	dom1_530_878	Ortholog	UP000002277	9598	Eukaryota	Mammals	Pan troglodytes	A0A2I3RK99	A0A2I3RK99_PANTR	dom1_551_899
Q4KMQ2	ANO6 (TMEM16F)	CaCC	Chloride channels	dom1_530_878	Ortholog	UP000028761	9555	Eukaryota	Mammals	Papio anubis	A0A2I3N4G4	A0A2I3N4G4_PAPAN	dom1_553_900
Q4KMQ2	ANO6 (TMEM16F)	CaCC	Chloride channels	dom1_530_878	Ortholog	UP000001595	9601	Eukaryota	Mammals	Pongo abelii	A0A2J8WCP2	A0A2J8WCP2_PONAB	dom1_551_899
Q4KMQ2	ANO6 (TMEM16F)	CaCC	Chloride channels	dom1_530_878	Ortholog	UP000233160	379532	Eukaryota	Mammals	Propithecus coquereli	A0A2K6FG99	A0A2K6FG99_PROCO	dom1_552_899
Q4KMQ2	ANO6 (TMEM16F)	CaCC	Chloride channels	dom1_530_878	Ortholog	UP000515202	132908	Eukaryota	Mammals	Pteropus vampyrus	A0A6P6CUK4	A0A6P6CUK4_PTEVA	dom1_566_777
Q4KMQ2	ANO6 (TMEM16F)	CaCC	Chloride channels	dom1_530_878	Ortholog	UP000472240	59479	Eukaryota	Mammals	Rhinolophus ferrumequinum	A0A671E3C5	A0A671E3C5_RHIFE	dom1_552_899
Q4KMQ2	ANO6 (TMEM16F)	CaCC	Chloride channels	dom1_530_878	Ortholog	UP000233180	61621	Eukaryota	Mammals	Rhinopithecus bieti	A0A2K6LVG2	A0A2K6LVG2_RHIBE	dom1_197_513
Q4KMQ2	ANO6 (TMEM16F)	CaCC	Chloride channels	dom1_530_878	Ortholog	UP000233200	61622	Eukaryota	Mammals	Rhinopithecus roxellana	A0A2K6NC12	A0A2K6NC12_RHIRO	dom1_551_899
Q4KMQ2	ANO6 (TMEM16F)	CaCC	Chloride channels	dom1_530_878	Ortholog	UP000233220	39432	Eukaryota	Mammals	Saimiri boliviensis boliviensis	A0A2K6SUW3	A0A2K6SUW3_SAIBB	dom1_549_903
Q4KMQ2	ANO6 (TMEM16F)	CaCC	Chloride channels	dom1_530_878	Ortholog	UP000472268	37032	Eukaryota	Mammals	Suricata suricatta	A0A673UGI1	A0A673UGI1_SURSU	dom1_552_899
Q4KMQ2	ANO6 (TMEM16F)	CaCC	Chloride channels	dom1_530_878	Ortholog	UP000245320	9739	Eukaryota	Mammals	Tursiops truncatus	A0A2U4BAC8	A0A2U4BAC8_TURTR	dom1_551_898
Q4KMQ2	ANO6 (TMEM16F)	CaCC	Chloride channels	dom1_530_878	Ortholog	UP000291022	9643	Eukaryota	Mammals	Ursus americanus	A0A452R3R7	A0A452R3R7_URSAM	dom1_544_898
Q4KMQ2	ANO6 (TMEM16F)	CaCC	Chloride channels	dom1_530_878	Ortholog	UP000261680	29073	Eukaryota	Mammals	Ursus maritimus	A0A8M1GRE6	A0A8M1GRE6_URSMA	dom1_549_903
Q4KMQ2	ANO6 (TMEM16F)	CaCC	Chloride channels	dom1_530_878	Ortholog	UP000504605	30538	Eukaryota	Mammals	Vicugna pacos	A0A6J3AZT4	A0A6J3AZT4_VICPA	dom1_560_908
Q4KMQ2	ANO6 (TMEM16F)	CaCC	Chloride channels	dom1_530_878	Ortholog	UP000286640	9627	Eukaryota	Mammals	Vulpes vulpes	A0A3Q7TMA1	A0A3Q7TMA1_VULVU	dom1_548_865
Q4KMQ2	ANO6 (TMEM16F)	CaCC	Chloride channels	dom1_530_878	Ortholog	UP000001646	28377	Eukaryota	Reptiles	Anolis carolinensis	A0A803T2F6	A0A803T2F6_ANOCA	dom1_533_876
Q4KMQ2	ANO6 (TMEM16F)	CaCC	Chloride channels	dom1_530_878	Ortholog	UP000694404	106734	Eukaryota	Reptiles	Chelonoidis abingdonii	A0A8C0JEX6	A0A8C0JEX6_CHEAB	dom1_498_845
Q4KMQ2	ANO6 (TMEM16F)	CaCC	Chloride channels	dom1_530_878	Ortholog	UP000694380	8478	Eukaryota	Reptiles	Chrysemys picta bellii	A0A8C3HP98	A0A8C3HP98_CHRPI	dom1_529_876
Q4KMQ2	ANO6 (TMEM16F)	CaCC	Chloride channels	dom1_530_878	Ortholog	UP000594220	8502	Eukaryota	Reptiles	Crocodylus porosus	A0A7M4EMG8	A0A7M4EMG8_CROPO	dom1_534_881
Q4KMQ2	ANO6 (TMEM16F)	CaCC	Chloride channels	dom1_530_878	Ortholog	UP000007267	13735	Eukaryota	Reptiles	Pelodiscus sinensis	K7FLD8	K7FLD8_PELSI	dom1_528_875
Q4KMQ2	ANO6 (TMEM16F)	CaCC	Chloride channels	dom1_530_878	Ortholog	UP000472272	64176	Eukaryota	Reptiles	Podarcis muralis	A0A670JK09	A0A670JK09_PODMU	dom1_479_826
Q4KMQ2	ANO6 (TMEM16F)	CaCC	Chloride channels	dom1_530_878	Ortholog	UP000472273	8673	Eukaryota	Reptiles	Pseudonaja textilis	A0A670XQH8	A0A670XQH8_PSETE	dom1_452_795
Q4KMQ2	ANO6 (TMEM16F)	CaCC	Chloride channels	dom1_530_878	Ortholog	UP000694392	8508	Eukaryota	Reptiles	Sphenodon punctatus	A0A8D0GY90	A0A8D0GY90_SPHPU	dom1_480_827
Q4KMQ2	ANO6 (TMEM16F)	CaCC	Chloride channels	dom1_530_878	Ortholog	UP000694545	61221	Eukaryota	Reptiles	Varanus komodoensis	A0A8D2Q5X1	A0A8D2Q5X1_VARKO	dom1_518_865
Q4KMQ2	ANO6 (TMEM16F)	CaCC	Chloride channels	dom1_530_878	Co-ortholog	UP000291901	1906665	Archaea	Archaea	archaeon	A0A482UP28	A0A482UP28_9ARCH	dom1_1_76
Q9HCE9	ANO8 (KIAA1623, TMEM16H)	CaCC	Chloride channels	dom1_438_825	Ortholog	UP000186698	8355	Eukaryota	Amphibians	Xenopus laevis	A0A8J1KP08	A0A8J1KP08_XENLA	dom1_435_840
Q9HCE9	ANO8 (KIAA1623, TMEM16H)	CaCC	Chloride channels	dom1_438_825	Ortholog	UP000008143	8364	Eukaryota	Amphibians	Xenopus tropicalis	A0A6I8QME6	A0A6I8QME6_XENTR	dom1_435_841
Q9HCE9	ANO8 (KIAA1623, TMEM16H)	CaCC	Chloride channels	dom1_438_825	Ortholog	UP000014760	283909	Eukaryota	Annelida	Capitella teleta	R7UKG9	R7UKG9_CAPTE	dom2_538_645
Q9HCE9	ANO8 (KIAA1623, TMEM16H)	CaCC	Chloride channels	dom1_438_825	Ortholog	UP000000741	554373	Eukaryota	Basidiomycota	Moniliophthora perniciosa (strain FA553 / isolate CP02)	E2M5Y8	E2M5Y8_MONPE	dom1_12_50
Q9HCE9	ANO8 (KIAA1623, TMEM16H)	CaCC	Chloride channels	dom1_438_825	Ortholog	UP000472269	194338	Eukaryota	Birds	Athene cunicularia	A0A663N819	A0A663N819_ATHCN	dom1_189_433
Q9HCE9	ANO8 (KIAA1623, TMEM16H)	CaCC	Chloride channels	dom1_438_825	Ortholog	UP000276834	44316	Eukaryota	Birds	Chloebia gouldiae	A0A3L8QWE4	A0A3L8QWE4_CHLGU	dom1_1_268
Q9HCE9	ANO8 (KIAA1623, TMEM16H)	CaCC	Chloride channels	dom1_438_825	Co-ortholog	UP000276834	44316	Eukaryota	Birds	Chloebia gouldiae	A0A3L8QVS7	A0A3L8QVS7_CHLGU	dom1_888_1105
Q9HCE9	ANO8 (KIAA1623, TMEM16H)	CaCC	Chloride channels	dom1_438_825	Co-ortholog	UP000276834	44316	Eukaryota	Birds	Chloebia gouldiae	A0A3L8QWF3	A0A3L8QWF3_CHLGU	dom1_1_268
Q9HCE9	ANO8 (KIAA1623, TMEM16H)	CaCC	Chloride channels	dom1_438_825	Ortholog	UP000694562	100819	Eukaryota	Birds	Falco tinnunculus	A0A8C4UGQ2	A0A8C4UGQ2_FALTI	dom1_688_1025
Q9HCE9	ANO8 (KIAA1623, TMEM16H)	CaCC	Chloride channels	dom1_438_825	Ortholog	UP000016665	59894	Eukaryota	Birds	Ficedula albicollis	U3K1B9	U3K1B9_FICAL	dom1_1_84
Q9HCE9	ANO8 (KIAA1623, TMEM16H)	CaCC	Chloride channels	dom1_438_825	Ortholog	UP000000539	9031	Eukaryota	Birds	Gallus gallus	A0A8V1AJI5	A0A8V1AJI5_CHICK	dom1_436_819
Q9HCE9	ANO8 (KIAA1623, TMEM16H)	CaCC	Chloride channels	dom1_438_825	Ortholog	UP000694408	40217	Eukaryota	Birds	Junco hyemalis	A0A8C5IQI1	A0A8C5IQI1_JUNHY	dom1_518_897
Q9HCE9	ANO8 (KIAA1623, TMEM16H)	CaCC	Chloride channels	dom1_438_825	Ortholog	UP000001645	9103	Eukaryota	Birds	Meleagris gallopavo	H9H0K2	H9H0K2_MELGA	dom1_483_788
Q9HCE9	ANO8 (KIAA1623, TMEM16H)	CaCC	Chloride channels	dom1_438_825	Ortholog	UP000694405	13146	Eukaryota	Birds	Melopsittacus undulatus	A0A8V5GTZ3	A0A8V5GTZ3_MELUD	dom1_427_764
Q9HCE9	ANO8 (KIAA1623, TMEM16H)	CaCC	Chloride channels	dom1_438_825	Ortholog	UP000472261	9054	Eukaryota	Birds	Phasianus colchicus	A0A669Q5T7	A0A669Q5T7_PHACC	dom1_436_771
Q9HCE9	ANO8 (KIAA1623, TMEM16H)	CaCC	Chloride channels	dom1_438_825	Ortholog	UP000472266	2489341	Eukaryota	Birds	Strigops habroptila	A0A672UTC4	A0A672UTC4_STRHB	dom1_536_873
Q9HCE9	ANO8 (KIAA1623, TMEM16H)	CaCC	Chloride channels	dom1_438_825	Ortholog	UP000007754	59729	Eukaryota	Birds	Taeniopygia guttata	A0A674GZ87	A0A674GZ87_TAEGU	dom1_437_766
Q9HCE9	ANO8 (KIAA1623, TMEM16H)	CaCC	Chloride channels	dom1_438_825	Ortholog	UP000007110	7668	Eukaryota	Echinoderm	Strongylocentrotus purpuratus	A0A7M7N9U7	A0A7M7N9U7_STRPU	dom1_614_711
Q9HCE9	ANO8 (KIAA1623, TMEM16H)	CaCC	Chloride channels	dom1_438_825	Ortholog	UP000257160	80972	Eukaryota	Fishes	Amphiprion ocellaris	A0A3Q1CC89	A0A3Q1CC89_AMPOC	dom1_463_843
Q9HCE9	ANO8 (KIAA1623, TMEM16H)	CaCC	Chloride channels	dom1_438_825	Ortholog	UP000265080	161767	Eukaryota	Fishes	Amphiprion percula	A0A3P8SCC3	A0A3P8SCC3_AMPPE	dom1_461_846
Q9HCE9	ANO8 (KIAA1623, TMEM16H)	CaCC	Chloride channels	dom1_438_825	Ortholog	UP000018467	7994	Eukaryota	Fishes	Astyanax mexicanus	W5LIG1	W5LIG1_ASTMX	dom1_452_813
Q9HCE9	ANO8 (KIAA1623, TMEM16H)	CaCC	Chloride channels	dom1_438_825	Ortholog	UP000314986	7868	Eukaryota	Fishes	Callorhinchus milii	A0A4W3HNR3	A0A4W3HNR3_CALMI	dom1_397_746
Q9HCE9	ANO8 (KIAA1623, TMEM16H)	CaCC	Chloride channels	dom1_438_825	Ortholog	UP000265120	244447	Eukaryota	Fishes	Cynoglossus semilaevis	A0A3P8WEP4	A0A3P8WEP4_CYNSE	dom1_441_763
Q9HCE9	ANO8 (KIAA1623, TMEM16H)	CaCC	Chloride channels	dom1_438_825	Ortholog	UP000265020	28743	Eukaryota	Fishes	Cyprinodon variegatus	A0A3Q2DJ41	A0A3Q2DJ41_CYPVA	dom1_380_718
Q9HCE9	ANO8 (KIAA1623, TMEM16H)	CaCC	Chloride channels	dom1_438_825	Ortholog	UP000000437	7955	Eukaryota	Fishes	Danio rerio	A0A8N7UT44	A0A8N7UT44_DANRE	dom1_459_818
[truncated: 47,899 more rows]

## Sheet: Table D
Table D: Table showing the enriched GO terms for each IC cluster
[truncated: 1,397 more rows]
